# Supplementary material
Source: publisher figshare collection journal article supplement (https://gsapubs.figshare.com/ndownloader/files/23302286)
Supplement: Supplementary file 1 [file 23302286]

## Sheet: 7122-6-1-2037m
																															Klausen, T.G., Müller, R., Slama, J., and Helland-Hansen, W., 2016, Evidence for Late Triassic provenance areas and Early Jurassic sediment supply turnover in the Barents Sea Basin of northern Pangea: Lithosphere, doi:10.1130/L556.1
																															Raw data results from the detrital zircon U-Pb LA-ICP-MS analyses
	Source file	DateTime	Date	Time	Duration(s)	Comments	Final207_235	Final207_235_Prop2SE	Final206_238	Final206_238_Prop2SE	ErrorCorrelation_6_38vs7_35	Final238_206	Final238_206_Prop2SE	Final207_206	Final207_206_Prop2SE	ErrorCorrelation_38_6vs7_6	Final208_232	Final208_232_Prop2SE	Final206_208	Final206_208_Prop2SE	FinalAge207_235	FinalAge207_235_Prop2SE	FinalAge206_238	FinalAge206_238_Prop2SE	FinalAge208_232	FinalAge208_232_Prop2SE	FinalAge207_206	FinalAge207_206_Prop2SE	Final206_204	Final206_204_Prop2SE	Final207_204	Final207_204_Prop2SE	Final208_204	Final208_204_Prop2SE	Approx_U_PPM	Approx_U_PPM_Prop2SE	Approx_Th_PPM	Approx_Th_PPM_Prop2SE	Approx_Pb_PPM	Approx_Pb_PPM_Prop2SE	FInal_U_Th_Ratio	FInal_U_Th_Ratio_Prop2SE	Final238_206	Final238_206_Prop2SE	FinalDiscPercent	FinalDiscPercent_Prop2SE	Dose	Dose_Prop2SE
Z_GJ1_1	11423_TRA_Data	05/03/2015 (5) 19:02:01.25	05/03/2015 (5)	19:02:01.250000	25.426	11423_TRA_Data, 19:02:01 (25.4 sec)	0.821	0.026	0.0987	0.0034	0.39838			0.06038	0.00077	0.45849	0.0301	0.0025	no value	NAN	607	14	606	20	598	49	584	27	-270	nan	-17	nan	-1	nan	301	nan	9	nan	25	nan	34	nan	10.1317	0.349015	9	nan	634015429708294	nan
Z_GJ1_2	11424_TRA_Data	05/03/2015 (5) 19:03:23.59	05/03/2015 (5)	19:03:23.590000	25.09	11424_TRA_Data, 19:03:24 (25 sec)	0.81	0.025	0.0985	0.0034	0.54075			0.05977	0.00076	0.44928	0.0319	0.0027	no value	NAN	600	14	605	20	631	53	569	28	-283	nan	-18	nan	-1	nan	304	nan	9	nan	27	nan	34	nan	10.1523	0.350434	-22	nan	634334782570408	nan
Z_GJ1_3	11443_TRA_Data	05/03/2015 (5) 19:29:52.36	05/03/2015 (5)	19:29:52.360000	24.317	11443_TRA_Data, 19:29:52 (24.3 sec)	0.806	0.025	0.0959	0.0034	0.47199			0.06063	0.00083	0.46991	0.0296	0.0025	no value	NAN	598	14	590	20	589	50	597	29	-629	nan	-39	nan	-3	nan	298	nan	9	nan	24	nan	33	nan	10.4275	0.369693	15	nan	612452230604198	nan
Z_GJ1_4	11444_TRA_Data	05/03/2015 (5) 19:31:15.16	05/03/2015 (5)	19:31:15.160000	24.518	11444_TRA_Data, 19:31:15 (24.5 sec)	0.807	0.026	0.0973	0.0034	0.5775			0.05994	0.00078	0.4289	0.0306	0.0026	no value	NAN	599	14	598	20	604	51	577	28	-693	nan	-43	nan	-3	nan	304	nan	9	nan	26	nan	33	nan	10.2775	0.359131	-9	nan	628343506282450	nan
Z_GJ1_5	11463_TRA_Data	05/03/2015 (5) 19:57:43.85	05/03/2015 (5)	19:57:43.850000	25.829	11463_TRA_Data, 19:57:44 (25.8 sec)	0.831	0.026	0.1	0.0035	0.56778			0.06014	0.00075	0.46132	0.0321	0.0027	no value	NAN	612	14	614	20	632	52	577	27	-810	nan	-51	nan	-4	nan	298	nan	9	nan	25	nan	33	nan	10	0.35	-78	nan	635579590850471	nan
Z_GJ1_6	11464_TRA_Data	05/03/2015 (5) 19:59:07.32	05/03/2015 (5)	19:59:07.320000	25.358	11464_TRA_Data, 19:59:07 (25.3 sec)	0.814	0.026	0.0983	0.0034	0.51136			0.06006	0.00077	0.46409	0.0292	0.0026	no value	NAN	603	14	604	20	578	50	571	28	-851	nan	-53	nan	-4	nan	298	nan	9	nan	23	nan	33	nan	10.1729	0.351862	-18	nan	624166108400387	nan
Z_GJ1_7	11483_TRA_Data	05/03/2015 (5) 20:25:37.62	05/03/2015 (5)	20:25:37.620000	26.064	11483_TRA_Data, 20:25:38 (26 sec)	0.828	0.026	0.0989	0.0034	0.4332			0.06029	0.00074	0.43843	0.031	0.0026	no value	NAN	611	14	608	20	612	51	591	26	-679	nan	-41	nan	-3	nan	299	nan	9	nan	25	nan	33	nan	10.1112	0.347605	4	nan	634295042688020	nan
Z_GJ1_8	11484_TRA_Data	05/03/2015 (5) 20:27:00.68	05/03/2015 (5)	20:27:00.680000	25.997	11484_TRA_Data, 20:27:01 (25.9 sec)	0.841	0.026	0.1019	0.0035	0.46645			0.05992	0.00076	0.4502	0.0303	0.0026	no value	NAN	618	14	625	21	597	50	575	27	-588	nan	-38	nan	-3	nan	298	nan	9	nan	24	nan	32	nan	9.81354	0.33707	-2	nan	651016388345684	nan
Z_GJ1_9	11503_TRA_Data	05/03/2015 (5) 20:53:31.79	05/03/2015 (5)	20:53:31.790000	24.888	11503_TRA_Data, 20:53:32 (24.8 sec)	0.829	0.026	0.0993	0.0035	0.41241			0.0608	0.00077	0.49256	0.0305	0.0025	no value	NAN	612	14	609	20	602	49	608	27	-533	nan	-33	nan	-2	nan	296	nan	9	nan	25	nan	34	nan	10.0705	0.354952	-17	nan	628729044141994	nan
Z_GJ1_10	11504_TRA_Data	05/03/2015 (5) 20:54:54.89	05/03/2015 (5)	20:54:54.890000	24.787	11504_TRA_Data, 20:54:55 (24.7 sec)	0.815	0.026	0.0976	0.0034	0.48287			0.06057	0.00081	0.54158	0.0303	0.0025	no value	NAN	602	14	599	20	599	49	587	28	-512	nan	-31	nan	-2	nan	305	nan	9	nan	25	nan	33	nan	10.2459	0.356927	-1	nan	632038067121051	nan
Z_GJ1_11	11523_TRA_Data	05/03/2015 (5) 21:21:26.75	05/03/2015 (5)	21:21:26.750000	25.93	11523_TRA_Data, 21:21:27 (25.9 sec)	0.824	0.026	0.0996	0.0034	0.5151			0.05999	0.00077	0.39096	0.0303	0.0026	no value	NAN	609	15	612	20	598	50	576	27	-883	nan	-53	nan	-4	nan	303	nan	9	nan	24	nan	35	nan	10.0402	0.342736	-14	nan	644557737313096	nan
Z_GJ1_12	11524_TRA_Data	05/03/2015 (5) 21:22:49.68	05/03/2015 (5)	21:22:49.680000	25.997	11524_TRA_Data, 21:22:50 (25.9 sec)	0.834	0.026	0.1009	0.0035	0.4844			0.06017	0.00077	0.47835	0.0322	0.0027	no value	NAN	615	14	619	21	634	53	575	28	-803	nan	-50	nan	-4	nan	295	nan	9	nan	25	nan	34	nan	9.9108	0.343784	7	nan	634604854741954	nan
Z_GJ1_13	11543_TRA_Data	05/03/2015 (5) 21:49:22.16	05/03/2015 (5)	21:49:22.160000	24.518	11543_TRA_Data, 21:49:22 (24.5 sec)	0.817	0.026	0.0976	0.0034	0.50639			0.06049	0.00079	0.43997	0.0303	0.0026	no value	NAN	604	14	600	20	599	50	590	29	-1077	nan	-66	nan	-5	nan	305	nan	9	nan	25	nan	33	nan	10.2459	0.356927	6	nan	627804006417571	nan
Z_GJ1_14	11544_TRA_Data	05/03/2015 (5) 21:50:45.36	05/03/2015 (5)	21:50:45.360000	24.317	11544_TRA_Data, 21:50:45 (24.3 sec)	0.803	0.025	0.0978	0.0034	0.4124			0.05998	0.00079	0.47406	0.03	0.0025	no value	NAN	597	14	601	20	595	50	569	29	-948	nan	-59	nan	-5	nan	303	nan	9	nan	25	nan	33	nan	10.2249	0.355469	-10	nan	627782133589132	nan
Z_GJ1_15	11563_TRA_Data	05/03/2015 (5) 22:17:19.49	05/03/2015 (5)	22:17:19.490000	25.19	11563_TRA_Data, 22:17:19 (25.1 sec)	0.832	0.026	0.1002	0.0035	0.50801			0.06013	0.00076	0.48586	0.0299	0.0026	no value	NAN	613	14	615	20	592	50	583	27	-1891	nan	-117	nan	-7	nan	295	nan	9	nan	24	nan	33	nan	9.98004	0.348604	-28	nan	627867711424678	nan
Z_GJ1_16	11564_TRA_Data	05/03/2015 (5) 22:18:42.56	05/03/2015 (5)	22:18:42.560000	25.123	11564_TRA_Data, 22:18:43 (25.1 sec)	0.842	0.027	0.1004	0.0035	0.19139			0.061	0.00087	0.13928	0.0317	0.0027	no value	NAN	616	15	615	20	625	52	590	29	-1919	nan	-117	nan	-9	nan	296	nan	9	nan	25	nan	34	nan	9.96016	0.347217	-4	nan	633920218787331	nan
Z_GJ1_17	11583_TRA_Data	05/03/2015 (5) 22:45:14.93	05/03/2015 (5)	22:45:14.930000	24.754	11583_TRA_Data, 22:45:15 (24.7 sec)	0.821	0.026	0.0987	0.0034	0.52439			0.06	0.00073	0.44364	0.0301	0.0026	no value	NAN	606	14	606	20	595	50	571	27	-1681	nan	-102	nan	-8	nan	302	nan	9	nan	25	nan	33	nan	10.1317	0.349015	-27	nan	639517183540127	nan
Z_GJ1_18	11584_TRA_Data	05/03/2015 (5) 22:46:37.79	05/03/2015 (5)	22:46:37.790000	24.888	11584_TRA_Data, 22:46:38 (24.8 sec)	0.812	0.025	0.098	0.0034	0.58488			0.06033	0.00071	0.48383	0.0303	0.0025	no value	NAN	602	14	602	20	599	50	587	26	-1625	nan	-101	nan	-7	nan	308	nan	9	nan	25	nan	33	nan	10.2041	0.354019	-49	nan	642711139049628	nan
Z_GJ1_19	11603_TRA_Data	05/03/2015 (5) 23:13:10.46	05/03/2015 (5)	23:13:10.460000	24.216	11603_TRA_Data, 23:13:10 (24.2 sec)	0.812	0.026	0.0971	0.0034	0.50578			0.0606	0.0008	0.54401	0.0313	0.0027	no value	NAN	601	14	597	20	618	53	596	28	-2518	nan	-154	nan	-11	nan	301	nan	9	nan	25	nan	33	nan	10.2987	0.360612	-2	nan	625652731211828	nan
Z_GJ1_20	11604_TRA_Data	05/03/2015 (5) 23:14:32.31	05/03/2015 (5)	23:14:32.310000	26.366	11604_TRA_Data, 23:14:32 (26.3 sec)	0.838	0.026	0.1014	0.0035	0.44233			0.05978	0.00078	0.45924	0.0306	0.0026	no value	NAN	616	14	623	21	606	51	562	28	-2866	nan	-178	nan	-14	nan	299	nan	9	nan	25	nan	33	nan	9.86193	0.340402	127	nan	648017850082402	nan
Z_GJ1_21	11623_TRA_Data	05/03/2015 (5) 23:41:06.25	05/03/2015 (5)	23:41:06.250000	26.434	11623_TRA_Data, 23:41:06 (26.4 sec)	0.836	0.026	0.1022	0.0036	0.56085			0.05949	0.00074	0.5469	0.0306	0.0026	no value	NAN	615	14	626	21	606	51	553	27	-3312	nan	-202	nan	-14	nan	297	nan	9	nan	24	nan	33	nan	9.78474	0.344668	-14	nan	648791717930497	nan
Z_GJ1_22	11624_TRA_Data	05/03/2015 (5) 23:42:28.36	05/03/2015 (5)	23:42:28.360000	24.317	11624_TRA_Data, 23:42:28 (24.3 sec)	0.806	0.025	0.0976	0.0034	0.36929			0.06023	0.00088	0.50532	0.0306	0.0026	no value	NAN	600	14	599	20	606	52	574	32	-2712	nan	-167	nan	-13	nan	309	nan	9	nan	26	nan	33	nan	10.2459	0.356927	5	nan	640116581283719	nan
Z_GJ1_23	11643_TRA_Data	06/03/2015 (6) 00:09:03.06	06/03/2015 (6)	00:09:03.060000	24.619	11643_TRA_Data, 00:09:03 (24.6 sec)	0.824	0.026	0.0994	0.0035	0.4586			0.05995	0.00075	0.46768	0.0304	0.0025	no value	NAN	608	14	610	20	611	51	572	27	-1970	nan	-122	nan	-9	nan	303	nan	9	nan	25	nan	33	nan	10.0604	0.354238	-104	nan	642233129175152	nan
Z_GJ1_24	11644_TRA_Data	06/03/2015 (6) 00:10:25.96	06/03/2015 (6)	00:10:25.960000	24.72	11644_TRA_Data, 00:10:26 (24.7 sec)	0.826	0.026	0.1008	0.0035	0.38873			0.05972	0.00077	0.5409	0.0315	0.0027	no value	NAN	610	14	618	20	621	52	564	28	-2633	nan	-161	nan	-12	nan	303	nan	9	nan	26	nan	33	nan	9.92064	0.344467	17	nan	648871343815256	nan
Z_GJ1_25	11663_TRA_Data	06/03/2015 (6) 00:37:04.03	06/03/2015 (6)	00:37:04.030000	24.653	11663_TRA_Data, 00:37:04 (24.6 sec)	0.808	0.025	0.0972	0.0034	0.45262			0.06013	0.00076	0.44195	0.029	0.0025	no value	NAN	599	14	597	20	574	48	572	28	15652	nan	956	nan	68	nan	307	nan	9	nan	24	nan	33	nan	10.2881	0.359871	-29	nan	643165870105785	nan
Z_GJ1_26	11664_TRA_Data	06/03/2015 (6) 00:38:27.46	06/03/2015 (6)	00:38:27.460000	24.216	11664_TRA_Data, 00:38:27 (24.2 sec)	0.802	0.025	0.097	0.0034	0.53198			0.06015	0.00077	0.48747	0.03	0.0026	no value	NAN	598	14	596	20	595	51	571	28	12713	nan	767	nan	53	nan	312	nan	9	nan	26	nan	33	nan	10.3093	0.361356	-5	nan	644834656923544	nan
Z_GJ1_27	11683_TRA_Data	06/03/2015 (6) 01:05:06.58	06/03/2015 (6)	01:05:06.580000	26.098	11683_TRA_Data, 01:05:07 (26 sec)	0.841	0.026	0.1016	0.0035	0.46169			0.0601	0.00079	0.5051	0.0316	0.0026	no value	NAN	617	15	622	20	623	51	576	28	112642	nan	6910	nan	527	nan	297	nan	9	nan	26	nan	34	nan	9.84252	0.339063	57	nan	647479172888394	nan
Z_GJ1_28	11684_TRA_Data	06/03/2015 (6) 01:06:29.39	06/03/2015 (6)	01:06:29.390000	25.291	11684_TRA_Data, 01:06:29 (25.2 sec)	0.817	0.025	0.099	0.0034	0.5038			0.06007	0.00075	0.44248	0.0311	0.0026	no value	NAN	605	14	608	20	616	51	567	27	784667	nan	48944	nan	4452	nan	308	nan	9	nan	27	nan	33	nan	10.101	0.346903	-10	nan	647380890243028	nan
Z_GJ1_29	11703_TRA_Data	06/03/2015 (6) 01:33:10.32	06/03/2015 (6)	01:33:10.320000	25.358	11703_TRA_Data, 01:33:10 (25.3 sec)	0.828	0.026	0.1001	0.0034	0.43893			0.06006	0.00074	0.43169	0.0311	0.0027	no value	NAN	610	14	614	20	612	52	573	27	14578	nan	884	nan	69	nan	306	nan	9	nan	27	nan	33	nan	9.99001	0.339321	-21	nan	649506768625224	nan
Z_GJ1_30	11704_TRA_Data	06/03/2015 (6) 01:34:32.86	06/03/2015 (6)	01:34:32.860000	24.821	11704_TRA_Data, 01:34:33 (24.8 sec)	0.817	0.026	0.0992	0.0035	0.47101			0.05971	0.00077	0.49559	0.0307	0.0026	no value	NAN	605	14	609	20	605	50	572	28	10646	nan	650	nan	52	nan	308	nan	9	nan	27	nan	33	nan	10.0807	0.355668	35	nan	651257379418236	nan
Z_GJ1_31	11723_TRA_Data	06/03/2015 (6) 02:01:11.56	06/03/2015 (6)	02:01:11.560000	25.123	11723_TRA_Data, 02:01:12 (25.1 sec)	0.823	0.026	0.0991	0.0034	0.4376			0.0601	0.0008	0.5072	0.0305	0.0026	no value	NAN	608	14	608	20	602	51	581	29	2962	nan	183	nan	12	nan	302	nan	9	nan	25	nan	34	nan	10.0908	0.346204	-9	nan	644196262720916	nan
Z_GJ1_32	11724_TRA_Data	06/03/2015 (6) 02:02:34.68	06/03/2015 (6)	02:02:34.680000	25.997	11724_TRA_Data, 02:02:35 (25.9 sec)	0.847	0.026	0.102	0.0035	0.43786			0.0604	0.00078	0.48665	0.03	0.0026	no value	NAN	621	15	625	21	593	51	584	28	2354	nan	146	nan	10	nan	277	nan	8	nan	23	nan	34	nan	9.80392	0.336409	-14	nan	602149029983070	nan
Z_GJ1_33	11763_TRA_Data	06/03/2015 (6) 02:57:13.46	06/03/2015 (6)	02:57:13.460000	24.216	11763_TRA_Data, 02:57:13 (24.2 sec)	0.809	0.025	0.0981	0.0035	0.23936			0.06043	0.00077	0.48858	0.0294	0.0025	no value	NAN	600	14	602	20	583	50	588	28	1881	nan	116	nan	8	nan	315	nan	9	nan	25	nan	34	nan	10.1937	0.363689	1	nan	652262298180862	nan
Z_GJ1_34	11764_TRA_Data	06/03/2015 (6) 02:58:36.35	06/03/2015 (6)	02:58:36.350000	26.333	11764_TRA_Data, 02:58:36 (26.3 sec)	0.839	0.026	0.1026	0.0035	0.45683			0.05927	0.00076	0.48064	0.032	0.0028	no value	NAN	617	14	629	21	633	55	546	28	1572	nan	94	nan	8	nan	272	nan	8	nan	24	nan	34	nan	9.74659	0.332486	-22	nan	600782668057788	nan
Z_GJ1_35	11783_TRA_Data	06/03/2015 (6) 03:25:15.56	06/03/2015 (6)	03:25:15.560000	25.123	11783_TRA_Data, 03:25:16 (25.1 sec)	0.812	0.025	0.0975	0.0034	0.58575			0.06007	0.00076	0.49401	0.0295	0.0026	no value	NAN	602	14	599	20	585	50	575	27	3892	nan	237	nan	17	nan	317	nan	10	nan	26	nan	33	nan	10.2564	0.357659	-31	nan	660596602547747	nan
Z_GJ1_36	11784_TRA_Data	06/03/2015 (6) 03:26:37.72	06/03/2015 (6)	03:26:37.720000	24.955	11784_TRA_Data, 03:26:38 (24.9 sec)	0.834	0.027	0.0997	0.0035	0.25688			0.06056	0.00083	0.20304	0.0321	0.003	no value	NAN	610	14	612	20	630	57	581	27	3398	nan	213	nan	12	nan	278	nan	8	nan	24	nan	33	nan	10.0301	0.35211	4	nan	585556849739558	nan
Z_GJ1_37	11803_TRA_Data	06/03/2015 (6) 03:53:24.63	06/03/2015 (6)	03:53:24.630000	24.048	11803_TRA_Data, 03:53:25 (24 sec)	0.81	0.025	0.0983	0.0034	0.4755			0.05964	0.00078	0.47223	0.0305	0.0027	no value	NAN	600	14	604	20	604	52	560	29	-3895	nan	-238	nan	-17	nan	297	nan	9	nan	25	nan	35	nan	10.1729	0.351862	-14	nan	619138727187681	nan
Z_GJ1_38	11804_TRA_Data	06/03/2015 (6) 03:54:47.75	06/03/2015 (6)	03:54:47.750000	25.93	11804_TRA_Data, 03:54:48 (25.9 sec)	0.836	0.026	0.1009	0.0035	0.40516			0.06014	0.00077	0.48272	0.0314	0.0026	no value	NAN	615	14	620	20	620	51	572	28	-4294	nan	-268	nan	-20	nan	301	nan	9	nan	26	nan	33	nan	9.9108	0.343784	2	nan	651320164530423	nan
Z_GJ1_39	11823_TRA_Data	06/03/2015 (6) 04:21:20.89	06/03/2015 (6)	04:21:20.890000	24.787	11823_TRA_Data, 04:21:21 (24.7 sec)	0.819	0.026	0.0993	0.0035	0.4847			0.05951	0.00078	0.48505	0.0287	0.0026	no value	NAN	606	14	610	20	565	51	556	29	-8743	nan	-525	nan	-35	nan	286	nan	9	nan	22	nan	34	nan	10.0705	0.354952	3	nan	608148978117619	nan
Z_GJ1_40	11824_TRA_Data	06/03/2015 (6) 04:22:44.70	06/03/2015 (6)	04:22:44.700000	23.981	11824_TRA_Data, 04:22:45 (23.9 sec)	0.801	0.025	0.0957	0.0034	0.52704			0.06022	0.00077	0.47509	0.031	0.0027	no value	NAN	596	14	589	19	610	52	586	28	-13145	nan	-825	nan	-63	nan	317	nan	10	nan	26	nan	33	nan	10.4493	0.37124	22	nan	643006011700258	nan
Z_GJ1_41	11843_TRA_Data	06/03/2015 (6) 04:49:18.39	06/03/2015 (6)	04:49:18.390000	25.291	11843_TRA_Data, 04:49:18 (25.2 sec)	0.825	0.026	0.0995	0.0035	0.44802			0.06013	0.00079	0.48696	0.0303	0.0027	no value	NAN	610	14	611	20	599	54	569	29	3472	nan	214	nan	12	nan	285	nan	8	nan	24	nan	34	nan	10.0503	0.353526	8	nan	606940400818022	nan
Z_GJ1_42	11844_TRA_Data	06/03/2015 (6) 04:50:40.83	06/03/2015 (6)	04:50:40.830000	24.854	11844_TRA_Data, 04:50:41 (24.8 sec)	0.821	0.026	0.098	0.0034	0.3572			0.06078	0.00086	0.33151	0.0323	0.0029	no value	NAN	606	14	602	20	635	56	590	30	3096	nan	191	nan	15	nan	294	nan	9	nan	26	nan	34	nan	10.2041	0.354019	0	nan	612627636802737	nan
Z_GJ1_43	11863_TRA_Data	06/03/2015 (6) 05:17:18.41	06/03/2015 (6)	05:17:18.410000	26.266	11863_TRA_Data, 05:17:18 (26.2 sec)	0.838	0.026	0.1007	0.0035	0.54898			0.06006	0.00072	0.4388	0.0312	0.0027	no value	NAN	616	14	618	20	618	52	576	26	1838	nan	112	nan	8	nan	300	nan	9	nan	25	nan	33	nan	9.93049	0.345151	-4	nan	649867190980735	nan
Z_GJ1_44	11864_TRA_Data	06/03/2015 (6) 05:18:40.40	06/03/2015 (6)	05:18:40.400000	24.283	11864_TRA_Data, 05:18:40 (24.2 sec)	0.81	0.026	0.0959	0.0034	0.49765			0.06102	0.00082	0.44245	0.0297	0.0027	no value	NAN	602	14	591	19	586	52	603	30	1292	nan	81	nan	5	nan	286	nan	8	nan	23	nan	34	nan	10.4275	0.369693	-27	nan	587452544636657	nan
Z_GJ1_45	11883_TRA_Data	06/03/2015 (6) 05:45:16.56	06/03/2015 (6)	05:45:16.560000	25.123	11883_TRA_Data, 05:45:17 (25.1 sec)	0.806	0.025	0.0982	0.0034	0.39995			0.05994	0.00081	0.57165	0.0297	0.0026	no value	NAN	600	14	603	20	586	50	570	29	1076	nan	65	nan	5	nan	311	nan	9	nan	25	nan	33	nan	10.1833	0.352579	18	nan	646072674691681	nan
Z_GJ1_46	11884_TRA_Data	06/03/2015 (6) 05:46:39.39	06/03/2015 (6)	05:46:39.390000	25.291	11884_TRA_Data, 05:46:39 (25.2 sec)	0.818	0.026	0.0986	0.0034	0.50074			0.06007	0.00077	0.48401	0.0303	0.0026	no value	NAN	604	14	605	20	597	51	573	28	1054	nan	65	nan	6	nan	305	nan	9	nan	25	nan	33	nan	10.142	0.349724	-41	nan	645441434138004	nan
Z_GJ1_47	11903_TRA_Data	06/03/2015 (6) 06:13:12.62	06/03/2015 (6)	06:13:12.620000	26.064	11903_TRA_Data, 06:13:13 (26 sec)	0.825	0.026	0.0998	0.0035	0.49285			0.0601	0.00078	0.46838	0.033	0.0029	no value	NAN	608	14	612	20	649	55	570	28	4104	nan	255	nan	18	nan	294	nan	9	nan	25	nan	34	nan	10.02	0.351404	1	nan	628380819247492	nan
Z_GJ1_48	11904_TRA_Data	06/03/2015 (6) 06:14:35.45	06/03/2015 (6)	06:14:35.450000	26.232	11904_TRA_Data, 06:14:35 (26.2 sec)	0.844	0.026	0.1017	0.0035	0.53607			0.06023	0.00074	0.36865	0.0311	0.0028	no value	NAN	620	15	624	21	612	54	580	27	4370	nan	272	nan	15	nan	303	nan	9	nan	25	nan	33	nan	9.83284	0.338397	37	nan	660163743844687	nan
Z_GJ1_49	11923_TRA_Data	06/03/2015 (6) 06:41:10.99	06/03/2015 (6)	06:41:10.990000	25.694	11923_TRA_Data, 06:41:11 (25.6 sec)	0.827	0.026	0.0994	0.0035	0.50031			0.06036	0.00077	0.42912	0.0294	0.0027	no value	NAN	610	14	610	20	586	54	589	28	1148	nan	73	nan	5	nan	280	nan	8	nan	21	nan	33	nan	10.0604	0.354238	8	nan	597911367050473	nan
Z_GJ1_50	11924_TRA_Data	06/03/2015 (6) 06:42:34.26	06/03/2015 (6)	06:42:34.260000	24.418	11924_TRA_Data, 06:42:34 (24.4 sec)	0.81	0.025	0.0975	0.0034	0.47043			0.0603	0.00082	0.48314	0.0294	0.0026	no value	NAN	601	14	599	20	585	51	576	29	1138	nan	71	nan	5	nan	306	nan	9	nan	25	nan	32	nan	10.2564	0.357659	27	nan	637510774592724	nan
Z_GJ1_51	11943_TRA_Data	06/03/2015 (6) 07:09:08.75	06/03/2015 (6)	07:09:08.750000	25.93	11943_TRA_Data, 07:09:09 (25.9 sec)	0.832	0.026	0.1003	0.0035	0.48038			0.06015	0.00078	0.55337	0.0314	0.0028	no value	NAN	613	14	616	20	617	54	573	28	1222	nan	77	nan	6	nan	295	nan	9	nan	25	nan	33	nan	9.97009	0.347909	-7	nan	633223036464008	nan
Z_GJ1_52	11944_TRA_Data	06/03/2015 (6) 07:10:32.12	06/03/2015 (6)	07:10:32.120000	25.56	11944_TRA_Data, 07:10:32 (25.5 sec)	0.82	0.026	0.0989	0.0034	0.48323			0.06013	0.00077	0.4492	0.03	0.0026	no value	NAN	606	14	608	20	591	51	575	28	1195	nan	74	nan	5	nan	309	nan	9	nan	25	nan	33	nan	10.1112	0.347605	6	nan	653615354599192	nan
Z_GJ1_53	11963_TRA_Data	06/03/2015 (6) 07:37:03.23	06/03/2015 (6)	07:37:03.230000	24.451	11963_TRA_Data, 07:37:03 (24.4 sec)	0.803	0.025	0.0971	0.0034	0.49705			0.05957	0.00076	0.44654	0.0317	0.0027	no value	NAN	597	14	597	20	624	53	561	27	1004	nan	63	nan	4	nan	311	nan	9	nan	27	nan	33	nan	10.2987	0.360612	75	nan	648177611254656	nan
Z_GJ1_54	11964_TRA_Data	06/03/2015 (6) 07:38:25.62	06/03/2015 (6)	07:38:25.620000	26.064	11964_TRA_Data, 07:38:26 (26 sec)	0.826	0.026	0.0991	0.0034	0.43769			0.06027	0.00075	0.45081	0.0296	0.0026	no value	NAN	609	14	609	20	585	51	585	27	799	nan	49	nan	4	nan	306	nan	9	nan	25	nan	33	nan	10.0908	0.346204	12	nan	649197697710553	nan
Z_GJ1_55	11983_TRA_Data	06/03/2015 (6) 08:04:57.58	06/03/2015 (6)	08:04:57.580000	26.098	11983_TRA_Data, 08:04:58 (26 sec)	0.841	0.027	0.1007	0.0035	0.53573			0.06032	0.00075	0.42329	0.0313	0.0027	no value	NAN	618	14	618	20	616	52	585	27	619	nan	39	nan	3	nan	301	nan	9	nan	26	nan	33	nan	9.93049	0.345151	-13	nan	647599633462958	nan
Z_GJ1_56	11984_TRA_Data	06/03/2015 (6) 08:06:20.76	06/03/2015 (6)	08:06:20.760000	24.922	11984_TRA_Data, 08:06:21 (24.9 sec)	0.819	0.026	0.0972	0.0034	0.1086			0.061	0.00083	0.045467	0.0312	0.0027	no value	NAN	604	15	598	20	618	52	595	29	498	nan	32	nan	2	nan	309	nan	9	nan	27	nan	34	nan	10.2881	0.359871	-13	nan	638770631415028	nan
Z_GJ1_57	12000_TRA_Data	06/03/2015 (6) 08:28:43.56	06/03/2015 (6)	08:28:43.560000	25.123	12000_TRA_Data, 08:28:44 (25.1 sec)	0.82	0.026	0.0996	0.0035	0.46211			0.05987	0.00079	0.44397	0.0316	0.0028	no value	NAN	606	14	612	20	627	54	565	28	192	nan	11	nan	1	nan	307	nan	9	nan	26	nan	33	nan	10.0402	0.352817	-11	nan	648312132597862	nan
Z_GJ1_58	12001_TRA_Data	06/03/2015 (6) 08:30:06.16	06/03/2015 (6)	08:30:06.160000	24.518	12001_TRA_Data, 08:30:06 (24.5 sec)	0.808	0.025	0.0974	0.0034	0.46112			0.06031	0.00078	0.48109	0.029	0.0026	no value	NAN	599	14	598	20	571	50	582	28	196	nan	12	nan	1	nan	312	nan	9	nan	25	nan	33	nan	10.2669	0.358394	24	nan	644170950196884	nan
Z_Plesovice_1	11425_TRA_Data	05/03/2015 (5) 19:04:49.04	05/03/2015 (5)	19:04:49.040000	23.645	11425_TRA_Data, 19:04:49 (23.6 sec)	0.382	0.012	0.0494	0.0017	0.5334			0.0563	0.00066	0.42567	0.01445	0.00095	no value	NAN	328	8.8	311	10	290	19	432	26	-316	nan	-18	nan	-11	nan	624	nan	121	nan	164	nan	5	nan	20.2429	0.696619	25	nan	669134654513897	nan
Z_Plesovice_2	11426_TRA_Data	05/03/2015 (5) 19:06:16.39	05/03/2015 (5)	19:06:16.390000	21.293	11426_TRA_Data, 19:06:16 (21.2 sec)	0.39	0.012	0.0528	0.0018	0.54463			0.0534	0.00065	0.36789	0.0163	0.0011	no value	NAN	333.1	9	331	11	326	22	322	27	-351	nan	-19	nan	-10	nan	541	nan	80	nan	126	nan	7	nan	18.9394	0.645661	54	nan	617384527093242	nan
Z_Plesovice_3	11445_TRA_Data	05/03/2015 (5) 19:32:40.46	05/03/2015 (5)	19:32:40.460000	25.224	11445_TRA_Data, 19:32:40 (25.2 sec)	0.384	0.012	0.0527	0.0018	0.47621			0.05279	0.00059	0.38055	0.0168	0.0011	no value	NAN	329	8.7	331	11	337	22	298	25	-623	nan	-34	nan	-17	nan	592	nan	86	nan	132	nan	7	nan	18.9753	0.648114	47	nan	674540634129325	nan
Z_Plesovice_4	11446_TRA_Data	05/03/2015 (5) 19:34:03.42	05/03/2015 (5)	19:34:03.420000	25.258	11446_TRA_Data, 19:34:03 (25.2 sec)	0.392	0.012	0.0534	0.0018	0.5163			0.05337	0.00061	0.40175	0.0172	0.0011	no value	NAN	335.4	8.9	335	11	344	23	321	25	-601	nan	-34	nan	-17	nan	576	nan	84	nan	130	nan	7	nan	18.7266	0.631233	56	nan	664216923677730	nan
Z_Plesovice_5	11465_TRA_Data	05/03/2015 (5) 20:00:33.53	05/03/2015 (5)	20:00:33.530000	24.149	11465_TRA_Data, 20:00:34 (24.1 sec)	0.378	0.012	0.0518	0.0018	0.48243			0.05286	0.00062	0.38631	0.0171	0.0011	no value	NAN	324.3	8.6	325	11	343	22	295	26	-995	nan	-54	nan	-29	nan	588	nan	85	nan	130	nan	7	nan	19.305	0.670831	99	nan	657328299424444	nan
Z_Plesovice_6	11466_TRA_Data	05/03/2015 (5) 20:01:56.99	05/03/2015 (5)	20:01:56.990000	25.694	11466_TRA_Data, 20:01:57 (25.6 sec)	0.396	0.012	0.0544	0.0019	0.52339			0.05272	0.00057	0.35801	0.0174	0.0011	no value	NAN	337.6	8.9	341	11	348	23	292	23	-808	nan	-43	nan	-22	nan	568	nan	83	nan	129	nan	7	nan	18.3823	0.642031	48	nan	671053949855883	nan
Z_Plesovice_7	11485_TRA_Data	05/03/2015 (5) 20:28:26.05	05/03/2015 (5)	20:28:26.050000	25.627	11485_TRA_Data, 20:28:26 (25.6 sec)	0.397	0.012	0.0539	0.0018	0.514			0.05349	0.00061	0.38521	0.0168	0.0011	no value	NAN	338.5	8.9	338	11	336	22	325	25	-636	nan	-35	nan	-17	nan	580	nan	84	nan	126	nan	7	nan	18.5529	0.619577	64	nan	678256018351787	nan
Z_Plesovice_8	11486_TRA_Data	05/03/2015 (5) 20:29:48.93	05/03/2015 (5)	20:29:48.930000	24.754	11486_TRA_Data, 20:29:49 (24.7 sec)	0.386	0.012	0.052	0.0018	0.47864			0.05366	0.00062	0.4062	0.0173	0.0011	no value	NAN	330.5	8.7	327	11	346	23	330	25	-658	nan	-35	nan	-19	nan	584	nan	85	nan	132	nan	7	nan	19.2308	0.665681	17	nan	660664390987670	nan
Z_Plesovice_9	11505_TRA_Data	05/03/2015 (5) 20:56:19.45	05/03/2015 (5)	20:56:19.450000	26.232	11505_TRA_Data, 20:56:19 (26.2 sec)	0.395	0.012	0.0541	0.0018	0.51041			0.05301	0.00056	0.42788	0.0169	0.0011	no value	NAN	337.4	8.9	339	11	339	22	303	23	-594	nan	-32	nan	-18	nan	574	nan	84	nan	129	nan	7	nan	18.4843	0.615004	58	nan	676274061713282	nan
Z_Plesovice_10	11506_TRA_Data	05/03/2015 (5) 20:57:42.28	05/03/2015 (5)	20:57:42.280000	26.4	11506_TRA_Data, 20:57:42 (26.4 sec)	0.398	0.012	0.0549	0.0019	0.52214			0.05267	0.00061	0.43672	0.0168	0.0011	no value	NAN	339.1	8.9	344	12	337	22	290	25	-489	nan	-26	nan	-13	nan	561	nan	81	nan	125	nan	7	nan	18.2149	0.630389	43	nan	662952584060646	nan
Z_Plesovice_11	11525_TRA_Data	05/03/2015 (5) 21:24:15.20	05/03/2015 (5)	21:24:15.200000	24.485	11525_TRA_Data, 21:24:15 (24.4 sec)	0.386	0.012	0.0528	0.0018	0.58839			0.05302	0.00057	0.35987	0.0162	0.0011	no value	NAN	330.6	8.8	332	11	324	21	305	24	-803	nan	-42	nan	-22	nan	588	nan	87	nan	130	nan	7	nan	18.9394	0.645661	66	nan	668984045470057	nan
Z_Plesovice_12	11526_TRA_Data	05/03/2015 (5) 21:25:38.28	05/03/2015 (5)	21:25:38.280000	26.4	11526_TRA_Data, 21:25:38 (26.4 sec)	0.399	0.012	0.0545	0.0019	0.5536			0.05315	0.00056	0.38539	0.0171	0.0011	no value	NAN	340.2	9	342	11	343	22	310	23	-784	nan	-42	nan	-22	nan	561	nan	82	nan	128	nan	7	nan	18.3486	0.639677	95	nan	663783003857470	nan
Z_Plesovice_13	11545_TRA_Data	05/03/2015 (5) 21:52:10.52	05/03/2015 (5)	21:52:10.520000	26.165	11545_TRA_Data, 21:52:11 (26.1 sec)	0.399	0.012	0.0551	0.0019	0.52784			0.0526	0.00058	0.38146	0.0175	0.0012	no value	NAN	340.2	9	345	11	350	23	288	24	-1153	nan	-61	nan	-34	nan	571	nan	84	nan	131	nan	6	nan	18.1488	0.625821	105	nan	680447020016552	nan
Z_Plesovice_14	11546_TRA_Data	05/03/2015 (5) 21:53:34.59	05/03/2015 (5)	21:53:34.590000	25.09	11546_TRA_Data, 21:53:35 (25 sec)	0.389	0.012	0.0533	0.0018	0.51051			0.05306	0.00059	0.36515	0.0166	0.0011	no value	NAN	333.4	8.8	335	11	333	22	305	25	-1216	nan	-66	nan	-34	nan	574	nan	84	nan	127	nan	7	nan	18.7617	0.633604	52	nan	663877129098523	nan
Z_Plesovice_15	11565_TRA_Data	05/03/2015 (5) 22:20:08.25	05/03/2015 (5)	22:20:08.250000	26.434	11565_TRA_Data, 22:20:08 (26.4 sec)	0.404	0.012	0.0553	0.0019	0.5468			0.05313	0.00057	0.35313	0.017	0.0011	no value	NAN	344.1	9.1	347	11	340	22	312	24	-2072	nan	-111	nan	-57	nan	569	nan	85	nan	128	nan	6	nan	18.0832	0.621303	45	nan	681966098408080	nan
Z_Plesovice_16	11566_TRA_Data	05/03/2015 (5) 22:21:32.19	05/03/2015 (5)	22:21:32.190000	25.493	11566_TRA_Data, 22:21:32 (25.4 sec)	0.398	0.012	0.054	0.0018	0.55646			0.05355	0.0006	0.32621	0.0169	0.0011	no value	NAN	339.7	9	339	11	339	22	325	24	-1581	nan	-83	nan	-45	nan	571	nan	83	nan	128	nan	7	nan	18.5185	0.617284	53	nan	665528588521974	nan
Z_Plesovice_17	11585_TRA_Data	05/03/2015 (5) 22:48:07.49	05/03/2015 (5)	22:48:07.490000	21.192	11585_TRA_Data, 22:48:07 (21.1 sec)	0.387	0.012	0.0535	0.0018	0.52109			0.05221	0.00064	0.35602	0.0171	0.0011	no value	NAN	331.3	8.9	336	11	343	23	271	27	-1688	nan	-90	nan	-44	nan	554	nan	84	nan	132	nan	6	nan	18.6916	0.628876	44	nan	642735478317147	nan
Z_Plesovice_18	11586_TRA_Data	05/03/2015 (5) 22:49:29.66	05/03/2015 (5)	22:49:29.660000	21.024	11586_TRA_Data, 22:49:30 (21 sec)	0.386	0.012	0.0525	0.0018	0.58116			0.05341	0.00064	0.35081	0.0172	0.0011	no value	NAN	330.4	8.9	330	11	344	23	319	26	-1692	nan	-89	nan	-48	nan	560	nan	83	nan	131	nan	6	nan	19.0476	0.653061	65	nan	629365831481111	nan
Z_Plesovice_19	11605_TRA_Data	05/03/2015 (5) 23:15:58.48	05/03/2015 (5)	23:15:58.480000	26.198	11605_TRA_Data, 23:15:58 (26.1 sec)	0.394	0.012	0.0541	0.0018	0.52525			0.05281	0.00057	0.38467	0.0165	0.0011	no value	NAN	336.3	8.9	339	11	331	21	296	24	-3226	nan	-171	nan	-86	nan	598	nan	89	nan	134	nan	6	nan	18.4843	0.615004	38	nan	700793937882023	nan
Z_Plesovice_20	11606_TRA_Data	05/03/2015 (5) 23:17:21.72	05/03/2015 (5)	23:17:21.720000	24.955	11606_TRA_Data, 23:17:22 (24.9 sec)	0.39	0.012	0.0531	0.0018	0.51781			0.05292	0.00059	0.40238	0.0162	0.0011	no value	NAN	333	8.8	334	11	325	21	301	24	-3445	nan	-187	nan	-96	nan	585	nan	87	nan	130	nan	6	nan	18.8324	0.638386	11	nan	677818646871469	nan
Z_Plesovice_21	11625_TRA_Data	05/03/2015 (5) 23:43:53.93	05/03/2015 (5)	23:43:53.930000	23.746	11625_TRA_Data, 23:43:54 (23.7 sec)	0.378	0.012	0.0519	0.0018	0.56537			0.05262	0.00057	0.37611	0.0167	0.0011	no value	NAN	324.7	8.6	326	11	335	22	291	24	-2917	nan	-154	nan	-87	nan	631	nan	96	nan	147	nan	6	nan	19.2678	0.668248	551	nan	708845769788500	nan
Z_Plesovice_22	11626_TRA_Data	05/03/2015 (5) 23:45:17.25	05/03/2015 (5)	23:45:17.250000	25.426	11626_TRA_Data, 23:45:17 (25.4 sec)	0.392	0.012	0.0539	0.0018	0.5624			0.05272	0.00055	0.40742	0.0165	0.0011	no value	NAN	335.9	8.9	338	11	332	22	299	23	-2524	nan	-135	nan	-70	nan	599	nan	89	nan	135	nan	6	nan	18.5529	0.619577	41	nan	700409101696916	nan
Z_Plesovice_23	11645_TRA_Data	06/03/2015 (6) 00:11:52.36	06/03/2015 (6)	00:11:52.360000	25.325	11645_TRA_Data, 00:11:52 (25.3 sec)	0.393	0.012	0.0538	0.0018	0.50052			0.05296	0.00059	0.37224	0.0166	0.0011	no value	NAN	335.5	8.8	338	11	332	22	303	25	-2693	nan	-144	nan	-79	nan	625	nan	96	nan	142	nan	6	nan	18.5874	0.621882	47	nan	729058615246478	nan
Z_Plesovice_24	11646_TRA_Data	06/03/2015 (6) 00:13:18.15	06/03/2015 (6)	00:13:18.150000	21.528	11646_TRA_Data, 00:13:18 (21.5 sec)	0.386	0.012	0.0525	0.0018	0.54054			0.05305	0.00059	0.41577	0.0167	0.0011	no value	NAN	330.2	8.7	330	11	335	22	308	24	-2762	nan	-146	nan	-75	nan	596	nan	91	nan	139	nan	6	nan	19.0476	0.653061	30	nan	677290662236460	nan
Z_Plesovice_25	11665_TRA_Data	06/03/2015 (6) 00:39:52.18	06/03/2015 (6)	00:39:52.180000	26.501	11665_TRA_Data, 00:39:52 (26.5 sec)	0.399	0.012	0.0547	0.0019	0.50065			0.05278	0.00055	0.37828	0.0168	0.0011	no value	NAN	340.1	8.8	343	11	337	22	298	23	16881	nan	888	nan	506	nan	639	nan	99	nan	150	nan	6	nan	18.2815	0.635008	19	nan	760378226726673	nan
Z_Plesovice_26	11666_TRA_Data	06/03/2015 (6) 00:41:16.05	06/03/2015 (6)	00:41:16.050000	25.627	11666_TRA_Data, 00:41:16 (25.6 sec)	0.4	0.012	0.0543	0.0018	0.49543			0.05329	0.00058	0.39952	0.0168	0.0011	no value	NAN	340.6	8.9	341	11	337	22	313	24	13889	nan	747	nan	411	nan	615	nan	95	nan	144	nan	6	nan	18.4162	0.610482	54	nan	726114276983343	nan
Z_Plesovice_27	11685_TRA_Data	06/03/2015 (6) 01:07:56.00	06/03/2015 (6)	01:07:56	23.678	11685_TRA_Data, 01:07:56 (23.6 sec)	0.379	0.012	0.0516	0.0017	0.46493			0.053	0.00055	0.43462	0.01547	0.00099	no value	NAN	326	8.6	324	11	310	20	309	23	-213442	nan	-11317	nan	-8401	nan	827	nan	185	nan	271	nan	4	nan	19.3798	0.638483	85	nan	942348359690806	nan
Z_Plesovice_28	11686_TRA_Data	06/03/2015 (6) 01:09:19.22	06/03/2015 (6)	01:09:19.220000	25.459	11686_TRA_Data, 01:09:19 (25.4 sec)	0.394	0.012	0.0543	0.0018	0.5346			0.05273	0.00055	0.36766	0.0162	0.0011	no value	NAN	336.8	8.8	341	11	325	21	299	23	-90067	nan	-4841	nan	-2710	nan	633	nan	99	nan	151	nan	6	nan	18.4162	0.610482	33	nan	744781852731121	nan
Z_Plesovice_29	11705_TRA_Data	06/03/2015 (6) 01:35:59.09	06/03/2015 (6)	01:35:59.090000	25.594	11705_TRA_Data, 01:35:59 (25.5 sec)	0.395	0.012	0.054	0.0018	0.50488			0.05309	0.00059	0.38724	0.0164	0.0011	no value	NAN	337	8.9	339	11	329	22	309	24	7444	nan	397	nan	211	nan	559	nan	83	nan	129	nan	7	nan	18.5185	0.617284	71	nan	650990640916760	nan
Z_Plesovice_30	11706_TRA_Data	06/03/2015 (6) 01:37:21.99	06/03/2015 (6)	01:37:21.990000	24.686	11706_TRA_Data, 01:37:22 (24.6 sec)	0.39	0.012	0.0533	0.0018	0.53519			0.05312	0.00056	0.43558	0.0158	0.001	no value	NAN	333.6	8.7	334	11	316	20	312	23	7988	nan	426	nan	275	nan	764	nan	155	nan	228	nan	5	nan	18.7617	0.633604	59	nan	891991323333557	nan
Z_Plesovice_31	11725_TRA_Data	06/03/2015 (6) 02:04:00.30	06/03/2015 (6)	02:04:00.300000	24.384	11725_TRA_Data, 02:04:00 (24.3 sec)	0.386	0.012	0.0524	0.0018	0.35547			0.05333	0.00065	0.41974	0.0159	0.0011	no value	NAN	331.5	8.9	329	11	319	21	319	27	2101	nan	110	nan	53	nan	484	nan	71	nan	106	nan	7	nan	19.084	0.655556	5	nan	550777603907200	nan
Z_Plesovice_32	11726_TRA_Data	06/03/2015 (6) 02:05:23.85	06/03/2015 (6)	02:05:23.850000	25.829	11726_TRA_Data, 02:05:24 (25.8 sec)	0.401	0.012	0.0548	0.0019	0.53689			0.05297	0.00056	0.36921	0.0163	0.0011	no value	NAN	341.7	9	344	11	327	22	307	24	2467	nan	130	nan	67	nan	537	nan	79	nan	119	nan	7	nan	18.2482	0.632692	28	nan	636828894254421	nan
Z_Plesovice_33	11765_TRA_Data	06/03/2015 (6) 03:00:02.25	06/03/2015 (6)	03:00:02.250000	25.426	11765_TRA_Data, 03:00:02 (25.4 sec)	0.395	0.012	0.0544	0.0018	0.36981			0.05261	0.00068	0.35986	0.0163	0.0011	no value	NAN	337	9	341	11	326	23	279	28	1402	nan	75	nan	39	nan	372	nan	54	nan	80	nan	7	nan	18.3823	0.60824	33	nan	439349886076157	nan
Z_Plesovice_34	11766_TRA_Data	06/03/2015 (6) 03:01:25.29	06/03/2015 (6)	03:01:25.290000	25.392	11766_TRA_Data, 03:01:25 (25.3 sec)	0.389	0.012	0.053	0.0018	0.3406			0.05316	0.00066	0.40416	0.0162	0.0011	no value	NAN	332.7	8.8	333	11	326	22	308	27	1532	nan	82	nan	40	nan	442	nan	65	nan	96	nan	7	nan	18.8679	0.640797	81	nan	508742444780597	nan
Z_Plesovice_35	11785_TRA_Data	06/03/2015 (6) 03:28:03.63	06/03/2015 (6)	03:28:03.630000	24.048	11785_TRA_Data, 03:28:04 (24 sec)	0.377	0.012	0.0518	0.0018	0.49345			0.05285	0.00063	0.40407	0.0162	0.0011	no value	NAN	323.9	8.7	325	11	325	21	299	26	4482	nan	240	nan	131	nan	606	nan	89	nan	132	nan	7	nan	19.305	0.670831	63	nan	672426493498129	nan
Z_Plesovice_36	11786_TRA_Data	06/03/2015 (6) 03:29:27.33	06/03/2015 (6)	03:29:27.330000	24.35	11786_TRA_Data, 03:29:27 (24.3 sec)	0.383	0.012	0.052	0.0018	0.56213			0.05324	0.00059	0.35135	0.0162	0.0011	no value	NAN	328.4	8.7	326	11	325	21	321	25	4471	nan	242	nan	124	nan	594	nan	86	nan	129	nan	7	nan	19.2308	0.665681	-19	nan	666834167202878	nan
Z_Plesovice_37	11805_TRA_Data	06/03/2015 (6) 03:56:13.93	06/03/2015 (6)	03:56:13.930000	24.754	11805_TRA_Data, 03:56:14 (24.7 sec)	0.389	0.012	0.0531	0.0018	0.16774			0.05292	0.00061	0.037158	0.0162	0.0011	no value	NAN	332.5	8.8	334	11	324	21	297	24	-3635	nan	-195	nan	-97	nan	584	nan	86	nan	128	nan	7	nan	18.8324	0.638386	51	nan	672456008782018	nan
Z_Plesovice_38	11806_TRA_Data	06/03/2015 (6) 03:57:36.36	06/03/2015 (6)	03:57:36.360000	24.317	11806_TRA_Data, 03:57:36 (24.3 sec)	0.382	0.012	0.0521	0.0018	0.52701			0.05313	0.00064	0.37066	0.0167	0.0011	no value	NAN	327.8	8.8	327	11	334	22	306	26	-3049	nan	-162	nan	-90	nan	593	nan	86	nan	133	nan	7	nan	19.1939	0.663127	59	nan	667196102168582	nan
Z_Plesovice_39	11825_TRA_Data	06/03/2015 (6) 04:24:10.96	06/03/2015 (6)	04:24:10.960000	24.72	11825_TRA_Data, 04:24:11 (24.7 sec)	0.385	0.012	0.0528	0.0018	0.48096			0.05292	0.00064	0.44195	0.0163	0.0011	no value	NAN	329.9	8.8	331	11	328	22	296	26	-17161	nan	-916	nan	-483	nan	594	nan	89	nan	132	nan	7	nan	18.9394	0.645661	86	nan	679654550942604	nan
Z_Plesovice_40	11826_TRA_Data	06/03/2015 (6) 04:25:34.09	06/03/2015 (6)	04:25:34.090000	25.594	11826_TRA_Data, 04:25:34 (25.5 sec)	0.392	0.012	0.0534	0.0018	0.52738			0.05304	0.0006	0.36687	0.0162	0.0011	no value	NAN	334.9	8.9	336	11	325	21	311	25	-18849	nan	-1029	nan	-511	nan	578	nan	86	nan	128	nan	7	nan	18.7266	0.631233	-22	nan	669236955933592	nan
Z_Plesovice_41	11845_TRA_Data	06/03/2015 (6) 04:52:07.07	06/03/2015 (6)	04:52:07.070000	23.611	11845_TRA_Data, 04:52:07 (23.6 sec)	0.385	0.012	0.052	0.0018	0.5379			0.05346	0.00061	0.36279	0.0165	0.0011	no value	NAN	329.8	8.8	327	11	331	22	322	25	3388	nan	182	nan	97	nan	601	nan	90	nan	139	nan	6	nan	19.2308	0.665681	14	nan	675020381383331	nan
Z_Plesovice_42	11846_TRA_Data	06/03/2015 (6) 04:53:30.02	06/03/2015 (6)	04:53:30.020000	25.661	11846_TRA_Data, 04:53:30 (25.6 sec)	0.391	0.012	0.0534	0.0018	0.51579			0.05281	0.00059	0.3989	0.0164	0.0011	no value	NAN	334.1	8.9	335	11	329	22	298	25	3596	nan	193	nan	101	nan	593	nan	88	nan	133	nan	7	nan	18.7266	0.631233	54	nan	689328816410731	nan
Z_Plesovice_43	11865_TRA_Data	06/03/2015 (6) 05:20:06.59	06/03/2015 (6)	05:20:06.590000	25.09	11865_TRA_Data, 05:20:07 (25 sec)	0.385	0.012	0.0529	0.0018	0.54583			0.05263	0.00059	0.34546	0.0161	0.0011	no value	NAN	330.1	8.8	332	11	323	21	292	25	1348	nan	73	nan	37	nan	604	nan	91	nan	134	nan	6	nan	18.9036	0.643222	71	nan	688486364261328	nan
Z_Plesovice_44	11866_TRA_Data	06/03/2015 (6) 05:21:29.69	06/03/2015 (6)	05:21:29.690000	24.989	11866_TRA_Data, 05:21:30 (24.9 sec)	0.385	0.012	0.0528	0.0018	0.4783			0.05282	0.00061	0.40589	0.0163	0.0011	no value	NAN	329.4	8.7	331	11	326	21	297	26	1267	nan	68	nan	34	nan	586	nan	87	nan	129	nan	7	nan	18.9394	0.645661	333	nan	665144264360818	nan
Z_Plesovice_45	11885_TRA_Data	06/03/2015 (6) 05:48:04.63	06/03/2015 (6)	05:48:04.630000	24.048	11885_TRA_Data, 05:48:05 (24 sec)	0.381	0.012	0.0519	0.0018	0.50059			0.05305	0.00064	0.44701	0.0162	0.0011	no value	NAN	326.5	8.7	326	11	324	21	305	26	1393	nan	74	nan	40	nan	612	nan	92	nan	137	nan	6	nan	19.2678	0.668248	46	nan	686174775277783	nan
Z_Plesovice_46	11886_TRA_Data	06/03/2015 (6) 05:49:28.49	06/03/2015 (6)	05:49:28.490000	25.19	11886_TRA_Data, 05:49:28 (25.1 sec)	0.391	0.012	0.0531	0.0018	0.52043			0.05334	0.00059	0.39414	0.0168	0.0011	no value	NAN	334.6	8.8	333	11	335	22	315	24	1057	nan	57	nan	28	nan	581	nan	86	nan	131	nan	6	nan	18.8324	0.638386	31	nan	668139623291726	nan
Z_Plesovice_47	11905_TRA_Data	06/03/2015 (6) 06:16:01.96	06/03/2015 (6)	06:16:01.960000	24.72	11905_TRA_Data, 06:16:02 (24.7 sec)	0.386	0.012	0.0526	0.0018	0.52794			0.05283	0.0006	0.41949	0.0169	0.0011	no value	NAN	330.3	8.7	331	11	338	22	301	25	5581	nan	301	nan	164	nan	615	nan	93	nan	140	nan	6	nan	19.0114	0.650581	30	nan	701355249357644	nan
Z_Plesovice_48	11906_TRA_Data	06/03/2015 (6) 06:17:24.33	06/03/2015 (6)	06:17:24.330000	24.35	11906_TRA_Data, 06:17:24 (24.3 sec)	0.387	0.012	0.0522	0.0018	0.50454			0.05373	0.00064	0.51534	0.0167	0.0011	no value	NAN	331.3	8.9	328	11	335	22	330	26	5232	nan	284	nan	150	nan	609	nan	92	nan	140	nan	6	nan	19.1571	0.660589	104	nan	685153800933699	nan
Z_Plesovice_49	11925_TRA_Data	06/03/2015 (6) 06:43:59.95	06/03/2015 (6)	06:43:59.950000	25.728	11925_TRA_Data, 06:44:00 (25.7 sec)	0.398	0.012	0.0537	0.0018	0.49002			0.05373	0.00062	0.40091	0.0176	0.0011	no value	NAN	338.9	8.9	337	11	352	23	333	25	1123	nan	61	nan	32	nan	596	nan	90	nan	138	nan	6	nan	18.622	0.6242	-2	nan	700374737504989	nan
Z_Plesovice_50	11926_TRA_Data	06/03/2015 (6) 06:45:23.32	06/03/2015 (6)	06:45:23.320000	25.358	11926_TRA_Data, 06:45:23 (25.3 sec)	0.393	0.012	0.0535	0.0018	0.55017			0.05299	0.00057	0.33905	0.0171	0.0011	no value	NAN	335.6	8.9	336	11	342	22	309	24	1165	nan	61	nan	32	nan	588	nan	89	nan	133	nan	6	nan	18.6916	0.628876	49	nan	683780408941180	nan
Z_Plesovice_51	11945_TRA_Data	06/03/2015 (6) 07:11:57.76	06/03/2015 (6)	07:11:57.760000	24.922	11945_TRA_Data, 07:11:58 (24.9 sec)	0.388	0.012	0.0526	0.0018	0.50848			0.05347	0.0006	0.36426	0.0168	0.0011	no value	NAN	332.4	8.9	330	11	337	22	326	25	1339	nan	72	nan	39	nan	625	nan	96	nan	144	nan	6	nan	19.0114	0.650581	82	nan	712912986035512	nan
Z_Plesovice_52	11946_TRA_Data	06/03/2015 (6) 07:13:20.73	06/03/2015 (6)	07:13:20.730000	23.947	11946_TRA_Data, 07:13:21 (23.9 sec)	0.374	0.012	0.0509	0.0017	0.52294			0.05307	0.00061	0.37544	0.0171	0.0011	no value	NAN	322	8.6	320	11	342	23	311	25	1376	nan	74	nan	40	nan	622	nan	93	nan	141	nan	6	nan	19.6464	0.656165	-1	nan	685824210889701	nan
Z_Plesovice_53	11965_TRA_Data	06/03/2015 (6) 07:39:52.30	06/03/2015 (6)	07:39:52.300000	24.384	11965_TRA_Data, 07:39:52 (24.3 sec)	0.38	0.012	0.0517	0.0018	0.50976			0.05324	0.0006	0.39336	0.0162	0.0011	no value	NAN	326.1	8.6	325	11	324	21	315	25	1014	nan	55	nan	33	nan	646	nan	103	nan	159	nan	6	nan	19.3424	0.673428	79	nan	725591751058459	nan
Z_Plesovice_54	11966_TRA_Data	06/03/2015 (6) 07:41:15.99	06/03/2015 (6)	07:41:15.990000	25.694	11966_TRA_Data, 07:41:16 (25.6 sec)	0.386	0.012	0.0528	0.0018	0.56079			0.05312	0.00059	0.35038	0.0162	0.0011	no value	NAN	330.7	8.8	332	11	325	21	310	24	1053	nan	58	nan	30	nan	607	nan	92	nan	139	nan	6	nan	18.9394	0.645661	67	nan	695964061854007	nan
Z_Plesovice_55	11985_TRA_Data	06/03/2015 (6) 08:07:46.85	06/03/2015 (6)	08:07:46.850000	25.829	11985_TRA_Data, 08:07:47 (25.8 sec)	0.391	0.012	0.0532	0.0018	0.54533			0.05296	0.00056	0.35404	0.0162	0.0011	no value	NAN	334.6	9	334	11	324	21	310	23	622	nan	34	nan	20	nan	640	nan	104	nan	160	nan	6	nan	18.797	0.635988	4	nan	746761834201088	nan
Z_Plesovice_56	11986_TRA_Data	06/03/2015 (6) 08:09:10.52	06/03/2015 (6)	08:09:10.520000	25.157	11986_TRA_Data, 08:09:11 (25.1 sec)	0.386	0.012	0.0527	0.0018	0.48915			0.05311	0.00058	0.41128	0.0161	0.001	no value	NAN	331	8.8	331	11	322	21	309	24	598	nan	32	nan	23	nan	684	nan	128	nan	203	nan	5	nan	18.9753	0.648114	76	nan	787280920022897	nan
Z_Plesovice_57	12002_TRA_Data	06/03/2015 (6) 08:31:32.21	06/03/2015 (6)	08:31:32.210000	26.467	12002_TRA_Data, 08:31:32 (26.4 sec)	0.399	0.012	0.0545	0.0018	0.38475			0.05298	0.00063	0.43306	0.0165	0.0011	no value	NAN	339.7	8.9	342	11	330	22	302	26	122	nan	7	nan	3	nan	466	nan	66	nan	100	nan	7	nan	18.3486	0.60601	58	nan	550500835855456	nan
Z_Plesovice_58	12003_TRA_Data	06/03/2015 (6) 08:32:55.48	06/03/2015 (6)	08:32:55.480000	26.198	12003_TRA_Data, 08:32:55 (26.1 sec)	0.395	0.012	0.0538	0.0018	0.48616			0.05327	0.00061	0.42275	0.0166	0.0011	no value	NAN	337.3	8.8	338	11	333	22	317	26	98	nan	6	nan	3	nan	564	nan	83	nan	131	nan	6	nan	18.5874	0.621882	59	nan	660334490116001	nan
Z_91500_1	11421_TRA_Data	05/03/2015 (5) 18:59:13.83	05/03/2015 (5)	18:59:13.830000	24.854	11421_TRA_Data, 18:59:14 (24.8 sec)	1.872	0.061	0.1801	0.0062	0.27259			0.0755	0.0012	0.47165	0.0526	0.0035	no value	NAN	1066	21	1067	34	1033	66	1034	34	-89	nan	-7	nan	-9	nan	49	nan	26	nan	132	nan	2	nan	5.55247	0.191146	-20	nan	212551675284787	nan
Z_91500_2	11422_TRA_Data	05/03/2015 (5) 19:00:35.83	05/03/2015 (5)	19:00:35.830000	24.854	11422_TRA_Data, 19:00:36 (24.8 sec)	1.855	0.059	0.1816	0.0063	0.32635			0.0747	0.0012	0.44733	0.0528	0.0035	no value	NAN	1060	21	1074	34	1037	67	1009	33	-75	nan	-6	nan	-8	nan	49	nan	26	nan	133	nan	2	nan	5.50661	0.191033	-26	nan	213296809930574	nan
Z_91500_3	11441_TRA_Data	05/03/2015 (5) 19:27:04.86	05/03/2015 (5)	19:27:04.860000	24.821	11441_TRA_Data, 19:27:05 (24.8 sec)	1.841	0.06	0.1786	0.0062	0.34898			0.0752	0.0012	0.44761	0.0546	0.0036	no value	NAN	1052	22	1058	34	1071	69	1022	33	-174	nan	-13	nan	-17	nan	50	nan	27	nan	134	nan	2	nan	5.5991	0.19437	-13	nan	214394479479099	nan
Z_91500_4	11442_TRA_Data	05/03/2015 (5) 19:28:27.23	05/03/2015 (5)	19:28:27.230000	24.451	11442_TRA_Data, 19:28:27 (24.4 sec)	1.856	0.061	0.1814	0.0063	0.345			0.0742	0.0012	0.37755	0.0552	0.0036	no value	NAN	1056	22	1074	34	1083	69	995	35	-201	nan	-15	nan	-20	nan	49	nan	26	nan	133	nan	2	nan	5.51268	0.191455	-45	nan	211203961109436	nan
Z_91500_5	11461_TRA_Data	05/03/2015 (5) 19:54:56.86	05/03/2015 (5)	19:54:56.860000	24.821	11461_TRA_Data, 19:54:57 (24.8 sec)	1.885	0.061	0.1797	0.0062	0.28863			0.0763	0.0012	0.43464	0.0566	0.0037	no value	NAN	1068	21	1064	34	1110	71	1049	33	-284	nan	-22	nan	-29	nan	52	nan	29	nan	144	nan	2	nan	5.56483	0.191997	-23	nan	222865207935199	nan
Z_91500_6	11462_TRA_Data	05/03/2015 (5) 19:56:19.16	05/03/2015 (5)	19:56:19.160000	24.518	11462_TRA_Data, 19:56:19 (24.5 sec)	1.846	0.06	0.1797	0.0062	0.28023			0.0744	0.0012	0.39861	0.0561	0.0037	no value	NAN	1053	21	1066	34	1101	71	1000	34	-267	nan	-20	nan	-28	nan	51	nan	28	nan	142	nan	2	nan	5.56483	0.191997	-24	nan	221153225556172	nan
Z_91500_7	11481_TRA_Data	05/03/2015 (5) 20:22:51.12	05/03/2015 (5)	20:22:51.120000	25.56	11481_TRA_Data, 20:22:51 (25.5 sec)	1.873	0.061	0.1846	0.0063	0.28714			0.074	0.0012	0.4095	0.0576	0.0038	no value	NAN	1063	22	1091	35	1129	72	971	35	-205	nan	-15	nan	-19	nan	51	nan	27	nan	142	nan	2	nan	5.41712	0.184875	-30	nan	226076955644125	nan
Z_91500_8	11482_TRA_Data	05/03/2015 (5) 20:24:13.62	05/03/2015 (5)	20:24:13.620000	26.064	11482_TRA_Data, 20:24:14 (26 sec)	1.911	0.061	0.1863	0.0064	0.30665			0.0752	0.0012	0.46476	0.0559	0.0037	no value	NAN	1079	21	1100	35	1096	70	1018	32	-208	nan	-15	nan	-20	nan	51	nan	27	nan	136	nan	2	nan	5.36769	0.184397	-23	nan	227590352845451	nan
Z_91500_9	11501_TRA_Data	05/03/2015 (5) 20:50:44.09	05/03/2015 (5)	20:50:44.090000	24.586	11501_TRA_Data, 20:50:44 (24.5 sec)	1.867	0.06	0.1793	0.0062	0.24177			0.0756	0.0012	0.46966	0.0551	0.0036	no value	NAN	1063	21	1061	34	1080	69	1038	34	-141	nan	-11	nan	-14	nan	53	nan	29	nan	150	nan	2	nan	5.57724	0.192855	-3	nan	228297627328840	nan
Z_91500_10	11502_TRA_Data	05/03/2015 (5) 20:52:07.20	05/03/2015 (5)	20:52:07.200000	24.485	11502_TRA_Data, 20:52:07 (24.4 sec)	1.836	0.059	0.1803	0.0062	0.32627			0.0739	0.0012	0.42943	0.0536	0.0035	no value	NAN	1051	21	1068	34	1051	67	987	33	-155	nan	-11	nan	-14	nan	53	nan	29	nan	146	nan	2	nan	5.54631	0.190722	-43	nan	231073004866294	nan
Z_91500_11	11521_TRA_Data	05/03/2015 (5) 21:18:38.52	05/03/2015 (5)	21:18:38.520000	25.157	11521_TRA_Data, 21:18:39 (25.1 sec)	1.881	0.061	0.1824	0.0063	0.36009			0.0752	0.0012	0.47133	0.0555	0.0037	no value	NAN	1068	22	1078	34	1089	70	1029	33	-251	nan	-19	nan	-25	nan	52	nan	27	nan	140	nan	2	nan	5.48246	0.189361	-36	nan	227012147952721	nan
Z_91500_12	11522_TRA_Data	05/03/2015 (5) 21:20:01.46	05/03/2015 (5)	21:20:01.460000	25.224	11522_TRA_Data, 21:20:01 (25.2 sec)	1.855	0.059	0.1815	0.0063	0.30588			0.0747	0.0012	0.48413	0.0551	0.0037	no value	NAN	1061	22	1073	34	1083	70	1015	33	-240	nan	-18	nan	-23	nan	51	nan	28	nan	140	nan	2	nan	5.50964	0.191244	-53	nan	224892809364420	nan
Z_91500_13	11541_TRA_Data	05/03/2015 (5) 21:46:34.75	05/03/2015 (5)	21:46:34.750000	25.93	11541_TRA_Data, 21:46:35 (25.9 sec)	1.897	0.061	0.1852	0.0063	0.33983			0.0745	0.0011	0.38311	0.0566	0.0037	no value	NAN	1074	22	1095	35	1110	71	1009	31	-310	nan	-23	nan	-32	nan	51	nan	28	nan	144	nan	2	nan	5.39957	0.183679	-39	nan	228609174500399	nan
Z_91500_14	11542_TRA_Data	05/03/2015 (5) 21:47:57.72	05/03/2015 (5)	21:47:57.720000	24.955	11542_TRA_Data, 21:47:58 (24.9 sec)	1.894	0.061	0.181	0.0062	0.31026			0.0763	0.0012	0.42069	0.0559	0.0037	no value	NAN	1072	22	1071	34	1097	70	1049	32	-355	nan	-27	nan	-37	nan	52	nan	29	nan	146	nan	2	nan	5.52486	0.189249	-39	nan	227139336078106	nan
Z_91500_15	11561_TRA_Data	05/03/2015 (5) 22:14:31.31	05/03/2015 (5)	22:14:31.310000	26.366	11561_TRA_Data, 22:14:31 (26.3 sec)	1.927	0.062	0.1864	0.0064	0.013223			0.0754	0.0013	0.042006	0.0561	0.0037	no value	NAN	1080	21	1101	35	1102	70	1007	34	-562	nan	-44	nan	-58	nan	51	nan	29	nan	143	nan	2	nan	5.36481	0.184199	-52	nan	230634865787384	nan
Z_91500_16	11562_TRA_Data	05/03/2015 (5) 22:15:53.67	05/03/2015 (5)	22:15:53.670000	24.014	11562_TRA_Data, 22:15:54 (24 sec)	1.859	0.06	0.1798	0.0062	0.31164			0.0753	0.0012	0.45097	0.0547	0.0036	no value	NAN	1062	21	1064	34	1074	69	1040	31	-659	nan	-50	nan	-67	nan	54	nan	30	nan	152	nan	2	nan	5.56173	0.191784	-21	nan	232508327388293	nan
Z_91500_17	11581_TRA_Data	05/03/2015 (5) 22:42:26.92	05/03/2015 (5)	22:42:26.920000	25.762	11581_TRA_Data, 22:42:27 (25.7 sec)	1.911	0.061	0.1852	0.0064	0.2945			0.0751	0.0012	0.44107	0.0573	0.0037	no value	NAN	1079	21	1094	34	1122	71	1024	32	-560	nan	-42	nan	-58	nan	53	nan	30	nan	156	nan	2	nan	5.39957	0.186594	-35	nan	238604188414866	nan
Z_91500_18	11582_TRA_Data	05/03/2015 (5) 22:43:50.25	05/03/2015 (5)	22:43:50.250000	25.426	11582_TRA_Data, 22:43:50 (25.4 sec)	1.903	0.061	0.1839	0.0063	0.37964			0.0752	0.0011	0.37634	0.0565	0.0037	no value	NAN	1075	22	1087	34	1107	70	1029	31	-594	nan	-44	nan	-63	nan	54	nan	30	nan	156	nan	2	nan	5.43774	0.186285	-28	nan	239385999974900	nan
Z_91500_19	11601_TRA_Data	05/03/2015 (5) 23:10:21.83	05/03/2015 (5)	23:10:21.830000	24.854	11601_TRA_Data, 23:10:22 (24.8 sec)	1.877	0.061	0.1822	0.0063	0.37046			0.0748	0.0012	0.40736	0.0559	0.0036	no value	NAN	1065	21	1078	34	1097	70	1016	33	-728	nan	-53	nan	-73	nan	55	nan	31	nan	160	nan	2	nan	5.48847	0.189777	-48	nan	241429594949504	nan
Z_91500_20	11602_TRA_Data	05/03/2015 (5) 23:11:44.23	05/03/2015 (5)	23:11:44.230000	24.451	11602_TRA_Data, 23:11:44 (24.4 sec)	1.866	0.061	0.1813	0.0062	0.33013			0.0748	0.0012	0.40685	0.0553	0.0036	no value	NAN	1063	21	1073	34	1085	69	1010	33	-834	nan	-62	nan	-84	nan	55	nan	32	nan	158	nan	2	nan	5.51572	0.188624	-35	nan	241965971634366	nan
Z_91500_21	11621_TRA_Data	05/03/2015 (5) 23:38:18.16	05/03/2015 (5)	23:38:18.160000	24.518	11621_TRA_Data, 23:38:18 (24.5 sec)	1.864	0.061	0.1801	0.0062	0.34249			0.075	0.0012	0.39885	0.0548	0.0036	no value	NAN	1059	21	1066	34	1075	69	1020	33	-1479	nan	-111	nan	-145	nan	54	nan	30	nan	148	nan	2	nan	5.55247	0.191146	-19	nan	233801884337208	nan
Z_91500_22	11622_TRA_Data	05/03/2015 (5) 23:39:40.40	05/03/2015 (5)	23:39:40.400000	24.283	11622_TRA_Data, 23:39:40 (24.2 sec)	1.878	0.061	0.179	0.0062	0.29834			0.076	0.0012	0.43354	0.0545	0.0036	no value	NAN	1065	22	1060	34	1070	68	1051	34	-1069	nan	-82	nan	-99	nan	55	nan	30	nan	151	nan	2	nan	5.58659	0.193502	-14	nan	237129886128097	nan
Z_91500_23	11641_TRA_Data	06/03/2015 (6) 00:06:15.83	06/03/2015 (6)	00:06:15.830000	24.854	11641_TRA_Data, 00:06:16 (24.8 sec)	1.867	0.061	0.1824	0.0063	0.3279			0.0746	0.0012	0.42003	0.0548	0.0036	no value	NAN	1062	22	1078	34	1075	69	1006	33	-716	nan	-54	nan	-71	nan	51	nan	28	nan	139	nan	2	nan	5.48246	0.189361	-39	nan	222111439382973	nan
Z_91500_24	11642_TRA_Data	06/03/2015 (6) 00:07:38.13	06/03/2015 (6)	00:07:38.130000	24.552	11642_TRA_Data, 00:07:38 (24.5 sec)	1.878	0.061	0.1818	0.0063	0.31026			0.0756	0.0013	0.43558	0.0542	0.0036	no value	NAN	1067	22	1075	34	1066	69	1026	34	-658	nan	-50	nan	-61	nan	50	nan	27	nan	135	nan	2	nan	5.50055	0.190613	-15	nan	218137839149891	nan
Z_91500_25	11661_TRA_Data	06/03/2015 (6) 00:34:16.03	06/03/2015 (6)	00:34:16.030000	24.653	11661_TRA_Data, 00:34:16 (24.6 sec)	1.876	0.06	0.1811	0.0063	0.36129			0.0752	0.0011	0.42571	0.0554	0.0036	no value	NAN	1065	22	1071	34	1089	69	1030	31	16567	nan	1285	nan	1807	nan	59	nan	34	nan	168	nan	2	nan	5.52181	0.192089	-27	nan	255440639797214	nan
Z_91500_26	11662_TRA_Data	06/03/2015 (6) 00:35:38.89	06/03/2015 (6)	00:35:38.890000	24.787	11662_TRA_Data, 00:35:39 (24.7 sec)	1.896	0.061	0.181	0.0062	0.28343			0.0762	0.0012	0.44265	0.0537	0.0035	no value	NAN	1072	22	1071	34	1054	67	1051	32	8912	nan	686	nan	909	nan	58	nan	33	nan	162	nan	2	nan	5.52486	0.189249	-29	nan	250702282871674	nan
Z_91500_27	11681_TRA_Data	06/03/2015 (6) 01:02:17.42	06/03/2015 (6)	01:02:17.420000	25.258	11681_TRA_Data, 01:02:17 (25.2 sec)	1.87	0.06	0.1848	0.0063	0.31539			0.0738	0.0012	0.37101	0.0532	0.0035	no value	NAN	1063	22	1092	35	1044	67	985	32	12260	nan	893	nan	1268	nan	57	nan	32	nan	161	nan	2	nan	5.41125	0.184475	-43	nan	252417601302080	nan
Z_91500_28	11682_TRA_Data	06/03/2015 (6) 01:03:40.79	06/03/2015 (6)	01:03:40.790000	24.888	11682_TRA_Data, 01:03:41 (24.8 sec)	1.859	0.059	0.1819	0.0063	0.28047			0.0748	0.0012	0.47229	0.0535	0.0035	no value	NAN	1061	21	1075	34	1050	67	1009	33	14987	nan	1130	nan	1526	nan	58	nan	33	nan	165	nan	2	nan	5.49753	0.190404	-22	nan	252413005713375	nan
Z_91500_29	11701_TRA_Data	06/03/2015 (6) 01:30:21.73	06/03/2015 (6)	01:30:21.730000	23.947	11701_TRA_Data, 01:30:22 (23.9 sec)	1.848	0.06	0.1802	0.0062	0.032965			0.0746	0.0012	0.082944	0.0526	0.0034	no value	NAN	1054	21	1067	34	1034	66	1001	32	10412	nan	799	nan	1192	nan	59	nan	35	nan	173	nan	2	nan	5.54939	0.190934	-34	nan	258993388473337	nan
Z_91500_30	11702_TRA_Data	06/03/2015 (6) 01:31:44.39	06/03/2015 (6)	01:31:44.390000	25.291	11702_TRA_Data, 01:31:44 (25.2 sec)	1.907	0.061	0.1829	0.0063	0.37621			0.0761	0.0011	0.40371	0.0516	0.0034	no value	NAN	1078	22	1082	34	1015	65	1056	29	5934	nan	450	nan	553	nan	59	nan	34	nan	168	nan	2	nan	5.46747	0.188327	-24	nan	259668012361914	nan
Z_91500_31	11721_TRA_Data	06/03/2015 (6) 01:58:23.52	06/03/2015 (6)	01:58:23.520000	25.157	11721_TRA_Data, 01:58:24 (25.1 sec)	1.912	0.062	0.182	0.0063	0.29659			0.0766	0.0012	0.46455	0.0526	0.0035	no value	NAN	1077	21	1077	34	1033	66	1055	33	862	nan	67	nan	88	nan	53	nan	30	nan	147	nan	2	nan	5.49451	0.190194	-24	nan	231293316965697	nan
Z_91500_32	11722_TRA_Data	06/03/2015 (6) 01:59:46.66	06/03/2015 (6)	01:59:46.660000	25.022	11722_TRA_Data, 01:59:47 (25 sec)	1.876	0.061	0.1806	0.0062	0.25753			0.076	0.0013	0.45975	0.053	0.0035	no value	NAN	1066	22	1071	34	1041	67	1034	35	845	nan	64	nan	83	nan	53	nan	29	nan	147	nan	2	nan	5.5371	0.190089	-32	nan	229144881611039	nan
Z_91500_33	11761_TRA_Data	06/03/2015 (6) 02:54:24.95	06/03/2015 (6)	02:54:24.950000	25.728	11761_TRA_Data, 02:54:25 (25.7 sec)	1.933	0.062	0.187	0.0064	0.31168			0.0754	0.0012	0.44203	0.0543	0.0036	no value	NAN	1085	22	1105	35	1067	69	1031	32	573	nan	43	nan	55	nan	53	nan	30	nan	149	nan	2	nan	5.34759	0.183019	-21	nan	237831183780071	nan
Z_91500_34	11762_TRA_Data	06/03/2015 (6) 02:55:48.16	06/03/2015 (6)	02:55:48.160000	24.518	11762_TRA_Data, 02:55:48 (24.5 sec)	1.833	0.059	0.1801	0.0062	0.267			0.0742	0.0012	0.44857	0.0531	0.0035	no value	NAN	1050	22	1066	34	1043	67	992	35	576	nan	43	nan	60	nan	54	nan	30	nan	149	nan	2	nan	5.55247	0.191146	-18	nan	235869855355728	nan
Z_91500_35	11781_TRA_Data	06/03/2015 (6) 03:22:27.23	06/03/2015 (6)	03:22:27.230000	24.451	11781_TRA_Data, 03:22:27 (24.4 sec)	1.852	0.06	0.1788	0.0062	0.26049			0.0758	0.0012	0.44924	0.0514	0.0034	no value	NAN	1059	21	1058	34	1012	65	1042	33	1206	nan	94	nan	128	nan	58	nan	34	nan	161	nan	2	nan	5.59284	0.193935	-28	nan	247768154619655	nan
Z_91500_36	11782_TRA_Data	06/03/2015 (6) 03:23:49.68	06/03/2015 (6)	03:23:49.680000	25.997	11782_TRA_Data, 03:23:50 (25.9 sec)	1.908	0.061	0.185	0.0063	0.25467			0.0754	0.0012	0.46535	0.0543	0.0035	no value	NAN	1077	22	1093	35	1065	68	1024	33	1146	nan	86	nan	127	nan	56	nan	33	nan	162	nan	2	nan	5.40541	0.184076	-35	nan	249938615756765	nan
Z_91500_37	11801_TRA_Data	06/03/2015 (6) 03:50:35.49	06/03/2015 (6)	03:50:35.490000	25.19	11801_TRA_Data, 03:50:35 (25.1 sec)	1.878	0.061	0.1826	0.0063	0.3456			0.075	0.0012	0.37791	0.0535	0.0035	no value	NAN	1068	22	1080	34	1055	68	1012	34	-1606	nan	-118	nan	-169	nan	58	nan	34	nan	167	nan	2	nan	5.47645	0.188947	-34	nan	255760473371880	nan
Z_91500_38	11802_TRA_Data	06/03/2015 (6) 03:51:58.86	06/03/2015 (6)	03:51:58.860000	24.821	11802_TRA_Data, 03:51:59 (24.8 sec)	1.859	0.06	0.1838	0.0063	0.31883			0.0737	0.0011	0.42393	0.0534	0.0035	no value	NAN	1061	21	1086	34	1050	67	988	32	-1478	nan	-107	nan	-156	nan	60	nan	35	nan	170	nan	2	nan	5.4407	0.186487	-27	nan	263626091570929	nan
Z_91500_39	11821_TRA_Data	06/03/2015 (6) 04:18:33.42	06/03/2015 (6)	04:18:33.420000	25.258	11821_TRA_Data, 04:18:33 (25.2 sec)	1.927	0.062	0.1829	0.0063	0.36501			0.0764	0.0011	0.39748	0.0536	0.0035	no value	NAN	1085	22	1083	35	1055	67	1067	31	-2017	nan	-154	nan	-228	nan	60	nan	36	nan	177	nan	2	nan	5.46747	0.188327	-24	nan	264873356552011	nan
Z_91500_40	11822_TRA_Data	06/03/2015 (6) 04:19:55.89	06/03/2015 (6)	04:19:55.890000	24.787	11822_TRA_Data, 04:19:56 (24.7 sec)	1.863	0.06	0.18	0.0062	0.38539			0.0753	0.0012	0.39286	0.0518	0.0034	no value	NAN	1061	22	1065	34	1019	65	1030	31	-2465	nan	-189	nan	-252	nan	61	nan	36	nan	174	nan	2	nan	5.55556	0.191358	-28	nan	264222846716542	nan
Z_91500_41	11841_TRA_Data	06/03/2015 (6) 04:46:30.36	06/03/2015 (6)	04:46:30.360000	25.325	11841_TRA_Data, 04:46:30 (25.3 sec)	1.881	0.06	0.1826	0.0063	0.37576			0.0749	0.0011	0.46636	0.0533	0.0035	no value	NAN	1067	21	1080	34	1050	67	1029	31	2050	nan	158	nan	231	nan	65	nan	38	nan	189	nan	2	nan	5.47645	0.188947	85	nan	284366379739971	nan
Z_91500_42	11842_TRA_Data	06/03/2015 (6) 04:47:53.49	06/03/2015 (6)	04:47:53.490000	25.19	11842_TRA_Data, 04:47:53 (25.1 sec)	1.872	0.06	0.1841	0.0063	0.33854			0.0738	0.0011	0.41663	0.0528	0.0034	no value	NAN	1064	21	1088	34	1037	66	996	31	1509	nan	107	nan	161	nan	64	nan	39	nan	189	nan	2	nan	5.43183	0.18588	-37	nan	284611851876638	nan
Z_91500_43	11861_TRA_Data	06/03/2015 (6) 05:14:29.99	06/03/2015 (6)	05:14:29.990000	24.686	11861_TRA_Data, 05:14:30 (24.6 sec)	1.849	0.059	0.1794	0.0062	0.27642			0.0751	0.0012	0.49953	0.052	0.0034	no value	NAN	1056	21	1063	34	1022	65	1018	33	871	nan	65	nan	91	nan	62	nan	37	nan	176	nan	2	nan	5.57414	0.19264	-30	nan	266705190487096	nan
Z_91500_44	11862_TRA_Data	06/03/2015 (6) 05:15:52.41	06/03/2015 (6)	05:15:52.410000	26.266	11862_TRA_Data, 05:15:52 (26.2 sec)	1.93	0.062	0.1864	0.0064	0.3403			0.0758	0.0012	0.43426	0.054	0.0035	no value	NAN	1086	22	1100	35	1063	68	1041	32	699	nan	52	nan	76	nan	60	nan	36	nan	178	nan	2	nan	5.36481	0.184199	-31	nan	271993369287745	nan
Z_91500_45	11881_TRA_Data	06/03/2015 (6) 05:42:28.72	06/03/2015 (6)	05:42:28.720000	24.955	11881_TRA_Data, 05:42:29 (24.9 sec)	1.848	0.059	0.1782	0.0061	0.32492			0.0753	0.0012	0.46906	0.0531	0.0035	no value	NAN	1055	21	1056	33	1043	66	1024	32	415	nan	32	nan	44	nan	62	nan	37	nan	177	nan	2	nan	5.61167	0.192094	-23	nan	267700839570083	nan
Z_91500_46	11882_TRA_Data	06/03/2015 (6) 05:43:51.96	06/03/2015 (6)	05:43:51.960000	24.72	11882_TRA_Data, 05:43:52 (24.7 sec)	1.866	0.06	0.1805	0.0062	0.34073			0.075	0.0011	0.40493	0.0525	0.0034	no value	NAN	1062	22	1069	34	1034	66	1024	31	414	nan	31	nan	44	nan	63	nan	38	nan	180	nan	2	nan	5.54017	0.190299	-32	nan	272301224356230	nan
Z_91500_47	11901_TRA_Data	06/03/2015 (6) 06:10:25.40	06/03/2015 (6)	06:10:25.400000	24.283	11901_TRA_Data, 06:10:25 (24.2 sec)	1.858	0.06	0.1801	0.0062	0.41034			0.0752	0.0012	0.3811	0.0533	0.0035	no value	NAN	1060	21	1066	34	1047	67	1028	31	1666	nan	129	nan	177	nan	64	nan	38	nan	185	nan	2	nan	5.55247	0.191146	-40	nan	278573304040653	nan
Z_91500_48	11902_TRA_Data	06/03/2015 (6) 06:11:47.86	06/03/2015 (6)	06:11:47.860000	24.821	11902_TRA_Data, 06:11:48 (24.8 sec)	1.819	0.058	0.1778	0.0061	0.32213			0.0747	0.0012	0.41606	0.054	0.0035	no value	NAN	1047	21	1053	33	1060	67	1011	32	1595	nan	120	nan	176	nan	64	nan	38	nan	186	nan	2	nan	5.6243	0.19296	-25	nan	275716365341222	nan
Z_91500_49	11921_TRA_Data	06/03/2015 (6) 06:38:22.83	06/03/2015 (6)	06:38:22.830000	24.854	11921_TRA_Data, 06:38:23 (24.8 sec)	1.877	0.061	0.1804	0.0062	0.35199			0.0757	0.0012	0.41181	0.0552	0.0036	no value	NAN	1067	22	1069	34	1084	69	1041	33	539	nan	39	nan	55	nan	59	nan	35	nan	172	nan	2	nan	5.54324	0.19051	-23	nan	260594603897092	nan
Z_91500_50	11922_TRA_Data	06/03/2015 (6) 06:39:46.10	06/03/2015 (6)	06:39:46.100000	23.578	11922_TRA_Data, 06:39:46 (23.5 sec)	1.814	0.058	0.1755	0.006	0.30942			0.0754	0.0012	0.44252	0.0554	0.0036	no value	NAN	1046	21	1041	33	1087	69	1026	33	453	nan	33	nan	48	nan	62	nan	36	nan	179	nan	2	nan	5.69801	0.194804	-24	nan	260376009154971	nan
Z_91500_51	11941_TRA_Data	06/03/2015 (6) 07:06:20.43	06/03/2015 (6)	07:06:20.430000	24.25	11941_TRA_Data, 07:06:20 (24.2 sec)	1.817	0.058	0.1766	0.0061	0.32735			0.0751	0.0012	0.4532	0.0538	0.0035	no value	NAN	1047	21	1047	33	1058	68	1027	32	470	nan	34	nan	48	nan	63	nan	38	nan	179	nan	2	nan	5.66251	0.195591	-17	nan	270968570610392	nan
Z_91500_52	11942_TRA_Data	06/03/2015 (6) 07:07:43.90	06/03/2015 (6)	07:07:43.900000	23.779	11942_TRA_Data, 07:07:44 (23.7 sec)	1.801	0.059	0.1748	0.006	0.44363			0.0746	0.0012	0.386	0.0549	0.0036	no value	NAN	1038	21	1037	33	1078	69	1011	32	490	nan	37	nan	52	nan	63	nan	37	nan	182	nan	2	nan	5.72082	0.196367	-19	nan	263888390062080	nan
Z_91500_53	11961_TRA_Data	06/03/2015 (6) 07:34:15.59	06/03/2015 (6)	07:34:15.590000	25.09	11961_TRA_Data, 07:34:16 (25 sec)	1.849	0.06	0.1812	0.0062	0.29727			0.0742	0.0012	0.3923	0.0531	0.0035	no value	NAN	1056	22	1072	34	1043	67	997	33	328	nan	25	nan	34	nan	61	nan	36	nan	177	nan	2	nan	5.51876	0.188832	-48	nan	269961439749102	nan
Z_91500_54	11962_TRA_Data	06/03/2015 (6) 07:35:37.62	06/03/2015 (6)	07:35:37.620000	25.056	11962_TRA_Data, 07:35:38 (25 sec)	1.871	0.06	0.1796	0.0062	0.30167			0.0759	0.0012	0.44604	0.0538	0.0035	no value	NAN	1066	21	1063	34	1056	67	1046	32	396	nan	30	nan	44	nan	62	nan	36	nan	180	nan	2	nan	5.56793	0.192211	-28	nan	270212854801055	nan
Z_91500_55	11981_TRA_Data	06/03/2015 (6) 08:02:11.02	06/03/2015 (6)	08:02:11.020000	25.661	11981_TRA_Data, 08:02:11 (25.6 sec)	1.927	0.063	0.185	0.0064	0.014691			0.076	0.0013	0.10864	0.0539	0.0036	no value	NAN	1080	22	1093	34	1057	68	1025	34	243	nan	18	nan	27	nan	56	nan	32	nan	163	nan	2	nan	5.40541	0.186998	-24	nan	250189176524870	nan
Z_91500_56	11982_TRA_Data	06/03/2015 (6) 08:03:33.02	06/03/2015 (6)	08:03:33.020000	25.661	11982_TRA_Data, 08:03:33 (25.6 sec)	1.89	0.062	0.1812	0.0062	0.043275			0.0759	0.0012	0.033449	0.0536	0.0035	no value	NAN	1067	22	1072	34	1052	67	1027	33	226	nan	17	nan	25	nan	57	nan	33	nan	164	nan	2	nan	5.51876	0.188832	-19	nan	249830916747571	nan
Z_91500_57	11998_TRA_Data	06/03/2015 (6) 08:25:55.65	06/03/2015 (6)	08:25:55.650000	26.03	11998_TRA_Data, 08:25:56 (26 sec)	1.914	0.062	0.1869	0.0064	0.31217			0.0743	0.0012	0.43151	0.0545	0.0036	no value	NAN	1080	22	1103	35	1069	68	998	33	71	nan	5	nan	8	nan	56	nan	32	nan	164	nan	2	nan	5.35046	0.183215	-41	nan	250267131685547	nan
Z_91500_58	11999_TRA_Data	06/03/2015 (6) 08:27:18.52	06/03/2015 (6)	08:27:18.520000	25.157	11999_TRA_Data, 08:27:19 (25.1 sec)	1.891	0.061	0.1806	0.0062	0.34785			0.0762	0.0012	0.45842	0.0532	0.0035	no value	NAN	1072	22	1069	34	1045	66	1053	32	69	nan	5	nan	7	nan	57	nan	33	nan	164	nan	2	nan	5.5371	0.190089	-32	nan	249785114098050	nan
s71226120373_1	11793_TRA_Data	06/03/2015 (6) 03:39:23.72	06/03/2015 (6)	03:39:23.720000	16.535	11793_TRA_Data, 03:39:24 (25.9 sec)	3.59	0.1	0.2691	0.0088	0.56746			0.09632	0.00083	0.49195	0.0784	0.005	no value	NAN	1542	24	1534	45	1524	93	1546	17	30230	nan	2966	nan	5314	nan	209	nan	188	nan	1327	nan	1	nan	3.71609	0.121522	-2	nan	1442204246030930	nan	s71226120373_1
s71226120373_2	11794_TRA_Data	06/03/2015 (6) 03:40:50.82	06/03/2015 (6)	03:40:50.820000	6.8103	11794_TRA_Data, 03:40:47 (25 sec)	19.29	0.59	0.597	0.021	0.63626			0.2345	0.0019	0.54798	0.173	0.011	no value	NAN	3052	31	3011	83	3220	170	3074	13	304199	nan	71868	nan	47492	nan	304	nan	241	nan	3762	nan	1	nan	1.67504	0.0589211	2	nan	5171824628339750	nan	s71226120373_2
s71226120373_3	11795_TRA_Data	06/03/2015 (6) 03:42:10.22	06/03/2015 (6)	03:42:10.220000	24.46	11795_TRA_Data, 03:42:10 (24.6 sec)	3.87	0.12	0.2759	0.0094	0.48155			0.1017	0.001	0.51501	0.0823	0.0051	no value	NAN	1604	25	1568	47	1600	96	1636	19	-26892	nan	-2826	nan	-8800	nan	106	nan	182	nan	1375	nan	1	nan	3.6245	0.123488	2	nan	853748976376686	nan	s71226120373_3
s71226120373_4	11796_TRA_Data	06/03/2015 (6) 03:43:31.88	06/03/2015 (6)	03:43:31.880000	26.803	11796_TRA_Data, 03:43:32 (26.8 sec)	7.79	0.23	0.411	0.014	0.59254			0.1371	0.001	0.46545	0.1193	0.0074	no value	NAN	2205	27	2216	63	2280	130	2185	13	-20955	nan	-2922	nan	-8427	nan	125	nan	293	nan	3122	nan	0	nan	2.43309	0.082879	-2	nan	1601951202220950	nan	s71226120373_4
s71226120373_5	11797_TRA_Data	06/03/2015 (6) 03:45:08.57	06/03/2015 (6)	03:45:08.570000	11.951	11797_TRA_Data, 03:44:56 (25.9 sec)	11.91	0.35	0.468	0.016	0.56857			0.1835	0.0016	0.47179	0.1466	0.0083	no value	NAN	2594	28	2470	69	2760	150	2672	15	-8041	nan	-1494	nan	-929	nan	57	nan	36	nan	506	nan	2	nan	2.13675	0.0730514	7	nan	760226671275282	nan	s71226120373_5
s71226120373_6	11798_TRA_Data	06/03/2015 (6) 03:46:17.94	06/03/2015 (6)	03:46:17.940000	16.886	11798_TRA_Data, 03:46:18 (25.9 sec)	1.964	0.062	0.189	0.0065	0.52594			0.07569	0.00085	0.44108	0.0584	0.004	no value	NAN	1099	21	1114	36	1145	77	1065	23	-6171	nan	-530	nan	-927	nan	223	nan	158	nan	784	nan	1	nan	5.29101	0.181966	-19	nan	1028773954356370	nan	s71226120373_6
s71226120373_7	11799_TRA_Data	06/03/2015 (6) 03:47:41.86	06/03/2015 (6)	03:47:41.860000	12.506	11799_TRA_Data, 03:47:42 (24.8 sec)	0.537	0.02	0.0712	0.0026	0.24126			0.0555	0.0013	0.43563	0.0205	0.0019	no value	NAN	433	13	443	15	411	38	369	50	-1944	nan	-109	nan	-246	nan	157	nan	98	nan	181	nan	2	nan	14.0449	0.512877	68	nan	268517461963340	nan	s71226120373_7
s71226120373_8	11800_TRA_Data	06/03/2015 (6) 03:49:04.83	06/03/2015 (6)	03:49:04.830000	6.5324	11800_TRA_Data, 03:49:04 (24.6 sec)	9.55	0.26	0.39	0.012	0.6461			0.1782	0.0017	0.44369	0.1134	0.0049	no value	NAN	2387	31	2120	58	2167	93	2626	16	-15322	nan	-2751	nan	-1338	nan	246	nan	106	nan	1081	nan	2	nan	2.5641	0.0788955	19	nan	2709409020645330	nan	s71226120373_8
s71226120373_9	11807_TRA_Data	06/03/2015 (6) 03:59:04.62	06/03/2015 (6)	03:59:04.620000	19.137	11807_TRA_Data, 03:59:05 (26 sec)	1.766	0.052	0.1714	0.0056	0.73866			0.07441	0.00053	0.37433	0.0523	0.0034	no value	NAN	1030	21	1019	31	1029	65	1047	15	-18273	nan	-1390	nan	-2016	nan	1124	nan	702	nan	3031	nan	2	nan	5.83431	0.190619	0	nan	4636317375952980	nan	s71226120373_9
s71226120373_10	11808_TRA_Data	06/03/2015 (6) 04:00:35.55	06/03/2015 (6)	04:00:35.550000	15.054	11808_TRA_Data, 04:00:28 (25.8 sec)	13.95	0.4	0.529	0.018	0.77531			0.1904	0.0015	0.33671	0.317	0.024	no value	NAN	2740	29	2729	75	5000	250	2737	13	-4877	nan	-938	nan	-47	nan	107	nan	4	nan	86	nan	36	nan	1.89036	0.0643222	0	nan	1335157588267590	nan	s71226120373_10
s71226120373_11	11809_TRA_Data	06/03/2015 (6) 04:01:48.99	06/03/2015 (6)	04:01:48.990000	8.0291	11809_TRA_Data, 04:01:49 (26.5 sec)	1.668	0.055	0.1546	0.0051	0.5795			0.07921	0.00086	0.47645	0.0316	0.0034	no value	NAN	993	20	926	29	628	65	1160	19	-10982	nan	-883	nan	-253	nan	1055	nan	166	nan	451	nan	7	nan	6.4683	0.213379	14	nan	3593494468915400	nan	s71226120373_11
s71226120373_12	11810_TRA_Data	06/03/2015 (6) 04:03:12.34	06/03/2015 (6)	04:03:12.340000	8.1544	11810_TRA_Data, 04:03:12 (26.4 sec)	0.937	0.043	0.1096	0.0042	0.49067			0.064	0.0021	0.44506	0.0286	0.0061	no value	NAN	668	18	669	24	570	55	692	53	-724	nan	-47	nan	-126	nan	112	nan	101	nan	255	nan	1	nan	9.12409	0.349646	90	nan	312647094231074	nan	s71226120373_12
s71226120373_13	11811_TRA_Data	06/03/2015 (6) 04:04:34.48	06/03/2015 (6)	04:04:34.480000	15.038	11811_TRA_Data, 04:04:34 (26.1 sec)	3.229	0.092	0.252	0.0082	0.65929			0.09286	0.00069	0.46335	0.074	0.0045	no value	NAN	1460	23	1448	42	1442	85	1472	14	-6948	nan	-656	nan	-577	nan	481	nan	204	nan	1363	nan	2	nan	3.96825	0.129126	0	nan	2858259351789750	nan	s71226120373_13
s71226120373_14	11812_TRA_Data	06/03/2015 (6) 04:05:57.12	06/03/2015 (6)	04:05:57.120000	11.321	11812_TRA_Data, 04:05:57 (25.5 sec)	3.89	0.11	0.2818	0.0087	0.53234			0.1007	0.0011	0.37861	0.0747	0.0041	no value	NAN	1604	29	1599	46	1454	78	1614	22	-1308	nan	-130	nan	-223	nan	85	nan	76	nan	509	nan	1	nan	3.54862	0.109556	-3	nan	609435809131179	nan	s71226120373_14
s71226120373_15	11813_TRA_Data	06/03/2015 (6) 04:07:19.52	06/03/2015 (6)	04:07:19.520000	8.2244	11813_TRA_Data, 04:07:20 (25.1 sec)	4.22	0.12	0.2862	0.009	0.70985			0.1071	0.001	0.44776	0.0795	0.0042	no value	NAN	1672	31	1619	49	1544	80	1738	17	-10427	nan	-1120	nan	-2464	nan	686	nan	824	nan	5820	nan	1	nan	3.49406	0.109876	6	nan	5181058396500220	nan	s71226120373_15
s71226120373_16	11814_TRA_Data	06/03/2015 (6) 04:08:54.89	06/03/2015 (6)	04:08:54.890000	11.251	11814_TRA_Data, 04:08:43 (24.7 sec)	3.91	0.12	0.2723	0.0089	0.54766			0.1037	0.0013	0.42759	0.087	0.0051	no value	NAN	1607	26	1549	46	1683	95	1672	22	-928	nan	-101	nan	-190	nan	46	nan	48	nan	405	nan	1	nan	3.67242	0.120031	4	nan	325452186090248	nan	s71226120373_16
s71226120373_17	11815_TRA_Data	06/03/2015 (6) 04:10:21.63	06/03/2015 (6)	04:10:21.630000	10.472	11815_TRA_Data, 04:10:06 (26.6 sec)	0.497	0.016	0.0644	0.0021	0.31033			0.05593	0.00083	0.22386	0.0226	0.0013	no value	NAN	407	11	403	13	451	26	396	31	-784	nan	-44	nan	-212	nan	142	nan	188	nan	421	nan	1	nan	15.528	0.506346	71	nan	251403688393801	nan	s71226120373_17
s71226120373_18	11816_TRA_Data	06/03/2015 (6) 04:11:37.61	06/03/2015 (6)	04:11:37.610000	11.679	11816_TRA_Data, 04:11:30 (24.9 sec)	3.97	0.12	0.2642	0.0089	0.80258			0.10843	0.0007	0.39352	0.0808	0.0049	no value	NAN	1624	24	1509	45	1570	92	1765	12	-14461	nan	-1595	nan	-1405	nan	561	nan	279	nan	2164	nan	2	nan	3.78501	0.127504	14	nan	3524306349769030	nan	s71226120373_18
s71226120373_19	11817_TRA_Data	06/03/2015 (6) 04:12:58.01	06/03/2015 (6)	04:12:58.010000	14.821	11817_TRA_Data, 04:12:52 (24.2 sec)	4.16	0.13	0.2582	0.0085	0.66481			0.1142	0.0014	-0.17216	0.1156	0.0068	no value	NAN	1644	27	1479	44	2200	120	1833	24	-5533	nan	-610	nan	-2106	nan	269	nan	434	nan	3873	nan	1	nan	3.87297	0.127499	17	nan	1947545139090810	nan	s71226120373_19
s71226120373_20	11818_TRA_Data	06/03/2015 (6) 04:14:15.34	06/03/2015 (6)	04:14:15.340000	20.679	11818_TRA_Data, 04:14:15 (24.7 sec)	0.923	0.031	0.1055	0.0038	0.60415			0.06315	0.00079	0.24973	0.0358	0.0023	no value	NAN	658	16	646	22	711	45	683	27	-2139	nan	-136	nan	-297	nan	205	nan	135	nan	460	nan	2	nan	9.47867	0.341412	-10	nan	512551929825147	nan	s71226120373_20
s71226120373_21	11820_TRA_Data	06/03/2015 (6) 04:17:00.41	06/03/2015 (6)	04:17:00.410000	26.266	11820_TRA_Data, 04:17:00 (26.2 sec)	10.56	0.32	0.466	0.016	0.63565			0.164	0.0013	0.48151	0.1323	0.0083	no value	NAN	2480	27	2461	69	2510	150	2488	13	-5085	nan	-854	nan	-729	nan	85	nan	66	nan	802	nan	1	nan	2.14592	0.0736798	0	nan	1042286113592220	nan	s71226120373_21
s71226120373_22	11827_TRA_Data	06/03/2015 (6) 04:27:02.52	06/03/2015 (6)	04:27:02.520000	7.6472	11827_TRA_Data, 04:27:03 (25.1 sec)	3.181	0.089	0.2491	0.0078	0.62879			0.0927	0.00076	0.5178	0.0649	0.0037	no value	NAN	1449	25	1431	41	1271	70	1469	16	-54269	nan	-5240	nan	-4809	nan	490	nan	252	nan	1446	nan	2	nan	4.01445	0.125703	-1	nan	2929570861280730	nan	s71226120373_22
s71226120373_23	11828_TRA_Data	06/03/2015 (6) 04:28:24.56	06/03/2015 (6)	04:28:24.560000	25.123	11828_TRA_Data, 04:28:25 (25.1 sec)	3.162	0.097	0.2505	0.0086	0.6297			0.09167	0.00092	0.47375	0.0838	0.0053	no value	NAN	1444	24	1438	44	1624	97	1441	20	-20475	nan	-1849	nan	-2599	nan	262	nan	157	nan	1163	nan	2	nan	3.99202	0.137051	-6	nan	1616863204374160	nan	s71226120373_23
s71226120373_24	11829_TRA_Data	06/03/2015 (6) 04:29:55.47	06/03/2015 (6)	04:29:55.470000	9.1009	11829_TRA_Data, 04:29:48 (24.6 sec)	0.548	0.037	0.0697	0.0033	0.16634			0.0579	0.0035	0.3388	0.017	0.01	no value	NAN	440	21	434	20	330	150	460	110	-4979	nan	-267	nan	-90	nan	185	nan	19	nan	33	nan	10	nan	14.3472	0.679279	53	nan	273952243962536	nan	s71226120373_24
s71226120373_25	11830_TRA_Data	06/03/2015 (6) 04:31:10.65	06/03/2015 (6)	04:31:10.650000	11.407	11830_TRA_Data, 04:31:11 (26 sec)	17.49	0.51	0.576	0.019	0.71859			0.2227	0.0014	0.46763	0.1437	0.0093	no value	NAN	2957	28	2928	77	2710	160	2991	10	-55717	nan	-12544	nan	-12816	nan	365	nan	475	nan	6061	nan	1	nan	1.73611	0.0572676	1	nan	6389883417110630	nan	s71226120373_25
s71226120373_26	11831_TRA_Data	06/03/2015 (6) 04:32:39.31	06/03/2015 (6)	04:32:39.310000	20.374	11831_TRA_Data, 04:32:34 (25.7 sec)	0.774	0.026	0.094	0.0033	0.23959			0.05974	0.00091	0.44892	0.0308	0.0019	no value	NAN	579	14	579	19	614	38	546	33	-3138	nan	-192	nan	-1504	nan	149	nan	421	nan	1185	nan	0	nan	10.6383	0.373472	12	nan	483008710667148	nan	s71226120373_26
s71226120373_27	11832_TRA_Data	06/03/2015 (6) 04:33:56.49	06/03/2015 (6)	04:33:56.490000	24.228	11832_TRA_Data, 04:33:56 (25.1 sec)	3.68	0.11	0.2686	0.0092	0.61474			0.09936	0.00089	0.47374	0.0809	0.0051	no value	NAN	1563	24	1532	47	1571	95	1597	17	-12992	nan	-1291	nan	-3476	nan	158	nan	216	nan	1597	nan	1	nan	3.72301	0.127519	2	nan	1178572573640840	nan	s71226120373_27
s71226120373_28	11833_TRA_Data	06/03/2015 (6) 04:35:20.39	06/03/2015 (6)	04:35:20.390000	24.561	11833_TRA_Data, 04:35:20 (26.8 sec)	0.559	0.019	0.0666	0.0023	0.28134			0.061	0.0011	0.40403	0.022	0.0014	no value	NAN	448	12	415	14	439	28	573	38	-3635	nan	-220	nan	-743	nan	176	nan	172	nan	333	nan	1	nan	15.015	0.518537	62	nan	302588359356337	nan	s71226120373_28
s71226120373_29	11834_TRA_Data	06/03/2015 (6) 04:36:54.85	06/03/2015 (6)	04:36:54.850000	13.826	11834_TRA_Data, 04:36:42 (26.3 sec)	4.4	0.13	0.2995	0.0098	0.62112			0.10534	0.00079	0.47353	0.0978	0.0055	no value	NAN	1709	24	1687	49	1880	100	1716	14	-24248	nan	-2645	nan	-7189	nan	174	nan	262	nan	2523	nan	1	nan	3.3389	0.109253	0	nan	1481041555188800	nan	s71226120373_29
s71226120373_30	11835_TRA_Data	06/03/2015 (6) 04:38:05.05	06/03/2015 (6)	04:38:05.050000	25.627	11835_TRA_Data, 04:38:05 (25.6 sec)	5.15	0.16	0.328	0.011	0.52706			0.1138	0.0011	0.54212	0.1036	0.0066	no value	NAN	1840	26	1828	55	1990	120	1846	18	-17897	nan	-2102	nan	-4028	nan	126	nan	166	nan	1403	nan	1	nan	3.04878	0.102246	-1	nan	1083012577137740	nan	s71226120373_30
s71226120373_31	11836_TRA_Data	06/03/2015 (6) 04:39:27.09	06/03/2015 (6)	04:39:27.090000	18.474	11836_TRA_Data, 04:39:27 (25.5 sec)	3.75	0.11	0.2724	0.0091	0.66864			0.09978	0.0007	0.44436	0.0808	0.0054	no value	NAN	1580	24	1551	46	1569	99	1611	13	-93388	nan	-9554	nan	-24620	nan	431	nan	581	nan	4190	nan	1	nan	3.67107	0.122639	2	nan	3271174847299520	nan	s71226120373_31
s71226120373_32	11837_TRA_Data	06/03/2015 (6) 04:40:50.56	06/03/2015 (6)	04:40:50.560000	25.123	11837_TRA_Data, 04:40:51 (25.1 sec)	2.378	0.073	0.2082	0.0071	0.6168			0.08277	0.00077	0.42518	0.0656	0.0042	no value	NAN	1234	22	1218	38	1285	80	1250	18	-69337	nan	-6484	nan	-2679	nan	221	nan	59	nan	360	nan	4	nan	4.80307	0.163794	-1	nan	1038025068084670	nan	s71226120373_32
s71226120373_33	11838_TRA_Data	06/03/2015 (6) 04:42:12.68	06/03/2015 (6)	04:42:12.680000	25.997	11838_TRA_Data, 04:42:13 (25.9 sec)	14.39	0.43	0.536	0.018	0.60177			0.1944	0.0015	0.51131	0.1457	0.009	no value	NAN	2773	29	2759	75	2750	160	2772	13	40163	nan	7621	nan	8161	nan	93	nan	108	nan	1453	nan	1	nan	1.86567	0.0626532	0	nan	1434177894012160	nan	s71226120373_33
s71226120373_34	11839_TRA_Data	06/03/2015 (6) 04:43:36.71	06/03/2015 (6)	04:43:36.710000	7.6564	11839_TRA_Data, 04:43:36 (25.3 sec)	11.32	0.37	0.45	0.016	0.70231			0.1845	0.0018	0.5208	0.1	0.0087	no value	NAN	2546	28	2388	70	1930	110	2689	16	41683	nan	7894	nan	1598	nan	286	nan	67	nan	598	nan	4	nan	2.22222	0.0790123	11	nan	3549252961697790	nan	s71226120373_34
s71226120373_35	11840_TRA_Data	06/03/2015 (6) 04:44:58.39	06/03/2015 (6)	04:44:58.390000	12.4	11840_TRA_Data, 04:44:58 (25.2 sec)	2.75	0.21	0.231	0.017	0.70924			0.0874	0.0012	0.46452	0.0665	0.0056	no value	NAN	1337	26	1335	58	1301	97	1353	27	20513	nan	1847	nan	3159	nan	389	nan	289	nan	1715	nan	1	nan	4.329	0.318585	-5	nan	2204093693733540	nan	s71226120373_35
s71226120373_36	11848_TRA_Data	06/03/2015 (6) 04:56:34.68	06/03/2015 (6)	04:56:34.680000	8.8841	11848_TRA_Data, 04:56:21 (24.8 sec)	10.99	0.33	0.441	0.015	0.8643			0.1792	0.0011	0.41911	0.1439	0.0083	no value	NAN	2515	28	2348	67	2710	150	2642	11	29983	nan	5477	nan	789	nan	402	nan	56	nan	795	nan	7	nan	2.26757	0.0771284	11	nan	4615121522492010	nan	s71226120373_36
s71226120373_37	11849_TRA_Data	06/03/2015 (6) 04:57:43.68	06/03/2015 (6)	04:57:43.680000	15.414	11849_TRA_Data, 04:57:44 (25.9 sec)	4.92	0.15	0.316	0.011	0.75326			0.11371	0.00081	0.42188	0.0844	0.0058	no value	NAN	1802	25	1766	52	1640	110	1847	13	11096	nan	1288	nan	2863	nan	246	nan	345	nan	2568	nan	1	nan	3.16456	0.110159	3	nan	2108898102479650	nan	s71226120373_37
s71226120373_38	11850_TRA_Data	06/03/2015 (6) 04:59:22.72	06/03/2015 (6)	04:59:22.720000	9.9593	11850_TRA_Data, 04:59:07 (25.9 sec)	3.71	0.11	0.274	0.0092	0.41978			0.0978	0.0012	0.34286	0.0988	0.0054	no value	NAN	1565	25	1558	46	1900	100	1557	23	2554	nan	256	nan	943	nan	47	nan	80	nan	776	nan	1	nan	3.64963	0.122542	-7	nan	373830770009471	nan	s71226120373_38
s71226120373_39	11851_TRA_Data	06/03/2015 (6) 05:00:29.92	06/03/2015 (6)	05:00:29.920000	25.762	11851_TRA_Data, 05:00:30 (25.7 sec)	5.44	0.16	0.337	0.011	0.57953			0.11673	0.00093	0.4891	0.098	0.0061	no value	NAN	1888	26	1870	55	1890	110	1896	14	9592	nan	1137	nan	1702	nan	155	nan	144	nan	1303	nan	1	nan	2.96736	0.0968574	0	nan	1291822703779760	nan	s71226120373_39
s71226120373_40	11852_TRA_Data	06/03/2015 (6) 05:02:04.65	06/03/2015 (6)	05:02:04.650000	13.029	11852_TRA_Data, 05:01:52 (25.7 sec)	10.28	0.3	0.456	0.015	0.65283			0.1615	0.0013	0.44359	0.1329	0.0098	no value	NAN	2453	28	2419	68	2480	170	2463	14	6526	nan	1120	nan	128	nan	90	nan	7	nan	88	nan	17	nan	2.19298	0.0721376	1	nan	953097660488799	nan	s71226120373_40
s71226120373_41	11853_TRA_Data	06/03/2015 (6) 05:03:16.13	06/03/2015 (6)	05:03:16.130000	24.552	11853_TRA_Data, 05:03:16 (24.5 sec)	5.41	0.17	0.34	0.012	0.60237			0.1154	0.0014	0.36826	0.1012	0.0063	no value	NAN	1875	27	1880	57	1950	120	1864	23	4594	nan	515	nan	1122	nan	67	nan	80	nan	742	nan	1	nan	2.94118	0.103806	-4	nan	566044518230968	nan	s71226120373_41
s71226120373_42	11854_TRA_Data	06/03/2015 (6) 05:04:38.21	06/03/2015 (6)	05:04:38.210000	15.115	11854_TRA_Data, 05:04:38 (26.4 sec)	14.71	0.47	0.536	0.018	0.69489			0.2006	0.0019	0.54059	0.1417	0.0089	no value	NAN	2794	49	2761	86	2670	160	2820	17	11661	nan	2419	nan	1459	nan	138	nan	127	nan	1619	nan	1	nan	1.86567	0.0626532	1	nan	2096858309939000	nan	s71226120373_42
s71226120373_43	11855_TRA_Data	06/03/2015 (6) 05:06:08.35	06/03/2015 (6)	05:06:08.350000	10.86	11855_TRA_Data, 05:06:02 (25.2 sec)	2.548	0.074	0.1903	0.0061	0.54444			0.09646	0.00092	0.47452	0.0654	0.0039	no value	NAN	1282	23	1123	34	1279	74	1542	19	9199	nan	902	nan	3237	nan	213	nan	344	nan	2110	nan	1	nan	5.25486	0.168443	26	nan	1189576163876230	nan	s71226120373_43
s71226120373_44	11856_TRA_Data	06/03/2015 (6) 05:07:24.90	06/03/2015 (6)	05:07:24.900000	11.392	11856_TRA_Data, 05:07:25 (26.4 sec)	0.726	0.09	0.0846	0.003	0.57869			0.0629	0.0053	0.35409	0.0234	0.0029	no value	NAN	551	32	523	18	467	56	666	77	5278	nan	333	nan	4109	nan	352	nan	1399	nan	2898	nan	0	nan	11.8203	0.419161	-89	nan	1197365419722150	nan	s71226120373_44
s71226120373_45	11857_TRA_Data	06/03/2015 (6) 05:08:48.12	06/03/2015 (6)	05:08:48.120000	5.8667	11857_TRA_Data, 05:08:49 (25.4 sec)	0.513	0.015	0.0658	0.002	0.61882			0.05719	0.00076	0.30073	0.0163	0.00094	no value	NAN	420	10	410	12	327	19	473	28	6793	nan	390	nan	747	nan	657	nan	387	nan	543	nan	2	nan	15.1976	0.461932	38	nan	1030412024711200	nan	s71226120373_45
s71226120373_46	11858_TRA_Data	06/03/2015 (6) 05:10:11.31	06/03/2015 (6)	05:10:11.310000	26.366	11858_TRA_Data, 05:10:11 (26.3 sec)	2.189	0.067	0.1985	0.0067	0.49578			0.07998	0.00084	0.37523	0.0593	0.0037	no value	NAN	1174	21	1165	36	1163	70	1175	21	4198	nan	342	nan	1396	nan	133	nan	226	nan	1277	nan	1	nan	5.03778	0.170041	-8	nan	779484760477334	nan	s71226120373_46
s71226120373_47	11859_TRA_Data	06/03/2015 (6) 05:11:35.02	06/03/2015 (6)	05:11:35.020000	25.661	11859_TRA_Data, 05:11:35 (25.6 sec)	9.33	0.28	0.428	0.015	0.62932			0.1586	0.0012	0.48648	0.1244	0.0078	no value	NAN	2367	28	2292	65	2370	140	2429	13	6975	nan	1126	nan	1467	nan	139	nan	191	nan	2134	nan	1	nan	2.33645	0.0818849	5	nan	1745925593700040	nan	s71226120373_47
s71226120373_48	11860_TRA_Data	06/03/2015 (6) 05:12:58.15	06/03/2015 (6)	05:12:58.150000	26.534	11860_TRA_Data, 05:12:58 (26.5 sec)	2.308	0.072	0.2076	0.0071	0.3982			0.0808	0.001	0.46676	0.0636	0.0041	no value	NAN	1208	22	1215	38	1245	77	1185	25	1408	nan	113	nan	138	nan	76	nan	39	nan	225	nan	2	nan	4.81696	0.164742	-19	nan	375666435174088	nan	s71226120373_48
s71226120373_49	11867_TRA_Data	06/03/2015 (6) 05:22:57.15	06/03/2015 (6)	05:22:57.150000	25.526	11867_TRA_Data, 05:22:57 (25.5 sec)	5.89	0.18	0.351	0.012	0.62892			0.1215	0.001	0.42561	0.1025	0.0064	no value	NAN	1955	26	1937	57	1970	120	1968	15	2117	nan	259	nan	478	nan	134	nan	165	nan	1545	nan	1	nan	2.849	0.0974018	0	nan	1219601320990950	nan	s71226120373_49
s71226120373_50	11868_TRA_Data	06/03/2015 (6) 05:24:24.39	06/03/2015 (6)	05:24:24.390000	13.166	11868_TRA_Data, 05:24:20 (24.5 sec)	2.599	0.076	0.2143	0.0071	0.51091			0.0878	0.00081	0.5556	0.0797	0.0046	no value	NAN	1298	22	1253	38	1550	87	1362	18	2048	nan	181	nan	208	nan	252	nan	112	nan	832	nan	2	nan	4.66636	0.154602	5	nan	1280935338236920	nan	s71226120373_50
s71226120373_51	11869_TRA_Data	06/03/2015 (6) 05:25:43.52	06/03/2015 (6)	05:25:43.520000	13.273	11869_TRA_Data, 05:25:44 (26.1 sec)	2.993	0.087	0.227	0.0072	0.6626			0.09597	0.00084	0.52162	0.0676	0.0036	no value	NAN	1402	27	1317	39	1321	70	1537	17	4803	nan	461	nan	864	nan	628	nan	552	nan	3392	nan	1	nan	4.40529	0.139727	13	nan	3647964185972330	nan	s71226120373_51
s71226120373_52	11870_TRA_Data	06/03/2015 (6) 05:27:11.60	06/03/2015 (6)	05:27:11.600000	11.804	11870_TRA_Data, 05:27:07 (24.8 sec)	3.44	0.1	0.2489	0.0086	0.62965			0.10036	0.00075	0.47662	0.0687	0.0044	no value	NAN	1513	24	1432	44	1342	83	1620	14	3670	nan	373	nan	1208	nan	327	nan	605	nan	3907	nan	1	nan	4.01768	0.138819	10	nan	2466593254105480	nan	s71226120373_52
s71226120373_53	11871_TRA_Data	06/03/2015 (6) 05:28:42.73	06/03/2015 (6)	05:28:42.730000	11.954	11871_TRA_Data, 05:28:30 (24.6 sec)	3.71	0.11	0.2653	0.009	0.85975			0.1004	0.00077	0.27589	0.0904	0.005	no value	NAN	1565	25	1512	47	1746	93	1627	14	2031	nan	231	nan	119	nan	299	nan	70	nan	618	nan	4	nan	3.76932	0.12787	6	nan	1743792486582060	nan	s71226120373_53
s71226120373_54	11872_TRA_Data	06/03/2015 (6) 05:29:52.91	06/03/2015 (6)	05:29:52.910000	5.0269	11872_TRA_Data, 05:29:53 (26.7 sec)	0.548	0.021	0.0704	0.0023	0.45148			0.0571	0.0012	0.40169	0.0196	0.0014	no value	NAN	444	13	438	14	392	28	447	40	550	nan	33	nan	168	nan	234	nan	328	nan	545	nan	1	nan	14.2045	0.464069	-30	nan	460735591498820	nan	s71226120373_54
s71226120373_55	11873_TRA_Data	06/03/2015 (6) 05:31:22.22	06/03/2015 (6)	05:31:22.220000	13.884	11873_TRA_Data, 05:31:15 (26.1 sec)	3.73	0.11	0.2715	0.0094	0.65619			0.09886	0.00074	0.48402	0.0817	0.0049	no value	NAN	1574	25	1547	47	1586	92	1593	14	4661	nan	466	nan	1280	nan	491	nan	736	nan	5494	nan	1	nan	3.68324	0.127523	2	nan	3795874277990910	nan	s71226120373_55
s71226120373_56	11874_TRA_Data	06/03/2015 (6) 05:32:38.31	06/03/2015 (6)	05:32:38.310000	12.705	11874_TRA_Data, 05:32:38 (26.3 sec)	13.66	0.42	0.517	0.018	0.66186			0.1926	0.0019	0.56222	0.138	0.013	no value	NAN	2720	40	2678	80	2610	130	2751	17	2012	nan	395	nan	1188	nan	126	nan	393	nan	4706	nan	0	nan	1.93424	0.0673428	2	nan	2477853027558110	nan	s71226120373_56
s71226120373_57	11875_TRA_Data	06/03/2015 (6) 05:34:01.44	06/03/2015 (6)	05:34:01.440000	15.851	11875_TRA_Data, 05:34:01 (26.4 sec)	2.932	0.087	0.232	0.0077	0.64016			0.09194	0.00069	0.44504	0.0666	0.0043	no value	NAN	1387	23	1343	40	1304	81	1453	14	3081	nan	298	nan	470	nan	424	nan	380	nan	2208	nan	1	nan	4.31034	0.143059	6	nan	2562867866912100	nan	s71226120373_57
s71226120373_58	11876_TRA_Data	06/03/2015 (6) 05:35:24.66	06/03/2015 (6)	05:35:24.660000	11.746	11876_TRA_Data, 05:35:25 (25 sec)	3.094	0.089	0.2452	0.0079	0.71899			0.09168	0.00068	0.40166	0.0681	0.0037	no value	NAN	1428	25	1411	42	1331	71	1451	14	5352	nan	498	nan	531	nan	591	nan	314	nan	1900	nan	2	nan	4.0783	0.131397	0	nan	3459555781512160	nan	s71226120373_58
s71226120373_59	11877_TRA_Data	06/03/2015 (6) 05:36:47.72	06/03/2015 (6)	05:36:47.720000	11.202	11877_TRA_Data, 05:36:48 (20.8 sec)	0.489	0.016	0.0596	0.0021	0.50826			0.05995	0.00084	0.43803	0.0183	0.0012	no value	NAN	404	11	373	13	366	24	584	29	1447	nan	91	nan	327	nan	730	nan	771	nan	1258	nan	1	nan	16.7785	0.59119	30	nan	1131151372722300	nan	s71226120373_59
s71226120373_60	11878_TRA_Data	06/03/2015 (6) 05:38:10.68	06/03/2015 (6)	05:38:10.680000	12.143	11878_TRA_Data, 05:38:11 (25.9 sec)	2.227	0.068	0.183	0.006	0.52946			0.08833	0.0009	0.53285	0.0627	0.0034	no value	NAN	1185	27	1082	34	1226	66	1374	21	3348	nan	299	nan	248	nan	542	nan	168	nan	951	nan	3	nan	5.46448	0.179163	14	nan	2263124497318470	nan	s71226120373_60
s71226120373_61	11879_TRA_Data	06/03/2015 (6) 05:39:34.05	06/03/2015 (6)	05:39:34.050000	25.627	11879_TRA_Data, 05:39:34 (25.6 sec)	4.05	0.12	0.2922	0.0099	0.36787			0.1011	0.001	0.45535	0.0904	0.0057	no value	NAN	1642	25	1648	49	1750	100	1626	19	1022	nan	104	nan	190	nan	95	nan	92	nan	744	nan	1	nan	3.42231	0.115951	-5	nan	708245526570047	nan	s71226120373_61
s71226120373_62	11880_TRA_Data	06/03/2015 (6) 05:40:57.61	06/03/2015 (6)	05:40:57.610000	10.427	11880_TRA_Data, 05:40:58 (25.6 sec)	1.917	0.09	0.1848	0.0081	0.69938			0.0759	0.0013	0.42803	0.0478	0.0042	no value	NAN	1087	21	1092	38	943	56	1084	29	3808	nan	292	nan	163	nan	606	nan	142	nan	589	nan	4	nan	5.41125	0.237182	-6	nan	2532447904415000	nan	s71226120373_62
s71226120373_63	11887_TRA_Data	06/03/2015 (6) 05:50:55.72	06/03/2015 (6)	05:50:55.720000	9.6081	11887_TRA_Data, 05:50:56 (25.9 sec)	3.8	0.11	0.2722	0.0083	0.67542			0.10199	0.00087	0.4147	0.0691	0.004	no value	NAN	1590	28	1551	44	1353	77	1644	16	1715	nan	181	nan	440	nan	186	nan	292	nan	1763	nan	1	nan	3.67377	0.112022	4	nan	1428846247501530	nan	s71226120373_63
s71226120373_64	11888_TRA_Data	06/03/2015 (6) 05:52:19.25	06/03/2015 (6)	05:52:19.250000	19.653	11888_TRA_Data, 05:52:19 (25.4 sec)	3.147	0.096	0.2464	0.0083	0.53909			0.0925	0.0011	0.44545	0.0731	0.0047	no value	NAN	1437	24	1417	43	1423	88	1453	22	771	nan	73	nan	119	nan	83	nan	66	nan	437	nan	1	nan	4.05844	0.136709	-2	nan	514602106549959	nan	s71226120373_64
s71226120373_65	11889_TRA_Data	06/03/2015 (6) 05:53:41.88	06/03/2015 (6)	05:53:41.880000	16.559	11889_TRA_Data, 05:53:42 (25.7 sec)	0.5	0.047	0.065	0.005	0.46656			0.0564	0.0015	0.39468	0.018	0.013	no value	NAN	410	20	406	27	370	120	434	51	891	nan	52	nan	30	nan	363	nan	93	nan	158	nan	6	nan	15.3846	1.18343	-2	nan	523003541481700	nan	s71226120373_65
s71226120373_66	11890_TRA_Data	06/03/2015 (6) 05:55:04.46	06/03/2015 (6)	05:55:04.460000	25.224	11890_TRA_Data, 05:55:04 (25.2 sec)	0.519	0.017	0.0671	0.0023	0.30572			0.05626	0.00091	0.3523	0.0209	0.0013	no value	NAN	422	11	418	14	418	26	416	35	591	nan	33	nan	104	nan	193	nan	179	nan	335	nan	1	nan	14.9031	0.510838	64	nan	331435183202511	nan	s71226120373_66
s71226120373_67	11891_TRA_Data	06/03/2015 (6) 05:56:26.66	06/03/2015 (6)	05:56:26.660000	25.022	11891_TRA_Data, 05:56:27 (25 sec)	0.51	0.016	0.0655	0.0022	0.44878			0.05667	0.00065	0.43572	0.021	0.0013	no value	NAN	418	11	409	14	420	26	446	25	1789	nan	107	nan	399	nan	490	nan	525	nan	1010	nan	1	nan	15.2672	0.512791	39	nan	835581263491166	nan	s71226120373_67
s71226120373_68	11892_TRA_Data	06/03/2015 (6) 05:57:49.36	06/03/2015 (6)	05:57:49.360000	25.325	11892_TRA_Data, 05:57:49 (25.3 sec)	5.91	0.19	0.355	0.013	0.8902			0.12096	0.00098	0.29864	0.1191	0.0076	no value	NAN	1949	27	1948	60	2270	140	1959	15	4924	nan	595	nan	609	nan	507	nan	282	nan	2559	nan	2	nan	2.8169	0.103154	-1	nan	3864080837950660	nan	s71226120373_68
s71226120373_69	11893_TRA_Data	06/03/2015 (6) 05:59:23.71	06/03/2015 (6)	05:59:23.710000	12.241	11893_TRA_Data, 05:59:12 (25.3 sec)	12.21	0.36	0.485	0.016	0.68369			0.1818	0.0013	0.51753	0.1474	0.0086	no value	NAN	2619	28	2545	70	2770	150	2661	12	6487	nan	1195	nan	1069	nan	182	nan	174	nan	2327	nan	1	nan	2.06186	0.06802	4	nan	2559578179883770	nan	s71226120373_69
s71226120373_70	11894_TRA_Data	06/03/2015 (6) 06:00:35.72	06/03/2015 (6)	06:00:35.720000	11.101	11894_TRA_Data, 06:00:36 (24.9 sec)	0.492	0.015	0.0639	0.0021	0.5389			0.05602	0.00082	0.31039	0.0196	0.0012	no value	NAN	404	10	399	13	393	24	426	31	1774	nan	104	nan	260	nan	404	nan	262	nan	458	nan	2	nan	15.6494	0.514301	32	nan	624389192565588	nan	s71226120373_70
s71226120373_71	11895_TRA_Data	06/03/2015 (6) 06:01:58.79	06/03/2015 (6)	06:01:58.790000	24.888	11895_TRA_Data, 06:01:59 (24.8 sec)	1.829	0.056	0.1764	0.006	0.53167			0.07486	0.00071	0.41843	0.0549	0.0034	no value	NAN	1054	20	1046	33	1079	66	1051	20	3160	nan	240	nan	454	nan	216	nan	153	nan	764	nan	1	nan	5.66893	0.192821	-7	nan	935742515951298	nan	s71226120373_71
s71226120373_72	11896_TRA_Data	06/03/2015 (6) 06:03:30.19	06/03/2015 (6)	06:03:30.190000	15.493	11896_TRA_Data, 06:03:21 (24.9 sec)	4.39	0.13	0.2947	0.0098	0.59351			0.10708	0.00083	0.38711	0.0939	0.0055	no value	NAN	1708	25	1663	49	1810	100	1741	14	5490	nan	600	nan	834	nan	172	nan	143	nan	1272	nan	1	nan	3.39328	0.112841	3	nan	1293466900196990	nan	s71226120373_72
s71226120373_73	11897_TRA_Data	06/03/2015 (6) 06:04:43.58	06/03/2015 (6)	06:04:43.580000	24.366	11897_TRA_Data, 06:04:44 (26 sec)	2.893	0.088	0.2336	0.0079	0.60785			0.08919	0.00082	0.38443	0.0723	0.0046	no value	NAN	1376	23	1353	42	1410	88	1398	17	4339	nan	405	nan	797	nan	178	nan	203	nan	1449	nan	1	nan	4.28082	0.144771	1	nan	1107977802954780	nan	s71226120373_73
s71226120373_74	11898_TRA_Data	06/03/2015 (6) 06:06:08.28	06/03/2015 (6)	06:06:08.280000	22.246	11898_TRA_Data, 06:06:06 (25.3 sec)	1.879	0.058	0.1661	0.0057	0.42702			0.08201	0.00095	0.44641	0.0528	0.0033	no value	NAN	1069	21	989	31	1039	63	1223	23	2803	nan	235	nan	1146	nan	141	nan	284	nan	1409	nan	0	nan	6.02047	0.206602	11	nan	722969469586935	nan	s71226120373_74
s71226120373_75	11899_TRA_Data	06/03/2015 (6) 06:07:29.52	06/03/2015 (6)	06:07:29.520000	25.157	11899_TRA_Data, 06:07:30 (25.1 sec)	1.648	0.051	0.1623	0.0055	0.44896			0.07332	0.00084	0.46371	0.0495	0.0032	no value	NAN	984	19	969	31	976	61	1001	24	2639	nan	193	nan	186	nan	146	nan	58	nan	257	nan	2	nan	6.16143	0.208798	-15	nan	551544323083473	nan	s71226120373_75
s71226120373_76	11900_TRA_Data	06/03/2015 (6) 06:09:06.03	06/03/2015 (6)	06:09:06.030000	9.5285	11900_TRA_Data, 06:08:53 (24.9 sec)	4.26	0.16	0.299	0.012	0.8654			0.1028	0.0013	0.19289	0.1065	0.0079	no value	NAN	1653	31	1659	58	2030	110	1654	23	2140	nan	252	nan	1177	nan	84	nan	196	nan	1596	nan	0	nan	3.34448	0.134227	-7	nan	622735294951366	nan	s71226120373_76
s71226120373_77	11907_TRA_Data	06/03/2015 (6) 06:18:52.18	06/03/2015 (6)	06:18:52.180000	26.501	11907_TRA_Data, 06:18:52 (26.5 sec)	2.773	0.088	0.2306	0.008	0.49095			0.0874	0.0011	0.3991	0.075	0.0048	no value	NAN	1343	24	1335	42	1459	90	1343	25	1962	nan	175	nan	265	nan	97	nan	44	nan	287	nan	2	nan	4.33651	0.150443	-14	nan	518243168214967	nan	s71226120373_77
s71226120373_78	11908_TRA_Data	06/03/2015 (6) 06:20:15.68	06/03/2015 (6)	06:20:15.680000	19.262	11908_TRA_Data, 06:20:16 (25.9 sec)	3.78	0.11	0.2744	0.0092	0.52006			0.09963	0.00094	0.46452	0.0819	0.0053	no value	NAN	1584	24	1560	46	1589	98	1601	18	5417	nan	550	nan	1259	nan	129	nan	155	nan	1125	nan	1	nan	3.64432	0.122186	0	nan	952131025419173	nan	s71226120373_78
s71226120373_79	11909_TRA_Data	06/03/2015 (6) 06:21:38.78	06/03/2015 (6)	06:21:38.780000	13.582	11909_TRA_Data, 06:21:39 (25.8 sec)	1.713	0.052	0.1682	0.0056	0.48615			0.0748	0.0011	0.41577	0.0494	0.0031	no value	NAN	1008	20	1000	31	975	61	1018	29	2023	nan	155	nan	1208	nan	107	nan	336	nan	1445	nan	0	nan	5.9453	0.197941	-23	nan	660687143088606	nan	s71226120373_79
s71226120373_80	11910_TRA_Data	06/03/2015 (6) 06:23:18.77	06/03/2015 (6)	06:23:18.770000	6.7602	11910_TRA_Data, 06:23:12 (14.8 sec)	1.634	0.05	0.1527	0.0054	0.78398			0.0772	0.0016	0.25506	0.0554	0.003	no value	NAN	978	20	915	31	1089	59	1110	34	7197	nan	565	nan	934	nan	317	nan	203	nan	1093	nan	2	nan	6.54879	0.231588	15	nan	1171609078506450	nan	s71226120373_80
s71226120373_81	11911_TRA_Data	06/03/2015 (6) 06:24:23.66	06/03/2015 (6)	06:24:23.660000	10.591	11911_TRA_Data, 06:24:24 (25 sec)	3.264	0.093	0.2541	0.008	0.64731			0.09388	0.00085	0.45858	0.0872	0.005	no value	NAN	1465	25	1456	42	1687	94	1485	18	6106	nan	584	nan	1085	nan	220	nan	167	nan	1258	nan	1	nan	3.93546	0.123903	-3	nan	1397602871417360	nan	s71226120373_81
s71226120373_82	11912_TRA_Data	06/03/2015 (6) 06:25:47.26	06/03/2015 (6)	06:25:47.260000	12.68	11912_TRA_Data, 06:25:47 (24.4 sec)	1.905	0.058	0.1798	0.006	0.52574			0.07686	0.00087	0.46284	0.0539	0.0033	no value	NAN	1081	21	1065	33	1059	63	1096	22	3922	nan	308	nan	368	nan	227	nan	113	nan	525	nan	2	nan	5.56173	0.185597	-4	nan	974363882812699	nan	s71226120373_82
s71226120373_83	11913_TRA_Data	06/03/2015 (6) 06:27:09.91	06/03/2015 (6)	06:27:09.910000	14.84	11913_TRA_Data, 06:27:10 (26.7 sec)	3.76	0.12	0.275	0.0093	0.61565			0.0994	0.0013	0.48834	0.0795	0.005	no value	NAN	1579	34	1565	49	1546	90	1597	24	5710	nan	573	nan	587	nan	224	nan	118	nan	824	nan	2	nan	3.63636	0.122975	-1	nan	1460881864127590	nan	s71226120373_83
s71226120373_84	11914_TRA_Data	06/03/2015 (6) 06:28:32.72	06/03/2015 (6)	06:28:32.720000	5.7598	11914_TRA_Data, 06:28:33 (25.9 sec)	1.693	0.044	0.1592	0.0045	0.65992			0.07821	0.00078	0.52459	0.0208	0.0014	no value	NAN	1004	19	951	26	416	28	1136	18	8896	nan	722	nan	144	nan	720	nan	117	nan	206	nan	6	nan	6.28141	0.177552	13	nan	2514469691301930	nan	s71226120373_84
s71226120373_85	11915_TRA_Data	06/03/2015 (6) 06:30:04.29	06/03/2015 (6)	06:30:04.290000	14.501	11915_TRA_Data, 06:29:56 (25.6 sec)	4.38	0.13	0.2885	0.0094	0.82943			0.1089	0.00087	0.35289	0.1018	0.0057	no value	NAN	1699	27	1630	48	1960	110	1773	15	8958	nan	993	nan	802	nan	361	nan	159	nan	1435	nan	2	nan	3.4662	0.112937	7	nan	2419128644451740	nan	s71226120373_85
s71226120373_86	11916_TRA_Data	06/03/2015 (6) 06:31:18.79	06/03/2015 (6)	06:31:18.790000	6.9936	11916_TRA_Data, 06:31:19 (24.8 sec)	0.518	0.016	0.0671	0.0022	0.62412			0.05754	0.00083	0.21455	0.0211	0.0014	no value	NAN	421	11	418	13	421	28	451	33	480	nan	27	nan	234	nan	180	nan	430	nan	724	nan	0	nan	14.9031	0.488627	-6	nan	370880323310775	nan	s71226120373_86
s71226120373_87	11917_TRA_Data	06/03/2015 (6) 06:32:41.88	06/03/2015 (6)	06:32:41.880000	15.451	11917_TRA_Data, 06:32:42 (26.8 sec)	2.008	0.06	0.1336	0.0044	0.69755			0.10917	0.00081	0.52682	0.039	0.0022	no value	NAN	1116	24	808	25	772	43	1772	14	6046	nan	687	nan	307	nan	1303	nan	450	nan	1484	nan	3	nan	7.48503	0.246513	54	nan	3957111241433570	nan	s71226120373_87
s71226120373_88	11918_TRA_Data	06/03/2015 (6) 06:34:04.75	06/03/2015 (6)	06:34:04.750000	25.93	11918_TRA_Data, 06:34:05 (25.9 sec)	1.806	0.056	0.1745	0.006	0.41537			0.07523	0.00093	0.43847	0.0582	0.0037	no value	NAN	1046	20	1036	33	1142	70	1045	25	1130	nan	87	nan	127	nan	147	nan	84	nan	425	nan	2	nan	5.73066	0.197043	-20	nan	624023922650563	nan	s71226120373_88
s71226120373_89	11919_TRA_Data	06/03/2015 (6) 06:35:28.72	06/03/2015 (6)	06:35:28.720000	23.416	11919_TRA_Data, 06:35:29 (24.9 sec)	0.505	0.016	0.0647	0.0022	0.43934			0.05667	0.00081	0.33455	0.0223	0.0015	no value	NAN	414	11	404	13	446	29	437	31	821	nan	47	nan	122	nan	250	nan	188	nan	363	nan	1	nan	15.4559	0.52555	49	nan	400476583067505	nan	s71226120373_89
s71226120373_90	11920_TRA_Data	06/03/2015 (6) 06:36:52.15	06/03/2015 (6)	06:36:52.150000	11.636	11920_TRA_Data, 06:36:52 (24.7 sec)	0.52	0.033	0.0683	0.0028	0.38791			0.0555	0.0029	0.19166	0.017	0.002	no value	NAN	422	17	425	16	340	38	387	71	565	nan	31	nan	57	nan	197	nan	116	nan	166	nan	2	nan	14.6413	0.600229	61	nan	322173866692440	nan	s71226120373_90
s71226120373_91	11927_TRA_Data	06/03/2015 (6) 06:46:55.07	06/03/2015 (6)	06:46:55.070000	16.862	11927_TRA_Data, 06:46:51 (23.9 sec)	0.513	0.017	0.0659	0.0024	0.55418			0.05657	0.0008	0.37176	0.0224	0.0015	no value	NAN	420	11	411	14	448	29	443	31	1380	nan	82	nan	544	nan	468	nan	920	nan	1794	nan	1	nan	15.1745	0.552638	-4	nan	936922085653745	nan	s71226120373_91
s71226120373_92	11928_TRA_Data	06/03/2015 (6) 06:48:14.16	06/03/2015 (6)	06:48:14.160000	15.283	11928_TRA_Data, 06:48:14 (24.5 sec)	3.143	0.094	0.248	0.0083	0.58288			0.09203	0.00081	0.46406	0.0737	0.0046	no value	NAN	1440	23	1426	43	1436	86	1455	17	2131	nan	198	nan	196	nan	236	nan	117	nan	744	nan	2	nan	4.03226	0.134951	0	nan	1411607351405530	nan	s71226120373_92
s71226120373_93	11929_TRA_Data	06/03/2015 (6) 06:49:37.46	06/03/2015 (6)	06:49:37.460000	6.7463	11929_TRA_Data, 06:49:37 (25.7 sec)	0.535	0.022	0.0659	0.0023	0.56433			0.0599	0.0013	0.5405	0.0197	0.0015	no value	NAN	435	13	411	14	393	30	566	38	1581	nan	100	nan	369	nan	712	nan	755	nan	1257	nan	1	nan	15.1745	0.529611	24	nan	1217931590290630	nan	s71226120373_93
s71226120373_94	11930_TRA_Data	06/03/2015 (6) 06:51:07.80	06/03/2015 (6)	06:51:07.800000	16.883	11930_TRA_Data, 06:51:00 (25.1 sec)	4.33	0.13	0.2925	0.0097	0.62254			0.10663	0.00079	0.54443	0.095	0.0056	no value	NAN	1696	25	1652	50	1830	110	1737	13	2888	nan	318	nan	207	nan	288	nan	121	nan	1017	nan	2	nan	3.4188	0.113376	4	nan	1980185567162550	nan	s71226120373_94
s71226120373_95	11932_TRA_Data	06/03/2015 (6) 06:53:46.19	06/03/2015 (6)	06:53:46.190000	14.333	11932_TRA_Data, 06:53:46 (25.4 sec)	3.16	0.096	0.2428	0.0082	0.59276			0.09437	0.00097	0.39385	0.0682	0.0046	no value	NAN	1446	24	1401	42	1332	86	1503	19	1322	nan	125	nan	115	nan	139	nan	65	nan	379	nan	2	nan	4.11862	0.139097	4	nan	807616276602072	nan	s71226120373_95
s71226120373_96	11933_TRA_Data	06/03/2015 (6) 06:55:18.56	06/03/2015 (6)	06:55:18.560000	15.121	11933_TRA_Data, 06:55:08 (25.8 sec)	2.266	0.069	0.1996	0.0068	0.49268			0.08177	0.00083	0.35724	0.069	0.0041	no value	NAN	1198	22	1172	36	1345	79	1218	20	879	nan	74	nan	86	nan	102	nan	50	nan	322	nan	2	nan	5.01002	0.170682	0	nan	479904571156041	nan	s71226120373_96
s71226120373_97	11934_TRA_Data	06/03/2015 (6) 06:56:31.42	06/03/2015 (6)	06:56:31.420000	10.057	11934_TRA_Data, 06:56:31 (25.2 sec)	2.122	0.061	0.1961	0.0063	0.6737			0.07898	0.00068	0.4768	0.0618	0.0039	no value	NAN	1152	21	1152	34	1210	75	1157	17	1786	nan	142	nan	244	nan	306	nan	192	nan	1022	nan	2	nan	5.09944	0.163827	-6	nan	1463786114023750	nan	s71226120373_97
s71226120373_98	11935_TRA_Data	06/03/2015 (6) 06:57:56.73	06/03/2015 (6)	06:57:56.730000	15.289	11935_TRA_Data, 06:57:57 (23.9 sec)	4.27	0.13	0.2844	0.0096	0.60456			0.1082	0.001	0.5936	0.1007	0.0076	no value	NAN	1684	25	1611	49	1930	140	1770	16	10062	nan	1109	nan	205	nan	954	nan	90	nan	794	nan	11	nan	3.51617	0.118689	7	nan	5975507345304350	nan	s71226120373_98
s71226120373_99	11936_TRA_Data	06/03/2015 (6) 06:59:29.62	06/03/2015 (6)	06:59:29.620000	13.056	11936_TRA_Data, 06:59:18 (24.2 sec)	3.72	0.11	0.2677	0.0089	0.61053			0.10002	0.00077	0.5191	0.0653	0.004	no value	NAN	1574	24	1527	45	1276	76	1617	14	2901	nan	295	nan	1313	nan	290	nan	1065	nan	6282	nan	0	nan	3.73552	0.124192	4	nan	2979238703075960	nan	s71226120373_99
s71226120373_100	11937_TRA_Data	06/03/2015 (6) 07:00:42.09	06/03/2015 (6)	07:00:42.090000	25.594	11937_TRA_Data, 07:00:42 (25.5 sec)	2.132	0.076	0.1956	0.007	0.25189			0.0801	0.0018	0.405	0.0641	0.0043	no value	NAN	1144	25	1148	37	1251	82	1086	47	188	nan	15	nan	31	nan	26	nan	24	nan	130	nan	1	nan	5.11247	0.182962	2	nan	129479782083013	nan	s71226120373_100
s71226120373_101	11938_TRA_Data	06/03/2015 (6) 07:02:04.92	06/03/2015 (6)	07:02:04.920000	17.488	11938_TRA_Data, 07:02:05 (25.7 sec)	3.32	0.097	0.2576	0.0085	0.60929			0.09329	0.00091	0.4976	0.0785	0.0048	no value	NAN	1483	24	1476	43	1528	90	1480	19	1596	nan	155	nan	177	nan	174	nan	103	nan	713	nan	2	nan	3.88199	0.128093	-5	nan	1078575964807880	nan	s71226120373_101
s71226120373_102	11939_TRA_Data	06/03/2015 (6) 07:03:28.06	06/03/2015 (6)	07:03:28.060000	24.619	11939_TRA_Data, 07:03:28 (24.6 sec)	3.06	0.095	0.2474	0.0085	0.39797			0.0896	0.0012	0.46557	0.0774	0.0048	no value	NAN	1415	24	1423	44	1506	91	1387	25	686	nan	62	nan	253	nan	72	nan	155	nan	1054	nan	0	nan	4.04204	0.138874	-12	nan	558458100854314	nan	s71226120373_102
s71226120373_103	11940_TRA_Data	06/03/2015 (6) 07:04:51.03	06/03/2015 (6)	07:04:51.030000	24.653	11940_TRA_Data, 07:04:51 (24.6 sec)	1.8	0.057	0.1748	0.006	0.42492			0.0751	0.0011	0.44007	0.0573	0.0036	no value	NAN	1042	21	1038	33	1124	69	1027	28	687	nan	51	nan	206	nan	98	nan	156	nan	775	nan	1	nan	5.72082	0.196367	-22	nan	492035038260762	nan	s71226120373_103
s71226120373_104	11947_TRA_Data	06/03/2015 (6) 07:14:47.86	06/03/2015 (6)	07:14:47.860000	24.821	11947_TRA_Data, 07:14:48 (24.8 sec)	2.706	0.086	0.2291	0.0079	0.013327			0.0856	0.0012	0.057326	0.0757	0.0049	no value	NAN	1320	24	1329	41	1471	92	1281	28	503	nan	44	nan	65	nan	50	nan	32	nan	227	nan	2	nan	4.36491	0.150514	-14	nan	282944536505573	nan	s71226120373_104
s71226120373_105	11948_TRA_Data	06/03/2015 (6) 07:16:20.03	06/03/2015 (6)	07:16:20.030000	12.229	11948_TRA_Data, 07:16:10 (26.4 sec)	12.99	0.36	0.494	0.016	0.75733			0.1883	0.0013	0.35987	0.1585	0.0085	no value	NAN	2674	29	2582	70	2970	150	2723	11	4565	nan	899	nan	1080	nan	220	nan	323	nan	4570	nan	1	nan	2.02429	0.0655641	5	nan	3388859760025640	nan	s71226120373_105
s71226120373_106	11949_TRA_Data	06/03/2015 (6) 07:17:32.16	06/03/2015 (6)	07:17:32.160000	24.518	11949_TRA_Data, 07:17:32 (24.5 sec)	12.88	0.39	0.502	0.017	0.56522			0.1857	0.0018	0.54337	0.1516	0.0096	no value	NAN	2663	29	2619	74	2840	170	2690	16	767	nan	146	nan	115	nan	45	nan	37	nan	499	nan	1	nan	1.99203	0.0674592	2	nan	621013670424896	nan	s71226120373_106
s71226120373_107	11950_TRA_Data	06/03/2015 (6) 07:18:55.60	06/03/2015 (6)	07:18:55.600000	24.082	11950_TRA_Data, 07:18:56 (24 sec)	3.79	0.11	0.2722	0.0092	0.45308			0.1009	0.0011	0.49211	0.082	0.0051	no value	NAN	1586	24	1552	47	1592	96	1624	19	1141	nan	119	nan	242	nan	109	nan	120	nan	902	nan	1	nan	3.67377	0.124169	2	nan	779593925736097	nan	s71226120373_107
s71226120373_108	11951_TRA_Data	06/03/2015 (6) 07:20:18.62	06/03/2015 (6)	07:20:18.620000	26.064	11951_TRA_Data, 07:20:19 (26 sec)	3.33	0.1	0.2565	0.0088	0.51563			0.0937	0.0011	0.47149	0.079	0.005	no value	NAN	1481	24	1470	45	1534	94	1479	22	548	nan	52	nan	82	nan	66	nan	53	nan	373	nan	1	nan	3.89864	0.133754	-6	nan	423340443429596	nan	s71226120373_108
s71226120373_109	11952_TRA_Data	06/03/2015 (6) 07:21:42.05	06/03/2015 (6)	07:21:42.050000	25.627	11952_TRA_Data, 07:21:42 (25.6 sec)	1.789	0.055	0.173	0.0059	0.46484			0.07477	0.00083	0.44177	0.0547	0.0034	no value	NAN	1038	20	1028	32	1076	66	1038	23	947	nan	74	nan	149	nan	189	nan	146	nan	717	nan	1	nan	5.78035	0.197133	-15	nan	809892706749511	nan	s71226120373_109
s71226120373_110	11953_TRA_Data	06/03/2015 (6) 07:23:12.01	06/03/2015 (6)	07:23:12.010000	17.671	11953_TRA_Data, 07:23:04 (25.5 sec)	1.81	0.056	0.1722	0.0059	0.28637			0.07593	0.00099	0.53124	0.0599	0.0037	no value	NAN	1045	20	1023	32	1175	70	1073	27	982	nan	74	nan	78	nan	140	nan	54	nan	302	nan	2	nan	5.8072	0.198969	-9	nan	557056639687178	nan	s71226120373_110
s71226120373_111	11954_TRA_Data	06/03/2015 (6) 07:24:27.09	06/03/2015 (6)	07:24:27.090000	24.586	11954_TRA_Data, 07:24:27 (24.5 sec)	3.009	0.095	0.2407	0.0083	0.44443			0.0907	0.0012	0.41107	0.0745	0.0049	no value	NAN	1401	24	1389	43	1447	91	1407	26	453	nan	42	nan	37	nan	59	nan	28	nan	190	nan	2	nan	4.15455	0.14326	-7	nan	333228333403665	nan	s71226120373_111
s71226120373_112	11955_TRA_Data	06/03/2015 (6) 07:25:50.09	06/03/2015 (6)	07:25:50.090000	24.586	11955_TRA_Data, 07:25:50 (24.5 sec)	5.51	0.17	0.343	0.012	0.59381			0.11577	0.00097	0.55555	0.0963	0.006	no value	NAN	1898	26	1899	56	1860	110	1883	15	2611	nan	311	nan	493	nan	202	nan	212	nan	1882	nan	1	nan	2.91545	0.101998	-2	nan	1686549940675010	nan	s71226120373_112
s71226120373_113	11956_TRA_Data	06/03/2015 (6) 07:27:13.55	06/03/2015 (6)	07:27:13.550000	26.131	11956_TRA_Data, 07:27:14 (26.1 sec)	6.37	0.19	0.369	0.013	0.62052			0.1249	0.0011	0.51608	0.1081	0.0067	no value	NAN	2024	27	2021	59	2070	120	2016	15	1290	nan	165	nan	244	nan	110	nan	110	nan	1115	nan	1	nan	2.71003	0.0954752	-2	nan	997601253644550	nan	s71226120373_113
s71226120373_114	11957_TRA_Data	06/03/2015 (6) 07:28:36.03	06/03/2015 (6)	07:28:36.030000	11.407	11957_TRA_Data, 07:28:36 (26 sec)	4.49	0.13	0.2953	0.0098	0.65495			0.11109	0.00091	0.396	0.087	0.0059	no value	NAN	1725	25	1664	48	1680	110	1809	15	3014	nan	340	nan	541	nan	353	nan	316	nan	2446	nan	1	nan	3.38639	0.112383	6	nan	2656936578314480	nan	s71226120373_114
s71226120373_115	11958_TRA_Data	06/03/2015 (6) 07:29:58.39	06/03/2015 (6)	07:29:58.390000	25.291	11958_TRA_Data, 07:29:58 (25.2 sec)	2.147	0.066	0.1987	0.0068	0.4404			0.07822	0.00095	0.46679	0.0619	0.0039	no value	NAN	1159	21	1167	36	1212	74	1127	24	596	nan	47	nan	71	nan	104	nan	60	nan	349	nan	2	nan	5.03271	0.172232	-16	nan	499938980831221	nan	s71226120373_115
s71226120373_116	11959_TRA_Data	06/03/2015 (6) 07:31:21.83	06/03/2015 (6)	07:31:21.830000	18.697	11959_TRA_Data, 07:31:22 (24.8 sec)	3.76	0.11	0.2703	0.0093	0.53719			0.10103	0.00087	0.499	0.0829	0.0054	no value	NAN	1581	24	1539	47	1610	100	1630	16	2452	nan	249	nan	232	nan	291	nan	150	nan	1184	nan	2	nan	3.69959	0.127289	4	nan	1868374016984450	nan	s71226120373_116
s71226120373_117	11960_TRA_Data	06/03/2015 (6) 07:32:49.83	06/03/2015 (6)	07:32:49.830000	21.849	11960_TRA_Data, 07:32:45 (26.4 sec)	28.83	0.89	0.707	0.024	0.62256			0.2931	0.0037	0.24129	0.193	0.012	no value	NAN	3443	36	3440	90	3560	200	3423	22	1669	nan	535	nan	220	nan	82	nan	60	nan	1106	nan	1	nan	1.41443	0.0480145	-1	nan	1630068557044660	nan	s71226120373_117
s71226120373_118	11967_TRA_Data	06/03/2015 (6) 07:42:50.66	06/03/2015 (6)	07:42:50.660000	18.016	11967_TRA_Data, 07:42:43 (26 sec)	13.48	0.4	0.516	0.017	0.69229			0.1879	0.0013	0.55897	0.1543	0.0092	no value	NAN	2712	28	2682	73	2900	160	2716	12	2749	nan	528	nan	319	nan	167	nan	104	nan	1557	nan	2	nan	1.93798	0.0638483	1	nan	2305533524511600	nan	s71226120373_118
s71226120373_119	11968_TRA_Data	06/03/2015 (6) 07:44:05.09	06/03/2015 (6)	07:44:05.090000	24.586	11968_TRA_Data, 07:44:05 (24.5 sec)	13.3	0.4	0.516	0.018	0.6293			0.1868	0.0017	0.54381	0.1382	0.0087	no value	NAN	2696	28	2677	75	2610	160	2702	15	815	nan	160	nan	139	nan	70	nan	78	nan	974	nan	1	nan	1.93798	0.0676041	0	nan	1017251152310460	nan	s71226120373_119
s71226120373_120	11969_TRA_Data	06/03/2015 (6) 07:45:27.78	06/03/2015 (6)	07:45:27.780000	26.904	11969_TRA_Data, 07:45:28 (26.9 sec)	2.909	0.09	0.2395	0.0082	0.43429			0.0883	0.0011	0.4812	0.0701	0.0045	no value	NAN	1379	24	1382	43	1367	85	1355	24	518	nan	46	nan	59	nan	69	nan	41	nan	274	nan	2	nan	4.17537	0.142956	-11	nan	403761202431263	nan	s71226120373_120
s71226120373_121	11970_TRA_Data	06/03/2015 (6) 07:46:49.90	06/03/2015 (6)	07:46:49.900000	10.616	11970_TRA_Data, 07:46:50 (26.9 sec)	14.5	0.43	0.526	0.017	0.77623			0.2004	0.0014	0.37149	0.174	0.011	no value	NAN	2777	28	2717	73	3230	190	2818	11	3511	nan	716	nan	181	nan	281	nan	61	nan	982	nan	5	nan	1.90114	0.0614437	3	nan	3790878776515260	nan	s71226120373_121
s71226120373_122	11971_TRA_Data	06/03/2015 (6) 07:48:12.81	06/03/2015 (6)	07:48:12.810000	26.87	11971_TRA_Data, 07:48:13 (26.8 sec)	1.994	0.063	0.1848	0.0063	0.40808			0.0783	0.001	0.44722	0.0611	0.004	no value	NAN	1107	21	1093	35	1195	76	1118	28	416	nan	35	nan	33	nan	82	nan	30	nan	167	nan	3	nan	5.41125	0.184475	-17	nan	357377623621509	nan	s71226120373_122
s71226120373_123	11972_TRA_Data	06/03/2015 (6) 07:49:35.47	06/03/2015 (6)	07:49:35.470000	27.206	11972_TRA_Data, 07:49:35 (27.2 sec)	1.715	0.052	0.172	0.0058	0.47067			0.07212	0.00075	0.46323	0.0517	0.0041	no value	NAN	1011	20	1023	32	1006	77	963	21	1001	nan	71	nan	10	nan	215	nan	11	nan	50	nan	19	nan	5.81395	0.196052	-30	nan	793756885803140	nan	s71226120373_123
s71226120373_124	11973_TRA_Data	06/03/2015 (6) 07:50:58.96	06/03/2015 (6)	07:50:58.960000	24.72	11973_TRA_Data, 07:50:59 (24.7 sec)	4.88	0.15	0.311	0.011	0.64617			0.11331	0.00097	0.49463	0.0895	0.0055	no value	NAN	1793	25	1742	52	1730	100	1842	16	1407	nan	160	nan	564	nan	137	nan	299	nan	2503	nan	0	nan	3.21543	0.113729	4	nan	1301070494510850	nan	s71226120373_124
s71226120373_125	11974_TRA_Data	06/03/2015 (6) 07:52:22.21	06/03/2015 (6)	07:52:22.210000	26.467	11974_TRA_Data, 07:52:22 (26.4 sec)	4.6	0.14	0.31	0.011	0.49059			0.1076	0.0011	0.51753	0.0915	0.0058	no value	NAN	1745	25	1736	52	1770	110	1737	19	811	nan	90	nan	89	nan	93	nan	53	nan	453	nan	2	nan	3.22581	0.114464	-2	nan	674109919721524	nan	s71226120373_125
s71226120373_126	11975_TRA_Data	06/03/2015 (6) 07:53:44.88	06/03/2015 (6)	07:53:44.880000	23.679	11975_TRA_Data, 07:53:45 (25.7 sec)	10.52	0.31	0.466	0.016	0.59658			0.1633	0.0014	0.49264	0.128	0.008	no value	NAN	2475	28	2462	70	2430	140	2480	14	1267	nan	209	nan	180	nan	90	nan	70	nan	830	nan	1	nan	2.14592	0.0736798	0	nan	1097333398640450	nan	s71226120373_126
s71226120373_127	11976_TRA_Data	06/03/2015 (6) 07:55:16.88	06/03/2015 (6)	07:55:16.880000	16.801	11976_TRA_Data, 07:55:08 (25.4 sec)	2.989	0.09	0.2368	0.008	0.5644			0.09101	0.00081	0.40188	0.0755	0.0045	no value	NAN	1403	23	1368	41	1468	85	1434	17	1145	nan	106	nan	97	nan	137	nan	60	nan	445	nan	2	nan	4.22297	0.142668	2	nan	765400168845337	nan	s71226120373_127
s71226120373_128	11977_TRA_Data	06/03/2015 (6) 07:56:30.83	06/03/2015 (6)	07:56:30.830000	24.854	11977_TRA_Data, 07:56:31 (24.8 sec)	4.36	0.13	0.301	0.01	0.71044			0.10462	0.00076	0.45278	0.0926	0.0058	no value	NAN	1700	25	1694	51	1790	110	1699	13	4522	nan	483	nan	295	nan	596	nan	199	nan	1732	nan	3	nan	3.32226	0.110374	-1	nan	4061275640032400	nan	s71226120373_128
s71226120373_129	11978_TRA_Data	06/03/2015 (6) 07:58:01.35	06/03/2015 (6)	07:58:01.350000	17.332	11978_TRA_Data, 07:57:54 (24.4 sec)	4.25	0.13	0.2928	0.0099	0.40249			0.1047	0.0012	0.50815	0.0963	0.0058	no value	NAN	1680	25	1654	50	1860	110	1688	21	496	nan	53	nan	93	nan	59	nan	55	nan	535	nan	1	nan	3.4153	0.115476	-1	nan	441637178967052	nan	s71226120373_129
s71226120373_130	11979_TRA_Data	06/03/2015 (6) 07:59:24.66	06/03/2015 (6)	07:59:24.660000	17.023	11979_TRA_Data, 07:59:17 (24.7 sec)	3.161	0.096	0.2429	0.0081	0.4037			0.09388	0.00098	0.50559	0.0798	0.0049	no value	NAN	1445	23	1401	42	1549	92	1492	19	928	nan	92	nan	55	nan	147	nan	51	nan	400	nan	3	nan	4.11692	0.137287	3	nan	826915482235357	nan	s71226120373_130
s71226120373_131	11980_TRA_Data	06/03/2015 (6) 08:00:40.11	06/03/2015 (6)	08:00:40.110000	26.568	11980_TRA_Data, 08:00:40 (26.5 sec)	1.877	0.061	0.181	0.0063	0.27831			0.0759	0.0013	0.46695	0.0545	0.0034	no value	NAN	1066	22	1071	34	1073	66	1028	35	225	nan	17	nan	81	nan	53	nan	94	nan	488	nan	1	nan	5.52486	0.192302	-33	nan	286693595447546	nan	s71226120373_131
s71226120373_132	11987_TRA_Data	06/03/2015 (6) 08:10:36.85	06/03/2015 (6)	08:10:36.850000	9.8585	11987_TRA_Data, 08:10:37 (25.8 sec)	11.47	0.35	0.467	0.014	0.64884			0.1787	0.0022	0.41411	0.1238	0.0073	no value	NAN	2555	44	2463	69	2360	130	2630	25	1605	nan	288	nan	462	nan	266	nan	385	nan	4342	nan	1	nan	2.14133	0.064194	6	nan	3913628204198440	nan	s71226120373_132
s71226120373_133	11988_TRA_Data	06/03/2015 (6) 08:12:00.29	06/03/2015 (6)	08:12:00.290000	25.392	11988_TRA_Data, 08:12:00 (25.3 sec)	5.16	0.16	0.325	0.011	0.58311			0.1149	0.001	0.5326	0.097	0.0061	no value	NAN	1841	26	1810	54	1870	110	1865	17	876	nan	103	nan	122	nan	184	nan	127	nan	1143	nan	1	nan	3.07692	0.104142	1	nan	1399341220815060	nan	s71226120373_133
s71226120373_134	11989_TRA_Data	06/03/2015 (6) 08:13:22.72	06/03/2015 (6)	08:13:22.720000	24.955	11989_TRA_Data, 08:13:23 (24.9 sec)	3.34	0.1	0.257	0.0087	0.57869			0.09408	0.00085	0.50444	0.0782	0.0049	no value	NAN	1488	24	1472	45	1519	91	1494	17	628	nan	61	nan	69	nan	176	nan	97	nan	721	nan	2	nan	3.89105	0.13172	-1	nan	1092734659341010	nan	s71226120373_134
s71226120373_135	11990_TRA_Data	06/03/2015 (6) 08:14:45.86	06/03/2015 (6)	08:14:45.860000	24.821	11990_TRA_Data, 08:14:46 (24.8 sec)	0.501	0.017	0.0655	0.0023	0.31584			0.05571	0.00096	0.44073	0.0208	0.0013	no value	NAN	410	11	409	14	417	26	387	37	129	nan	7	nan	32	nan	171	nan	213	nan	415	nan	1	nan	15.2672	0.536099	86	nan	300729157044973	nan	s71226120373_135
s71226120373_136	11991_TRA_Data	06/03/2015 (6) 08:16:08.75	06/03/2015 (6)	08:16:08.750000	25.93	11991_TRA_Data, 08:16:09 (25.9 sec)	6.15	0.18	0.365	0.012	0.46045			0.1218	0.0011	0.53399	0.1063	0.0067	no value	NAN	1992	26	2004	59	2040	120	1971	16	487	nan	61	nan	56	nan	121	nan	77	nan	756	nan	2	nan	2.73973	0.0900732	-3	nan	999416170473164	nan	s71226120373_136
s71226120373_137	11992_TRA_Data	06/03/2015 (6) 08:17:31.56	06/03/2015 (6)	08:17:31.560000	25.123	11992_TRA_Data, 08:17:32 (25.1 sec)	4.01	0.12	0.287	0.0099	0.49032			0.1011	0.0012	0.48458	0.0862	0.0054	no value	NAN	1628	25	1623	49	1670	100	1622	22	180	nan	19	nan	43	nan	65	nan	79	nan	661	nan	1	nan	3.48432	0.120191	-4	nan	500352234916394	nan	s71226120373_137
s71226120373_138	11993_TRA_Data	06/03/2015 (6) 08:18:53.78	06/03/2015 (6)	08:18:53.780000	25.896	11993_TRA_Data, 08:18:54 (25.8 sec)	7.93	0.25	0.363	0.013	0.84881			0.1574	0.0012	0.25907	0.0999	0.0062	no value	NAN	2210	29	1989	61	1920	110	2420	12	1339	nan	216	nan	154	nan	386	nan	240	nan	2308	nan	1	nan	2.75482	0.0986575	17	nan	3736325005896890	nan	s71226120373_138
s71226120373_139	11994_TRA_Data	06/03/2015 (6) 08:20:17.29	06/03/2015 (6)	08:20:17.290000	25.392	11994_TRA_Data, 08:20:17 (25.3 sec)	4.16	0.12	0.295	0.01	0.63682			0.10219	0.00084	0.47575	0.086	0.0054	no value	NAN	1663	24	1666	50	1670	100	1653	15	719	nan	73	nan	41	nan	277	nan	86	nan	702	nan	3	nan	3.38983	0.114909	-2	nan	1858718458566490	nan	s71226120373_139
s71226120373_140	11995_TRA_Data	06/03/2015 (6) 08:21:45.87	06/03/2015 (6)	08:21:45.870000	19.809	11995_TRA_Data, 08:21:41 (24.6 sec)	3.74	0.11	0.2701	0.0092	0.3964			0.1	0.0011	0.50794	0.0839	0.0052	no value	NAN	1575	25	1539	47	1625	97	1601	21	193	nan	20	nan	39	nan	73	nan	73	nan	594	nan	1	nan	3.70233	0.126107	1	nan	513149748733320	nan	s71226120373_140
s71226120373_141	11996_TRA_Data	06/03/2015 (6) 08:23:03.56	06/03/2015 (6)	08:23:03.560000	24.115	11996_TRA_Data, 08:23:04 (24.1 sec)	2.807	0.088	0.2268	0.0077	0.46939			0.0891	0.0011	0.40365	0.0692	0.0044	no value	NAN	1351	23	1316	41	1352	84	1382	24	151	nan	13	nan	17	nan	79	nan	46	nan	309	nan	2	nan	4.40917	0.149694	-1	nan	433887524664684	nan	s71226120373_141
s71226120373_142	11997_TRA_Data	06/03/2015 (6) 08:24:27.05	06/03/2015 (6)	08:24:27.050000	25.627	11997_TRA_Data, 08:24:27 (25.6 sec)	1.932	0.064	0.1864	0.0065	0.30954			0.0757	0.0013	0.39822	0.0572	0.0038	no value	NAN	1087	22	1100	35	1120	72	1039	35	79	nan	6	nan	8	nan	61	nan	37	nan	191	nan	2	nan	5.36481	0.187078	-29	nan	275002650492370	nan	s71226120373_142
[truncated: 4 more columns]

## Sheet: 7122-6-1-2040m
	Source file	DateTime	Date	Time	Duration(s)	Comments	Final207_235	Final207_235_Prop2SE	Final206_238	Final206_238_Prop2SE	ErrorCorrelation_6_38vs7_35	Final238_206	Final238_206_Prop2SE	Final207_206	Final207_206_Prop2SE	ErrorCorrelation_38_6vs7_6	Final208_232	Final208_232_Prop2SE	Final206_208	Final206_208_Prop2SE	FinalAge207_235	FinalAge207_235_Prop2SE	FinalAge206_238	FinalAge206_238_Prop2SE	FinalAge208_232	FinalAge208_232_Prop2SE	FinalAge207_206	FinalAge207_206_Prop2SE	Final206_204	Final206_204_Prop2SE	Final207_204	Final207_204_Prop2SE	Final208_204	Final208_204_Prop2SE	Approx_U_PPM	Approx_U_PPM_Prop2SE	Approx_Th_PPM	Approx_Th_PPM_Prop2SE	Approx_Pb_PPM	Approx_Pb_PPM_Prop2SE	FInal_U_Th_Ratio	FInal_U_Th_Ratio_Prop2SE	Final238_206	Final238_206_Prop2SE	FinalDiscPercent	FinalDiscPercent_Prop2SE	Dose	Dose_Prop2SE
Z_GJ1_1	12006_TRA_Data	06/03/2015 (6) 11:18:05.38	06/03/2015 (6)	11:18:05.380000	22.301	12006_TRA_Data, 11:18:05 (22.3 sec)	0.788	0.028	0.0962	0.0036	0.55363			0.05941	0.00075	0.51482	0.031	0.027	no value	NAN	589	16	591	21	620	540	557	28	327	nan	20	nan	1	nan	307	nan	9	nan	27	nan	34	nan	10.395	0.389002	3	nan	622769219517418	nan
Z_GJ1_2	12007_TRA_Data	06/03/2015 (6) 11:19:25.19	06/03/2015 (6)	11:19:25.190000	25.493	12007_TRA_Data, 11:19:25 (25.4 sec)	0.827	0.03	0.099	0.0037	0.50496			0.06062	0.00076	0.47764	0.028	0.025	no value	NAN	611	16	608	22	560	490	601	27	288	nan	18	nan	1	nan	302	nan	9	nan	24	nan	33	nan	10.101	0.377512	-28	nan	638163883341152	nan
Z_GJ1_3	12026_TRA_Data	06/03/2015 (6) 11:45:40.11	06/03/2015 (6)	11:45:40.110000	26.568	12026_TRA_Data, 11:45:40 (26.5 sec)	0.827	0.03	0.0992	0.0037	0.49727			0.06072	0.00074	0.52488	0.031	0.027	no value	NAN	611	17	609	22	610	530	609	26	201	nan	13	nan	0	nan	312	nan	9	nan	26	nan	34	nan	10.0807	0.375992	-10	nan	650332202489509	nan
Z_GJ1_4	12027_TRA_Data	06/03/2015 (6) 11:47:02.26	06/03/2015 (6)	11:47:02.260000	24.418	12027_TRA_Data, 11:47:02 (24.4 sec)	0.817	0.029	0.0986	0.0037	0.47308			0.06008	0.00078	0.56564	0.031	0.027	no value	NAN	605	16	606	21	610	530	588	29	251	nan	16	nan	1	nan	303	nan	9	nan	25	nan	33	nan	10.142	0.380582	-12	nan	633202719789159	nan
Z_GJ1_5	12046_TRA_Data	06/03/2015 (6) 12:13:17.56	06/03/2015 (6)	12:13:17.560000	25.123	12046_TRA_Data, 12:13:18 (25.1 sec)	0.84	0.03	0.1012	0.0038	0.40207			0.05976	0.00083	0.4858	0.031	0.027	no value	NAN	618	17	621	22	620	530	574	30	178	nan	12	nan	0	nan	298	nan	9	nan	25	nan	33	nan	9.88142	0.371042	2	nan	644449282360986	nan
Z_GJ1_6	12047_TRA_Data	06/03/2015 (6) 12:14:40.42	06/03/2015 (6)	12:14:40.420000	25.258	12047_TRA_Data, 12:14:40 (25.2 sec)	0.808	0.029	0.0977	0.0037	0.5303			0.05982	0.00077	0.58259	0.03	0.026	no value	NAN	600	16	600	22	590	520	568	28	234	nan	15	nan	1	nan	301	nan	9	nan	24	nan	34	nan	10.2354	0.387626	-8	nan	622100449955895	nan
Z_GJ1_7	12066_TRA_Data	06/03/2015 (6) 12:40:55.92	06/03/2015 (6)	12:40:55.920000	25.762	12066_TRA_Data, 12:40:56 (25.7 sec)	0.819	0.029	0.0989	0.0037	0.53845			0.05989	0.00074	0.51975	0.03	0.026	no value	NAN	605	16	607	22	590	510	578	27	187	nan	12	nan	0	nan	308	nan	9	nan	25	nan	34	nan	10.1112	0.378276	-2	nan	645411517549220	nan
Z_GJ1_8	12067_TRA_Data	06/03/2015 (6) 12:42:18.41	06/03/2015 (6)	12:42:18.410000	26.266	12067_TRA_Data, 12:42:18 (26.2 sec)	0.827	0.03	0.0999	0.0037	0.57034			0.06013	0.00073	0.51673	0.032	0.028	no value	NAN	610	16	613	22	620	540	586	27	236	nan	15	nan	1	nan	298	nan	9	nan	25	nan	34	nan	10.01	0.370741	14	nan	625853192303926	nan
Z_GJ1_9	12086_TRA_Data	06/03/2015 (6) 13:08:32.32	06/03/2015 (6)	13:08:32.320000	25.358	12086_TRA_Data, 13:08:32 (25.3 sec)	0.844	0.031	0.1012	0.0038	0.55749			0.06042	0.00076	0.40046	0.031	0.027	no value	NAN	620	17	621	22	620	530	589	27	145	nan	9	nan	0	nan	293	nan	9	nan	25	nan	33	nan	9.88142	0.371042	-17	nan	631222011942610	nan
Z_GJ1_10	12087_TRA_Data	06/03/2015 (6) 13:09:54.92	06/03/2015 (6)	13:09:54.920000	25.762	12087_TRA_Data, 13:09:55 (25.7 sec)	0.83	0.03	0.1	0.0037	0.51587			0.06003	0.00075	0.52224	0.031	0.027	no value	NAN	613	16	614	22	620	530	581	27	249	nan	16	nan	1	nan	292	nan	9	nan	25	nan	33	nan	10	0.37	10	nan	621818920664003	nan
Z_GJ1_11	12106_TRA_Data	06/03/2015 (6) 13:36:14.03	06/03/2015 (6)	13:36:14.030000	24.653	12106_TRA_Data, 13:36:14 (24.6 sec)	0.824	0.029	0.0985	0.0036	0.5253			0.06048	0.00072	0.47016	0.031	0.027	no value	NAN	608	16	605	21	610	530	603	27	207	nan	13	nan	1	nan	302	nan	9	nan	25	nan	33	nan	10.1523	0.371048	-25	nan	636541882456222	nan
Z_GJ1_12	12107_TRA_Data	06/03/2015 (6) 13:37:35.76	06/03/2015 (6)	13:37:35.760000	24.922	12107_TRA_Data, 13:37:36 (24.9 sec)	0.827	0.03	0.0987	0.0037	0.53092			0.06072	0.00078	0.50038	0.031	0.027	no value	NAN	611	16	606	22	620	530	615	27	208	nan	12	nan	1	nan	298	nan	9	nan	25	nan	33	nan	10.1317	0.379811	-23	nan	630786048523217	nan
Z_GJ1_13	12126_TRA_Data	06/03/2015 (6) 14:03:59.25	06/03/2015 (6)	14:03:59.250000	25.426	12126_TRA_Data, 14:03:59 (25.4 sec)	0.831	0.03	0.0989	0.0037	0.56083			0.06088	0.00079	0.4692	0.03	0.027	no value	NAN	612	17	608	21	600	520	603	28	232	nan	15	nan	1	nan	291	nan	9	nan	25	nan	33	nan	10.1112	0.378276	-20	nan	615991361235326	nan
Z_GJ1_14	12127_TRA_Data	06/03/2015 (6) 14:05:21.32	06/03/2015 (6)	14:05:21.320000	25.358	12127_TRA_Data, 14:05:21 (25.3 sec)	0.818	0.029	0.0989	0.0037	0.47945			0.05997	0.00076	0.42893	0.03	0.026	no value	NAN	604	16	608	22	600	520	576	27	134	nan	9	nan	0	nan	299	nan	9	nan	24	nan	33	nan	10.1112	0.378276	-1	nan	632825753291176	nan
Z_GJ1_15	12146_TRA_Data	06/03/2015 (6) 14:33:25.01	06/03/2015 (6)	14:33:25.010000	26.669	12146_TRA_Data, 14:33:25 (26.6 sec)	0.816	0.03	0.099	0.0037	0.4774			0.05976	0.00077	0.54907	0.032	0.028	no value	NAN	604	16	608	22	630	550	578	28	204	nan	13	nan	1	nan	303	nan	9	nan	25	nan	35	nan	10.101	0.377512	-16	nan	631793867567299	nan
Z_GJ1_16	12147_TRA_Data	06/03/2015 (6) 14:34:47.71	06/03/2015 (6)	14:34:47.710000	26.971	12147_TRA_Data, 14:34:48 (26.9 sec)	0.85	0.031	0.1031	0.0038	0.50074			0.05971	0.00074	0.48938	0.032	0.028	no value	NAN	624	17	632	22	630	540	573	27	151	nan	10	nan	1	nan	288	nan	9	nan	25	nan	33	nan	9.69932	0.357492	-29	nan	643486787872626	nan
Z_GJ1_17	12166_TRA_Data	06/03/2015 (6) 15:01:22.16	06/03/2015 (6)	15:01:22.160000	24.518	12166_TRA_Data, 15:01:22 (24.5 sec)	0.814	0.029	0.098	0.0037	0.54294			0.06004	0.00081	0.52191	0.029	0.026	no value	NAN	604	16	602	21	580	500	581	30	108	nan	7	nan	0	nan	294	nan	9	nan	24	nan	33	nan	10.2041	0.385256	-14	nan	622428457827758	nan
Z_GJ1_18	12167_TRA_Data	06/03/2015 (6) 15:02:44.13	06/03/2015 (6)	15:02:44.130000	24.552	12167_TRA_Data, 15:02:44 (24.5 sec)	0.812	0.029	0.0973	0.0036	0.43883			0.06055	0.0008	0.53275	0.03	0.026	no value	NAN	602	17	597	21	590	510	601	28	257	nan	15	nan	1	nan	307	nan	9	nan	26	nan	33	nan	10.2775	0.380257	-4	nan	634764701738948	nan
Z_GJ1_19	12186_TRA_Data	06/03/2015 (6) 15:29:19.70	06/03/2015 (6)	15:29:19.700000	23.981	12186_TRA_Data, 15:29:20 (23.9 sec)	0.791	0.028	0.0949	0.0036	0.54536			0.0604	0.00078	0.52747	0.032	0.028	no value	NAN	590	16	584	21	630	540	593	28	152	nan	10	nan	1	nan	312	nan	9	nan	26	nan	35	nan	10.5374	0.399733	-15	nan	625401501239967	nan
Z_GJ1_20	12187_TRA_Data	06/03/2015 (6) 15:30:42.41	06/03/2015 (6)	15:30:42.410000	26.266	12187_TRA_Data, 15:30:42 (26.2 sec)	0.834	0.03	0.1009	0.0038	0.49946			0.06002	0.0008	0.48857	0.031	0.027	no value	NAN	614	17	619	22	620	540	574	29	105	nan	7	nan	0	nan	295	nan	9	nan	25	nan	33	nan	9.9108	0.373251	-1	nan	635312762767756	nan
Z_GJ1_21	12206_TRA_Data	06/03/2015 (6) 15:57:18.25	06/03/2015 (6)	15:57:18.250000	25.426	12206_TRA_Data, 15:57:18 (25.4 sec)	0.83	0.03	0.1003	0.0037	0.52472			0.05999	0.00073	0.474	0.03	0.027	no value	NAN	613	16	616	22	600	520	584	27	140	nan	9	nan	0	nan	296	nan	9	nan	24	nan	33	nan	9.97009	0.36779	-29	nan	635074291116802	nan
Z_GJ1_22	12207_TRA_Data	06/03/2015 (6) 15:58:40.72	06/03/2015 (6)	15:58:40.720000	24.955	12207_TRA_Data, 15:58:41 (24.9 sec)	0.823	0.03	0.0994	0.0037	0.56163			0.05966	0.00077	0.46417	0.03	0.027	no value	NAN	607	16	610	22	600	520	573	28	143	nan	9	nan	1	nan	297	nan	9	nan	25	nan	33	nan	10.0604	0.37448	4	nan	634956801577245	nan
Z_GJ1_23	12226_TRA_Data	06/03/2015 (6) 16:25:12.92	06/03/2015 (6)	16:25:12.920000	25.762	12226_TRA_Data, 16:25:13 (25.7 sec)	0.81	0.029	0.0972	0.0036	0.53514			0.06042	0.00076	0.47182	0.031	0.027	no value	NAN	600	16	598	21	620	530	591	27	58	nan	4	nan	0	nan	314	nan	9	nan	26	nan	34	nan	10.2881	0.381039	-23	nan	639973641792517	nan
Z_GJ1_24	12227_TRA_Data	06/03/2015 (6) 16:26:35.04	06/03/2015 (6)	16:26:35.040000	26.635	12227_TRA_Data, 16:26:35 (26.6 sec)	0.85	0.03	0.1025	0.0038	0.48603			0.06008	0.00075	0.52006	0.032	0.028	no value	NAN	623	17	629	22	630	550	584	27	155	nan	10	nan	1	nan	289	nan	9	nan	25	nan	33	nan	9.7561	0.361689	-39	nan	638559220475122	nan
Z_GJ1_25	12246_TRA_Data	06/03/2015 (6) 16:53:07.15	06/03/2015 (6)	16:53:07.150000	25.526	12246_TRA_Data, 16:53:07 (25.5 sec)	0.824	0.029	0.0997	0.0037	0.45287			0.06015	0.00077	0.54636	0.03	0.027	no value	NAN	609	17	613	21	600	520	588	28	92	nan	5	nan	0	nan	302	nan	9	nan	25	nan	33	nan	10.0301	0.37223	-22	nan	642057909505972	nan
Z_GJ1_26	12247_TRA_Data	06/03/2015 (6) 16:54:30.09	06/03/2015 (6)	16:54:30.090000	25.594	12247_TRA_Data, 16:54:30 (25.5 sec)	0.82	0.03	0.0988	0.0037	0.53554			0.06017	0.00078	0.4839	0.031	0.027	no value	NAN	607	16	607	22	610	530	582	28	92	nan	6	nan	0	nan	303	nan	9	nan	26	nan	33	nan	10.1215	0.379042	-34	nan	641958833904792	nan
Z_GJ1_27	12266_TRA_Data	06/03/2015 (6) 17:21:03.36	06/03/2015 (6)	17:21:03.360000	25.325	12266_TRA_Data, 17:21:03 (25.3 sec)	0.792	0.028	0.0969	0.0036	0.72109			0.05967	0.00074	0.51349	0.03	0.026	no value	NAN	590	16	596	21	590	510	568	27	51	nan	3	nan	0	nan	313	nan	9	nan	25	nan	34	nan	10.3199	0.383402	5	nan	635471329622832	nan
Z_GJ1_28	12267_TRA_Data	06/03/2015 (6) 17:22:25.82	06/03/2015 (6)	17:22:25.820000	25.862	12267_TRA_Data, 17:22:26 (25.8 sec)	0.828	0.03	0.1002	0.0037	0.49309			0.06014	0.00074	0.53683	0.03	0.026	no value	NAN	611	16	615	22	590	510	587	27	114	nan	7	nan	0	nan	295	nan	9	nan	24	nan	33	nan	9.98004	0.368524	-22	nan	635250010974640	nan
Z_GJ1_29	12286_TRA_Data	06/03/2015 (6) 17:48:54.13	06/03/2015 (6)	17:48:54.130000	24.552	12286_TRA_Data, 17:48:54 (24.5 sec)	0.811	0.029	0.097	0.0036	0.5961			0.06038	0.00076	0.51117	0.03	0.026	no value	NAN	601	16	596	21	600	520	593	28	79	nan	5	nan	0	nan	305	nan	9	nan	25	nan	33	nan	10.3093	0.382612	0	nan	635382686015692	nan
Z_GJ1_30	12287_TRA_Data	06/03/2015 (6) 17:50:16.95	06/03/2015 (6)	17:50:16.950000	25.728	12287_TRA_Data, 17:50:17 (25.7 sec)	0.833	0.03	0.0997	0.0037	0.58951			0.06047	0.00079	0.49717	0.031	0.027	no value	NAN	614	16	612	22	600	520	598	28	151	nan	9	nan	1	nan	298	nan	9	nan	25	nan	33	nan	10.0301	0.37223	-12	nan	637479559518770	nan
Z_Plesovice_1	12008_TRA_Data	06/03/2015 (6) 11:20:50.05	06/03/2015 (6)	11:20:50.050000	25.627	12008_TRA_Data, 11:20:50 (25.6 sec)	0.389	0.014	0.0528	0.0019	0.52179			0.05323	0.00057	0.47465	0.017	0.015	no value	NAN	333	10	332	12	330	290	317	24	249	nan	13	nan	5	nan	552	nan	79	nan	122	nan	7	nan	18.9394	0.681531	-236	nan	630911568019070	nan
Z_Plesovice_2	12009_TRA_Data	06/03/2015 (6) 11:22:12.46	06/03/2015 (6)	11:22:12.460000	24.216	12009_TRA_Data, 11:22:12 (24.2 sec)	0.446	0.016	0.0494	0.0018	0.35866			0.06519	0.00091	0.37408	0.026	0.022	no value	NAN	373	11	311	11	510	440	743	29	451	nan	29	nan	28	nan	579	nan	108	nan	253	nan	5	nan	20.2429	0.737596	44	nan	629342220175698	nan
Z_Plesovice_3	12028_TRA_Data	06/03/2015 (6) 11:48:27.23	06/03/2015 (6)	11:48:27.230000	24.451	12028_TRA_Data, 11:48:27 (24.4 sec)	0.385	0.014	0.0525	0.0019	0.54608			0.05288	0.00056	0.43026	0.016	0.014	no value	NAN	330	10	330	12	330	290	308	24	223	nan	12	nan	4	nan	547	nan	80	nan	121	nan	7	nan	19.0476	0.689342	67	nan	623207346109384	nan
Z_Plesovice_4	12029_TRA_Data	06/03/2015 (6) 11:49:51.08	06/03/2015 (6)	11:49:51.080000	22.603	12029_TRA_Data, 11:49:51 (22.6 sec)	0.381	0.014	0.0516	0.0019	0.51729			0.05317	0.00059	0.39502	0.017	0.015	no value	NAN	328	10	324	11	330	290	318	25	208	nan	11	nan	6	nan	536	nan	78	nan	121	nan	7	nan	19.3798	0.713599	61	nan	599952810698654	nan
Z_Plesovice_5	12048_TRA_Data	06/03/2015 (6) 12:16:05.12	06/03/2015 (6)	12:16:05.120000	25.56	12048_TRA_Data, 12:16:05 (25.5 sec)	0.389	0.014	0.0531	0.0019	0.48067			0.05321	0.00059	0.48078	0.016	0.014	no value	NAN	333	10	333	12	330	290	317	25	194	nan	10	nan	5	nan	529	nan	79	nan	118	nan	7	nan	18.8324	0.673852	45	nan	608951712317139	nan
Z_Plesovice_6	12049_TRA_Data	06/03/2015 (6) 12:17:26.99	06/03/2015 (6)	12:17:26.990000	25.694	12049_TRA_Data, 12:17:27 (25.6 sec)	0.393	0.014	0.0537	0.002	0.46892			0.05307	0.00059	0.48062	0.016	0.014	no value	NAN	336	10	337	12	330	290	311	25	264	nan	14	nan	7	nan	518	nan	78	nan	115	nan	7	nan	18.622	0.693556	63	nan	604862180834384	nan
Z_Plesovice_7	12068_TRA_Data	06/03/2015 (6) 12:43:42.48	06/03/2015 (6)	12:43:42.480000	26.198	12068_TRA_Data, 12:43:42 (26.1 sec)	0.395	0.014	0.0534	0.0019	0.48539			0.05337	0.00059	0.48305	0.017	0.015	no value	NAN	337	10	335	12	330	290	326	25	246	nan	13	nan	7	nan	531	nan	78	nan	117	nan	7	nan	18.7266	0.666302	49	nan	618078831566638	nan
Z_Plesovice_8	12069_TRA_Data	06/03/2015 (6) 12:45:04.28	06/03/2015 (6)	12:45:04.280000	26.4	12069_TRA_Data, 12:45:04 (26.4 sec)	0.39	0.014	0.0535	0.0019	0.47453			0.05292	0.00058	0.44852	0.017	0.014	no value	NAN	334	10	336	12	330	290	307	25	220	nan	11	nan	5	nan	525	nan	78	nan	115	nan	7	nan	18.6916	0.663813	-36	nan	611968836009734	nan
Z_Plesovice_9	12088_TRA_Data	06/03/2015 (6) 13:11:19.19	06/03/2015 (6)	13:11:19.190000	25.493	12088_TRA_Data, 13:11:19 (25.4 sec)	0.39	0.014	0.0532	0.0019	0.47334			0.05297	0.00058	0.44211	0.016	0.014	no value	NAN	334	10	334	12	320	280	310	24	184	nan	10	nan	4	nan	535	nan	81	nan	117	nan	7	nan	18.797	0.671321	37	nan	620562926644632	nan
Z_Plesovice_10	12089_TRA_Data	06/03/2015 (6) 13:12:41.48	06/03/2015 (6)	13:12:41.480000	26.198	12089_TRA_Data, 13:12:41 (26.1 sec)	0.391	0.014	0.0535	0.0019	0.49453			0.053	0.00058	0.43798	0.017	0.015	no value	NAN	334	10	336	12	330	290	311	24	186	nan	10	nan	4	nan	521	nan	77	nan	114	nan	7	nan	18.6916	0.663813	67	nan	605591071756062	nan
Z_Plesovice_11	12108_TRA_Data	06/03/2015 (6) 13:39:01.30	06/03/2015 (6)	13:39:01.300000	24.384	12108_TRA_Data, 13:39:01 (24.3 sec)	0.379	0.013	0.0519	0.0019	0.50359			0.05257	0.00058	0.43493	0.017	0.015	no value	NAN	325.5	9.9	326	12	330	290	293	24	175	nan	10	nan	4	nan	548	nan	80	nan	121	nan	7	nan	19.2678	0.705373	203	nan	617183786821999	nan
Z_Plesovice_12	12109_TRA_Data	06/03/2015 (6) 13:40:25.94	06/03/2015 (6)	13:40:25.940000	22.738	12109_TRA_Data, 13:40:26 (22.7 sec)	0.386	0.014	0.0527	0.0019	0.4869			0.05296	0.0006	0.44183	0.017	0.015	no value	NAN	331	10	331	12	330	290	307	25	233	nan	13	nan	6	nan	516	nan	77	nan	117	nan	7	nan	18.9753	0.68412	-5	nan	588518586976931	nan
Z_Plesovice_13	12128_TRA_Data	06/03/2015 (6) 14:06:46.19	06/03/2015 (6)	14:06:46.190000	25.493	12128_TRA_Data, 14:06:46 (25.4 sec)	0.391	0.014	0.0526	0.0019	0.48644			0.05385	0.0006	0.47048	0.017	0.015	no value	NAN	334	10	330	12	330	290	343	25	175	nan	10	nan	4	nan	537	nan	80	nan	120	nan	7	nan	19.0114	0.686724	38	nan	611831225034741	nan
Z_Plesovice_14	12129_TRA_Data	06/03/2015 (6) 14:08:11.07	06/03/2015 (6)	14:08:11.070000	23.611	12129_TRA_Data, 14:08:11 (23.6 sec)	0.385	0.014	0.0529	0.0019	0.51264			0.05253	0.00057	0.41963	0.016	0.014	no value	NAN	330	10	332	12	330	290	294	25	239	nan	13	nan	6	nan	515	nan	77	nan	115	nan	7	nan	18.9036	0.678957	22	nan	590769131084667	nan
Z_Plesovice_15	12148_TRA_Data	06/03/2015 (6) 14:36:13.15	06/03/2015 (6)	14:36:13.150000	26.534	12148_TRA_Data, 14:36:13 (26.5 sec)	0.393	0.014	0.0536	0.0019	0.48655			0.05322	0.00058	0.45876	0.017	0.015	no value	NAN	336	10	336	12	330	290	317	24	121	nan	6	nan	3	nan	537	nan	81	nan	120	nan	7	nan	18.6567	0.661339	-4	nan	627947219346383	nan
Z_Plesovice_16	12149_TRA_Data	06/03/2015 (6) 14:37:36.89	06/03/2015 (6)	14:37:36.890000	24.787	12149_TRA_Data, 14:37:37 (24.7 sec)	0.387	0.014	0.0536	0.0019	0.47768			0.05231	0.00057	0.44708	0.017	0.015	no value	NAN	331	10	336	12	330	290	279	24	274	nan	15	nan	7	nan	520	nan	79	nan	116	nan	7	nan	18.6567	0.661339	34	nan	607350450863350	nan
Z_Plesovice_17	12168_TRA_Data	06/03/2015 (6) 15:04:10.01	06/03/2015 (6)	15:04:10.010000	26.669	12168_TRA_Data, 15:04:10 (26.6 sec)	0.386	0.014	0.0532	0.0019	0.49021			0.05253	0.00059	0.45674	0.017	0.014	no value	NAN	331	10	334	12	330	290	293	25	226	nan	12	nan	6	nan	545	nan	80	nan	119	nan	7	nan	18.797	0.671321	164	nan	633638427258766	nan
Z_Plesovice_18	12169_TRA_Data	06/03/2015 (6) 15:05:32.94	06/03/2015 (6)	15:05:32.940000	26.736	12169_TRA_Data, 15:05:33 (26.7 sec)	0.397	0.014	0.0541	0.002	0.45492			0.0532	0.00057	0.46558	0.017	0.014	no value	NAN	338	10	339	12	330	290	319	24	209	nan	12	nan	6	nan	524	nan	77	nan	116	nan	7	nan	18.4843	0.683338	70	nan	618506299393092	nan
Z_Plesovice_19	12188_TRA_Data	06/03/2015 (6) 15:32:08.22	06/03/2015 (6)	15:32:08.220000	25.459	12188_TRA_Data, 15:32:08 (25.4 sec)	0.386	0.014	0.0525	0.0019	0.43648			0.0531	0.0006	0.44301	0.017	0.014	no value	NAN	331	10	330	12	330	290	317	25	168	nan	9	nan	5	nan	552	nan	83	nan	123	nan	7	nan	19.0476	0.689342	19	nan	630763138148550	nan
Z_Plesovice_20	12189_TRA_Data	06/03/2015 (6) 15:33:31.06	06/03/2015 (6)	15:33:31.060000	24.619	12189_TRA_Data, 15:33:31 (24.6 sec)	0.378	0.013	0.0521	0.0019	0.49387			0.05257	0.00057	0.4756	0.016	0.014	no value	NAN	325.3	9.9	327	12	320	280	297	25	121	nan	7	nan	3	nan	551	nan	83	nan	121	nan	7	nan	19.1939	0.699968	-34	nan	622222654899875	nan
Z_Plesovice_21	12208_TRA_Data	06/03/2015 (6) 16:00:05.63	06/03/2015 (6)	16:00:05.630000	24.048	12208_TRA_Data, 16:00:06 (24 sec)	0.37	0.013	0.0505	0.0018	0.48201			0.05265	0.00059	0.49689	0.016	0.014	no value	NAN	318.7	9.7	318	11	330	280	299	25	76	nan	4	nan	2	nan	578	nan	87	nan	129	nan	7	nan	19.802	0.705813	25	nan	634441177611416	nan
Z_Plesovice_22	12209_TRA_Data	06/03/2015 (6) 16:01:28.03	06/03/2015 (6)	16:01:28.030000	24.653	12209_TRA_Data, 16:01:28 (24.6 sec)	0.377	0.013	0.0513	0.0019	0.50724			0.05335	0.00058	0.45579	0.016	0.014	no value	NAN	324.5	9.8	322	11	330	280	324	24	182	nan	10	nan	5	nan	559	nan	82	nan	121	nan	7	nan	19.4932	0.72197	13	nan	620980578680116	nan
Z_Plesovice_23	12228_TRA_Data	06/03/2015 (6) 16:28:01.88	06/03/2015 (6)	16:28:01.880000	22.805	12228_TRA_Data, 16:28:02 (22.8 sec)	0.37	0.013	0.0506	0.0018	0.3087			0.0527	0.00058	0.27445	0.016	0.014	no value	NAN	318.6	9.6	318	11	330	290	295	24	71	nan	4	nan	2	nan	589	nan	88	nan	132	nan	7	nan	19.7629	0.703026	108	nan	647946883976233	nan
Z_Plesovice_24	12229_TRA_Data	06/03/2015 (6) 16:29:21.94	06/03/2015 (6)	16:29:21.940000	26.736	12229_TRA_Data, 16:29:22 (26.7 sec)	0.387	0.014	0.0532	0.0019	0.47834			0.05277	0.00056	0.49319	0.017	0.014	no value	NAN	332	9.9	334	12	330	290	303	24	110	nan	6	nan	3	nan	559	nan	83	nan	123	nan	7	nan	18.797	0.671321	226	nan	649563221585482	nan
Z_Plesovice_25	12248_TRA_Data	06/03/2015 (6) 16:55:54.79	06/03/2015 (6)	16:55:54.790000	24.888	12248_TRA_Data, 16:55:55 (24.8 sec)	0.377	0.013	0.0515	0.0019	0.50161			0.05291	0.00056	0.40587	0.016	0.014	no value	NAN	324.3	9.9	324	11	330	280	307	24	126	nan	7	nan	4	nan	599	nan	89	nan	135	nan	6	nan	19.4175	0.716373	4	nan	673559405747616	nan
Z_Plesovice_26	12249_TRA_Data	06/03/2015 (6) 16:57:18.09	06/03/2015 (6)	16:57:18.090000	24.586	12249_TRA_Data, 16:57:18 (24.5 sec)	0.375	0.013	0.051	0.0019	0.5353			0.05315	0.0006	0.41613	0.016	0.014	no value	NAN	322.5	9.8	321	11	320	280	313	25	152	nan	8	nan	4	nan	590	nan	87	nan	130	nan	7	nan	19.6078	0.730488	8	nan	657086106678390	nan
Z_Plesovice_27	12268_TRA_Data	06/03/2015 (6) 17:23:50.86	06/03/2015 (6)	17:23:50.860000	24.821	12268_TRA_Data, 17:23:51 (24.8 sec)	0.378	0.013	0.0518	0.0019	0.46639			0.05284	0.00057	0.43834	0.016	0.014	no value	NAN	325	9.9	326	11	320	280	306	24	190	nan	10	nan	6	nan	616	nan	97	nan	143	nan	6	nan	19.305	0.708099	-118	nan	694808574569057	nan
Z_Plesovice_28	12269_TRA_Data	06/03/2015 (6) 17:25:13.30	06/03/2015 (6)	17:25:13.300000	24.384	12269_TRA_Data, 17:25:13 (24.3 sec)	0.37	0.013	0.0507	0.0018	0.45032			0.05279	0.00058	0.50779	0.016	0.014	no value	NAN	319.2	9.7	319	11	330	280	299	24	67	nan	4	nan	2	nan	607	nan	89	nan	137	nan	7	nan	19.7239	0.700256	8	nan	671514308335294	nan
Z_Plesovice_29	12288_TRA_Data	06/03/2015 (6) 17:51:42.49	06/03/2015 (6)	17:51:42.490000	25.19	12288_TRA_Data, 17:51:42 (25.1 sec)	0.395	0.014	0.0515	0.0019	0.48851			0.05542	0.00057	0.47486	0.017	0.015	no value	NAN	337	10	324	11	350	300	412	23	157	nan	8	nan	6	nan	740	nan	161	nan	255	nan	5	nan	19.4175	0.716373	-2	nan	843257204938812	nan
Z_Plesovice_30	12289_TRA_Data	06/03/2015 (6) 17:53:05.49	06/03/2015 (6)	17:53:05.490000	25.19	12289_TRA_Data, 17:53:05 (25.1 sec)	0.38	0.013	0.0519	0.0019	0.49565			0.05303	0.00055	0.4744	0.016	0.014	no value	NAN	326.5	9.9	326	12	330	280	314	23	105	nan	6	nan	3	nan	614	nan	93	nan	142	nan	6	nan	19.2678	0.705373	7	nan	698483996332043	nan
s71226120405_1	12110_TRA_Data	06/03/2015 (6) 13:42:05.97	06/03/2015 (6)	13:42:05.970000	13.707	12110_TRA_Data, 13:41:55 (24.8 sec)	4.66	0.16	0.31	0.011	0.78065			0.1076	0.001	0.38666	0.096	0.068	no value	NAN	1755	30	1736	54	1800	1300	1750	17	799	nan	89	nan	43	nan	216	nan	61	nan	568	nan	3	nan	3.22581	0.114464	0	nan	1505623422509680	nan	s71226120405_1
s71226120405_2	12111_TRA_Data	06/03/2015 (6) 13:43:17.15	06/03/2015 (6)	13:43:17.150000	8.7109	12111_TRA_Data, 13:43:17 (25.5 sec)	3.53	0.11	0.263	0.0084	0.65504			0.09867	0.00087	0.53501	0.084	0.034	no value	NAN	1533	31	1508	45	1630	650	1583	17	215	nan	20	nan	8	nan	244	nan	117	nan	822	nan	2	nan	3.80228	0.121442	2	nan	1510389397654030	nan	s71226120405_2
s71226120405_3	12112_TRA_Data	06/03/2015 (6) 13:44:38.64	06/03/2015 (6)	13:44:38.640000	14.891	12112_TRA_Data, 13:44:39 (25.6 sec)	3.26	0.16	0.248	0.01	0.56559			0.0965	0.0012	0.48382	0.072	0.069	no value	NAN	1467	22	1423	50	1400	1200	1544	24	227	nan	22	nan	38	nan	130	nan	110	nan	700	nan	1	nan	4.03226	0.162591	6	nan	816866165437028	nan	s71226120405_3
s71226120405_4	12114_TRA_Data	06/03/2015 (6) 13:47:23.53	06/03/2015 (6)	13:47:23.530000	15.647	12114_TRA_Data, 13:47:24 (24.1 sec)	3.76	0.14	0.282	0.01	0.46014			0.0982	0.0021	0.39336	0.08	0.068	no value	NAN	1572	34	1596	52	1600	1300	1534	43	23	nan	2	nan	11	nan	16	nan	35	nan	251	nan	0	nan	3.5461	0.125748	-16	nan	136973206394502	nan	s71226120405_4
s71226120405_5	12115_TRA_Data	06/03/2015 (6) 13:48:49.73	06/03/2015 (6)	13:48:49.730000	16.041	12115_TRA_Data, 13:48:46 (24.9 sec)	13.34	0.47	0.533	0.019	0.61259			0.1806	0.0017	0.62817	0.15	0.13	no value	NAN	2701	33	2752	82	2800	2300	2651	15	769	nan	139	nan	158	nan	157	nan	188	nan	2570	nan	1	nan	1.87617	0.0668804	-5	nan	2283147255749330	nan	s71226120405_5
s71226120405_6	12116_TRA_Data	06/03/2015 (6) 13:50:10.29	06/03/2015 (6)	13:50:10.290000	21.634	12116_TRA_Data, 13:50:07 (25.2 sec)	3.08	0.11	0.2398	0.0089	0.80103			0.09279	0.00092	0.4341	0.072	0.063	no value	NAN	1423	27	1383	46	1400	1200	1476	19	678	nan	62	nan	129	nan	339	nan	358	nan	2318	nan	1	nan	4.17014	0.154772	4	nan	2127752924862220	nan	s71226120405_6
s71226120405_7	12117_TRA_Data	06/03/2015 (6) 13:51:30.23	06/03/2015 (6)	13:51:30.230000	25.451	12117_TRA_Data, 13:51:30 (25.8 sec)	3.94	0.14	0.302	0.011	0.72945			0.09437	0.00087	0.32224	0.087	0.076	no value	NAN	1617	29	1699	55	1700	1400	1508	17	370	nan	35	nan	66	nan	156	nan	151	nan	1188	nan	1	nan	3.31126	0.120609	-14	nan	1177008041450630	nan	s71226120405_7
s71226120405_8	12118_TRA_Data	06/03/2015 (6) 13:52:52.29	06/03/2015 (6)	13:52:52.290000	25.392	12118_TRA_Data, 13:52:52 (25.3 sec)	3.93	0.14	0.285	0.01	0.70761			0.09971	0.0009	0.44389	0.076	0.066	no value	NAN	1616	29	1617	53	1500	1200	1609	17	672	nan	70	nan	17	nan	388	nan	60	nan	386	nan	7	nan	3.50877	0.123115	-2	nan	2472646158476340	nan	s71226120405_8
s71226120405_9	12119_TRA_Data	06/03/2015 (6) 13:54:14.89	06/03/2015 (6)	13:54:14.890000	11.054	12119_TRA_Data, 13:54:15 (25.2 sec)	0.71	0.023	0.0835	0.0028	0.39975			0.06282	0.00061	0.77312	-180000	150000	no value	NAN	544	14	517	17	280	520	683	21	11068	nan	730	nan	13696	nan	14454	nan	29631	nan	178658	nan	-1268266	nan	11.9761	0.401592	6	nan	3.80967e+16	nan	s71226120405_9
s71226120405_10	12120_TRA_Data	06/03/2015 (6) 13:55:36.31	06/03/2015 (6)	13:55:36.310000	7.6698	12120_TRA_Data, 13:55:37 (25.9 sec)	1.269	0.072	0.1349	0.0066	0.63306			0.0698	0.0011	0.543	0.043	0.04	no value	NAN	831	21	815	34	840	720	897	30	334	nan	23	nan	46	nan	273	nan	161	nan	600	nan	2	nan	7.4129	0.362677	1	nan	884622860793355	nan	s71226120405_10
s71226120405_11	12121_TRA_Data	06/03/2015 (6) 13:56:59.39	06/03/2015 (6)	13:56:59.390000	25.291	12121_TRA_Data, 13:56:59 (25.2 sec)	3.96	0.14	0.286	0.01	0.59583			0.10015	0.00098	0.54735	0.082	0.072	no value	NAN	1622	28	1619	52	1600	1400	1615	18	278	nan	27	nan	52	nan	162	nan	380	nan	2568	nan	1	nan	3.4965	0.122255	-3	nan	1468930854546590	nan	s71226120405_11
s71226120405_12	12122_TRA_Data	06/03/2015 (6) 13:58:20.77	06/03/2015 (6)	13:58:20.770000	23.914	12122_TRA_Data, 13:58:21 (23.9 sec)	1.904	0.069	0.1836	0.0067	0.35824			0.0752	0.0011	0.4603	0.054	0.048	no value	NAN	1077	24	1085	37	1070	920	1039	30	64	nan	5	nan	33	nan	46	nan	120	nan	601	nan	0	nan	5.44662	0.19876	-38	nan	281495281093772	nan	s71226120405_12
s71226120405_13	12123_TRA_Data	06/03/2015 (6) 13:59:43.92	06/03/2015 (6)	13:59:43.920000	25.762	12123_TRA_Data, 13:59:44 (25.7 sec)	1.889	0.068	0.1834	0.0067	0.50058			0.07443	0.00089	0.38368	0.058	0.051	no value	NAN	1073	24	1084	36	1130	960	1032	25	130	nan	11	nan	15	nan	105	nan	57	nan	288	nan	2	nan	5.45256	0.199194	-20	nan	465366156988812	nan	s71226120405_13
s71226120405_14	12130_TRA_Data	06/03/2015 (6) 14:09:45.43	06/03/2015 (6)	14:09:45.430000	20.249	12130_TRA_Data, 14:09:40 (25.7 sec)	4.78	0.16	0.316	0.011	0.61089			0.10896	0.00099	0.57116	0.096	0.081	no value	NAN	1780	29	1770	55	1800	1500	1774	17	571	nan	63	nan	63	nan	224	nan	132	nan	1165	nan	2	nan	3.16456	0.110159	-1	nan	1704119032915990	nan	s71226120405_14
s71226120405_15	12131_TRA_Data	06/03/2015 (6) 14:11:03.40	06/03/2015 (6)	14:11:03.400000	4.8732	12131_TRA_Data, 14:11:04 (25 sec)	0.562	0.022	0.0697	0.0026	0.40619			0.05968	0.00061	0.84309	-900000	120000	no value	NAN	452	13	434	15	220	720	575	21	5788	nan	368	nan	4790	nan	17739	nan	61873	nan	125840	nan	-1120406	nan	14.3472	0.53519	16	nan	4.747e+16	nan	s71226120405_15
s71226120405_16	12132_TRA_Data	06/03/2015 (6) 14:12:24.62	06/03/2015 (6)	14:12:24.620000	9.8153	12132_TRA_Data, 14:12:25 (26 sec)	3.09	0.13	0.2439	0.009	0.59132			0.0932	0.0013	0.5328	0.061	0.056	no value	NAN	1427	27	1407	46	1200	960	1479	24	270	nan	27	nan	26	nan	258	nan	131	nan	687	nan	2	nan	4.10004	0.151293	3	nan	1521128193708640	nan	s71226120405_16
s71226120405_17	12133_TRA_Data	06/03/2015 (6) 14:13:46.58	06/03/2015 (6)	14:13:46.580000	26.098	12133_TRA_Data, 14:13:47 (26 sec)	4.04	0.14	0.291	0.011	0.57572			0.10002	0.00092	0.47972	0.086	0.075	no value	NAN	1639	28	1647	52	1700	1400	1617	17	360	nan	36	nan	78	nan	182	nan	275	nan	2060	nan	1	nan	3.43643	0.129899	-3	nan	1499734750603150	nan	s71226120405_17
s71226120405_18	12134_TRA_Data	06/03/2015 (6) 14:15:09.46	06/03/2015 (6)	14:15:09.460000	7.0226	12134_TRA_Data, 14:15:09 (24.2 sec)	1.94	0.12	0.1832	0.0082	0.59976			0.0778	0.0024	0.49481	0.139	0.079	no value	NAN	1095	25	1083	39	2600	230	1136	41	287	nan	23	nan	3	nan	166	nan	5	nan	59	nan	34	nan	5.45852	0.244322	-1	nan	661115809583947	nan	s71226120405_18
s71226120405_19	12135_TRA_Data	06/03/2015 (6) 14:16:32.56	06/03/2015 (6)	14:16:32.560000	23.175	12135_TRA_Data, 14:16:32 (24.6 sec)	4.13	0.15	0.305	0.011	0.61622			0.0981	0.001	0.45116	0.083	0.073	no value	NAN	1655	29	1710	55	1600	1400	1573	20	79	nan	7	nan	18	nan	138	nan	136	nan	968	nan	1	nan	3.27869	0.118248	-13	nan	1046682161170210	nan	s71226120405_19
s71226120405_20	12136_TRA_Data	06/03/2015 (6) 14:17:54.56	06/03/2015 (6)	14:17:54.560000	11.709	12136_TRA_Data, 14:17:55 (25.1 sec)	3.33	0.11	0.2425	0.0083	0.60854			0.09999	0.00094	0.52252	0.062	0.048	no value	NAN	1484	27	1398	43	1210	910	1621	18	239	nan	26	nan	35	nan	187	nan	155	nan	842	nan	1	nan	4.12371	0.141142	12	nan	1152706594204500	nan	s71226120405_20
s71226120405_21	12137_TRA_Data	06/03/2015 (6) 14:19:15.55	06/03/2015 (6)	14:19:15.550000	9.1268	12137_TRA_Data, 14:19:16 (26.1 sec)	2.374	0.078	0.2019	0.0067	0.63049			0.0865	0.00088	0.48143	0.074	0.062	no value	NAN	1232	25	1184	36	1400	1200	1337	20	179	nan	15	nan	25	nan	212	nan	133	nan	832	nan	2	nan	4.95295	0.164362	8	nan	1050885152602230	nan	s71226120405_21
s71226120405_22	12138_TRA_Data	06/03/2015 (6) 14:20:38.68	06/03/2015 (6)	14:20:38.680000	25.808	12138_TRA_Data, 14:20:39 (25.9 sec)	2.222	0.091	0.1993	0.0083	0.73898			0.0809	0.0011	0.11171	0.064	0.059	no value	NAN	1171	25	1164	42	1110	360	1208	26	11	nan	1	nan	-2	nan	150	nan	117	nan	478	nan	2	nan	5.01756	0.20896	-7	nan	699166718627669	nan	s71226120405_22
s71226120405_23	12139_TRA_Data	06/03/2015 (6) 14:22:00.70	06/03/2015 (6)	14:22:00.700000	23.981	12139_TRA_Data, 14:22:01 (23.9 sec)	3.29	0.12	0.2553	0.0093	0.55257			0.09305	0.00094	0.55758	0.075	0.065	no value	NAN	1477	27	1463	48	1500	1200	1478	19	206	nan	21	nan	29	nan	156	nan	116	nan	775	nan	1	nan	3.91696	0.142686	-2	nan	993255960594041	nan	s71226120405_23
s71226120405_24	12140_TRA_Data	06/03/2015 (6) 14:23:38.12	06/03/2015 (6)	14:23:38.120000	8.9928	12140_TRA_Data, 14:23:33 (14.4 sec)	3.07	0.11	0.2359	0.0087	0.81258			0.09282	0.0009	0.44106	0.075	0.065	no value	NAN	1422	28	1363	45	1500	1200	1475	19	526	nan	50	nan	46	nan	301	nan	146	nan	1040	nan	2	nan	4.23908	0.156338	6	nan	1688296286308890	nan	s71226120405_24
s71226120405_25	12141_TRA_Data	06/03/2015 (6) 14:26:08.32	06/03/2015 (6)	14:26:08.320000	25.358	12141_TRA_Data, 14:26:08 (25.3 sec)	3.84	0.13	0.278	0.01	0.68765			0.09973	0.00085	0.51588	0.065	0.057	no value	NAN	1598	28	1580	51	1300	1100	1611	16	702	nan	73	nan	303	nan	455	nan	1414	nan	8081	nan	0	nan	3.59712	0.129393	0	nan	4519796911708790	nan	s71226120405_25
s71226120405_26	12142_TRA_Data	06/03/2015 (6) 14:27:46.13	06/03/2015 (6)	14:27:46.130000	15.483	12142_TRA_Data, 14:27:46 (24.5 sec)	2.738	0.092	0.2287	0.008	0.60938			0.08736	0.00083	0.45431	0.07	0.051	no value	NAN	1336	26	1325	42	1370	970	1353	19	359	nan	32	nan	53	nan	205	nan	174	nan	1064	nan	1	nan	4.37254	0.152953	-2	nan	1198364963866430	nan	s71226120405_26
s71226120405_27	12143_TRA_Data	06/03/2015 (6) 14:29:08.68	06/03/2015 (6)	14:29:08.680000	25.997	12143_TRA_Data, 14:29:09 (25.9 sec)	3.92	0.14	0.283	0.01	0.63042			0.10022	0.00097	0.45731	0.085	0.074	no value	NAN	1616	29	1605	51	1600	1400	1619	18	188	nan	19	nan	11	nan	137	nan	66	nan	495	nan	2	nan	3.53357	0.124861	-1	nan	929075299006668	nan	s71226120405_27
s71226120405_28	12150_TRA_Data	06/03/2015 (6) 14:39:06.49	06/03/2015 (6)	14:39:06.490000	9.8864	12150_TRA_Data, 14:39:06 (25.1 sec)	4.07	0.18	0.283	0.01	0.59439			0.1059	0.0018	0.4883	0.072	0.068	no value	NAN	1645	30	1601	52	1400	1300	1715	28	774	nan	81	nan	131	nan	328	nan	377	nan	2412	nan	1	nan	3.53357	0.124861	4	nan	2448924547341550	nan	s71226120405_28
s71226120405_29	12151_TRA_Data	06/03/2015 (6) 14:40:30.60	06/03/2015 (6)	14:40:30.600000	24.082	12151_TRA_Data, 14:40:31 (24 sec)	4.07	0.14	0.293	0.011	0.57395			0.1006	0.0011	0.53244	0.084	0.074	no value	NAN	1645	29	1655	53	1600	1400	1619	20	199	nan	21	nan	39	nan	88	nan	96	nan	735	nan	1	nan	3.41297	0.128132	-5	nan	675230054464567	nan	s71226120405_29
s71226120405_30	12152_TRA_Data	06/03/2015 (6) 14:41:52.99	06/03/2015 (6)	14:41:52.990000	18.313	12152_TRA_Data, 14:41:53 (25.4 sec)	9.56	0.37	0.422	0.016	0.65061			0.1648	0.0018	0.50809	0.12	0.11	no value	NAN	2387	33	2265	71	2200	1900	2495	18	183	nan	29	nan	35	nan	87	nan	102	nan	1036	nan	1	nan	2.36967	0.0898452	9	nan	1071130133378740	nan	s71226120405_30
s71226120405_31	12153_TRA_Data	06/03/2015 (6) 14:43:16.36	06/03/2015 (6)	14:43:16.360000	24.317	12153_TRA_Data, 14:43:16 (24.3 sec)	4.03	0.15	0.285	0.011	0.78043			0.1026	0.001	0.41822	0.082	0.072	no value	NAN	1636	29	1613	54	1600	1300	1662	19	319	nan	38	nan	39	nan	311	nan	184	nan	1325	nan	2	nan	3.50877	0.135426	1	nan	2124246924443730	nan	s71226120405_31
s71226120405_32	12154_TRA_Data	06/03/2015 (6) 14:44:38.83	06/03/2015 (6)	14:44:38.830000	12.007	12154_TRA_Data, 14:44:39 (24.8 sec)	2.513	0.087	0.2132	0.0075	0.5551			0.0867	0.001	0.52462	0.064	0.058	no value	NAN	1271	26	1244	40	1300	1100	1330	22	99	nan	8	nan	15	nan	91	nan	64	nan	364	nan	1	nan	4.69043	0.165001	2	nan	479325478791882	nan	s71226120405_32
s71226120405_33	12155_TRA_Data	06/03/2015 (6) 14:46:01.59	06/03/2015 (6)	14:46:01.590000	25.09	12155_TRA_Data, 14:46:02 (25 sec)	3.41	0.12	0.2657	0.0097	0.52197			0.09277	0.00097	0.50911	0.079	0.069	no value	NAN	1502	27	1517	49	1500	1300	1472	20	101	nan	9	nan	7	nan	85	nan	37	nan	269	nan	2	nan	3.76364	0.137401	-6	nan	537407191768483	nan	s71226120405_33
s71226120405_34	12156_TRA_Data	06/03/2015 (6) 14:47:26.04	06/03/2015 (6)	14:47:26.040000	4.8766	12156_TRA_Data, 14:47:26 (22.6 sec)	0.917	0.036	0.1064	0.0041	0.57782			0.0633	0.00064	0.3819	0.043	0.038	no value	NAN	659	19	651	24	860	740	705	21	329	nan	21	nan	-1	nan	799	nan	22	nan	98	nan	67	nan	9.3985	0.36216	-1	nan	1813638466648290	nan	s71226120405_34
s71226120405_35	12157_TRA_Data	06/03/2015 (6) 14:48:47.81	06/03/2015 (6)	14:48:47.810000	24.116	12157_TRA_Data, 14:48:47 (25.6 sec)	4.34	0.15	0.297	0.011	0.56951			0.1061	0.0012	0.46797	0.087	0.076	no value	NAN	1698	30	1674	54	1700	1400	1718	21	50	nan	5	nan	6	nan	65	nan	48	nan	362	nan	1	nan	3.367	0.124704	1	nan	469265729099070	nan	s71226120405_35
s71226120405_36	12158_TRA_Data	06/03/2015 (6) 14:50:10.52	06/03/2015 (6)	14:50:10.520000	25.157	12158_TRA_Data, 14:50:11 (25.1 sec)	3.3	0.12	0.2593	0.0095	0.53639			0.0923	0.001	0.47559	0.073	0.064	no value	NAN	1476	28	1483	48	1400	1200	1460	22	90	nan	8	nan	49	nan	76	nan	240	nan	1557	nan	0	nan	3.85654	0.141292	-6	nan	699708736448378	nan	s71226120405_36
s71226120405_37	12159_TRA_Data	06/03/2015 (6) 14:51:33.16	06/03/2015 (6)	14:51:33.160000	18.472	12159_TRA_Data, 14:51:33 (24.5 sec)	3.33	0.12	0.2586	0.0097	0.38271			0.094	0.0014	0.5153	0.074	0.067	no value	NAN	1480	30	1483	49	1400	1300	1470	30	50	nan	4	nan	16	nan	24	nan	44	nan	297	nan	1	nan	3.86698	0.145049	-12	nan	185499295973676	nan	s71226120405_37
s71226120405_38	12160_TRA_Data	06/03/2015 (6) 14:53:03.75	06/03/2015 (6)	14:53:03.750000	14.983	12160_TRA_Data, 14:52:55 (24.6 sec)	5.54	0.2	0.331	0.012	0.74433			0.1197	0.0012	0.42258	0.079	0.066	no value	NAN	1900	31	1842	58	1500	1200	1945	18	218	nan	27	nan	25	nan	117	nan	107	nan	709	nan	1	nan	3.02115	0.109528	4	nan	959076085973800	nan	s71226120405_38
s71226120405_39	12161_TRA_Data	06/03/2015 (6) 14:54:18.63	06/03/2015 (6)	14:54:18.630000	24.048	12161_TRA_Data, 14:54:19 (24 sec)	3.27	0.13	0.2561	0.0099	0.78503			0.0914	0.0012	0.031174	0.081	0.071	no value	NAN	1451	32	1465	51	1600	1300	1436	25	156	nan	17	nan	24	nan	113	nan	82	nan	593	nan	1	nan	3.90473	0.150944	-10	nan	643759832713929	nan	s71226120405_39
s71226120405_40	12162_TRA_Data	06/03/2015 (6) 14:55:41.85	06/03/2015 (6)	14:55:41.850000	6.5571	12162_TRA_Data, 14:55:42 (25.8 sec)	4.26	0.2	0.292	0.014	0.64593			0.1084	0.0012	0.53821	0.063	0.051	no value	NAN	1679	30	1644	60	1230	940	1752	20	400	nan	43	nan	87	nan	311	nan	419	nan	2279	nan	1	nan	3.42466	0.164196	3	nan	2429167395224340	nan	s71226120405_40
s71226120405_41	12163_TRA_Data	06/03/2015 (6) 14:57:05.50	06/03/2015 (6)	14:57:05.500000	8.5005	12163_TRA_Data, 14:57:05 (24.1 sec)	1.375	0.045	0.1437	0.0049	0.54944			0.07055	0.00068	0.60143	0.048	0.042	no value	NAN	876	20	865	28	950	810	926	20	632	nan	47	nan	62	nan	554	nan	228	nan	975	nan	2	nan	6.95894	0.237292	-2	nan	1852390694629750	nan	s71226120405_41
s71226120405_42	12170_TRA_Data	06/03/2015 (6) 15:07:03.79	06/03/2015 (6)	15:07:03.790000	22.192	12170_TRA_Data, 15:07:04 (24 sec)	1.609	0.062	0.1476	0.0056	0.55174			0.07847	0.00098	0.22481	0.066	0.066	no value	NAN	969	23	887	31	1200	1100	1139	25	290	nan	24	nan	4	nan	181	nan	13	nan	78	nan	14	nan	6.77507	0.257049	13	nan	576382968052415	nan	s71226120405_42
s71226120405_43	12171_TRA_Data	06/03/2015 (6) 15:08:26.88	06/03/2015 (6)	15:08:26.880000	25.795	12171_TRA_Data, 15:08:27 (25.7 sec)	1.938	0.068	0.1854	0.0067	0.49883			0.07572	0.00082	0.49916	0.055	0.048	no value	NAN	1092	24	1095	37	1090	930	1075	22	124	nan	10	nan	33	nan	127	nan	165	nan	859	nan	1	nan	5.39374	0.194919	-13	nan	647303320302919	nan	s71226120405_43
s71226120405_44	12172_TRA_Data	06/03/2015 (6) 15:09:50.12	06/03/2015 (6)	15:09:50.120000	25.56	12172_TRA_Data, 15:09:50 (25.5 sec)	3.64	0.13	0.2734	0.0099	0.55004			0.0961	0.00095	0.60495	0.079	0.069	no value	NAN	1554	28	1556	50	1500	1300	1541	19	278	nan	27	nan	54	nan	137	nan	147	nan	1078	nan	1	nan	3.65764	0.132446	-3	nan	988976092874260	nan	s71226120405_44
s71226120405_45	12173_TRA_Data	06/03/2015 (6) 15:11:13.13	06/03/2015 (6)	15:11:13.130000	10.166	12173_TRA_Data, 15:11:13 (21.1 sec)	3.88	0.24	0.281	0.019	0.64252			0.1012	0.0017	0.49609	0.077	0.086	no value	NAN	1604	33	1593	71	1500	1500	1639	33	715	nan	72	nan	195	nan	293	nan	428	nan	2944	nan	1	nan	3.55872	0.240625	1	nan	2297691044733170	nan	s71226120405_45
s71226120405_46	12174_TRA_Data	06/03/2015 (6) 15:12:36.04	06/03/2015 (6)	15:12:36.040000	12.686	12174_TRA_Data, 15:12:36 (23.6 sec)	3.3	0.14	0.2611	0.0097	0.55784			0.0929	0.0019	0.54078	0.07	0.052	no value	NAN	1477	33	1493	51	1370	970	1457	40	64	nan	7	nan	18	nan	60	nan	86	nan	542	nan	1	nan	3.82995	0.142285	-11	nan	431318283075933	nan	s71226120405_46
s71226120405_47	12175_TRA_Data	06/03/2015 (6) 15:13:59.05	06/03/2015 (6)	15:13:59.050000	24.305	12175_TRA_Data, 15:13:59 (25.6 sec)	4.73	0.17	0.313	0.011	0.57871			0.1094	0.001	0.49415	0.086	0.077	no value	NAN	1769	29	1751	55	1700	1400	1783	17	455	nan	50	nan	60	nan	194	nan	156	nan	1230	nan	1	nan	3.19489	0.11228	0	nan	1489739567740500	nan	s71226120405_47
s71226120405_48	12176_TRA_Data	06/03/2015 (6) 15:15:27.51	06/03/2015 (6)	15:15:27.510000	19.174	12176_TRA_Data, 15:15:22 (24.6 sec)	3.77	0.13	0.2725	0.0098	0.72362			0.09923	0.00083	0.52647	0.06	0.055	no value	NAN	1584	28	1553	50	1200	1000	1603	16	834	nan	85	nan	273	nan	615	nan	1459	nan	8084	nan	0	nan	3.66973	0.131975	2	nan	5468884732241920	nan	s71226120405_48
s71226120405_49	12177_TRA_Data	06/03/2015 (6) 15:16:56.14	06/03/2015 (6)	15:16:56.140000	11.977	12177_TRA_Data, 15:16:45 (23.8 sec)	4.08	0.14	0.2852	0.0099	0.86346			0.1029	0.001	0.31633	0.082	0.061	no value	NAN	1645	29	1615	50	1600	1200	1668	18	297	nan	32	nan	59	nan	167	nan	209	nan	1601	nan	1	nan	3.50631	0.121713	2	nan	1254464991889200	nan	s71226120405_49
s71226120405_50	12178_TRA_Data	06/03/2015 (6) 15:18:08.02	06/03/2015 (6)	15:18:08.020000	25.661	12178_TRA_Data, 15:18:08 (25.6 sec)	2.231	0.079	0.2022	0.0074	0.6751			0.07976	0.00075	0.48463	0.062	0.055	no value	NAN	1187	25	1186	40	1200	1000	1179	18	268	nan	21	nan	44	nan	311	nan	271	nan	1533	nan	1	nan	4.9456	0.180996	-5	nan	1605504579950770	nan	s71226120405_50
s71226120405_51	12179_TRA_Data	06/03/2015 (6) 15:19:30.22	06/03/2015 (6)	15:19:30.220000	19.602	12179_TRA_Data, 15:19:30 (25.4 sec)	1.94	0.073	0.1888	0.0071	0.66226			0.0748	0.00097	0.38357	0.054	0.05	no value	NAN	1089	25	1112	38	1070	940	1044	27	110	nan	9	nan	18	nan	109	nan	76	nan	364	nan	2	nan	5.29661	0.199184	-18	nan	492865465930887	nan	s71226120405_51
s71226120405_52	12180_TRA_Data	06/03/2015 (6) 15:20:53.66	06/03/2015 (6)	15:20:53.660000	25.022	12180_TRA_Data, 15:20:54 (25 sec)	4.02	0.14	0.289	0.011	0.50291			0.1008	0.0011	0.54882	0.088	0.077	no value	NAN	1634	29	1636	52	1700	1400	1620	21	86	nan	9	nan	9	nan	59	nan	36	nan	282	nan	2	nan	3.46021	0.131703	-3	nan	410503139027450	nan	s71226120405_52
s71226120405_53	12181_TRA_Data	06/03/2015 (6) 15:22:15.82	06/03/2015 (6)	15:22:15.820000	25.862	12181_TRA_Data, 15:22:16 (25.8 sec)	1.609	0.059	0.1636	0.006	0.36334			0.0716	0.0011	0.4233	0.048	0.042	no value	NAN	969	23	976	33	940	810	926	32	39	nan	3	nan	5	nan	42	nan	35	nan	151	nan	1	nan	6.11247	0.224174	-21	nan	173581742983741	nan	s71226120405_53
s71226120405_54	12182_TRA_Data	06/03/2015 (6) 15:23:38.76	06/03/2015 (6)	15:23:38.760000	24.922	12182_TRA_Data, 15:23:39 (24.9 sec)	3.64	0.13	0.2692	0.0098	0.56442			0.09778	0.00095	0.49774	0.076	0.067	no value	NAN	1554	28	1536	50	1500	1200	1571	19	150	nan	15	nan	62	nan	147	nan	337	nan	2361	nan	0	nan	3.71471	0.135231	0	nan	1266633210519850	nan	s71226120405_54
s71226120405_55	12183_TRA_Data	06/03/2015 (6) 15:25:01.93	06/03/2015 (6)	15:25:01.930000	24.754	12183_TRA_Data, 15:25:02 (24.7 sec)	5.98	0.21	0.359	0.013	0.57715			0.1206	0.0011	0.46199	0.103	0.09	no value	NAN	1971	30	1976	61	2000	1600	1955	16	342	nan	41	nan	52	nan	167	nan	145	nan	1342	nan	1	nan	2.78552	0.100868	-2	nan	1457328554671900	nan	s71226120405_55
s71226120405_56	12190_TRA_Data	06/03/2015 (6) 15:35:02.03	06/03/2015 (6)	15:35:02.030000	24.653	12190_TRA_Data, 15:35:02 (24.6 sec)	1.894	0.075	0.182	0.0069	0.33887			0.0759	0.0016	0.3637	0.056	0.049	no value	NAN	1067	27	1075	37	1100	940	1016	45	2	nan	0	nan	4	nan	18	nan	22	nan	114	nan	1	nan	5.49451	0.208308	-5	nan	88711251795586	nan	s71226120405_56
s71226120405_57	12191_TRA_Data	06/03/2015 (6) 15:36:25.80	06/03/2015 (6)	15:36:25.800000	14.244	12191_TRA_Data, 15:36:26 (23.8 sec)	2.152	0.075	0.1942	0.0069	0.52393			0.0816	0.0011	0.42373	0.055	0.048	no value	NAN	1164	26	1142	37	1090	910	1207	26	105	nan	9	nan	20	nan	86	nan	91	nan	451	nan	1	nan	5.14933	0.182958	-1	nan	440067174968887	nan	s71226120405_57
s71226120405_58	12192_TRA_Data	06/03/2015 (6) 15:37:56.57	06/03/2015 (6)	15:37:56.570000	15.109	12192_TRA_Data, 15:37:48 (23.6 sec)	4.62	0.16	0.302	0.011	0.62338			0.1092	0.0011	0.5014	0.089	0.075	no value	NAN	1749	29	1701	55	1700	1400	1779	18	179	nan	22	nan	29	nan	114	nan	110	nan	896	nan	1	nan	3.31126	0.120609	3	nan	892852115664040	nan	s71226120405_58
s71226120405_59	12193_TRA_Data	06/03/2015 (6) 15:39:11.66	06/03/2015 (6)	15:39:11.660000	25.022	12193_TRA_Data, 15:39:12 (25 sec)	3.73	0.13	0.277	0.01	0.58353			0.09766	0.00099	0.52293	0.079	0.07	no value	NAN	1576	28	1574	51	1500	1300	1570	19	71	nan	8	nan	1	nan	121	nan	140	nan	970	nan	1	nan	3.61011	0.130329	-3	nan	890457685125274	nan	s71226120405_59
s71226120405_60	12194_TRA_Data	06/03/2015 (6) 15:40:39.73	06/03/2015 (6)	15:40:39.730000	7.6104	12194_TRA_Data, 15:40:35 (24 sec)	3.63	0.22	0.267	0.01	0.60436			0.0989	0.0029	0.59261	0.079	0.086	no value	NAN	1554	34	1524	51	1500	1600	1592	38	767	nan	83	nan	83	nan	678	nan	358	nan	2585	nan	2	nan	3.74532	0.140274	2	nan	4382047838694590	nan	s71226120405_60
s71226120405_61	12195_TRA_Data	06/03/2015 (6) 15:41:57.04	06/03/2015 (6)	15:41:57.040000	14.276	12195_TRA_Data, 15:41:57 (19.3 sec)	4.2	0.24	0.29	0.017	0.703			0.1054	0.0014	0.59733	0.088	0.094	no value	NAN	1670	28	1642	67	1700	1500	1714	24	1002	nan	110	nan	59	nan	677	nan	207	nan	1589	nan	3	nan	3.44828	0.20214	2	nan	4408487799402000	nan	s71226120405_61
s71226120405_62	12196_TRA_Data	06/03/2015 (6) 15:43:20.67	06/03/2015 (6)	15:43:20.670000	24.014	12196_TRA_Data, 15:43:21 (24 sec)	2.86	0.1	0.2362	0.0087	0.48673			0.0879	0.0011	0.46314	0.072	0.063	no value	NAN	1366	27	1365	45	1400	1200	1355	25	70	nan	6	nan	9	nan	50	nan	36	nan	231	nan	1	nan	4.2337	0.155941	-6	nan	292881853034300	nan	s71226120405_62
s71226120405_63	12197_TRA_Data	06/03/2015 (6) 15:44:42.55	06/03/2015 (6)	15:44:42.550000	26.131	12197_TRA_Data, 15:44:43 (26.1 sec)	2.347	0.084	0.2119	0.0078	0.57942			0.08051	0.00092	0.44609	0.061	0.053	no value	NAN	1224	26	1237	42	1200	1000	1192	23	-13	nan	-2	nan	2	nan	128	nan	146	nan	751	nan	1	nan	4.71921	0.173713	-11	nan	716134804451586	nan	s71226120405_63
s71226120405_64	12198_TRA_Data	06/03/2015 (6) 15:46:05.93	06/03/2015 (6)	15:46:05.930000	18.833	12198_TRA_Data, 15:46:06 (23.7 sec)	3.99	0.14	0.284	0.01	0.65996			0.10167	0.00091	0.58283	0.083	0.072	no value	NAN	1630	28	1612	51	1600	1400	1646	17	405	nan	40	nan	111	nan	296	nan	422	nan	3183	nan	1	nan	3.52113	0.123983	1	nan	2331801201411450	nan	s71226120405_64
s71226120405_65	12199_TRA_Data	06/03/2015 (6) 15:47:28.02	06/03/2015 (6)	15:47:28.020000	25.661	12199_TRA_Data, 15:47:28 (25.6 sec)	3.55	0.13	0.2707	0.0099	0.7348			0.09443	0.00089	0.31158	0.11	0.1	no value	NAN	1534	27	1542	50	2200	1800	1508	18	323	nan	32	nan	1	nan	227	nan	37	nan	273	nan	38	nan	3.69413	0.135101	-4	nan	1348829144020420	nan	s71226120405_65
s71226120405_66	12200_TRA_Data	06/03/2015 (6) 15:48:51.25	06/03/2015 (6)	15:48:51.250000	18.624	12200_TRA_Data, 15:48:51 (25.4 sec)	10.47	0.36	0.463	0.016	0.61592			0.164	0.0016	0.44054	0.13	0.11	no value	NAN	2475	33	2449	73	2400	2000	2485	16	120	nan	20	nan	68	nan	86	nan	232	nan	2687	nan	0	nan	2.15983	0.0746377	1	nan	1408362736421620	nan	s71226120405_66
s71226120405_67	12202_TRA_Data	06/03/2015 (6) 15:51:42.95	06/03/2015 (6)	15:51:42.950000	18.729	12202_TRA_Data, 15:51:37 (24.5 sec)	2.98	0.1	0.2385	0.0086	0.58076			0.08964	0.00087	0.46446	0.07	0.06	no value	NAN	1398	27	1377	44	1400	1100	1407	19	330	nan	30	nan	51	nan	154	nan	128	nan	836	nan	1	nan	4.19287	0.15119	0	nan	937307148784688	nan	s71226120405_67
s71226120405_68	12203_TRA_Data	06/03/2015 (6) 15:53:00.59	06/03/2015 (6)	15:53:00.590000	24.09	12203_TRA_Data, 15:53:01 (23.7 sec)	4.11	0.15	0.295	0.011	0.82563			0.10061	0.00096	0.467	0.092	0.081	no value	NAN	1649	29	1664	55	1800	1500	1629	18	220	nan	21	nan	25	nan	231	nan	195	nan	1482	nan	1	nan	3.38983	0.1264	-4	nan	1630366083750830	nan	s71226120405_68
s71226120405_69	12210_TRA_Data	06/03/2015 (6) 16:03:00.23	06/03/2015 (6)	16:03:00.230000	24.451	12210_TRA_Data, 16:03:00 (24.4 sec)	2.76	0.096	0.2276	0.0083	0.6047			0.08761	0.00083	0.4854	0.068	0.06	no value	NAN	1342	26	1321	43	1300	1100	1365	18	401	nan	36	nan	78	nan	345	nan	370	nan	2323	nan	1	nan	4.39367	0.160226	1	nan	2089456509216790	nan	s71226120405_69
s71226120405_70	12211_TRA_Data	06/03/2015 (6) 16:04:22.40	06/03/2015 (6)	16:04:22.400000	24.283	12211_TRA_Data, 16:04:22 (24.2 sec)	3.94	0.14	0.287	0.011	0.083436			0.0993	0.0012	0.080476	0.083	0.073	no value	NAN	1616	29	1628	53	1600	1400	1588	22	56	nan	6	nan	12	nan	53	nan	64	nan	484	nan	1	nan	3.48432	0.133545	-5	nan	409080075602421	nan	s71226120405_70
s71226120405_71	12212_TRA_Data	06/03/2015 (6) 16:05:46.32	06/03/2015 (6)	16:05:46.320000	8.5429	12212_TRA_Data, 16:05:46 (25.3 sec)	3.34	0.1	0.2656	0.0081	0.66998			0.0929	0.001	0.5336	0.076	0.076	no value	NAN	1488	29	1514	43	1500	1400	1470	24	213	nan	20	nan	29	nan	157	nan	112	nan	730	nan	1	nan	3.76506	0.114823	-8	nan	1012188547922200	nan	s71226120405_71
s71226120405_72	12213_TRA_Data	06/03/2015 (6) 16:07:08.99	06/03/2015 (6)	16:07:08.990000	25.694	12213_TRA_Data, 16:07:09 (25.6 sec)	4.15	0.15	0.296	0.011	0.56945			0.10171	0.00099	0.55586	0.086	0.075	no value	NAN	1661	29	1669	54	1700	1400	1646	18	140	nan	15	nan	48	nan	126	nan	234	nan	1833	nan	1	nan	3.37838	0.125548	-4	nan	1102259639617200	nan	s71226120405_72
s71226120405_73	12214_TRA_Data	06/03/2015 (6) 16:08:31.02	06/03/2015 (6)	16:08:31.020000	25.661	12214_TRA_Data, 16:08:31 (25.6 sec)	4.01	0.14	0.288	0.01	0.60167			0.10056	0.00098	0.48577	0.083	0.073	no value	NAN	1631	29	1633	52	1600	1400	1621	18	161	nan	17	nan	54	nan	116	nan	215	nan	1639	nan	1	nan	3.47222	0.120563	-2	nan	998574523218939	nan	s71226120405_73
s71226120405_74	12215_TRA_Data	06/03/2015 (6) 16:09:53.42	06/03/2015 (6)	16:09:53.420000	25.258	12215_TRA_Data, 16:09:53 (25.2 sec)	4.03	0.14	0.289	0.011	0.51117			0.1012	0.0012	0.53488	0.084	0.073	no value	NAN	1637	29	1634	53	1600	1400	1628	21	40	nan	4	nan	9	nan	59	nan	72	nan	552	nan	1	nan	3.46021	0.131703	-3	nan	455221857526338	nan	s71226120405_74
s71226120405_75	12216_TRA_Data	06/03/2015 (6) 16:11:16.63	06/03/2015 (6)	16:11:16.630000	24.048	12216_TRA_Data, 16:11:17 (24 sec)	4.04	0.14	0.284	0.01	0.44913			0.1033	0.0013	0.54335	0.082	0.072	no value	NAN	1638	29	1611	52	1600	1300	1663	23	48	nan	5	nan	17	nan	55	nan	108	nan	807	nan	1	nan	3.52113	0.123983	-2	nan	470760848158875	nan	s71226120405_75
s71226120405_76	12218_TRA_Data	06/03/2015 (6) 16:14:02.25	06/03/2015 (6)	16:14:02.250000	25.426	12218_TRA_Data, 16:14:02 (25.4 sec)	1.782	0.063	0.173	0.0063	0.50171			0.07469	0.00078	0.45999	0.048	0.042	no value	NAN	1037	23	1028	34	960	820	1044	21	64	nan	5	nan	9	nan	144	nan	146	nan	669	nan	1	nan	5.78035	0.210498	-5	nan	654105180923145	nan	s71226120405_76
s71226120405_77	12219_TRA_Data	06/03/2015 (6) 16:15:25.19	06/03/2015 (6)	16:15:25.190000	25.493	12219_TRA_Data, 16:15:25 (25.4 sec)	2.89	0.11	0.2356	0.0087	0.40785			0.0893	0.0013	0.48667	0.071	0.062	no value	NAN	1372	27	1361	45	1400	1200	1377	29	11	nan	1	nan	0	nan	29	nan	14	nan	90	nan	2	nan	4.24448	0.156736	-9	nan	160529040638781	nan	s71226120405_77
s71226120405_78	12220_TRA_Data	06/03/2015 (6) 16:16:47.46	06/03/2015 (6)	16:16:47.460000	25.224	12220_TRA_Data, 16:16:47 (25.2 sec)	2.056	0.072	0.1879	0.0068	0.5108			0.0793	0.00082	0.54138	0.056	0.049	no value	NAN	1133	24	1110	37	1110	940	1169	21	47	nan	3	nan	7	nan	164	nan	95	nan	477	nan	2	nan	5.32198	0.1926	0	nan	744475654146638	nan	s71226120405_78
s71226120405_79	12221_TRA_Data	06/03/2015 (6) 16:18:12.43	06/03/2015 (6)	16:18:12.430000	23.25	12221_TRA_Data, 16:18:11 (24.3 sec)	3.45	0.12	0.2472	0.009	0.7051			0.10091	0.0009	0.51658	0.067	0.059	no value	NAN	1513	28	1422	46	1300	1100	1632	17	791	nan	79	nan	147	nan	609	nan	677	nan	4123	nan	1	nan	4.04531	0.147281	12	nan	3998613948402260	nan	s71226120405_79
s71226120405_80	12222_TRA_Data	06/03/2015 (6) 16:19:32.56	06/03/2015 (6)	16:19:32.560000	24.115	12222_TRA_Data, 16:19:33 (24.1 sec)	2.03	0.073	0.1873	0.0069	0.45595			0.0786	0.00097	0.50534	0.056	0.049	no value	NAN	1123	24	1105	37	1100	940	1144	25	64	nan	5	nan	10	nan	73	nan	57	nan	291	nan	1	nan	5.33903	0.196686	-7	nan	341444922019080	nan	s71226120405_80
s71226120405_81	12223_TRA_Data	06/03/2015 (6) 16:20:55.60	06/03/2015 (6)	16:20:55.600000	24.082	12223_TRA_Data, 16:20:56 (24 sec)	2.404	0.089	0.2145	0.008	0.38446			0.0811	0.0013	0.4265	0.065	0.057	no value	NAN	1234	26	1251	42	1300	1100	1185	32	27	nan	2	nan	4	nan	31	nan	37	nan	222	nan	1	nan	4.662	0.173874	-22	nan	181816958727590	nan	s71226120405_81
s71226120405_82	12230_TRA_Data	06/03/2015 (6) 16:30:53.59	06/03/2015 (6)	16:30:53.590000	20.177	12230_TRA_Data, 16:30:54 (25 sec)	2.146	0.074	0.1946	0.007	0.60297			0.07973	0.00082	0.44034	0.068	0.059	no value	NAN	1160	24	1146	38	1300	1100	1181	21	128	nan	11	nan	13	nan	253	nan	130	nan	789	nan	2	nan	5.13875	0.184847	-1	nan	1189799347582840	nan	s71226120405_82
s71226120405_83	12231_TRA_Data	06/03/2015 (6) 16:32:17.09	06/03/2015 (6)	16:32:17.090000	14.95	12231_TRA_Data, 16:32:17 (24.5 sec)	3.84	0.13	0.2799	0.0097	0.53112			0.1004	0.0012	0.55471	0.08	0.068	no value	NAN	1597	30	1590	50	1600	1300	1607	24	83	nan	8	nan	20	nan	64	nan	82	nan	591	nan	1	nan	3.57271	0.123813	-1	nan	486121277045160	nan	s71226120405_83
s71226120405_84	12232_TRA_Data	06/03/2015 (6) 16:33:45.41	06/03/2015 (6)	16:33:45.410000	12.036	12232_TRA_Data, 16:33:39 (24.3 sec)	4.57	0.15	0.287	0.011	0.42144			0.1175	0.0018	0.86249	0.09	0.081	no value	NAN	1741	29	1623	53	1700	1500	1888	28	765	nan	81	nan	17	nan	679	nan	94	nan	770	nan	8	nan	3.48432	0.133545	11	nan	4217876659943550	nan	s71226120405_84
s71226120405_85	12233_TRA_Data	06/03/2015 (6) 16:35:02.43	06/03/2015 (6)	16:35:02.430000	24.25	12233_TRA_Data, 16:35:02 (24.2 sec)	4.09	0.14	0.295	0.011	0.58158			0.1004	0.001	0.52755	0.087	0.077	no value	NAN	1649	28	1663	53	1700	1400	1618	19	85	nan	9	nan	18	nan	110	nan	136	nan	1082	nan	1	nan	3.38983	0.1264	-5	nan	866527455949619	nan	s71226120405_85
s71226120405_86	12234_TRA_Data	06/03/2015 (6) 16:36:24.40	06/03/2015 (6)	16:36:24.400000	24.283	12234_TRA_Data, 16:36:24 (24.2 sec)	2.581	0.091	0.2212	0.008	0.49715			0.08408	0.00091	0.46774	0.067	0.059	no value	NAN	1292	26	1288	42	1300	1100	1281	21	122	nan	10	nan	13	nan	119	nan	63	nan	385	nan	2	nan	4.5208	0.163501	-5	nan	628504906479115	nan	s71226120405_86
s71226120405_87	12235_TRA_Data	06/03/2015 (6) 16:37:47.23	06/03/2015 (6)	16:37:47.230000	7.0689	12235_TRA_Data, 16:37:47 (24.4 sec)	3.95	0.15	0.27	0.01	0.70224			0.10813	0.00099	0.2554	0.07	0.063	no value	NAN	1617	30	1535	51	1400	1200	1753	17	336	nan	40	nan	55	nan	396	nan	293	nan	1704	nan	1	nan	3.7037	0.137174	10	nan	2612296367427700	nan	s71226120405_87
s71226120405_88	12236_TRA_Data	06/03/2015 (6) 16:39:09.56	06/03/2015 (6)	16:39:09.560000	24.115	12236_TRA_Data, 16:39:10 (24.1 sec)	3.1	0.11	0.2445	0.0091	0.7794			0.09176	0.00089	0.39488	0.079	0.069	no value	NAN	1427	27	1407	47	1500	1300	1453	18	36	nan	3	nan	8	nan	267	nan	269	nan	1935	nan	1	nan	4.08998	0.152224	1	nan	1688763787702060	nan	s71226120405_88
s71226120405_89	12237_TRA_Data	06/03/2015 (6) 16:40:32.77	06/03/2015 (6)	16:40:32.770000	23.914	12237_TRA_Data, 16:40:33 (23.9 sec)	3.33	0.12	0.2592	0.0095	0.48268			0.0931	0.0011	0.52491	0.077	0.067	no value	NAN	1484	28	1484	49	1500	1300	1471	23	109	nan	10	nan	19	nan	72	nan	70	nan	494	nan	1	nan	3.85803	0.141401	-6	nan	483065998251888	nan	s71226120405_89
s71226120405_90	12238_TRA_Data	06/03/2015 (6) 16:41:55.25	06/03/2015 (6)	16:41:55.250000	25.426	12238_TRA_Data, 16:41:55 (25.4 sec)	1.926	0.068	0.1826	0.0066	0.56155			0.07631	0.00077	0.46463	0.055	0.048	no value	NAN	1089	23	1080	36	1080	920	1090	20	140	nan	11	nan	12	nan	187	nan	89	nan	444	nan	2	nan	5.47645	0.197944	-5	nan	804581585469028	nan	s71226120405_90
s71226120405_91	12239_TRA_Data	06/03/2015 (6) 16:43:18.52	06/03/2015 (6)	16:43:18.520000	25.157	12239_TRA_Data, 16:43:19 (25.1 sec)	1.7	0.06	0.1666	0.0061	0.70488			0.07402	0.00072	0.44313	0.051	0.045	no value	NAN	1005	23	992	34	1010	870	1028	20	249	nan	18	nan	42	nan	353	nan	321	nan	1513	nan	1	nan	6.0024	0.219776	-4	nan	1506789632596220	nan	s71226120405_91
s71226120405_92	12240_TRA_Data	06/03/2015 (6) 16:44:41.13	06/03/2015 (6)	16:44:41.130000	24.552	12240_TRA_Data, 16:44:41 (24.5 sec)	2.381	0.084	0.2099	0.0077	0.54749			0.08216	0.0009	0.475	0.063	0.055	no value	NAN	1234	25	1226	41	1200	1000	1233	22	29	nan	2	nan	1	nan	116	nan	75	nan	424	nan	2	nan	4.76417	0.17477	-4	nan	593335849335510	nan	s71226120405_92
s71226120405_93	12241_TRA_Data	06/03/2015 (6) 16:46:04.63	06/03/2015 (6)	16:46:04.630000	24.048	12241_TRA_Data, 16:46:05 (24 sec)	3.75	0.13	0.2724	0.0099	0.50062			0.0998	0.0011	0.47786	0.078	0.069	no value	NAN	1578	29	1552	51	1500	1300	1602	22	67	nan	6	nan	12	nan	70	nan	67	nan	498	nan	1	nan	3.67107	0.13342	0	nan	495932786771568	nan	s71226120405_93
s71226120405_94	12243_TRA_Data	06/03/2015 (6) 16:48:53.95	06/03/2015 (6)	16:48:53.950000	21.731	12243_TRA_Data, 16:48:49 (26.2 sec)	13.36	0.47	0.521	0.019	0.84362			0.1852	0.0016	0.44429	0.101	0.091	no value	NAN	2697	33	2695	82	1900	1700	2694	15	2	nan	-3	nan	0	nan	202	nan	24	nan	184	nan	18	nan	1.91939	0.0699968	0	nan	2469929941050390	nan	s71226120405_94
s71226120405_95	12250_TRA_Data	06/03/2015 (6) 16:58:49.03	06/03/2015 (6)	16:58:49.030000	24.653	12250_TRA_Data, 16:58:49 (24.6 sec)	1.954	0.071	0.1833	0.0068	0.37681			0.0775	0.0011	0.50727	0.057	0.05	no value	NAN	1096	25	1083	37	1110	950	1105	29	39	nan	3	nan	5	nan	46	nan	27	nan	146	nan	2	nan	5.45554	0.202388	-14	nan	202339026493676	nan	s71226120405_95
s71226120405_96	12251_TRA_Data	06/03/2015 (6) 17:00:11.97	06/03/2015 (6)	17:00:11.970000	21.823	12251_TRA_Data, 17:00:12 (23.7 sec)	3.86	0.14	0.279	0.01	0.74622			0.09992	0.00095	0.424	0.08	0.073	no value	NAN	1601	29	1586	52	1600	1400	1613	18	201	nan	21	nan	81	nan	139	nan	298	nan	2305	nan	0	nan	3.58423	0.128467	0	nan	1217296714832580	nan	s71226120405_96
s71226120405_97	12252_TRA_Data	06/03/2015 (6) 17:01:35.15	06/03/2015 (6)	17:01:35.150000	14.757	12252_TRA_Data, 17:01:35 (25.5 sec)	1.619	0.062	0.1624	0.0061	0.56583			0.0732	0.001	0.49714	0.043	0.035	no value	NAN	976	23	970	34	850	690	997	28	49	nan	4	nan	8	nan	156	nan	126	nan	495	nan	1	nan	6.15763	0.231291	-7	nan	645271224936457	nan	s71226120405_97
s71226120405_98	12253_TRA_Data	06/03/2015 (6) 17:03:05.75	06/03/2015 (6)	17:03:05.750000	16.932	12253_TRA_Data, 17:02:58 (25 sec)	7.17	0.24	0.388	0.014	0.77421			0.133	0.0012	0.48318	0.113	0.095	no value	NAN	2128	31	2109	65	2200	1700	2132	16	674	nan	89	nan	162	nan	343	nan	483	nan	5317	nan	1	nan	2.57732	0.0929961	0	nan	3593647596901200	nan	s71226120405_98
s71226120405_99	12254_TRA_Data	06/03/2015 (6) 17:04:20.59	06/03/2015 (6)	17:04:20.590000	25.09	12254_TRA_Data, 17:04:21 (25 sec)	3.92	0.14	0.287	0.011	0.52465			0.099	0.0011	0.50237	0.085	0.074	no value	NAN	1614	29	1622	53	1600	1400	1594	21	145	nan	19	nan	6	nan	224	nan	94	nan	706	nan	2	nan	3.48432	0.133545	-5	nan	1485495129577770	nan	s71226120405_99
s71226120405_100	12255_TRA_Data	06/03/2015 (6) 17:05:43.30	06/03/2015 (6)	17:05:43.300000	24.384	12255_TRA_Data, 17:05:43 (24.3 sec)	1.847	0.067	0.1789	0.0066	0.45343			0.07486	0.00099	0.43722	0.054	0.047	no value	NAN	1059	24	1060	36	1060	900	1038	27	4	nan	1	nan	0	nan	65	nan	31	nan	156	nan	2	nan	5.58971	0.206216	-21	nan	274337976237509	nan	s71226120405_100
s71226120405_101	12256_TRA_Data	06/03/2015 (6) 17:07:06.13	06/03/2015 (6)	17:07:06.130000	24.552	12256_TRA_Data, 17:07:06 (24.5 sec)	3.93	0.14	0.285	0.01	0.6024			0.0998	0.001	0.53358	0.085	0.074	no value	NAN	1617	28	1615	52	1600	1400	1610	19	133	nan	12	nan	36	nan	131	nan	206	nan	1669	nan	1	nan	3.50877	0.123115	-2	nan	1062549643784150	nan	s71226120405_101
s71226120405_102	12257_TRA_Data	06/03/2015 (6) 17:08:28.45	06/03/2015 (6)	17:08:28.450000	25.098	12257_TRA_Data, 17:08:28 (26.2 sec)	1.742	0.062	0.1739	0.0063	0.54866			0.07294	0.00081	0.43203	0.051	0.045	no value	NAN	1021	23	1033	35	1000	860	995	23	77	nan	5	nan	17	nan	135	nan	155	nan	732	nan	1	nan	5.75043	0.208325	-19	nan	628797476155056	nan	s71226120405_102
s71226120405_103	12258_TRA_Data	06/03/2015 (6) 17:09:59.77	06/03/2015 (6)	17:09:59.770000	15.911	12258_TRA_Data, 17:09:52 (23.8 sec)	4.2	0.15	0.282	0.01	0.80059			0.1071	0.0011	0.40943	0.091	0.077	no value	NAN	1670	29	1598	52	1800	1400	1740	18	345	nan	37	nan	21	nan	272	nan	95	nan	838	nan	3	nan	3.5461	0.125748	7	nan	1757866082606870	nan	s71226120405_103
s71226120405_104	12259_TRA_Data	06/03/2015 (6) 17:11:18.08	06/03/2015 (6)	17:11:18.080000	18.582	12259_TRA_Data, 17:11:14 (25.7 sec)	2.736	0.099	0.2324	0.0085	0.82098			0.08563	0.00086	0.30612	0.085	0.071	no value	NAN	1332	27	1344	45	1600	1300	1319	19	-74	nan	-8	nan	-17	nan	265	nan	186	nan	1220	nan	2	nan	4.30293	0.157379	-6	nan	1403158639202140	nan	s71226120405_104
s71226120405_105	12260_TRA_Data	06/03/2015 (6) 17:12:37.32	06/03/2015 (6)	17:12:37.320000	10.999	12260_TRA_Data, 17:12:37 (25.3 sec)	3.45	0.13	0.263	0.01	0.48886			0.0963	0.001	0.5575	0.076	0.081	no value	NAN	1514	29	1503	52	1500	1500	1533	19	48	nan	5	nan	8	nan	72	nan	71	nan	486	nan	1	nan	3.80228	0.144573	-1	nan	493327174650278	nan	s71226120405_105
s71226120405_106	12261_TRA_Data	06/03/2015 (6) 17:13:59.95	06/03/2015 (6)	17:13:59.950000	25.728	12261_TRA_Data, 17:14:00 (25.7 sec)	3.99	0.14	0.288	0.011	0.57577			0.1002	0.001	0.54966	0.081	0.071	no value	NAN	1628	28	1630	52	1600	1300	1615	20	87	nan	9	nan	23	nan	93	nan	142	nan	1100	nan	1	nan	3.47222	0.13262	-3	nan	758112462444114	nan	s71226120405_106
s71226120405_107	12262_TRA_Data	06/03/2015 (6) 17:15:23.36	06/03/2015 (6)	17:15:23.360000	25.325	12262_TRA_Data, 17:15:23 (25.3 sec)	2.674	0.097	0.2285	0.0084	0.42775			0.0856	0.0012	0.44467	0.067	0.058	no value	NAN	1316	27	1324	44	1300	1100	1302	27	26	nan	2	nan	5	nan	44	nan	37	nan	229	nan	1	nan	4.37637	0.160882	-15	nan	253467430861303	nan	s71226120405_107
s71226120405_108	12263_TRA_Data	06/03/2015 (6) 17:16:50.16	06/03/2015 (6)	17:16:50.160000	20.521	12263_TRA_Data, 17:16:46 (25 sec)	2.226	0.078	0.2051	0.0074	0.60079			0.07825	0.00076	0.51943	0.062	0.053	no value	NAN	1188	25	1201	40	1200	1000	1143	19	219	nan	17	nan	25	nan	209	nan	134	nan	789	nan	2	nan	4.87567	0.175914	-10	nan	1047119694975710	nan	s71226120405_108
s71226120405_109	12270_TRA_Data	06/03/2015 (6) 17:26:44.15	06/03/2015 (6)	17:26:44.150000	16.457	12270_TRA_Data, 17:26:44 (25.5 sec)	1.722	0.064	0.1725	0.0065	0.71156			0.07304	0.0007	0.49133	0.049	0.045	no value	NAN	1013	23	1025	36	970	860	1000	20	263	nan	22	nan	0	nan	573	nan	85	nan	405	nan	12	nan	5.7971	0.218442	-7	nan	2126006943976180	nan	s71226120405_109
s71226120405_110	12271_TRA_Data	06/03/2015 (6) 17:28:07.72	06/03/2015 (6)	17:28:07.720000	24.955	12271_TRA_Data, 17:28:08 (24.9 sec)	2.475	0.088	0.2142	0.0078	0.54647			0.08353	0.00098	0.47088	0.063	0.055	no value	NAN	1262	26	1250	42	1200	1100	1263	23	35	nan	2	nan	2	nan	76	nan	26	nan	157	nan	3	nan	4.66853	0.170003	-7	nan	381064834670049	nan	s71226120405_110
s71226120405_111	12272_TRA_Data	06/03/2015 (6) 17:29:36.57	06/03/2015 (6)	17:29:36.570000	18.107	12272_TRA_Data, 17:29:30 (24.7 sec)	1.726	0.06	0.1679	0.0061	0.52333			0.07406	0.00088	0.39766	0.079	0.066	no value	NAN	1016	23	999	33	1300	1000	1024	24	129	nan	10	nan	0	nan	125	nan	3	nan	25	nan	189	nan	5.95593	0.216386	-3	nan	447806377723376	nan	s71226120405_111
s71226120405_112	12273_TRA_Data	06/03/2015 (6) 17:30:52.76	06/03/2015 (6)	17:30:52.760000	24.922	12273_TRA_Data, 17:30:53 (24.9 sec)	4.04	0.14	0.289	0.011	0.5481			0.1017	0.0011	0.53376	0.086	0.076	no value	NAN	1640	29	1635	53	1700	1400	1643	19	176	nan	19	nan	28	nan	131	nan	98	nan	779	nan	1	nan	3.46021	0.131703	-2	nan	924802762587894	nan	s71226120405_112
s71226120405_113	12274_TRA_Data	06/03/2015 (6) 17:32:14.56	06/03/2015 (6)	17:32:14.560000	25.123	12274_TRA_Data, 17:32:15 (25.1 sec)	4.04	0.14	0.289	0.011	0.52785			0.1013	0.0011	0.49265	0.09	0.079	no value	NAN	1640	29	1634	52	1700	1500	1633	20	61	nan	6	nan	9	nan	68	nan	67	nan	541	nan	1	nan	3.46021	0.131703	-4	nan	510751525708696	nan	s71226120405_113
s71226120405_114	12275_TRA_Data	06/03/2015 (6) 17:33:37.09	06/03/2015 (6)	17:33:37.090000	25.594	12275_TRA_Data, 17:33:37 (25.5 sec)	3.94	0.14	0.288	0.01	0.52801			0.0994	0.0011	0.49226	0.086	0.075	no value	NAN	1618	29	1627	52	1700	1400	1600	20	21	nan	2	nan	-2	nan	108	nan	83	nan	637	nan	1	nan	3.47222	0.120563	-4	nan	756993756307142	nan	s71226120405_114
s71226120405_115	12276_TRA_Data	06/03/2015 (6) 17:35:00.05	06/03/2015 (6)	17:35:00.050000	25.627	12276_TRA_Data, 17:35:00 (25.6 sec)	4.21	0.15	0.297	0.011	0.67182			0.10273	0.00093	0.5364	0.09	0.079	no value	NAN	1673	29	1674	54	1700	1500	1665	17	125	nan	14	nan	34	nan	310	nan	404	nan	3252	nan	1	nan	3.367	0.124704	-2	nan	2489641268348850	nan	s71226120405_115
s71226120405_116	12277_TRA_Data	06/03/2015 (6) 17:36:21.50	06/03/2015 (6)	17:36:21.500000	16.734	12277_TRA_Data, 17:36:22 (25.4 sec)	3.18	0.23	0.2414	0.0093	0.70125			0.0961	0.0039	0.45735	0.07	0.14	no value	NAN	1450	36	1391	48	1400	2400	1545	46	117	nan	13	nan	12	nan	359	nan	112	nan	756	nan	3	nan	4.1425	0.159591	8	nan	1974531432967610	nan	s71226120405_116
s71226120405_117	12278_TRA_Data	06/03/2015 (6) 17:37:44.93	06/03/2015 (6)	17:37:44.930000	24.754	12278_TRA_Data, 17:37:45 (24.7 sec)	2.04	0.075	0.1917	0.0071	0.37363			0.0777	0.0012	0.43295	0.059	0.052	no value	NAN	1123	25	1129	38	1160	980	1098	31	26	nan	2	nan	3	nan	43	nan	22	nan	119	nan	2	nan	5.21648	0.193203	-23	nan	199320202357389	nan	s71226120405_117
s71226120405_118	12279_TRA_Data	06/03/2015 (6) 17:39:11.28	06/03/2015 (6)	17:39:11.280000	20.404	12279_TRA_Data, 17:39:07 (24.1 sec)	3.46	0.12	0.2595	0.0094	0.63123			0.09597	0.00093	0.51217	0.081	0.07	no value	NAN	1513	28	1486	48	1600	1300	1536	18	147	nan	14	nan	45	nan	137	nan	224	nan	1756	nan	1	nan	3.85357	0.13959	1	nan	1041421799618880	nan	s71226120405_118
s71226120405_119	12280_TRA_Data	06/03/2015 (6) 17:40:31.00	06/03/2015 (6)	17:40:31	23.678	12280_TRA_Data, 17:40:31 (23.6 sec)	2.239	0.082	0.2043	0.0075	0.47647			0.0797	0.0011	0.39996	0.06	0.052	no value	NAN	1188	26	1196	40	1200	1000	1163	27	2	nan	0	nan	2	nan	55	nan	45	nan	252	nan	1	nan	4.89476	0.17969	-21	nan	279387615503081	nan	s71226120405_119
s71226120405_120	12281_TRA_Data	06/03/2015 (6) 17:41:52.65	06/03/2015 (6)	17:41:52.650000	26.03	12281_TRA_Data, 17:41:53 (26 sec)	1.595	0.057	0.1619	0.0059	0.3895			0.07184	0.00091	0.50761	0.05	0.044	no value	NAN	966	23	966	33	990	850	954	26	8	nan	0	nan	1	nan	79	nan	56	nan	259	nan	1	nan	6.17665	0.225091	-27	nan	314739030251374	nan	s71226120405_120
s71226120405_121	12282_TRA_Data	06/03/2015 (6) 17:43:15.25	06/03/2015 (6)	17:43:15.250000	25.426	12282_TRA_Data, 17:43:15 (25.4 sec)	4.48	0.16	0.302	0.011	0.63672			0.1075	0.001	0.51409	0.089	0.078	no value	NAN	1724	30	1697	55	1700	1500	1745	18	106	nan	11	nan	18	nan	100	nan	92	nan	771	nan	1	nan	3.31126	0.120609	1	nan	769180134915640	nan	s71226120405_121
s71226120405_122	12283_TRA_Data	06/03/2015 (6) 17:44:38.02	06/03/2015 (6)	17:44:38.020000	25.661	12283_TRA_Data, 17:44:38 (25.6 sec)	3.92	0.14	0.283	0.01	0.60245			0.10051	0.00095	0.47113	0.083	0.073	no value	NAN	1616	28	1605	52	1600	1400	1625	18	130	nan	12	nan	10	nan	182	nan	80	nan	632	nan	2	nan	3.53357	0.124861	-1	nan	1208534826969570	nan	s71226120405_122
[truncated: 3 more columns]

## Sheet: 7122-6-1-2067m
	Source file	Analyse nr	Date	Time	Duration(s)	Comments	Final207_235	Final207_235_Prop2SE	Final206_238	Final206_238_Prop2SE	ErrorCorrelation_6_38vs7_35	Final238_206	Final238_206_Prop2SE	Final207_206	Final207_206_Prop2SE	ErrorCorrelation_38_6vs7_6	Final208_232	Final208_232_Prop2SE	Final206_208	Final206_208_Prop2SE	FinalAge207_235	FinalAge207_235_Prop2SE	FinalAge206_238	FinalAge206_238_Prop2SE	FinalAge208_232	FinalAge208_232_Prop2SE	FinalAge207_206	FinalAge207_206_Prop2SE	Final206_204	Final206_204_Prop2SE	Final207_204	Final207_204_Prop2SE	Final208_204	Final208_204_Prop2SE	Approx_U_PPM	Approx_U_PPM_Prop2SE	Approx_Th_PPM	Approx_Th_PPM_Prop2SE	Approx_Pb_PPM	Approx_Pb_PPM_Prop2SE	FInal_U_Th_Ratio	FInal_U_Th_Ratio_Prop2SE	Final238_206	Final238_206_Prop2SE	FinalDiscPercent	FinalDiscPercent_Prop2SE	Dose	Dose_Prop2SE	PDP/histogram:
Z_GJ1_1	22317_TRA_Data	3	19/09/2015 (7)	14:05:09.600000	22.512	22317_TRA_Data, 2:05:07 PM (25.6 sec)	0.848	0.015	0.1006	0.0017	0.4471			0.0606	0.00091	0.4945	0.031	0.0021	251	30	620.8	8.1	617.3	9.6	613	42	589	33	-219	nan	-13	nan	-1	nan	410	nan	9	nan	3	nan	46	nan	9.94036	0.167978	-31	nan	875415637376974	nan
Z_GJ1_2	22318_TRA_Data	4	19/09/2015 (7)	14:06:34.460000	20.216	22318_TRA_Data, 2:06:29 PM (25.9 sec)	0.837	0.015	0.1001	0.0017	0.48342			0.06045	0.00093	0.47958	0.0316	0.0025	258	31	616.1	8.3	614	10	622	48	580	34	-194	nan	-12	nan	-1	nan	404	nan	9	nan	3	nan	46	nan	9.99001	0.16966	28	nan	860619270576159	nan
Z_GJ1_3	22337_TRA_Data	23	19/09/2015 (7)	14:32:50.170000	21.515	22337_TRA_Data, 2:32:46 PM (25.4 sec)	0.836	0.015	0.0996	0.0017	0.46099			0.06079	0.00092	0.43564	0.0316	0.0023	285	35	615.7	8.3	612.5	9.7	623	44	593	33	-160	nan	-10	nan	-1	nan	410	nan	9	nan	3	nan	48	nan	10.0402	0.171368	-6	nan	865412977301398	nan
Z_GJ1_4	22338_TRA_Data	24	19/09/2015 (7)	14:34:15.150000	18.506	22338_TRA_Data, 2:34:09 PM (25.9 sec)	0.846	0.016	0.1021	0.0019	0.51911			0.0602	0.00095	0.43011	0.0289	0.0024	304	41	620.9	8.8	626	11	573	47	575	35	-176	nan	-11	nan	-1	nan	400	nan	9	nan	2	nan	47	nan	9.79432	0.182264	20	nan	861355362048116	nan
Z_GJ1_5	22357_TRA_Data	43	19/09/2015 (7)	15:00:24.740000	25.938	22357_TRA_Data, 3:00:25 PM (25.9 sec)	0.83	0.015	0.0998	0.0017	0.45267			0.06027	0.00091	0.50562	0.0302	0.002	282	35	610.4	8.2	613	10	596	39	578	33	-205	nan	-13	nan	-1	nan	414	nan	9	nan	2	nan	49	nan	10.02	0.170682	25	nan	875165649119684	nan
Z_GJ1_6	22358_TRA_Data	44	19/09/2015 (7)	15:01:47.220000	24.459	22358_TRA_Data, 3:01:47 PM (24.4 sec)	0.835	0.016	0.0999	0.0018	0.33347			0.0609	0.001	0.29481	0.0283	0.002	348	39	611.1	8.8	612	11	558	39	579	35	-210	nan	-13	nan	-1	nan	415	nan	9	nan	2	nan	49	nan	10.01	0.180361	33	nan	873675393334567	nan
Z_GJ1_7	22377_TRA_Data	63	19/09/2015 (7)	15:28:06.360000	24.325	22377_TRA_Data, 3:28:06 PM (24.3 sec)	0.817	0.015	0.0989	0.0017	0.54556			0.06013	0.0009	0.44129	0.0308	0.0022	296	37	605.4	8.3	607	10	607	42	573	32	-187	nan	-12	nan	-1	nan	414	nan	8	nan	2	nan	52	nan	10.1112	0.173803	10	nan	866941599017046	nan
Z_GJ1_8	22378_TRA_Data	64	19/09/2015 (7)	15:29:29.350000	25.333	22378_TRA_Data, 3:29:29 PM (25.3 sec)	0.844	0.015	0.1011	0.0017	0.50315			0.06082	0.0009	0.43203	0.0332	0.0022	280	33	618.4	8.3	620.2	9.9	654	42	593	31	-155	nan	-10	nan	-1	nan	406	nan	8	nan	2	nan	51	nan	9.8912	0.166321	-26	nan	868973132590236	nan
Z_GJ1_9	22397_TRA_Data	83	19/09/2015 (7)	15:55:49.110000	25.568	22397_TRA_Data, 3:55:49 PM (25.5 sec)	0.84	0.015	0.0999	0.0017	0.46292			0.06098	0.00089	0.37341	0.0305	0.0021	285	34	615.7	8.1	613.3	9.8	602	41	591	31	-332	nan	-21	nan	-2	nan	408	nan	8	nan	2	nan	51	nan	10.01	0.170341	-11	nan	864586691971979	nan
Z_GJ1_10	22398_TRA_Data	84	19/09/2015 (7)	15:57:11.250000	25.434	22398_TRA_Data, 3:57:11 PM (25.4 sec)	0.828	0.015	0.1	0.0019	0.44988			0.0605	0.00092	0.46659	0.0317	0.0021	288	33	609.9	8.4	613	11	626	40	585	32	-273	nan	-17	nan	-1	nan	410	nan	8	nan	2	nan	52	nan	10	0.19	-18	nan	861543352784858	nan
Z_GJ1_11	22417_TRA_Data	103	19/09/2015 (7)	16:23:31.420000	24.258	22417_TRA_Data, 4:23:31 PM (24.2 sec)	0.83	0.015	0.0995	0.0018	0.49499			0.06015	0.0009	0.47933	0.0332	0.0023	274	34	611.1	8.1	611	10	652	44	569	32	-631	nan	-39	nan	-4	nan	389	nan	8	nan	2	nan	53	nan	10.0503	0.181814	0	nan	820945094640443	nan
Z_GJ1_12	22418_TRA_Data	104	19/09/2015 (7)	16:24:53.990000	23.686	22418_TRA_Data, 4:24:54 PM (23.6 sec)	0.821	0.015	0.0992	0.0019	0.051424			0.0605	0.001	0.13458	0.034	0.0025	310	37	604.4	8.6	607	11	668	48	570	34	-356	nan	-22	nan	-2	nan	394	nan	7	nan	2	nan	55	nan	10.0807	0.193077	-23	nan	822703068320329	nan
Z_GJ1_13	22437_TRA_Data	123	19/09/2015 (7)	16:51:20.250000	18.482	22437_TRA_Data, 4:51:15 PM (24.9 sec)	0.825	0.015	0.0986	0.0016	0.54883			0.05993	0.00086	0.46098	0.0322	0.0023	328	45	608.7	8	605.7	9.6	635	45	570	32	1075	nan	60	nan	8	nan	400	nan	8	nan	2	nan	51	nan	10.142	0.164576	4	nan	837776146262377	nan
Z_GJ1_14	22438_TRA_Data	124	19/09/2015 (7)	16:52:40.780000	20.679	22438_TRA_Data, 4:52:37 PM (25.8 sec)	0.843	0.016	0.1014	0.0019	0.036836			0.0604	0.001	0.1768	0.0325	0.0023	345	43	617.1	8.6	621	11	639	45	576	34	-279	nan	-17	nan	-1	nan	389	nan	8	nan	2	nan	51	nan	9.86193	0.18479	-10	nan	834913020466732	nan
Z_GJ1_15	22457_TRA_Data	143	19/09/2015 (7)	17:18:56.490000	21.957	22457_TRA_Data, 5:18:57 PM (25.7 sec)	0.826	0.015	0.1	0.0018	0.45828			0.06001	0.00099	0.5281	0.0303	0.0022	553	84	607.9	8.3	613	10	597	42	562	35	-506	nan	-29	nan	-3	nan	416	nan	8	nan	2	nan	52	nan	10	0.18	-3	nan	873692392062568	nan
Z_GJ1_16	22458_TRA_Data	144	19/09/2015 (7)	17:20:25.770000	18.185	22458_TRA_Data, 5:20:19 PM (25.4 sec)	0.841	0.015	0.0999	0.0018	0.033944			0.06082	0.00098	0.071566	0.0331	0.0026	499	82	616.2	8.5	612	10	650	50	594	34	-80	nan	-5	nan	0	nan	390	nan	8	nan	2	nan	51	nan	10.01	0.180361	-14	nan	823936536760548	nan
Z_GJ1_17	22477_TRA_Data	163	19/09/2015 (7)	17:46:46.890000	23.787	22477_TRA_Data, 5:46:47 PM (23.7 sec)	0.825	0.015	0.0983	0.0018	0.47613			0.06067	0.00092	0.36971	0.0305	0.0021	362	50	606.2	8.4	604	10	601	41	579	32	984	nan	60	nan	4	nan	420	nan	8	nan	2	nan	53	nan	10.1729	0.18628	-2	nan	875166407104436	nan
Z_GJ1_18	22478_TRA_Data	164	19/09/2015 (7)	17:48:07.480000	25.591	22478_TRA_Data, 5:48:09 PM (24.5 sec)	0.821	0.016	0.0981	0.0019	0.57677			0.06048	0.00093	0.43508	0.0333	0.0024	402	50	603.9	8.9	602	11	642	43	583	33	781	nan	48	nan	3	nan	420	nan	8	nan	2	nan	55	nan	10.1937	0.197431	10	nan	862847212863379	nan
Z_GJ1_19	22497_TRA_Data	183	19/09/2015 (7)	18:14:35.140000	22.537	22497_TRA_Data, 6:14:33 PM (24.8 sec)	0.821	0.014	0.099	0.0016	0.51385			0.05997	0.00084	0.51508	0.0334	0.0024	562	92	606.5	7.7	609	9.6	660	47	570	31	156	nan	10	nan	1	nan	422	nan	9	nan	3	nan	49	nan	10.101	0.163249	-23	nan	886791380037145	nan
Z_GJ1_20	22498_TRA_Data	184	19/09/2015 (7)	18:15:59.180000	21.503	22498_TRA_Data, 6:15:56 PM (24.6 sec)	0.835	0.015	0.1	0.0018	0.35165			0.06033	0.00096	0.38884	0.0317	0.0023	610	100	612.3	8.3	614	10	623	45	576	34	196	nan	11	nan	1	nan	415	nan	9	nan	2	nan	50	nan	10	0.18	5	nan	875030089890069	nan
Z_GJ1_21	22517_TRA_Data	203	19/09/2015 (7)	18:42:27.160000	22.516	22517_TRA_Data, 6:42:24 PM (25.8 sec)	0.827	0.015	0.1	0.0017	0.49913			0.05987	0.00088	0.43191	0.0324	0.0023	329	46	609.4	8.2	614.3	9.6	638	45	562	31	26	nan	1	nan	0	nan	409	nan	8	nan	2	nan	50	nan	10	0.17	33	nan	869774544123527	nan
Z_GJ1_22	22518_TRA_Data	204	19/09/2015 (7)	18:43:49.390000	22.291	22518_TRA_Data, 6:43:46 PM (25.9 sec)	0.826	0.014	0.099	0.0017	0.10985			0.06058	0.00091	0.12253	0.0332	0.0023	350	45	608.5	7.9	608	9.7	658	45	589	31	25	nan	1	nan	0	nan	407	nan	8	nan	2	nan	50	nan	10.101	0.173452	-22	nan	853906018168446	nan
Z_GJ1_23	22537_TRA_Data	223	19/09/2015 (7)	19:10:17.180000	22.836	22537_TRA_Data, 7:10:17 PM (24.1 sec)	0.805	0.014	0.0982	0.0017	0.52852			0.0596	0.0009	0.48669	0.0325	0.0023	379	52	597.4	8.2	604	10	645	45	558	33	-41	nan	-3	nan	-1	nan	415	nan	8	nan	2	nan	52	nan	10.1833	0.176289	-14	nan	860597168511074	nan
Z_GJ1_24	22538_TRA_Data	224	19/09/2015 (7)	19:11:37.050000	27.361	22538_TRA_Data, 7:11:39 PM (26.1 sec)	0.825	0.014	0.1009	0.0017	0.45621			0.05948	0.00088	0.46885	0.0339	0.0023	311	42	609.1	7.9	618.9	9.9	665	45	542	32	-35	nan	-2	nan	0	nan	401	nan	8	nan	2	nan	52	nan	9.9108	0.166981	100	nan	860790167775331	nan
Z_GJ1_25	22557_TRA_Data	243	19/09/2015 (7)	19:38:06.720000	24.963	22557_TRA_Data, 7:38:07 PM (24.9 sec)	0.823	0.015	0.0992	0.0018	0.060991			0.06032	0.00091	0.040355	0.0318	0.0023	348	43	605.6	8.2	609	10	619	43	567	32	-88	nan	-6	nan	-1	nan	435	nan	9	nan	2	nan	51	nan	10.0807	0.182915	1	nan	911805825519794	nan
Z_GJ1_26	22558_TRA_Data	244	19/09/2015 (7)	19:39:32.470000	21.205	22558_TRA_Data, 7:39:29 PM (24.8 sec)	0.836	0.015	0.1005	0.0017	0.08384			0.06047	0.00096	0.11027	0.0312	0.0023	393	51	613.6	8.2	616	10	615	44	572	34	-92	nan	-5	nan	-1	nan	424	nan	9	nan	2	nan	50	nan	9.95025	0.168313	-2	nan	900046178935297	nan
Z_GJ1_27	22577_TRA_Data	263	19/09/2015 (7)	20:05:57.020000	24.661	22577_TRA_Data, 8:05:57 PM (24.6 sec)	0.831	0.015	0.0992	0.0017	0.32157			0.06097	0.00091	0.23013	0.0336	0.0022	334	41	609.9	8	609	10	664	44	591	31	-133	nan	-8	nan	-1	nan	450	nan	9	nan	3	nan	52	nan	10.0807	0.172753	-2	nan	939255179581714	nan
Z_GJ1_28	22578_TRA_Data	264	19/09/2015 (7)	20:07:23.270000	21.414	22578_TRA_Data, 8:07:20 PM (25.1 sec)	0.817	0.015	0.0991	0.0017	0.51912			0.05967	0.00088	0.41109	0.0294	0.0022	358	45	604.2	8.5	609.6	9.9	580	42	557	33	-101	nan	-6	nan	-1	nan	452	nan	9	nan	3	nan	49	nan	10.0908	0.173102	11	nan	947156363672927	nan
Z_GJ1_29	22597_TRA_Data	283	19/09/2015 (7)	20:33:52.860000	17.27	22597_TRA_Data, 8:33:46 PM (24.5 sec)	0.812	0.015	0.098	0.0016	0.50409			0.05989	0.0009	0.46509	0.0309	0.0024	283	41	601.7	8.1	602.5	9.7	610	47	566	33	-112	nan	-7	nan	-1	nan	448	nan	9	nan	3	nan	48	nan	10.2041	0.166597	-15	nan	930665160207137	nan
Z_GJ1_30	22598_TRA_Data	284	19/09/2015 (7)	20:35:13.230000	20.451	22598_TRA_Data, 8:35:08 PM (25.2 sec)	0.823	0.014	0.0998	0.0017	0.4585			0.0597	0.00092	0.53209	0.0322	0.0022	296	39	606.9	8	613	10	636	42	558	34	-157	nan	-9	nan	-1	nan	440	nan	9	nan	3	nan	50	nan	10.02	0.170682	-2	nan	931113704864729	nan
Z_GJ1_31	22617_TRA_Data	303	19/09/2015 (7)	21:01:37.250000	24.426	22617_TRA_Data, 9:01:37 PM (24.4 sec)	0.825	0.014	0.0995	0.0017	0.50643			0.05988	0.00087	0.45668	0.0318	0.0022	287	36	608	8	611	10	627	42	562	32	-161	nan	-10	nan	-1	nan	441	nan	9	nan	3	nan	50	nan	10.0503	0.171713	25	nan	925049578096825	nan
Z_GJ1_32	22618_TRA_Data	304	19/09/2015 (7)	21:02:59.180000	25.501	22618_TRA_Data, 9:02:59 PM (25.5 sec)	0.823	0.014	0.0997	0.0017	0.47546			0.06012	0.0009	0.48266	0.0316	0.0021	288	34	607.4	8	612	10	627	41	565	32	-134	nan	-8	nan	-1	nan	441	nan	9	nan	3	nan	51	nan	10.0301	0.171025	-50	nan	924747011358764	nan
Z_GJ1_33	22637_TRA_Data	323	19/09/2015 (7)	21:29:27.520000	25.165	22637_TRA_Data, 9:29:28 PM (25.1 sec)	0.816	0.014	0.0984	0.0016	0.51929			0.05991	0.00086	0.4793	0.0312	0.0021	324	37	603.4	7.8	604	9.4	615	40	567	31	-189	nan	-12	nan	-1	nan	426	nan	8	nan	2	nan	52	nan	10.1626	0.165246	-26	nan	890641510918878	nan
Z_GJ1_34	22638_TRA_Data	324	19/09/2015 (7)	21:30:50.350000	25.333	22638_TRA_Data, 9:30:50 PM (25.3 sec)	0.832	0.015	0.1	0.0017	0.35355			0.06024	0.00088	0.21836	0.0315	0.0021	273	33	609.9	8.2	613.6	9.8	620	41	565	31	-167	nan	-10	nan	-1	nan	417	nan	8	nan	2	nan	53	nan	10	0.17	90	nan	886063741174333	nan
Z_GJ1_35	22657_TRA_Data	343	19/09/2015 (7)	21:57:24.620000	19.063	22657_TRA_Data, 9:57:18 PM (25.3 sec)	0.831	0.014	0.1003	0.0016	0.47124			0.05962	0.00086	0.43982	0.0313	0.0023	332	45	611.6	8.1	615.5	9.4	617	46	562	32	-209	nan	-13	nan	-1	nan	392	nan	8	nan	2	nan	50	nan	9.97009	0.159044	-20	nan	835958813068779	nan
Z_GJ1_36	22658_TRA_Data	344	19/09/2015 (7)	21:58:43.250000	22.181	22658_TRA_Data, 9:58:41 PM (25.1 sec)	0.812	0.014	0.0984	0.0016	0.46471			0.05982	0.00084	0.45212	0.0305	0.0021	340	40	601.2	7.7	604.6	9.1	602	42	563	30	-217	nan	-13	nan	-1	nan	410	nan	8	nan	2	nan	51	nan	10.1626	0.165246	32	nan	854099354326332	nan
		#VALUE!
Z_Plesovice_1	22319_TRA_Data	5	19/09/2015 (7)	14:07:58.460000	19.336	22319_TRA_Data, 2:07:55 PM (24.4 sec)	0.3924	0.0062	0.05308	0.00072	0.49264			0.05299	0.00065	0.3364	0.01631	0.00057	22.01	0.67	335.3	4.5	333.3	4.4	327	11	306	27	-296	nan	-16	nan	-12	nan	1248	nan	188	nan	29	nan	7	nan	18.8395	0.255547	33	nan	1442444948472150	nan
Z_Plesovice_2	22320_TRA_Data	6	19/09/2015 (7)	14:09:20.760000	20.111	22320_TRA_Data, 2:09:17 PM (24.6 sec)	0.3902	0.0058	0.05311	0.00071	0.53589			0.05287	0.00061	0.078822	0.01627	0.00056	22.87	0.69	334.2	4.3	333.5	4.4	326	11	303	25	-283	nan	-15	nan	-11	nan	1208	nan	176	nan	27	nan	7	nan	18.8288	0.251713	116	nan	1393431862314270	nan
Z_Plesovice_3	22339_TRA_Data	25	19/09/2015 (7)	14:35:37.440000	21.909	22339_TRA_Data, 2:35:34 PM (25.5 sec)	0.3888	0.006	0.05311	0.00072	0.18552			0.05275	0.00061	0.096825	0.01592	0.00054	23.43	0.68	332.7	4.4	333.5	4.4	320	11	298	25	-247	nan	-13	nan	-10	nan	1151	nan	166	nan	25	nan	7	nan	18.8288	0.255258	29	nan	1322275685821660	nan
Z_Plesovice_4	22340_TRA_Data	26	19/09/2015 (7)	14:36:56.040000	22.909	22340_TRA_Data, 2:36:56 PM (26.3 sec)	0.3946	0.006	0.05338	0.0007	0.44674			0.05325	0.00059	0.18563	0.01614	0.00055	24	0.71	336.9	4.4	335.1	4.3	323	11	317	24	-225	nan	-12	nan	-9	nan	1181	nan	165	nan	25	nan	7	nan	18.7336	0.245664	94	nan	1368324861514670	nan
Z_Plesovice_5	22359_TRA_Data	45	19/09/2015 (7)	15:03:11.240000	22.757	22359_TRA_Data, 3:03:13 PM (25.6 sec)	0.3849	0.0059	0.05319	0.0007	0.45732			0.05229	0.00059	0.32595	0.01598	0.00054	23.8	0.68	330.2	4.3	334	4.3	320	11	282	25	-257	nan	-14	nan	-11	nan	1165	nan	162	nan	24	nan	7	nan	18.8005	0.247422	5	nan	1343126044837440	nan
Z_Plesovice_6	22360_TRA_Data	46	19/09/2015 (7)	15:04:37.400000	21.258	22360_TRA_Data, 3:04:37 PM (23.2 sec)	0.3861	0.0059	0.05301	0.0007	0.49218			0.05269	0.0006	0.34908	0.01609	0.00056	25	0.76	330.7	4.3	332.9	4.3	323	11	296	25	-243	nan	-13	nan	-9	nan	1110	nan	150	nan	22	nan	7	nan	18.8644	0.249105	18	nan	1274234120739970	nan
Z_Plesovice_7	22379_TRA_Data	65	19/09/2015 (7)	15:30:57.370000	21.312	22379_TRA_Data, 3:30:54 PM (24.3 sec)	0.3865	0.0058	0.05294	0.0007	0.33528			0.05282	0.00062	0.33559	0.01646	0.00058	24.98	0.76	331.1	4.2	332.4	4.3	330	12	300	26	-286	nan	-15	nan	-11	nan	1072	nan	145	nan	22	nan	7	nan	18.8893	0.249764	51	nan	1228372342999470	nan
Z_Plesovice_8	22380_TRA_Data	66	19/09/2015 (7)	15:32:20.510000	23.173	22380_TRA_Data, 3:32:19 PM (24.2 sec)	0.3921	0.0058	0.05351	0.0007	0.47391			0.05301	0.00059	0.38075	0.01673	0.00056	25.94	0.77	335.3	4.2	335.9	4.3	335	11	311	25	-283	nan	-15	nan	-11	nan	1049	nan	136	nan	21	nan	8	nan	18.6881	0.244471	87	nan	1212780320552250	nan
Z_Plesovice_9	22399_TRA_Data	85	19/09/2015 (7)	15:58:41.420000	19.702	22399_TRA_Data, 3:58:37 PM (24.7 sec)	0.385	0.0059	0.05263	0.00071	0.49863			0.05263	0.00062	0.30819	0.01575	0.00055	26.24	0.8	330	4.3	330.5	4.4	316	11	298	26	-280	nan	-15	nan	-10	nan	1026	nan	135	nan	20	nan	8	nan	19.0006	0.256325	38	nan	1171176134178060	nan
Z_Plesovice_10	22400_TRA_Data	86	19/09/2015 (7)	15:59:59.010000	25.669	22400_TRA_Data, 3:59:59 PM (25.6 sec)	0.389	0.0057	0.05286	0.00068	0.21203			0.05299	0.00057	0.18978	0.01604	0.00054	26.73	0.78	332.9	4.1	332	4.1	321	11	305	24	-331	nan	-18	nan	-12	nan	1039	nan	132	nan	20	nan	8	nan	18.9179	0.243363	118	nan	1183983126917930	nan
Z_Plesovice_11	22419_TRA_Data	105	19/09/2015 (7)	16:26:20.880000	24.795	22419_TRA_Data, 4:26:21 PM (24.7 sec)	0.3886	0.0057	0.05304	0.00069	0.48336			0.05263	0.00058	0.40827	0.01612	0.00055	25.62	0.75	332.6	4.1	333	4.2	323	11	293	24	-29	nan	-1	nan	-1	nan	1034	nan	133	nan	20	nan	8	nan	18.8537	0.245269	62	nan	1187502389936900	nan
Z_Plesovice_12	22420_TRA_Data	106	19/09/2015 (7)	16:27:43.420000	24.258	22420_TRA_Data, 4:27:43 PM (24.2 sec)	0.3872	0.0056	0.05292	0.0007	0.4808			0.05268	0.00058	0.42638	0.01588	0.00055	27.6	0.82	331.6	4.1	332.3	4.3	318	11	294	24	-1028	nan	-54	nan	-36	nan	1039	nan	127	nan	19	nan	8	nan	18.8965	0.249953	91	nan	1182046837474730	nan
Z_Plesovice_13	22439_TRA_Data	125	19/09/2015 (7)	16:54:02.550000	25.131	22439_TRA_Data, 4:54:03 PM (25.1 sec)	0.3878	0.0054	0.05285	0.00067	0.44433			0.05255	0.00055	0.45605	0.01618	0.00054	25.54	0.72	332.3	4	331.9	4.1	324	11	289	23	-110	nan	-6	nan	-5	nan	1069	nan	138	nan	21	nan	8	nan	18.9215	0.239875	80	nan	1225479202795400	nan
Z_Plesovice_14	22440_TRA_Data	126	19/09/2015 (7)	16:55:28.090000	21.208	22440_TRA_Data, 4:55:25 PM (24.6 sec)	0.3904	0.0058	0.05277	0.0007	0.48268			0.05293	0.00061	0.37907	0.01596	0.00056	28.28	0.88	333.9	4.3	331.4	4.3	320	11	306	25	-422	nan	-22	nan	-12	nan	1027	nan	123	nan	19	nan	8	nan	18.9502	0.251376	14	nan	1170644502819290	nan
Z_Plesovice_15	22459_TRA_Data	145	19/09/2015 (7)	17:21:45.090000	25.424	22459_TRA_Data, 5:21:45 PM (26.2 sec)	0.3891	0.0056	0.05277	0.00069	0.461			0.05294	0.00057	0.39282	0.01589	0.00052	21.54	0.6	333.3	4.1	331.4	4.2	319	10	307	24	640	nan	33	nan	26	nan	1107	nan	170	nan	26	nan	6	nan	18.9502	0.247785	12	nan	1267300833071910	nan
Z_Plesovice_16	22460_TRA_Data	146	19/09/2015 (7)	17:23:09.970000	22.711	22460_TRA_Data, 5:23:08 PM (24.4 sec)	0.3899	0.0058	0.05315	0.00072	0.48885			0.05264	0.00059	0.4096	0.01594	0.00053	22.27	0.65	333.6	4.2	333.7	4.4	319	11	294	25	-216	nan	-12	nan	-10	nan	1080	nan	165	nan	25	nan	7	nan	18.8147	0.254874	25	nan	1245200359301760	nan
Z_Plesovice_17	22479_TRA_Data	165	19/09/2015 (7)	17:49:37.060000	23.619	22479_TRA_Data, 5:49:37 PM (23.6 sec)	0.3888	0.0058	0.05293	0.00069	0.26663			0.05275	0.0006	0.26023	0.0157	0.00053	22.62	0.68	332.5	4.1	332.4	4.2	315	11	294	25	1007	nan	54	nan	47	nan	1101	nan	166	nan	25	nan	7	nan	18.8929	0.246289	44	nan	1265834081733780	nan
Z_Plesovice_18	22480_TRA_Data	166	19/09/2015 (7)	17:51:00.170000	20.699	22480_TRA_Data, 5:50:57 PM (25.2 sec)	0.3854	0.006	0.05241	0.0007	0.14431			0.05275	0.00062	0.14242	0.01563	0.00053	22.67	0.67	330.2	4.4	329.2	4.3	313	11	295	26	935	nan	51	nan	38	nan	1126	nan	168	nan	25	nan	7	nan	19.0803	0.254841	46	nan	1281869081858420	nan
Z_Plesovice_19	22499_TRA_Data	185	19/09/2015 (7)	18:17:26.850000	18.827	22499_TRA_Data, 6:17:21 PM (24.2 sec)	0.3891	0.0062	0.0528	0.00072	0.3668			0.05292	0.00065	0.29307	0.01623	0.00057	23.38	0.74	332.9	4.5	331.6	4.4	325	11	305	27	209	nan	12	nan	10	nan	1061	nan	158	nan	24	nan	7	nan	18.9394	0.258265	48	nan	1220265815331430	nan
Z_Plesovice_20	22500_TRA_Data	186	19/09/2015 (7)	18:18:47.080000	21.605	22500_TRA_Data, 6:18:44 PM (24.7 sec)	0.3864	0.0059	0.05287	0.00071	0.46968			0.05274	0.00062	0.37621	0.01646	0.00057	23.15	0.69	331.2	4.3	332	4.4	330	11	297	26	202	nan	11	nan	8	nan	1113	nan	165	nan	25	nan	7	nan	18.9143	0.254003	44	nan	1274346832763290	nan
Z_Plesovice_21	22519_TRA_Data	205	19/09/2015 (7)	18:45:11.500000	27.047	22519_TRA_Data, 6:45:12 PM (26.7 sec)	0.3826	0.0055	0.05247	0.00067	0.42794			0.05268	0.00058	0.36042	0.0165	0.00055	23.17	0.66	328.5	4.1	329.6	4.1	331	11	294	24	57	nan	3	nan	2	nan	1109	nan	157	nan	24	nan	7	nan	19.0585	0.243362	56	nan	1261452203080600	nan
Z_Plesovice_22	22520_TRA_Data	206	19/09/2015 (7)	18:46:37.550000	20.054	22520_TRA_Data, 6:46:34 PM (24.2 sec)	0.3867	0.0059	0.05237	0.00072	0.45547			0.0533	0.00063	0.40725	0.01631	0.00056	23.71	0.71	331.2	4.3	328.9	4.4	327	11	321	26	17	nan	1	nan	0	nan	1081	nan	153	nan	23	nan	7	nan	19.0949	0.262523	41	nan	1224593258528320	nan
Z_Plesovice_23	22539_TRA_Data	225	19/09/2015 (7)	19:13:08.400000	20.396	22539_TRA_Data, 7:13:04 PM (25.3 sec)	0.3873	0.006	0.05302	0.00071	0.17049			0.05277	0.00064	0.15175	0.0165	0.00057	24.06	0.72	331.6	4.3	332.9	4.4	331	11	295	26	-147	nan	-8	nan	-7	nan	1033	nan	143	nan	22	nan	7	nan	18.8608	0.252568	-48	nan	1186562679741080	nan
Z_Plesovice_24	22540_TRA_Data	226	19/09/2015 (7)	19:14:28.700000	23.979	22540_TRA_Data, 7:14:27 PM (26 sec)	0.3871	0.0057	0.05304	0.00071	0.44889			0.05262	0.00061	0.44379	0.01612	0.00055	24.71	0.73	331.7	4.1	333.1	4.3	323	11	292	25	-161	nan	-9	nan	-6	nan	1041	nan	143	nan	22	nan	7	nan	18.8537	0.252378	47	nan	1190339305622810	nan
Z_Plesovice_25	22559_TRA_Data	245	19/09/2015 (7)	19:40:55.210000	25.467	22559_TRA_Data, 7:40:55 PM (25.4 sec)	0.389	0.0057	0.05276	0.00068	0.37375			0.05314	0.0006	0.30702	0.0163	0.00054	23.89	0.67	332.8	4.2	331.5	4.2	327	11	310	25	-91	nan	-5	nan	-4	nan	1097	nan	153	nan	23	nan	7	nan	18.9537	0.244286	-18	nan	1257734609481630	nan
Z_Plesovice_26	22560_TRA_Data	246	19/09/2015 (7)	19:42:23.580000	19.096	22560_TRA_Data, 7:42:20 PM (22.6 sec)	0.386	0.0063	0.05303	0.00073	0.52418			0.05249	0.00064	0.30936	0.01647	0.00058	25.19	0.78	330.6	4.6	333	4.5	330	12	287	27	-168	nan	-9	nan	-6	nan	1046	nan	139	nan	21	nan	7	nan	18.8573	0.259585	45	nan	1200329517743520	nan
Z_Plesovice_27	22579_TRA_Data	265	19/09/2015 (7)	20:08:49.730000	22.824	22579_TRA_Data, 8:08:47 PM (26.1 sec)	0.3828	0.0056	0.05272	0.0007	0.43737			0.05245	0.00061	0.45119	0.01598	0.00055	25.37	0.75	328.4	4.1	331.1	4.3	321	11	285	26	-181	nan	-10	nan	-7	nan	1107	nan	151	nan	22	nan	7	nan	18.9681	0.251853	36	nan	1266906126803980	nan
Z_Plesovice_28	22580_TRA_Data	266	19/09/2015 (7)	20:10:08.410000	26.274	22580_TRA_Data, 8:10:08 PM (26.2 sec)	0.3846	0.0054	0.05288	0.00068	0.43813			0.05272	0.00057	0.42186	0.01592	0.00054	25.42	0.74	329.9	4	332	4.2	319	11	299	24	-200	nan	-11	nan	-8	nan	1133	nan	154	nan	22	nan	7	nan	18.9107	0.243179	16	nan	1295174646023630	nan
Z_Plesovice_29	22599_TRA_Data	285	19/09/2015 (7)	20:36:40.180000	20.969	22599_TRA_Data, 8:36:36 PM (26.1 sec)	0.3893	0.006	0.05304	0.00071	0.48746			0.05278	0.00061	0.36257	0.01617	0.00057	25.37	0.8	333.3	4.3	333.1	4.3	324	11	301	25	-191	nan	-10	nan	-8	nan	1054	nan	141	nan	21	nan	7	nan	18.8537	0.252378	30	nan	1212542747242390	nan
Z_Plesovice_30	22600_TRA_Data	286	19/09/2015 (7)	20:38:04.140000	19.537	22600_TRA_Data, 8:37:58 PM (25.6 sec)	0.387	0.0059	0.05302	0.00072	0.44223			0.05252	0.00064	0.42834	0.01635	0.00059	26.24	0.89	331.5	4.3	332.9	4.4	328	12	287	27	-209	nan	-11	nan	-7	nan	1026	nan	134	nan	21	nan	8	nan	18.8608	0.256126	50	nan	1180480930386220	nan
Z_Plesovice_31	22619_TRA_Data	305	19/09/2015 (7)	21:04:31.730000	19.952	22619_TRA_Data, 9:04:26 PM (26 sec)	0.3871	0.0062	0.05287	0.00071	0.27167			0.05255	0.00064	0.14845	0.01586	0.00057	26.02	0.84	331.4	4.5	332	4.3	318	11	287	27	-107	nan	-6	nan	-4	nan	1026	nan	138	nan	20	nan	8	nan	18.9143	0.254003	-8	nan	1178222144745260	nan
Z_Plesovice_32	22620_TRA_Data	306	19/09/2015 (7)	21:05:51.430000	23.254	22620_TRA_Data, 9:05:49 PM (26 sec)	0.3882	0.0059	0.05316	0.0007	0.49972			0.05241	0.00058	0.34938	0.01562	0.00053	27.42	0.84	332.2	4.3	333.8	4.3	313	11	285	25	-215	nan	-11	nan	-8	nan	1053	nan	135	nan	20	nan	8	nan	18.8111	0.247701	49	nan	1208375796183630	nan
Z_Plesovice_33	22639_TRA_Data	325	19/09/2015 (7)	21:32:20.910000	19.076	22639_TRA_Data, 9:32:16 PM (24.6 sec)	0.3827	0.006	0.05245	0.00072	0.43441			0.05258	0.00067	0.18963	0.01622	0.00058	26.37	0.86	328.7	4.4	329.4	4.4	325	11	290	28	-218	nan	-11	nan	-8	nan	1014	nan	129	nan	20	nan	8	nan	19.0658	0.261723	46	nan	1147331832234300	nan
Z_Plesovice_34	22640_TRA_Data	326	19/09/2015 (7)	21:33:42.720000	18.85	22640_TRA_Data, 9:33:39 PM (24.1 sec)	0.3808	0.0059	0.05162	0.00071	0.49612			0.05305	0.00064	0.38155	0.01588	0.00058	27.69	0.92	327.1	4.4	324.6	4.4	318	12	308	27	-219	nan	-12	nan	-8	nan	1020	nan	125	nan	19	nan	8	nan	19.3723	0.266454	36	nan	1139956720295770	nan
Z_Plesovice_35	22659_TRA_Data	345	19/09/2015 (7)	22:00:08.210000	23.582	22659_TRA_Data, 10:00:08 PM (24.3 sec)	0.384	0.0057	0.05276	0.00068	0.093687			0.05245	0.0006	0.056745	0.01534	0.00053	28.43	0.88	329.2	4.1	331.4	4.2	308	11	282	25	-223	nan	-12	nan	-8	nan	974	nan	122	nan	17	nan	8	nan	18.9537	0.244286	18	nan	1107876531787470	nan
Z_Plesovice_36	22660_TRA_Data	346	19/09/2015 (7)	22:01:29.680000	26.005	22660_TRA_Data, 10:01:30 PM (26 sec)	0.3871	0.0056	0.05273	0.00068	0.49667			0.05271	0.00056	0.26742	0.01635	0.00056	28.51	0.86	331.8	4.1	331.1	4.1	328	11	299	24	-182	nan	-10	nan	-7	nan	973	nan	115	nan	17	nan	9	nan	18.9645	0.244564	-332	nan	1107636296093660	nan
		#VALUE!
Z_91500_1	22315_TRA_Data	1	19/09/2015 (7)	14:02:20.050000	24.627	22315_TRA_Data, 2:02:20 PM (24.6 sec)	1.869	0.035	0.1799	0.0029	0.29641			0.0752	0.0013	0.49161	0.0534	0.002	9.43	0.33	1063	13	1065	16	1049	39	1016	37	-70	nan	-5	nan	-7	nan	80	nan	30	nan	15	nan	3	nan	5.55864	0.0896057	-37	nan	331726691503623	nan
Z_91500_2	22316_TRA_Data	2	19/09/2015 (7)	14:03:41.680000	24.997	22316_TRA_Data, 2:03:42 PM (24.9 sec)	1.849	0.035	0.1802	0.0028	0.29603			0.0744	0.0013	0.45632	0.0544	0.0021	9.39	0.33	1056	13	1066	15	1067	40	992	38	-55	nan	-4	nan	-5	nan	80	nan	30	nan	15	nan	3	nan	5.54939	0.086228	-23	nan	333671910568263	nan
Z_91500_3	22335_TRA_Data	21	19/09/2015 (7)	14:29:59.760000	22.131	22335_TRA_Data, 2:30:00 PM (24.7 sec)	1.839	0.035	0.177	0.0028	0.34383			0.0753	0.0013	0.39852	0.0539	0.002	9.3	0.33	1053	13	1049	15	1058	39	1037	35	-55	nan	-4	nan	-6	nan	82	nan	31	nan	15	nan	3	nan	5.64972	0.0893741	-17	nan	336821609837044	nan
Z_91500_4	22336_TRA_Data	22	19/09/2015 (7)	14:31:22.020000	24.661	22336_TRA_Data, 2:31:22 PM (24.6 sec)	1.85	0.035	0.1802	0.0028	0.31004			0.0744	0.0013	0.4372	0.0539	0.002	9.41	0.31	1057	13	1066	15	1057	39	997	36	-56	nan	-4	nan	-6	nan	78	nan	29	nan	15	nan	3	nan	5.54939	0.086228	-22	nan	325769944479144	nan
Z_91500_5	22355_TRA_Data	41	19/09/2015 (7)	14:57:41.960000	20.256	22355_TRA_Data, 2:57:38 PM (24.3 sec)	1.817	0.036	0.1775	0.0028	0.31939			0.0747	0.0014	0.38714	0.0532	0.002	9.21	0.32	1044	13	1052	15	1045	39	1003	39	-86	nan	-7	nan	-9	nan	80	nan	30	nan	15	nan	3	nan	5.6338	0.0888713	-12	nan	329103223417068	nan
Z_91500_6	22356_TRA_Data	42	19/09/2015 (7)	14:59:00.550000	25.131	22356_TRA_Data, 2:59:01 PM (25.1 sec)	1.859	0.034	0.1798	0.0026	0.31566			0.0751	0.0013	0.40801	0.0551	0.002	9.17	0.31	1058	12	1066	15	1081	39	1011	35	-62	nan	-5	nan	-7	nan	80	nan	30	nan	15	nan	3	nan	5.56173	0.0804255	-27	nan	333543287399017	nan
Z_91500_7	22375_TRA_Data	61	19/09/2015 (7)	15:25:20.940000	25.736	22375_TRA_Data, 3:25:21 PM (25.7 sec)	1.852	0.034	0.1803	0.0027	0.3307			0.0751	0.0013	0.41611	0.055	0.002	9.38	0.31	1059	12	1067	15	1081	38	1020	34	-58	nan	-4	nan	-6	nan	79	nan	30	nan	15	nan	3	nan	5.54631	0.0830562	-18	nan	331028107378795	nan
Z_91500_8	22376_TRA_Data	62	19/09/2015 (7)	15:26:44.740000	20.771	22376_TRA_Data, 3:26:43 PM (23.8 sec)	1.831	0.035	0.177	0.0029	0.37124			0.0757	0.0013	0.45035	0.0534	0.002	9.61	0.34	1051	13	1049	16	1048	39	1028	36	-64	nan	-5	nan	-7	nan	81	nan	30	nan	15	nan	3	nan	5.64972	0.092566	-24	nan	330967760370010	nan
Z_91500_9	22395_TRA_Data	81	19/09/2015 (7)	15:53:01.950000	23.715	22395_TRA_Data, 3:53:02 PM (24.8 sec)	1.825	0.033	0.1783	0.0027	0.29111			0.0742	0.0012	0.45477	0.0528	0.0019	9.28	0.3	1048	12	1056	15	1037	37	1003	34	-86	nan	-7	nan	-10	nan	81	nan	31	nan	15	nan	3	nan	5.60853	0.08493	-32	nan	333314779156556	nan
Z_91500_10	22396_TRA_Data	82	19/09/2015 (7)	15:54:24.680000	24.997	22396_TRA_Data, 3:54:25 PM (24.9 sec)	1.864	0.035	0.1804	0.0028	0.31135			0.0748	0.0012	0.42266	0.0536	0.0019	9.46	0.31	1060	12	1067	15	1054	37	1014	35	-106	nan	-8	nan	-11	nan	78	nan	29	nan	15	nan	3	nan	5.54324	0.0860369	-17	nan	325946913248038	nan
Z_91500_11	22415_TRA_Data	101	19/09/2015 (7)	16:20:46.060000	22.519	22415_TRA_Data, 4:20:44 PM (25.3 sec)	1.858	0.034	0.1785	0.0027	0.31308			0.0749	0.0012	0.46902	0.0524	0.0019	9.28	0.3	1060	12	1057	15	1031	37	1033	33	-144	nan	-11	nan	-16	nan	82	nan	30	nan	15	nan	3	nan	5.60224	0.0847398	-29	nan	335352849000630	nan
Z_91500_12	22416_TRA_Data	102	19/09/2015 (7)	16:22:07.650000	25.03	22416_TRA_Data, 4:22:08 PM (25 sec)	1.856	0.034	0.1791	0.0028	0.075543			0.0752	0.0012	0.26065	0.0546	0.002	9.35	0.33	1058	12	1061	15	1072	38	1019	34	-200	nan	-16	nan	-22	nan	80	nan	30	nan	15	nan	3	nan	5.58347	0.0872905	-23	nan	332791352016015	nan
Z_91500_13	22435_TRA_Data	121	19/09/2015 (7)	16:48:28.460000	24.224	22435_TRA_Data, 4:48:28 PM (24.2 sec)	1.859	0.035	0.1803	0.0027	0.35592			0.0745	0.0013	0.36439	0.0533	0.0019	9.45	0.31	1058	12	1067	15	1046	37	1001	35	29	nan	2	nan	3	nan	80	nan	30	nan	15	nan	3	nan	5.54631	0.0830562	-36	nan	332536338901842	nan
Z_91500_14	22436_TRA_Data	122	19/09/2015 (7)	16:49:50.780000	24.896	22436_TRA_Data, 4:49:51 PM (24.8 sec)	1.857	0.035	0.1807	0.0027	0.34399			0.0739	0.0012	0.42196	0.0533	0.0019	9.28	0.3	1058	12	1070	15	1047	36	982	35	54	nan	4	nan	7	nan	79	nan	30	nan	15	nan	3	nan	5.53403	0.0826889	-21	nan	330457977420399	nan
Z_91500_15	22455_TRA_Data	141	19/09/2015 (7)	17:16:11.050000	24.627	22455_TRA_Data, 5:16:11 PM (24.6 sec)	1.844	0.033	0.179	0.0027	0.29865			0.0747	0.0013	0.45	0.0534	0.0019	9.34	0.3	1056	12	1059	15	1049	36	1003	34	12	nan	1	nan	2	nan	81	nan	30	nan	15	nan	3	nan	5.58659	0.084267	-17	nan	333110835955235	nan
Z_91500_16	22456_TRA_Data	142	19/09/2015 (7)	17:17:32.880000	24.795	22456_TRA_Data, 5:17:33 PM (24.7 sec)	1.86	0.034	0.1789	0.0027	0.33232			0.075	0.0012	0.42403	0.0535	0.0019	9.32	0.3	1060	12	1060	15	1053	36	1015	34	74	nan	6	nan	9	nan	80	nan	30	nan	15	nan	3	nan	5.58971	0.0843613	-32	nan	332062541354563	nan
Z_91500_17	22475_TRA_Data	161	19/09/2015 (7)	17:44:05.400000	18.141	22475_TRA_Data, 5:44:00 PM (24.1 sec)	1.819	0.035	0.1786	0.0029	0.23353			0.0737	0.0014	0.52279	0.0502	0.002	9.66	0.34	1046	13	1058	16	988	38	978	40	1022	nan	74	nan	101	nan	79	nan	30	nan	15	nan	3	nan	5.5991	0.0909149	-39	nan	327865280619379	nan
Z_91500_18	22476_TRA_Data	162	19/09/2015 (7)	17:45:25.280000	21.974	22476_TRA_Data, 5:45:22 PM (25.5 sec)	1.865	0.034	0.1794	0.0027	0.27077			0.0751	0.0013	0.43665	0.0531	0.0019	9.18	0.3	1064	12	1062	15	1046	37	1024	35	459	nan	34	nan	48	nan	81	nan	30	nan	15	nan	3	nan	5.57414	0.0838917	-34	nan	335538668143096	nan
Z_91500_19	22495_TRA_Data	181	19/09/2015 (7)	18:11:46.980000	24.315	22495_TRA_Data, 6:11:47 PM (25.7 sec)	1.875	0.034	0.1788	0.0027	0.32916			0.0762	0.0013	0.45721	0.0546	0.002	9.52	0.32	1065	12	1059	15	1072	39	1044	35	54	nan	4	nan	5	nan	80	nan	30	nan	15	nan	3	nan	5.59284	0.0844557	-16	nan	330909033964768	nan
Z_91500_20	22496_TRA_Data	182	19/09/2015 (7)	18:13:09.640000	26.038	22496_TRA_Data, 6:13:10 PM (26 sec)	1.864	0.033	0.1799	0.0027	0.32939			0.0749	0.0012	0.44737	0.0547	0.002	9.42	0.3	1062	12	1065	15	1074	38	1023	33	51	nan	4	nan	6	nan	80	nan	30	nan	15	nan	3	nan	5.55864	0.083426	-21	nan	333340904047696	nan
Z_91500_21	22515_TRA_Data	201	19/09/2015 (7)	18:39:37.280000	25.4	22515_TRA_Data, 6:39:37 PM (25.4 sec)	1.856	0.033	0.1791	0.0026	0.25166			0.0755	0.0012	0.45187	0.0537	0.0019	9.34	0.3	1059	12	1061	14	1057	36	1032	34	5	nan	0	nan	1	nan	81	nan	30	nan	15	nan	3	nan	5.58347	0.0810554	-28	nan	332649721947585	nan
Z_91500_22	22516_TRA_Data	202	19/09/2015 (7)	18:41:03.760000	19.36	22516_TRA_Data, 6:40:59 PM (25.4 sec)	1.863	0.038	0.1777	0.0029	0.29665			0.076	0.0014	0.42581	0.0554	0.0021	9.13	0.32	1059	13	1053	16	1088	41	1043	39	7	nan	0	nan	1	nan	79	nan	30	nan	15	nan	3	nan	5.62746	0.0918381	-21	nan	324437651719748	nan
Z_91500_23	22535_TRA_Data	221	19/09/2015 (7)	19:07:29.750000	24.93	22535_TRA_Data, 7:07:30 PM (24.9 sec)	1.86	0.035	0.1784	0.0027	0.326			0.0758	0.0013	0.42487	0.0542	0.0019	9.3	0.3	1058	13	1057	15	1064	37	1037	35	-25	nan	-2	nan	-2	nan	81	nan	30	nan	15	nan	3	nan	5.60538	0.0848348	-17	nan	332514780691039	nan
Z_91500_24	22536_TRA_Data	222	19/09/2015 (7)	19:08:50.260000	26.286	22536_TRA_Data, 7:08:52 PM (25.9 sec)	1.859	0.033	0.1812	0.0027	0.35775			0.0745	0.0011	0.40093	0.0543	0.0019	9.39	0.29	1062	12	1072	15	1067	37	1011	32	-26	nan	-2	nan	-3	nan	81	nan	30	nan	15	nan	3	nan	5.51876	0.0822332	-23	nan	337366921270333	nan
Z_91500_25	22555_TRA_Data	241	19/09/2015 (7)	19:35:20.510000	26.173	22555_TRA_Data, 7:35:21 PM (26.1 sec)	1.855	0.033	0.1798	0.0026	0.3122			0.0749	0.0012	0.3942	0.0547	0.002	9.18	0.3	1059	12	1064	14	1075	38	1021	32	-36	nan	-3	nan	-4	nan	78	nan	30	nan	15	nan	3	nan	5.56173	0.0804255	-30	nan	325688842763151	nan
Z_91500_26	22556_TRA_Data	242	19/09/2015 (7)	19:36:42.690000	23.989	22556_TRA_Data, 7:36:43 PM (23.9 sec)	1.814	0.034	0.1779	0.0027	0.32145			0.074	0.0013	0.45609	0.0545	0.002	9.64	0.36	1042	12	1054	15	1073	39	990	35	-52	nan	-4	nan	-6	nan	82	nan	30	nan	15	nan	3	nan	5.62113	0.0853123	-64	nan	335460315207059	nan
Z_91500_27	22575_TRA_Data	261	19/09/2015 (7)	20:03:13.850000	20.572	22575_TRA_Data, 8:03:11 PM (23.8 sec)	1.824	0.035	0.178	0.0028	0.26388			0.0744	0.0013	0.45916	0.0542	0.0021	9.35	0.33	1047	12	1056	15	1065	40	1017	36	-43	nan	-3	nan	-5	nan	79	nan	30	nan	15	nan	3	nan	5.61798	0.0883727	-23	nan	325228230524066	nan
Z_91500_28	22576_TRA_Data	262	19/09/2015 (7)	20:04:33.980000	23.054	22576_TRA_Data, 8:04:33 PM (24.2 sec)	1.822	0.035	0.1779	0.0028	0.27693			0.0745	0.0013	0.44438	0.0552	0.0021	9.4	0.33	1047	13	1054	15	1084	40	1006	37	-50	nan	-4	nan	-6	nan	80	nan	30	nan	15	nan	3	nan	5.62113	0.0884721	-17	nan	329690824034397	nan
Z_91500_29	22595_TRA_Data	281	19/09/2015 (7)	20:30:59.080000	25.755	22595_TRA_Data, 8:31:00 PM (25.6 sec)	1.836	0.034	0.1806	0.0028	0.32773			0.0738	0.0012	0.46245	0.0532	0.002	9.48	0.31	1051	12	1069	15	1045	38	977	35	-40	nan	-3	nan	-5	nan	81	nan	30	nan	15	nan	3	nan	5.5371	0.0858465	-47	nan	337830251829074	nan
Z_91500_30	22596_TRA_Data	282	19/09/2015 (7)	20:32:22.640000	26.038	22596_TRA_Data, 8:32:23 PM (26 sec)	1.86	0.034	0.1804	0.0028	0.30848			0.0748	0.0013	0.44861	0.0535	0.0019	9.35	0.3	1059	12	1067	15	1052	37	1002	36	-59	nan	-4	nan	-6	nan	79	nan	30	nan	15	nan	3	nan	5.54324	0.0860369	-10	nan	330417473339349	nan
Z_91500_31	22615_TRA_Data	301	19/09/2015 (7)	20:58:50.010000	25.669	22615_TRA_Data, 8:58:50 PM (25.6 sec)	1.867	0.034	0.1792	0.0026	0.10012			0.0754	0.0013	0.1532	0.0539	0.002	9.27	0.3	1061	12	1061	14	1057	38	1017	33	-42	nan	-3	nan	-5	nan	80	nan	30	nan	15	nan	3	nan	5.58036	0.080965	6	nan	332247546241238	nan
Z_91500_32	22616_TRA_Data	302	19/09/2015 (7)	21:00:12.520000	24.157	22616_TRA_Data, 9:00:13 PM (24.1 sec)	1.848	0.034	0.1786	0.0028	0.34739			0.075	0.0012	0.42782	0.0536	0.0019	9.3	0.31	1058	12	1058	15	1053	37	1023	34	-41	nan	-3	nan	-5	nan	80	nan	30	nan	15	nan	3	nan	5.5991	0.0877799	-4	nan	330237518525858	nan
Z_91500_33	22635_TRA_Data	321	19/09/2015 (7)	21:26:40.920000	24.762	22635_TRA_Data, 9:26:41 PM (24.7 sec)	1.848	0.033	0.18	0.0027	0.26804			0.0745	0.0013	0.4719	0.053	0.0019	9.47	0.32	1055	12	1066	15	1041	37	995	35	-47	nan	-4	nan	-5	nan	79	nan	30	nan	15	nan	3	nan	5.55556	0.0833333	-16	nan	330099590095818	nan
Z_91500_34	22636_TRA_Data	322	19/09/2015 (7)	21:28:04.190000	24.493	22636_TRA_Data, 9:28:04 PM (24.4 sec)	1.855	0.034	0.179	0.0027	0.070399			0.0752	0.0013	-0.028033	0.0533	0.002	9.37	0.31	1056	12	1061	15	1047	38	1009	35	-71	nan	-5	nan	-8	nan	81	nan	30	nan	15	nan	3	nan	5.58659	0.084267	-38	nan	334375114727831	nan
Z_91500_35	22655_TRA_Data	341	19/09/2015 (7)	21:54:31.760000	23.922	22655_TRA_Data, 9:54:32 PM (23.9 sec)	1.828	0.033	0.1787	0.0027	0.23101			0.074	0.0012	0.46687	0.053	0.002	9.48	0.32	1049	12	1058	15	1041	38	994	35	-72	nan	-5	nan	-8	nan	80	nan	30	nan	15	nan	3	nan	5.59597	0.0845502	-30	nan	332570277906415	nan
Z_91500_36	22656_TRA_Data	342	19/09/2015 (7)	21:55:54.750000	23.247	22656_TRA_Data, 9:55:54 PM (24.4 sec)	1.881	0.035	0.1791	0.0028	0.34124			0.0763	0.0013	0.39241	0.054	0.002	9.2	0.3	1067	12	1060	15	1063	38	1049	35	-88	nan	-7	nan	-10	nan	80	nan	30	nan	15	nan	3	nan	5.58347	0.0872905	-33	nan	329327905699118	nan
		#VALUE!		Sample B		7122/6-1 2067.75 m
SampleB_1	22461_TRA_Data	147	19/09/2015 (7)	17:24:41.630000	20.046	22461_TRA_Data, 5:24:38 PM (23.8 sec)	3.268	0.05	0.2269	0.0032	0.48821			0.1035	0.0012	0.43069	0.076	0.0023	3.437	0.087	1470	12	1317	17	1480	43	1670	22	-1390	nan	-154	nan	-401	nan	130	nan	112	nan	81	nan	1	nan	4.40723	0.0621557	19	nan	758094620714554	nan
SampleB_2	22462_TRA_Data	148	19/09/2015 (7)	17:26:03.740000	20.944	22462_TRA_Data, 5:26:00 PM (24.3 sec)	4.306	0.058	0.3021	0.004	0.59937			0.10214	0.00096	0.49346	0.0875	0.0026	6.35	0.15	1692	11	1700	20	1694	48	1655	17	697	nan	74	nan	109	nan	313	nan	165	nan	138	nan	2	nan	3.31016	0.0438287	-4	nan	2257929193241490	nan
SampleB_3	22463_TRA_Data	149	19/09/2015 (7)	17:27:24.920000	21.76	22463_TRA_Data, 5:27:22 PM (24.5 sec)	2.216	0.031	0.2017	0.0027	0.5114			0.07901	0.00084	0.45262	0.0584	0.0018	5.44	0.13	1183	10	1183	15	1147	34	1154	22	98	nan	7	nan	17	nan	256	nan	159	nan	88	nan	2	nan	4.95786	0.066367	-7	nan	1256238251374410	nan
SampleB_4	22464_TRA_Data	150	19/09/2015 (7)	17:28:44.380000	14.946	22464_TRA_Data, 5:28:44 PM (25.2 sec)	4.304	0.075	0.2956	0.0049	0.55117			0.1044	0.0011	0.38926	0.0848	0.003	5.17	0.13	1688	14	1666	24	1642	55	1688	21	-15	nan	-2	nan	-4	nan	108	nan	69	nan	56	nan	2	nan	3.38295	0.0560773	-1	nan	764377672055651	nan
SampleB_5	22465_TRA_Data	151	19/09/2015 (7)	17:30:06.420000	15.598	22465_TRA_Data, 5:30:07 PM (25 sec)	1.42	0.029	0.1423	0.0024	0.58585			0.0719	0.001	0.27895	0.0283	0.0014	8.49	0.3	892	12	857	14	563	27	952	28	-58	nan	-4	nan	-7	nan	234	nan	131	nan	35	nan	2	nan	7.02741	0.118523	-5	nan	773638940352794	nan
SampleB_6	22466_TRA_Data	152	19/09/2015 (7)	17:31:29.250000	14.501	22466_TRA_Data, 5:31:29 PM (25.4 sec)	4.55	0.063	0.3016	0.0043	0.69992			0.10811	0.00094	0.53559	0.0677	0.0023	26.06	0.63	1735	11	1697	21	1324	43	1763	16	-634	nan	-69	nan	-24	nan	514	nan	84	nan	54	nan	6	nan	3.31565	0.0472722	2	nan	3414302229934930	nan
SampleB_7	22467_TRA_Data	153	19/09/2015 (7)	17:32:58.040000	18.639	22467_TRA_Data, 5:32:51 PM (25.5 sec)	4.014	0.054	0.2836	0.0038	0.65217			0.10145	0.00092	0.44878	0.0804	0.0024	3.03	0.071	1633	11	1608	19	1563	45	1640	17	-577	nan	-60	nan	-191	nan	365	nan	414	nan	318	nan	1	nan	3.52609	0.0472467	1	nan	2771243884999210	nan
SampleB_8	22468_TRA_Data	154	19/09/2015 (7)	17:34:16.170000	23.507	22468_TRA_Data, 5:34:14 PM (25.9 sec)	2.611	0.034	0.2178	0.0027	0.53078			0.08599	0.00077	0.49855	0.0759	0.0023	10.05	0.24	1301.9	9.5	1269	15	1478	43	1329	17	-651	nan	-57	nan	-62	nan	477	nan	131	nan	96	nan	4	nan	4.59137	0.0569178	2	nan	2379424489233760	nan
SampleB_9	22469_TRA_Data	155	19/09/2015 (7)	17:35:42.490000	17.19	22469_TRA_Data, 5:35:36 PM (23.9 sec)	3.249	0.094	0.2191	0.004	0.76135			0.1048	0.0017	-0.16013	0.1057	0.0035	4.78	0.14	1453	20	1274	21	2028	63	1694	28	-226	nan	-24	nan	-49	nan	219	nan	93	nan	94	nan	2	nan	4.56413	0.083325	23	nan	1110266184597500	nan
SampleB_10	22470_TRA_Data	156	19/09/2015 (7)	17:36:57.760000	23.922	22470_TRA_Data, 5:36:58 PM (23.9 sec)	3.895	0.052	0.2831	0.0038	0.65618			0.09865	0.00086	0.51826	0.0819	0.0024	5.69	0.14	1610	11	1606	19	1589	45	1589	16	-2582	nan	-260	nan	-464	nan	931	nan	553	nan	435	nan	2	nan	3.53232	0.0474137	-2	nan	6353186559066480	nan
SampleB_11	22471_TRA_Data	157	19/09/2015 (7)	17:38:26.150000	18.535	22471_TRA_Data, 5:38:20 PM (24.7 sec)	4.679	0.061	0.3096	0.004	0.64302			0.10805	0.00088	0.53012	0.0964	0.0029	15.99	0.46	1761	11	1738	20	1859	53	1762	15	-2868	nan	-318	nan	-188	nan	625	nan	131	nan	122	nan	5	nan	3.22997	0.0417309	0	nan	4353635619988610	nan
SampleB_12	22472_TRA_Data	158	19/09/2015 (7)	17:39:43.190000	24.493	22472_TRA_Data, 5:39:43 PM (24.4 sec)	3.269	0.047	0.2526	0.0035	0.55044			0.09283	0.00099	0.46024	0.0764	0.0024	9.69	0.27	1469	11	1450	18	1489	45	1469	21	-935	nan	-88	nan	-93	nan	188	nan	63	nan	47	nan	3	nan	3.95883	0.0548531	-1	nan	1102558549312840	nan
SampleB_13	22473_TRA_Data	159	19/09/2015 (7)	17:41:05.830000	23.854	22473_TRA_Data, 5:41:06 PM (23.8 sec)	1.861	0.026	0.1753	0.0024	0.55309			0.07609	0.00077	0.44988	0.0553	0.0017	8.68	0.21	1064.2	9.4	1041	13	1088	32	1085	20	-3234	nan	-249	nan	-361	nan	430	nan	151	nan	81	nan	3	nan	5.70451	0.0780993	-2	nan	1742120329035100	nan
SampleB_14	22474_TRA_Data	160	19/09/2015 (7)	17:42:37.820000	14.859	22474_TRA_Data, 5:42:28 PM (24.3 sec)	3.388	0.049	0.2471	0.0037	0.77812			0.0979	0.0011	0.34153	0.0723	0.0021	3.551	0.087	1498	12	1421	20	1410	39	1577	19	-40368	nan	-3920	nan	-10677	nan	529	nan	501	nan	348	nan	1	nan	4.04695	0.0605977	9	nan	3399318298997060	nan
SampleB_15	22481_TRA_Data	167	19/09/2015 (7)	17:52:28.720000	23.955	22481_TRA_Data, 5:52:29 PM (23.9 sec)	0.916	0.02	0.0906	0.0014	0.26913			0.0726	0.0015	0.27438	0.0331	0.0011	4.21	0.12	653	11	558.7	8	658	22	926	43	248	nan	19	nan	58	nan	157	nan	103	nan	32	nan	2	nan	11.0375	0.170558	31	nan	348319562098168	nan
SampleB_16	22482_TRA_Data	168	19/09/2015 (7)	17:53:54.010000	20.669	22482_TRA_Data, 5:53:50 PM (24.5 sec)	5.08	0.11	0.3132	0.0042	0.42861			0.1165	0.0021	0.22856	0.0997	0.0037	2.996	0.074	1822	17	1754	21	1920	66	1874	29	1071	nan	112	nan	318	nan	216	nan	225	nan	216	nan	1	nan	3.19285	0.042816	4	nan	1776562542235830	nan
SampleB_17	22483_TRA_Data	169	19/09/2015 (7)	17:55:12.310000	16.523	22483_TRA_Data, 5:55:12 PM (25.3 sec)	3.552	0.051	0.2563	0.0035	0.44175			0.1001	0.0011	0.50095	0.0877	0.0026	4.77	0.12	1536	12	1468	18	1698	49	1606	22	539	nan	56	nan	108	nan	144	nan	85	nan	71	nan	2	nan	3.90168	0.0532808	6	nan	905461366916948	nan
SampleB_18	22484_TRA_Data	170	19/09/2015 (7)	17:56:39.310000	21.365	22484_TRA_Data, 5:56:35 PM (25.7 sec)	2.24	0.03	0.2046	0.0027	0.51927			0.07852	0.00077	0.4755	0.0593	0.0018	7.45	0.18	1190.4	9.5	1199	14	1165	34	1149	19	810	nan	66	nan	107	nan	307	nan	141	nan	79	nan	2	nan	4.88759	0.0644989	-8	nan	1487645046718300	nan
SampleB_19	22485_TRA_Data	171	19/09/2015 (7)	17:57:57.220000	14.848	22485_TRA_Data, 5:57:57 PM (24.4 sec)	2.989	0.042	0.2407	0.0034	0.52978			0.08973	0.00083	0.63031	0.0701	0.0021	6.53	0.17	1402	11	1388	18	1369	40	1404	18	2520	nan	232	nan	377	nan	1118	nan	571	nan	378	nan	2	nan	4.15455	0.0586849	-2	nan	6429968586701650	nan
SampleB_20	22486_TRA_Data	172	19/09/2015 (7)	17:59:19.720000	15.704	22486_TRA_Data, 5:59:20 PM (23.9 sec)	4.4	0.064	0.2878	0.0041	0.6228			0.10966	0.00093	0.54225	0.087	0.0028	11.57	0.27	1709	12	1628	20	1685	51	1787	16	3031	nan	344	nan	260	nan	979	nan	272	nan	223	nan	4	nan	3.47464	0.0494997	7	nan	6457323473601640	nan
SampleB_21	22487_TRA_Data	173	19/09/2015 (7)	18:00:47.620000	18.056	22487_TRA_Data, 6:00:42 PM (23.9 sec)	4.807	0.063	0.3171	0.0042	0.56886			0.10898	0.00097	0.54256	0.0903	0.0027	7.84	0.18	1784	11	1774	21	1747	50	1776	16	756	nan	84	nan	95	nan	394	nan	178	nan	150	nan	2	nan	3.15358	0.0417693	-1	nan	2915758511597190	nan
SampleB_22	22488_TRA_Data	174	19/09/2015 (7)	18:02:02.130000	21.987	22488_TRA_Data, 6:02:03 PM (24.1 sec)	4.026	0.064	0.2921	0.0043	0.43276			0.0995	0.0013	0.46212	0.0879	0.0028	4.43	0.45	1633	13	1648	21	1701	52	1587	25	132	nan	14	nan	35	nan	71	nan	56	nan	46	nan	1	nan	3.42348	0.0503971	-10	nan	510210397424824	nan
SampleB_23	22489_TRA_Data	175	19/09/2015 (7)	18:03:25.720000	24.963	22489_TRA_Data, 6:03:26 PM (24.9 sec)	4.452	0.067	0.3056	0.0043	0.52156			0.1046	0.0012	0.45568	0.0907	0.0027	4.29	0.1	1718	13	1717	21	1754	51	1694	21	396	nan	42	nan	88	nan	162	nan	127	nan	108	nan	1	nan	3.27225	0.0460428	-4	nan	1231070341247560	nan
SampleB_24	22490_TRA_Data	176	19/09/2015 (7)	18:04:53.160000	20.518	22490_TRA_Data, 6:04:48 PM (25.6 sec)	4.482	0.063	0.3139	0.0041	0.49217			0.1025	0.001	0.43345	0.0861	0.0026	4.79	0.15	1724	12	1758	20	1669	48	1656	19	287	nan	31	nan	60	nan	160	nan	123	nan	99	nan	1	nan	3.18573	0.0416103	-8	nan	1251684243639750	nan
SampleB_25	22491_TRA_Data	177	19/09/2015 (7)	18:06:09.680000	26.005	22491_TRA_Data, 6:06:10 PM (26 sec)	1.506	0.025	0.1549	0.0022	0.34026			0.0704	0.001	0.43004	0.047	0.0015	6.42	0.18	927.6	9.9	927	12	928	30	900	30	122	nan	9	nan	18	nan	139	nan	74	nan	32	nan	2	nan	6.45578	0.0916895	-37	nan	513162059169856	nan
SampleB_26	22492_TRA_Data	178	19/09/2015 (7)	18:07:43.050000	12.634	22492_TRA_Data, 6:07:32 PM (24.9 sec)	1.786	0.032	0.1744	0.0027	0.30991			0.074	0.0012	0.44285	0.051	0.0017	6.09	0.24	1034	12	1036	15	1004	33	995	34	72	nan	5	nan	12	nan	76	nan	46	nan	21	nan	2	nan	5.73395	0.0887709	-31	nan	321941438947635	nan
SampleB_27	22493_TRA_Data	179	19/09/2015 (7)	18:09:06.850000	12.835	22493_TRA_Data, 6:08:54 PM (25.6 sec)	4.835	0.096	0.2876	0.0044	0.56468			0.1201	0.0016	-0.082567	0.095	0.0026	1.773	0.067	1781	19	1626	22	1833	49	1937	25	718	nan	81	nan	388	nan	387	nan	678	nan	597	nan	1	nan	3.47705	0.0531955	14	nan	3277986089873950	nan
SampleB_28	22494_TRA_Data	180	19/09/2015 (7)	18:10:19.680000	21.998	22494_TRA_Data, 6:10:16 PM (25.4 sec)	1.574	0.033	0.0801	0.0014	0.14853			0.1437	0.0032	0.48681	0.02468	0.00074	0.634	0.018	947	13	496.3	8.5	493	15	2184	41	361	nan	43	nan	538	nan	5990	nan	31236	nan	7140	nan	0	nan	12.4844	0.218204	76	nan	2.23299e+16	nan
SampleB_29	22501_TRA_Data	187	19/09/2015 (7)	18:20:13.710000	21.99	22501_TRA_Data, 6:20:14 PM (25.9 sec)	3.888	0.05	0.2759	0.0035	0.55448			0.10186	0.00091	0.51276	0.086	0.0025	4.53	0.1	1608	10	1570	18	1667	47	1649	17	423	nan	44	nan	88	nan	416	nan	293	nan	232	nan	1	nan	3.6245	0.0459795	3	nan	2862521725106130	nan
SampleB_30	22502_TRA_Data	188	19/09/2015 (7)	18:21:40.790000	19.89	22502_TRA_Data, 6:21:41 PM (19.8 sec)	4.558	0.063	0.3056	0.0043	0.75052			0.10757	0.00091	0.48217	0.0919	0.0027	5.79	0.13	1738	11	1716	21	1776	50	1750	16	806	nan	89	nan	139	nan	799	nan	466	nan	392	nan	2	nan	3.27225	0.0460428	1	nan	5825908591466970	nan
SampleB_31	22503_TRA_Data	189	19/09/2015 (7)	18:22:59.150000	24.526	22503_TRA_Data, 6:22:59 PM (24.5 sec)	4.269	0.061	0.3001	0.0041	0.50896			0.1025	0.0011	0.46717	0.0924	0.0029	7.94	0.2	1684	12	1690	21	1786	54	1660	20	126	nan	14	nan	17	nan	187	nan	78	nan	66	nan	2	nan	3.33222	0.0455252	-4	nan	1296889840488730	nan
SampleB_32	22504_TRA_Data	190	19/09/2015 (7)	18:24:22.260000	24.058	22504_TRA_Data, 6:24:22 PM (24.6 sec)	2.992	0.047	0.2508	0.0036	0.49852			0.0858	0.001	0.38902	0.0756	0.0024	7.3	0.19	1400	12	1441	18	1471	45	1308	24	80	nan	7	nan	11	nan	130	nan	61	nan	42	nan	2	nan	3.98724	0.0572331	-15	nan	775921231172934	nan
SampleB_33	22505_TRA_Data	191	19/09/2015 (7)	18:25:58.670000	10.014	22505_TRA_Data, 6:25:43 PM (25.1 sec)	3.296	0.085	0.1577	0.0021	0.4748			0.1504	0.0033	0.085565	0.1808	0.0068	3.92	0.35	1471	23	943	12	3350	120	2325	44	239	nan	36	nan	65	nan	549	nan	132	nan	225	nan	4	nan	6.34115	0.0844415	59	nan	1941877446013930	nan
SampleB_34	22506_TRA_Data	192	19/09/2015 (7)	18:27:08.600000	23.079	22506_TRA_Data, 6:27:06 PM (25.5 sec)	4.077	0.059	0.2917	0.0043	0.79441			0.10094	0.0009	0.42904	0.0826	0.0025	17.88	0.62	1644	12	1646	21	1604	47	1633	16	532	nan	55	nan	28	nan	771	nan	145	nan	108	nan	5	nan	3.42818	0.0505354	-3	nan	4893359943943620	nan
SampleB_35	22507_TRA_Data	193	19/09/2015 (7)	18:28:27.980000	14.569	22507_TRA_Data, 6:28:28 PM (25.7 sec)	3.983	0.054	0.276	0.0037	0.5567			0.10393	0.0009	0.54104	0.082	0.0024	4.211	0.095	1629	11	1570	19	1591	45	1685	16	240	nan	26	nan	59	nan	492	nan	390	nan	292	nan	1	nan	3.62319	0.0485717	5	nan	3443581397972740	nan
SampleB_36	22508_TRA_Data	194	19/09/2015 (7)	18:29:59.520000	17.155	22508_TRA_Data, 6:29:51 PM (25.6 sec)	2.334	0.05	0.2094	0.0034	0.20022			0.0815	0.0017	0.47641	0.0613	0.0025	8.3	0.42	1210	15	1224	18	1201	47	1151	43	1	nan	0	nan	0	nan	37	nan	18	nan	10	nan	2	nan	4.77555	0.07754	-44	nan	183551222585134	nan
SampleB_37	22509_TRA_Data	195	19/09/2015 (7)	18:31:12.420000	24.258	22509_TRA_Data, 6:31:12 PM (24.2 sec)	2.819	0.039	0.2342	0.0031	0.52445			0.08692	0.00091	0.46104	0.0692	0.0021	7.85	0.2	1358	11	1355	16	1351	41	1343	20	21	nan	2	nan	3	nan	204	nan	90	nan	57	nan	2	nan	4.26985	0.0565182	-4	nan	1131452538707250	nan
SampleB_38	22510_TRA_Data	196	19/09/2015 (7)	18:32:46.900000	12.229	22510_TRA_Data, 6:32:35 PM (24.8 sec)	2.888	0.056	0.2028	0.0042	0.63162			0.10277	0.00098	0.50786	0.0351	0.0024	4.17	0.14	1377	13	1189	21	698	45	1665	18	155	nan	17	nan	39	nan	555	nan	798	nan	253	nan	1	nan	4.93097	0.102121	28	nan	3149700331107880	nan
SampleB_39	22511_TRA_Data	197	19/09/2015 (7)	18:33:57.460000	11.92	22511_TRA_Data, 6:33:57 PM (24.2 sec)	2.985	0.044	0.2295	0.0032	0.709			0.09357	0.00092	0.40002	0.0879	0.0026	3.484	0.083	1398	11	1331	17	1705	48	1484	19	12	nan	1	nan	4	nan	393	nan	288	nan	233	nan	1	nan	4.3573	0.0607554	7	nan	2246182008248900	nan
SampleB_40	22512_TRA_Data	198	19/09/2015 (7)	18:35:21.040000	25.635	22512_TRA_Data, 6:35:21 PM (25.6 sec)	1.824	0.031	0.1782	0.0026	0.43172			0.074	0.001	0.39515	0.0545	0.0017	3.12	0.09	1048	11	1055	14	1071	32	1000	29	11	nan	1	nan	4	nan	165	nan	159	nan	80	nan	1	nan	5.61167	0.0818762	-24	nan	752071950137233	nan
SampleB_41	22513_TRA_Data	199	19/09/2015 (7)	18:36:42.210000	24.607	22513_TRA_Data, 6:36:42 PM (25.4 sec)	4.441	0.057	0.3051	0.0039	0.65205			0.10472	0.00088	0.55972	0.0874	0.0025	6.02	0.14	1718	10	1717	19	1695	48	1699	15	109	nan	13	nan	19	nan	540	nan	313	nan	251	nan	2	nan	3.27761	0.0418967	-2	nan	3970842363708960	nan
SampleB_42	22514_TRA_Data	200	19/09/2015 (7)	18:38:04.610000	26.072	22514_TRA_Data, 6:38:05 PM (26 sec)	5.245	0.072	0.3343	0.0045	0.54809			0.1131	0.0011	0.47648	0.0978	0.0032	15.08	0.4	1856	12	1857	21	1883	58	1835	18	23	nan	2	nan	1	nan	172	nan	39	nan	35	nan	4	nan	2.99132	0.0402661	-3	nan	1238864786744730	nan
SampleB_43	22521_TRA_Data	207	19/09/2015 (7)	18:48:15.190000	14.488	22521_TRA_Data, 6:48:05 PM (25.1 sec)	1.746	0.035	0.1683	0.0027	0.28378			0.0755	0.0015	0.43006	0.0446	0.0015	3.174	0.093	1018	13	1001	15	880	29	1013	38	-18	nan	-1	nan	-6	nan	58	nan	74	nan	30	nan	1	nan	5.94177	0.0953225	-22	nan	267321173969369	nan
SampleB_44	22522_TRA_Data	208	19/09/2015 (7)	18:49:27.820000	12.154	22522_TRA_Data, 6:49:28 PM (24.8 sec)	2.511	0.034	0.2052	0.0027	0.5496			0.08843	0.00084	0.55156	0.0694	0.0021	6.28	0.16	1272	10	1201	14	1355	39	1376	19	88	nan	7	nan	13	nan	415	nan	191	nan	122	nan	2	nan	4.87329	0.0641223	10	nan	2017170718597660	nan
SampleB_45	22523_TRA_Data	209	19/09/2015 (7)	18:50:49.940000	14.775	22523_TRA_Data, 6:50:50 PM (25.7 sec)	2.9	0.043	0.229	0.0033	0.55849			0.09143	0.00089	0.50764	0.0819	0.0026	13.06	0.31	1380	11	1327	17	1589	48	1437	19	5	nan	0	nan	1	nan	345	nan	73	nan	55	nan	5	nan	4.36681	0.0629279	4	nan	1792892738217270	nan
SampleB_46	22524_TRA_Data	210	19/09/2015 (7)	18:52:15.440000	20.757	22524_TRA_Data, 6:52:13 PM (25.5 sec)	4.581	0.065	0.3046	0.0041	0.53401			0.1086	0.0011	0.38643	0.0919	0.0029	10.11	0.26	1742	12	1712	20	1775	54	1765	18	85	nan	9	nan	8	nan	219	nan	72	nan	61	nan	3	nan	3.28299	0.04419	2	nan	1521253593847290	nan
SampleB_47	22525_TRA_Data	211	19/09/2015 (7)	18:53:34.830000	23.854	22525_TRA_Data, 6:53:35 PM (23.8 sec)	3.881	0.052	0.2794	0.0036	0.53502			0.09996	0.00096	0.49262	0.0901	0.0028	11.12	0.28	1606	11	1587	18	1743	52	1611	18	-68	nan	-7	nan	-6	nan	310	nan	88	nan	74	nan	4	nan	3.5791	0.0461158	0	nan	1998910137421320	nan
SampleB_48	22526_TRA_Data	212	19/09/2015 (7)	18:54:57.990000	23.686	22526_TRA_Data, 6:54:58 PM (23.6 sec)	1.531	0.029	0.1582	0.0024	0.34711			0.0701	0.0012	0.40068	0.0471	0.0017	8.13	0.27	937	12	945	13	928	33	884	35	-8	nan	-1	nan	-2	nan	87	nan	39	nan	17	nan	2	nan	6.32111	0.0958955	-36	nan	324193657940869	nan
SampleB_49	22527_TRA_Data	213	19/09/2015 (7)	18:56:19.620000	24.056	22527_TRA_Data, 6:56:20 PM (24 sec)	4.164	0.058	0.2902	0.0039	0.43962			0.104	0.0012	0.52518	0.0909	0.0028	4.99	0.12	1664	12	1640	20	1756	52	1679	21	-74	nan	-8	nan	-15	nan	129	nan	83	nan	70	nan	2	nan	3.4459	0.0463095	0	nan	921742168960685	nan
SampleB_50	22528_TRA_Data	214	19/09/2015 (7)	18:57:43.030000	23.653	22528_TRA_Data, 6:57:43 PM (23.6 sec)	3.993	0.066	0.2839	0.0042	0.48508			0.1023	0.0014	0.38066	0.0837	0.0027	4.34	0.12	1627	14	1608	21	1625	50	1637	25	-19	nan	-2	nan	-4	nan	70	nan	56	nan	44	nan	1	nan	3.52237	0.0521097	-2	nan	500055759230935	nan
SampleB_51	22529_TRA_Data	215	19/09/2015 (7)	18:59:06.160000	18.819	22529_TRA_Data, 6:59:06 PM (24.1 sec)	2.804	0.043	0.224	0.0033	0.42689			0.0907	0.0012	0.51537	0.0735	0.0023	4.57	0.13	1351	12	1300	17	1432	44	1417	25	-23	nan	-2	nan	-4	nan	101	nan	75	nan	50	nan	2	nan	4.46429	0.0657685	1	nan	567422138513584	nan
SampleB_52	22530_TRA_Data	216	19/09/2015 (7)	19:00:27.920000	19.036	22530_TRA_Data, 7:00:28 PM (24.7 sec)	2.137	0.036	0.1855	0.0028	0.71645			0.08329	0.00085	0.31911	0.0628	0.002	7.8	0.19	1156	11	1095	15	1230	38	1264	19	-26	nan	-2	nan	-3	nan	578	nan	211	nan	122	nan	3	nan	5.39084	0.0813711	11	nan	2432291226191330	nan
SampleB_53	22531_TRA_Data	217	19/09/2015 (7)	19:01:50.190000	24.493	22531_TRA_Data, 7:01:50 PM (24.4 sec)	14.37	0.19	0.5381	0.0075	0.58057			0.193	0.0019	0.55274	0.1473	0.0044	2.656	0.069	2769	13	2771	31	2777	77	2759	16	30	nan	6	nan	8	nan	94	nan	126	nan	172	nan	1	nan	1.85839	0.0259021	-1	nan	1473553790972170	nan
SampleB_54	22532_TRA_Data	218	19/09/2015 (7)	19:03:15.050000	21.629	22532_TRA_Data, 7:03:12 PM (24.3 sec)	3.773	0.056	0.2804	0.0039	0.47087			0.0975	0.0011	0.44326	0.0802	0.0025	4.94	0.12	1583	12	1591	20	1558	47	1559	22	-19	nan	-2	nan	-5	nan	131	nan	94	nan	70	nan	1	nan	3.56633	0.0496031	-5	nan	917421899918969	nan
SampleB_55	22533_TRA_Data	219	19/09/2015 (7)	19:04:34.620000	14.866	22533_TRA_Data, 7:04:35 PM (24 sec)	3.965	0.079	0.271	0.0038	0.41788			0.1065	0.0018	0.38996	0.0884	0.0033	4.48	0.12	1624	16	1543	19	1710	59	1720	29	-21	nan	-2	nan	-5	nan	141	nan	96	nan	79	nan	1	nan	3.69004	0.0517422	8	nan	945030660087002	nan
SampleB_56	22534_TRA_Data	220	19/09/2015 (7)	19:05:57.190000	24.493	22534_TRA_Data, 7:05:57 PM (24.4 sec)	1.69	0.024	0.1692	0.0023	0.48029			0.07221	0.00078	0.48163	0.0517	0.0016	5.97	0.15	1002.4	9	1007	12	1018	30	973	22	-20	nan	-2	nan	-3	nan	309	nan	170	nan	82	nan	2	nan	5.91017	0.0803391	-14	nan	1255498412612960	nan
SampleB_57	22541_TRA_Data	227	19/09/2015 (7)	19:15:58.690000	23.989	22541_TRA_Data, 7:15:59 PM (23.9 sec)	3.043	0.065	0.2459	0.0042	0.24807			0.0911	0.0019	0.44137	0.0753	0.0031	7.64	0.32	1406	17	1414	22	1463	57	1372	41	-15	nan	-1	nan	-2	nan	29	nan	14	nan	10	nan	2	nan	4.06669	0.0694596	7	nan	166389524952157	nan
SampleB_58	22542_TRA_Data	228	19/09/2015 (7)	19:17:20.520000	24.157	22542_TRA_Data, 7:17:21 PM (24.1 sec)	10.38	0.15	0.4683	0.0067	0.48326			0.1603	0.0019	0.4848	0.1312	0.004	2.519	0.062	2463	14	2471	30	2490	72	2443	20	-51	nan	-8	nan	-19	nan	47	nan	66	nan	81	nan	1	nan	2.13538	0.0305511	-2	nan	617822920590270	nan
SampleB_59	22543_TRA_Data	229	19/09/2015 (7)	19:18:42.750000	24.93	22543_TRA_Data, 7:18:43 PM (24.9 sec)	4.291	0.057	0.2984	0.004	0.57971			0.1039	0.001	0.57015	0.0875	0.0026	5.97	0.14	1688	11	1680	20	1694	49	1683	18	-124	nan	-14	nan	-20	nan	244	nan	138	nan	113	nan	2	nan	3.35121	0.0449223	-2	nan	1746018388069330	nan
SampleB_60	22544_TRA_Data	230	19/09/2015 (7)	19:20:03.600000	26.085	22544_TRA_Data, 7:20:05 PM (24.8 sec)	2.424	0.039	0.2156	0.0031	0.42072			0.0813	0.0011	0.42509	0.0681	0.0021	5.09	0.14	1245	12	1256	16	1331	41	1201	27	-52	nan	-5	nan	-10	nan	106	nan	69	nan	43	nan	2	nan	4.63822	0.0666905	-15	nan	567486534349564	nan
SampleB_61	22545_TRA_Data	231	19/09/2015 (7)	19:21:31.230000	17.169	22545_TRA_Data, 7:21:27 PM (25.2 sec)	2.269	0.053	0.1837	0.0039	0.62727			0.0893	0.0014	0.22127	0.066	0.0021	4.87	0.14	1188	17	1083	21	1291	40	1364	32	-76	nan	-6	nan	-15	nan	145	nan	83	nan	50	nan	2	nan	5.44366	0.11557	8	nan	618353542172971	nan
SampleB_62	22546_TRA_Data	232	19/09/2015 (7)	19:22:47.730000	23.635	22546_TRA_Data, 7:22:49 PM (25.9 sec)	3.353	0.046	0.2617	0.0035	0.5023			0.09241	0.00095	0.53455	0.0778	0.0023	6.64	0.17	1490	11	1496	18	1512	44	1462	20	-133	nan	-13	nan	-19	nan	201	nan	101	nan	73	nan	2	nan	3.82117	0.0511047	-6	nan	1262422428943550	nan
SampleB_63	22547_TRA_Data	233	19/09/2015 (7)	19:24:11.990000	21.671	22547_TRA_Data, 7:24:12 PM (23.6 sec)	4.086	0.073	0.2934	0.0046	0.36001			0.1007	0.0016	0.46089	0.0887	0.0029	2.86	0.077	1641	15	1655	23	1715	53	1599	30	-35	nan	-4	nan	-12	nan	46	nan	54	nan	44	nan	1	nan	3.40832	0.0534365	-11	nan	352819363666062	nan
SampleB_64	22548_TRA_Data	234	19/09/2015 (7)	19:25:33.390000	15.655	22548_TRA_Data, 7:25:33 PM (24.2 sec)	3.37	0.052	0.2386	0.0037	0.7203			0.10184	0.00087	0.46347	0.0483	0.0016	6.95	0.16	1494	12	1378	19	952	31	1647	16	-200	nan	-21	nan	-30	nan	487	nan	345	nan	153	nan	1	nan	4.19111	0.0649921	15	nan	2900947784914070	nan
SampleB_65	22549_TRA_Data	235	19/09/2015 (7)	19:26:56.720000	23.955	22549_TRA_Data, 7:26:57 PM (23.9 sec)	2.095	0.032	0.1963	0.0027	0.46784			0.07706	0.0009	0.42668	0.0583	0.0019	9.06	0.24	1145	10	1155	15	1144	36	1104	24	-92	nan	-7	nan	-10	nan	199	nan	75	nan	40	nan	3	nan	5.09424	0.0700686	-14	nan	908407831866365	nan
SampleB_66	22550_TRA_Data	236	19/09/2015 (7)	19:28:18.490000	24.19	22550_TRA_Data, 7:28:18 PM (24.1 sec)	2.068	0.029	0.1912	0.0027	0.72637			0.07797	0.00069	0.47253	0.0553	0.0017	5.34	0.12	1135.2	9.6	1127	15	1088	32	1139	18	-456	nan	-38	nan	-89	nan	894	nan	579	nan	295	nan	2	nan	5.23013	0.0738564	-3	nan	4162083011807000	nan
SampleB_67	22551_TRA_Data	237	19/09/2015 (7)	19:29:41.030000	23.653	22551_TRA_Data, 7:29:41 PM (23.6 sec)	1.771	0.026	0.1742	0.0024	0.51707			0.07359	0.00081	0.47271	0.0632	0.0023	30.9	1.1	1032	9.4	1034	13	1236	44	1014	22	-223	nan	-16	nan	-8	nan	316	nan	33	nan	19	nan	11	nan	5.74053	0.0790888	-12	nan	1204308348165450	nan
SampleB_68	22552_TRA_Data	238	19/09/2015 (7)	19:31:03.860000	23.821	22552_TRA_Data, 7:31:04 PM (23.8 sec)	3.343	0.055	0.2626	0.004	0.0078236			0.0925	0.0013	0.10438	0.077	0.0029	12.14	0.41	1483	13	1501	20	1494	54	1439	28	-54	nan	-5	nan	-5	nan	67	nan	20	nan	14	nan	3	nan	3.80807	0.0580057	-13	nan	406127450823789	nan
SampleB_69	22553_TRA_Data	239	19/09/2015 (7)	19:32:25.040000	17.261	22553_TRA_Data, 7:32:26 PM (24.1 sec)	3.97	0.056	0.2888	0.0041	0.61109			0.09956	0.00099	0.53455	0.0851	0.0026	4.58	0.11	1625	12	1632	20	1649	47	1603	18	-162	nan	-17	nan	-34	nan	221	nan	161	nan	127	nan	1	nan	3.4626	0.0491575	-4	nan	1570357628542620	nan
SampleB_70	22554_TRA_Data	240	19/09/2015 (7)	19:34:00.260000	11.942	22554_TRA_Data, 7:33:48 PM (24.2 sec)	1.959	0.025	0.1938	0.0025	0.6327			0.07309	0.00065	0.51094	0.0449	0.0018	390	18	1100.5	8.9	1141	14	883	35	1006	18	-679	nan	-51	nan	-2	nan	1183	nan	17	nan	7	nan	71	nan	5.15996	0.0665629	-18	nan	4924071975942420	nan
SampleB_71	22561_TRA_Data	247	19/09/2015 (7)	19:43:49.680000	24.997	22561_TRA_Data, 7:43:50 PM (24.9 sec)	1.957	0.036	0.1905	0.003	0.282			0.0748	0.0013	0.46508	0.0591	0.0019	3.75	0.1	1093	12	1123	16	1160	37	1009	36	-40	nan	-3	nan	-11	nan	88	nan	78	nan	43	nan	1	nan	5.24934	0.0826668	-35	nan	433959144884914	nan
SampleB_72	22562_TRA_Data	248	19/09/2015 (7)	19:45:11.780000	20.11	22562_TRA_Data, 7:45:11 PM (25.2 sec)	3.177	0.043	0.2539	0.0033	0.60281			0.09024	0.0008	0.44298	0.0771	0.0023	5.66	0.13	1449	10	1457	17	1499	43	1419	17	-211	nan	-20	nan	-37	nan	536	nan	306	nan	217	nan	2	nan	3.93856	0.0511904	-5	nan	3307373281958230	nan
SampleB_73	22563_TRA_Data	249	19/09/2015 (7)	19:46:44.310000	15.375	22563_TRA_Data, 7:46:34 PM (25.5 sec)	4.266	0.054	0.3045	0.004	0.45454			0.10113	0.0009	0.58222	0.0873	0.0026	5.75	0.13	1685	11	1712	20	1692	48	1637	16	-214	nan	-24	nan	-42	nan	515	nan	315	nan	254	nan	2	nan	3.28407	0.0431405	-6	nan	3829347159087680	nan
SampleB_74	22564_TRA_Data	250	19/09/2015 (7)	19:47:58.160000	20.748	22564_TRA_Data, 7:47:57 PM (24.4 sec)	1.955	0.028	0.1838	0.0026	0.59411			0.07673	0.00072	0.37554	0.0565	0.0017	4.66	0.11	1096.4	9.2	1087	14	1110	32	1102	19	-279	nan	-23	nan	-60	nan	746	nan	510	nan	265	nan	1	nan	5.4407	0.0769631	-2	nan	3369888729940790	nan
SampleB_75	22565_TRA_Data	251	19/09/2015 (7)	19:49:19.950000	20.332	22565_TRA_Data, 7:49:20 PM (24.7 sec)	3.157	0.048	0.2338	0.0033	0.49433			0.0975	0.0012	0.46871	0.0689	0.0023	7.95	0.22	1440	12	1353	17	1346	43	1556	23	-72	nan	-7	nan	-10	nan	126	nan	55	nan	35	nan	2	nan	4.27716	0.0603705	10	nan	699678437891252	nan
SampleB_76	22566_TRA_Data	252	19/09/2015 (7)	19:50:50.990000	15.683	22566_TRA_Data, 7:50:42 PM (24.9 sec)	13.8	0.18	0.5176	0.0071	0.55995			0.1926	0.0019	0.55186	0.1454	0.0044	3.842	0.098	2731	13	2684	30	2742	77	2755	16	-97	nan	-19	nan	-23	nan	101	nan	95	nan	127	nan	1	nan	1.93199	0.0265015	2	nan	1495014209626090	nan
SampleB_77	22567_TRA_Data	253	19/09/2015 (7)	19:52:06.930000	21.754	22567_TRA_Data, 7:52:04 PM (24.6 sec)	2.821	0.042	0.2334	0.0032	0.38727			0.0878	0.0011	0.48189	0.0706	0.0022	5.04	0.13	1357	11	1350	17	1377	42	1357	24	-98	nan	-9	nan	-19	nan	136	nan	90	nan	59	nan	2	nan	4.28449	0.0587419	-5	nan	784759488909077	nan
SampleB_78	22568_TRA_Data	254	19/09/2015 (7)	19:53:29.610000	22.073	22568_TRA_Data, 7:53:26 PM (25.4 sec)	2.352	0.034	0.2065	0.0028	0.48301			0.08231	0.0009	0.45666	0.0693	0.0023	9.72	0.25	1225	10	1209	15	1353	43	1237	22	-177	nan	-15	nan	-18	nan	269	nan	84	nan	53	nan	3	nan	4.84262	0.0656626	-2	nan	1278699856342810	nan
SampleB_79	22569_TRA_Data	255	19/09/2015 (7)	19:54:48.380000	25.299	22569_TRA_Data, 7:54:48 PM (25.2 sec)	4.565	0.061	0.3115	0.0042	0.62832			0.10577	0.00097	0.55816	0.0905	0.0027	5.38	0.14	1739	11	1746	21	1750	50	1717	17	-311	nan	-34	nan	-56	nan	257	nan	166	nan	138	nan	2	nan	3.21027	0.0432846	-4	nan	1923082800739100	nan
SampleB_80	22570_TRA_Data	256	19/09/2015 (7)	19:56:10.960000	18.483	22570_TRA_Data, 7:56:11 PM (23.7 sec)	3.163	0.045	0.2407	0.0034	0.62574			0.09485	0.0009	0.484	0.0806	0.0024	5.79	0.15	1445	11	1389	18	1566	45	1514	18	-677	nan	-67	nan	-114	nan	944	nan	490	nan	357	nan	2	nan	4.15455	0.0586849	6	nan	5454075688525560	nan
SampleB_81	22571_TRA_Data	257	19/09/2015 (7)	19:57:32.220000	24.459	22571_TRA_Data, 7:57:32 PM (24.4 sec)	4.204	0.061	0.3009	0.0042	0.58007			0.1009	0.001	0.45785	0.0888	0.0027	2.348	0.056	1670	12	1693	21	1719	49	1626	20	-283	nan	-29	nan	-121	nan	209	nan	301	nan	246	nan	1	nan	3.32336	0.0463879	-7	nan	1737063175909300	nan
SampleB_82	22572_TRA_Data	258	19/09/2015 (7)	19:58:59.740000	19.938	22572_TRA_Data, 7:58:56 PM (24.1 sec)	2.263	0.031	0.2049	0.0027	0.50961			0.07988	0.0008	0.46487	0.0614	0.0019	7.39	0.18	1199.6	9.8	1201	14	1203	36	1182	20	-262	nan	-22	nan	-35	nan	384	nan	176	nan	99	nan	2	nan	4.88043	0.0643102	-5	nan	1860816718755230	nan
SampleB_83	22573_TRA_Data	259	19/09/2015 (7)	20:00:19.910000	21.774	22573_TRA_Data, 8:00:17 PM (24.4 sec)	1.955	0.033	0.1892	0.0029	0.48684			0.0751	0.001	0.41095	0.0556	0.0018	6.88	0.19	1096	11	1115	15	1092	35	1037	28	-68	nan	-5	nan	-10	nan	150	nan	75	nan	38	nan	2	nan	5.28541	0.0810132	-41	nan	670724086523048	nan
SampleB_84	22574_TRA_Data	260	19/09/2015 (7)	20:01:44.690000	19.989	22574_TRA_Data, 8:01:39 PM (25.4 sec)	4.086	0.089	0.25	0.0034	0.28953			0.1173	0.0023	0.11345	0.0944	0.0029	2.279	0.065	1627	18	1437	18	1820	54	1842	35	-2	nan	5	nan	14	nan	292	nan	352	nan	297	nan	1	nan	4	0.0544	17	nan	1994273675449560	nan
SampleB_85	22581_TRA_Data	267	19/09/2015 (7)	20:11:39.090000	24.594	22581_TRA_Data, 8:11:39 PM (24.5 sec)	3.32	0.044	0.2588	0.0034	0.60892			0.09245	0.00085	0.49372	0.0753	0.0022	5.96	0.14	1484	10	1482	17	1466	42	1468	18	-435	nan	-42	nan	-71	nan	442	nan	255	nan	177	nan	2	nan	3.86399	0.0507634	-3	nan	2786877322560920	nan
SampleB_86	22582_TRA_Data	268	19/09/2015 (7)	20:13:02.240000	21.394	22582_TRA_Data, 8:13:02 PM (24.9 sec)	2.308	0.038	0.211	0.0031	0.3697			0.0791	0.0011	0.45837	0.0655	0.002	3.453	0.099	1211	11	1232	16	1282	39	1144	28	-93	nan	-8	nan	-27	nan	124	nan	121	nan	73	nan	1	nan	4.73934	0.0696301	-21	nan	679456857647016	nan
SampleB_87	22583_TRA_Data	269	19/09/2015 (7)	20:14:23.620000	21.851	22583_TRA_Data, 8:14:24 PM (24 sec)	3.336	0.045	0.2589	0.0034	0.53289			0.09303	0.00094	0.49332	0.0762	0.0023	3.262	0.087	1486	11	1483	17	1484	43	1476	19	-232	nan	-21	nan	-70	nan	247	nan	264	nan	186	nan	1	nan	3.8625	0.0507242	-3	nan	1693221823348480	nan
SampleB_88	22584_TRA_Data	270	19/09/2015 (7)	20:15:44.420000	12.69	22584_TRA_Data, 8:15:46 PM (23.9 sec)	1.851	0.048	0.1806	0.0038	0.68462			0.07398	0.00094	0.36339	0.0539	0.0017	8.32	0.26	1059	15	1070	20	1060	33	1014	24	-361	nan	-27	nan	-39	nan	699	nan	250	nan	125	nan	3	nan	5.5371	0.116506	-22	nan	2869569778919410	nan
SampleB_89	22585_TRA_Data	271	19/09/2015 (7)	20:17:11.380000	17.288	22585_TRA_Data, 8:17:08 PM (24.9 sec)	3.312	0.045	0.254	0.0034	0.4719			0.09374	0.00091	0.53488	0.067	0.0021	7.56	0.18	1481	11	1458	17	1309	39	1495	19	-255	nan	-24	nan	-30	nan	315	nan	156	nan	97	nan	2	nan	3.93701	0.0527001	0	nan	1917265427300350	nan
SampleB_90	22586_TRA_Data	272	19/09/2015 (7)	20:18:39.140000	15.541	22586_TRA_Data, 8:18:30 PM (24.9 sec)	1.651	0.024	0.1627	0.0022	0.54334			0.07289	0.00078	0.41497	0.0492	0.0015	4.67	0.11	988.6	8.9	971	12	970	29	998	21	-261	nan	-19	nan	-52	nan	781	nan	556	nan	254	nan	1	nan	6.14628	0.0831089	-1	nan	3150094776099570	nan
SampleB_91	22587_TRA_Data	273	19/09/2015 (7)	20:19:55.080000	22.597	22587_TRA_Data, 8:19:53 PM (24.7 sec)	4.044	0.058	0.2915	0.004	0.41624			0.1	0.0011	0.51327	0.0837	0.0028	5.97	0.16	1641	12	1649	20	1623	52	1607	22	-107	nan	-11	nan	-17	nan	129	nan	78	nan	60	nan	2	nan	3.43053	0.0470742	-6	nan	917067799314262	nan
SampleB_92	22588_TRA_Data	274	19/09/2015 (7)	20:21:14.780000	24.896	22588_TRA_Data, 8:21:15 PM (24.8 sec)	3.694	0.049	0.2679	0.0034	0.46643			0.09943	0.00097	0.50699	0.08	0.0024	4.82	0.11	1566	11	1529	18	1555	44	1602	18	-304	nan	-31	nan	-61	nan	423	nan	288	nan	216	nan	1	nan	3.73274	0.0473733	3	nan	2810817879957070	nan
SampleB_93	22589_TRA_Data	275	19/09/2015 (7)	20:22:37.680000	24.997	22589_TRA_Data, 8:22:38 PM (24.9 sec)	1.923	0.029	0.1825	0.0025	0.35911			0.07596	0.00086	0.25626	0.0576	0.0017	5.44	0.13	1084	10	1079	13	1132	33	1071	23	-225	nan	-18	nan	-42	nan	347	nan	202	nan	108	nan	2	nan	5.47945	0.075061	-9	nan	1519464153409330	nan
SampleB_94	22590_TRA_Data	276	19/09/2015 (7)	20:23:59.550000	25.134	22590_TRA_Data, 8:23:59 PM (25.6 sec)	3.66	0.05	0.2773	0.0037	0.54411			0.09503	0.00096	0.4828	0.0801	0.0024	7.52	0.19	1558	11	1577	19	1556	45	1517	19	-256	nan	-25	nan	-33	nan	298	nan	130	nan	97	nan	2	nan	3.6062	0.0481174	-7	nan	1922046923647950	nan
SampleB_95	22591_TRA_Data	277	19/09/2015 (7)	20:25:22.110000	23.114	22591_TRA_Data, 8:25:22 PM (25.5 sec)	2.111	0.03	0.1958	0.0027	0.44288			0.07774	0.00084	0.48968	0.0592	0.0019	10.69	0.28	1149.5	9.9	1151	14	1162	36	1126	22	-191	nan	-15	nan	-18	nan	271	nan	83	nan	46	nan	3	nan	5.10725	0.0704269	-12	nan	1214143313752400	nan
SampleB_96	22592_TRA_Data	278	19/09/2015 (7)	20:26:44.130000	14.624	22592_TRA_Data, 8:26:44 PM (23.5 sec)	2.815	0.039	0.2159	0.0031	0.63145			0.09403	0.00083	0.58809	0.063	0.0019	11.71	0.27	1357	10	1260	16	1234	36	1498	17	-572	nan	-55	nan	-48	nan	1076	nan	304	nan	180	nan	4	nan	4.63177	0.0665053	14	nan	5303425058431180	nan
SampleB_97	22593_TRA_Data	279	19/09/2015 (7)	20:28:06.710000	25.971	22593_TRA_Data, 8:28:07 PM (25.9 sec)	4.283	0.074	0.2984	0.0045	0.39795			0.1037	0.0015	0.43172	0.0912	0.0029	3.116	0.082	1680	14	1679	22	1761	53	1660	28	-62	nan	-7	nan	-19	nan	53	nan	55	nan	47	nan	1	nan	3.35121	0.0505376	-9	nan	402739363075413	nan
SampleB_98	22594_TRA_Data	280	19/09/2015 (7)	20:29:30.540000	22.137	22594_TRA_Data, 8:29:29 PM (24 sec)	1.95	0.027	0.1822	0.0025	0.47496			0.07708	0.00082	0.54145	0.0542	0.0017	7.42	0.18	1096.2	9.2	1079	14	1067	32	1108	22	-283	nan	-22	nan	-35	nan	463	nan	207	nan	106	nan	2	nan	5.48847	0.0753084	-3	nan	1989940058480160	nan
SampleB_99	22601_TRA_Data	287	19/09/2015 (7)	20:39:29.150000	14.749	22601_TRA_Data, 8:39:29 PM (24.5 sec)	3.132	0.043	0.2401	0.0031	0.46718			0.09429	0.00098	0.5621	0.0721	0.0022	1.56	0.054	1438	11	1385	17	1406	41	1498	21	-259	nan	-25	nan	-161	nan	285	nan	584	nan	398	nan	0	nan	4.16493	0.0537746	5	nan	2128723473120220	nan
SampleB_100	22602_TRA_Data	288	19/09/2015 (7)	20:40:51.820000	24.862	22602_TRA_Data, 8:40:52 PM (24.8 sec)	2.902	0.04	0.2395	0.0031	0.53804			0.0872	0.00087	0.43397	0.0704	0.0022	8.72	0.21	1380	11	1382	16	1375	41	1351	19	-264	nan	-23	nan	-29	nan	318	nan	122	nan	81	nan	3	nan	4.17537	0.0540444	-5	nan	1790385650971740	nan
SampleB_101	22603_TRA_Data	289	19/09/2015 (7)	20:42:20.460000	19.217	22603_TRA_Data, 8:42:14 PM (25.3 sec)	2.077	0.039	0.1996	0.003	0.28342			0.0751	0.0013	0.41055	0.0529	0.0018	3.67	0.1	1135	13	1172	16	1044	34	1027	36	-42	nan	-3	nan	-10	nan	63	nan	66	nan	33	nan	1	nan	5.01002	0.0753009	-34	nan	333109565459368	nan
SampleB_102	22604_TRA_Data	290	19/09/2015 (7)	20:43:40.140000	19.538	22604_TRA_Data, 8:43:35 PM (24.3 sec)	1.926	0.026	0.1802	0.0024	0.46372			0.07682	0.00074	0.49969	0.0507	0.0015	3.403	0.079	1088.6	8.9	1067	13	999	29	1107	19	-424	nan	-34	nan	-121	nan	549	nan	564	nan	270	nan	1	nan	5.54939	0.0739097	-1	nan	2599515792880840	nan
SampleB_103	22605_TRA_Data	291	19/09/2015 (7)	20:44:57.850000	17.749	22605_TRA_Data, 8:44:58 PM (24.8 sec)	3.344	0.046	0.2495	0.0033	0.56528			0.09624	0.00096	0.49647	0.0813	0.0024	5.33	0.14	1488	11	1436	17	1578	46	1539	19	-136	nan	-13	nan	-26	nan	298	nan	165	nan	127	nan	2	nan	4.00802	0.0530118	4	nan	1791619320025670	nan
SampleB_104	22606_TRA_Data	292	19/09/2015 (7)	20:46:20.870000	23.81	22606_TRA_Data, 8:46:19 PM (25.4 sec)	3.948	0.053	0.2829	0.0037	0.53653			0.10034	0.00097	0.5087	0.08	0.0024	4.244	0.099	1621	11	1605	19	1554	44	1622	18	-173	nan	-17	nan	-38	nan	288	nan	234	nan	177	nan	1	nan	3.53482	0.0462313	-1	nan	2078037167365560	nan
SampleB_105	22607_TRA_Data	293	19/09/2015 (7)	20:47:41.480000	23.391	22607_TRA_Data, 8:47:41 PM (25.1 sec)	5.08	0.068	0.3305	0.0045	0.61683			0.1105	0.0011	0.57374	0.1003	0.0032	13.73	0.35	1829	11	1839	22	1932	58	1795	17	-194	nan	-22	nan	-14	nan	237	nan	56	nan	53	nan	4	nan	3.02572	0.0411974	-4	nan	1701077325565940	nan
SampleB_106	22608_TRA_Data	294	19/09/2015 (7)	20:49:03.520000	25.165	22608_TRA_Data, 8:49:04 PM (25.1 sec)	6.067	0.081	0.3589	0.0046	0.5733			0.1214	0.0011	0.47096	0.0993	0.003	4.49	0.12	1981	12	1975	22	1913	55	1967	16	-232	nan	-29	nan	-51	nan	236	nan	187	nan	175	nan	1	nan	2.78629	0.0357117	-1	nan	2043755441489010	nan
SampleB_107	22609_TRA_Data	295	19/09/2015 (7)	20:50:26.250000	25.434	22609_TRA_Data, 8:50:26 PM (25.4 sec)	2.399	0.04	0.2143	0.0031	0.37912			0.0808	0.0012	0.45426	0.0625	0.0019	3.235	0.082	1235	12	1250	17	1225	37	1182	29	-58	nan	-5	nan	-17	nan	95	nan	99	nan	58	nan	1	nan	4.66636	0.0675021	-29	nan	534653061009533	nan
SampleB_108	22610_TRA_Data	296	19/09/2015 (7)	20:51:49.080000	25.602	22610_TRA_Data, 8:51:49 PM (25.6 sec)	3.531	0.047	0.2671	0.0035	0.60211			0.09495	0.00087	0.51034	0.0748	0.0022	4.93	0.12	1531	11	1525	18	1458	42	1519	18	-351	nan	-34	nan	-70	nan	329	nan	237	nan	165	nan	1	nan	3.74392	0.0490592	-2	nan	2195715504355280	nan
SampleB_109	22611_TRA_Data	297	19/09/2015 (7)	20:53:11.560000	24.123	22611_TRA_Data, 8:53:12 PM (24.1 sec)	3.442	0.055	0.2663	0.0039	0.34777			0.0934	0.0013	0.49504	0.0779	0.0025	4.19	0.11	1508	13	1519	20	1514	46	1472	27	-86	nan	-8	nan	-20	nan	87	nan	70	nan	51	nan	1	nan	3.75516	0.0549949	-10	nan	585646570773276	nan
SampleB_110	22612_TRA_Data	298	19/09/2015 (7)	20:54:33.690000	23.989	22612_TRA_Data, 8:54:34 PM (23.9 sec)	1.778	0.024	0.1744	0.0023	0.60056			0.0732	0.00066	0.48395	0.0511	0.0015	4.5	0.1	1035.2	8.7	1036	12	1008	29	1008	18	-629	nan	-47	nan	-134	nan	1131	nan	838	nan	405	nan	1	nan	5.73395	0.0756197	-7	nan	4929818144606170	nan
SampleB_111	22613_TRA_Data	299	19/09/2015 (7)	20:55:55.860000	23.821	22613_TRA_Data, 8:55:56 PM (23.8 sec)	1.695	0.023	0.1692	0.0023	0.68759			0.07198	0.00064	0.4557	0.0512	0.0015	12.92	0.31	1004.5	8.8	1007	13	1009	30	973	18	-533	nan	-39	nan	-39	nan	1000	nan	249	nan	120	nan	4	nan	5.91017	0.0803391	-8	nan	3806905765370540	nan
SampleB_112	22614_TRA_Data	300	19/09/2015 (7)	20:57:17.830000	23.854	22614_TRA_Data, 8:57:18 PM (23.8 sec)	4.226	0.065	0.2954	0.0041	0.1091			0.1032	0.0013	0.1678	0.0857	0.0027	4.46	0.11	1671	13	1666	20	1661	50	1652	24	-76	nan	-8	nan	-16	nan	92	nan	71	nan	57	nan	1	nan	3.38524	0.0469854	-4	nan	676539194122344	nan
SampleB_113	22621_TRA_Data	307	19/09/2015 (7)	21:07:19.090000	24.594	22621_TRA_Data, 9:07:19 PM (24.5 sec)	3.191	0.042	0.2493	0.0034	0.68519			0.09201	0.00077	0.49405	0.0753	0.0022	5.27	0.13	1452	10	1433	17	1467	41	1461	16	-718	nan	-68	nan	-135	nan	896	nan	563	nan	398	nan	2	nan	4.01123	0.0547059	0	nan	5487233517452720	nan
SampleB_114	22622_TRA_Data	308	19/09/2015 (7)	21:08:44.120000	22.557	22622_TRA_Data, 9:08:42 PM (24.3 sec)	3.269	0.043	0.2552	0.0033	0.53714			0.09183	0.00086	0.53344	0.0741	0.0022	6.65	0.15	1471	10	1464	17	1444	42	1454	18	-526	nan	-49	nan	-74	nan	443	nan	227	nan	158	nan	2	nan	3.9185	0.0506702	-3	nan	2727677381586050	nan
SampleB_115	22623_TRA_Data	309	19/09/2015 (7)	21:10:17.990000	10.693	22623_TRA_Data, 9:10:04 PM (24.4 sec)	3.891	0.069	0.2811	0.0038	0.76538			0.0997	0.0015	0.49511	0.0835	0.0033	6.5	0.16	1612	14	1596	20	1622	60	1612	25	-752	nan	-78	nan	-114	nan	701	nan	363	nan	285	nan	2	nan	3.55745	0.0480908	0	nan	4744491659639540	nan
SampleB_116	22624_TRA_Data	310	19/09/2015 (7)	21:11:32.140000	20.542	22624_TRA_Data, 9:11:27 PM (25.2 sec)	3.46	0.049	0.2576	0.0035	0.072958			0.0966	0.0011	0.11806	0.0749	0.0022	2.885	0.069	1513	11	1475	18	1459	42	1537	21	-236	nan	-23	nan	-82	nan	158	nan	188	nan	133	nan	1	nan	3.88199	0.0527444	1	nan	1110905993357550	nan
SampleB_117	22625_TRA_Data	311	19/09/2015 (7)	21:12:48.890000	23.787	22625_TRA_Data, 9:12:49 PM (23.7 sec)	3.117	0.042	0.2509	0.0035	0.7315			0.08956	0.00077	0.53318	0.0728	0.0021	8.31	0.19	1435	11	1442	18	1419	40	1407	16	-1073	nan	-97	nan	-122	nan	970	nan	391	nan	267	nan	2	nan	3.98565	0.055599	-4	nan	5673313353982120	nan
SampleB_118	22626_TRA_Data	312	19/09/2015 (7)	21:14:11.690000	23.989	22626_TRA_Data, 9:14:12 PM (23.9 sec)	4.48	0.059	0.2989	0.0039	0.69382			0.10764	0.0009	0.47815	0.0795	0.0024	12.04	0.28	1724	11	1684	20	1546	44	1752	15	-1263	nan	-138	nan	-102	nan	856	nan	262	nan	196	nan	3	nan	3.3456	0.0436529	3	nan	5873965343594570	nan
SampleB_119	22627_TRA_Data	313	19/09/2015 (7)	21:15:33.830000	23.854	22627_TRA_Data, 9:15:34 PM (23.8 sec)	4.475	0.068	0.3066	0.0043	0.38573			0.1052	0.0012	0.33226	0.0865	0.0029	13.72	0.39	1720	13	1723	21	1673	55	1696	22	-187	nan	-19	nan	-13	nan	115	nan	30	nan	24	nan	4	nan	3.26158	0.0457429	-4	nan	789331955188362	nan
SampleB_120	22628_TRA_Data	314	19/09/2015 (7)	21:16:55.810000	25.87	22628_TRA_Data, 9:16:56 PM (25.8 sec)	3.876	0.057	0.2808	0.0038	0.45614			0.0993	0.0011	0.44719	0.0789	0.0024	3.452	0.085	1603	12	1593	19	1534	44	1596	21	-130	nan	-13	nan	-37	nan	110	nan	113	nan	84	nan	1	nan	3.56125	0.0481936	-3	nan	815868608339074	nan
SampleB_121	22629_TRA_Data	315	19/09/2015 (7)	21:18:26.440000	16.244	22629_TRA_Data, 9:18:19 PM (24 sec)	3.11	0.042	0.2554	0.0035	0.58328			0.08756	0.0008	0.49378	0.0737	0.0022	6.7	0.18	1433	11	1465	18	1437	41	1361	18	-423	nan	-36	nan	-59	nan	373	nan	193	nan	134	nan	2	nan	3.91543	0.053657	-10	nan	2303229184952480	nan
SampleB_122	22630_TRA_Data	316	19/09/2015 (7)	21:19:43.450000	21.231	22630_TRA_Data, 9:19:40 PM (24.6 sec)	1.79	0.029	0.1764	0.0025	0.35521			0.0732	0.001	0.41681	0.0507	0.0016	5.53	0.15	1037	11	1047	14	1000	32	980	29	-125	nan	-9	nan	-22	nan	125	nan	79	nan	38	nan	2	nan	5.66893	0.080342	-36	nan	538218315999199	nan
SampleB_123	22631_TRA_Data	317	19/09/2015 (7)	21:21:02.750000	24.93	22631_TRA_Data, 9:21:03 PM (24.9 sec)	4.869	0.074	0.3223	0.0045	0.52114			0.1085	0.0013	0.42956	0.0937	0.003	5.67	0.15	1790	13	1798	22	1810	55	1752	22	-143	nan	-16	nan	-25	nan	86	nan	52	nan	46	nan	2	nan	3.1027	0.0433203	-5	nan	647515718616103	nan
SampleB_124	22632_TRA_Data	318	19/09/2015 (7)	21:22:23.980000	23.124	22632_TRA_Data, 9:22:24 PM (25.7 sec)	1.819	0.028	0.1795	0.0026	0.43009			0.07298	0.00089	0.47029	0.055	0.0018	6.86	0.19	1049.8	9.9	1063	14	1081	34	982	25	-140	nan	-10	nan	-19	nan	197	nan	93	nan	48	nan	2	nan	5.57103	0.0806946	-23	nan	842039671414808	nan
SampleB_125	22633_TRA_Data	319	19/09/2015 (7)	21:23:46.410000	26.274	22633_TRA_Data, 9:23:46 PM (26.2 sec)	2.238	0.034	0.2028	0.0029	0.50099			0.07972	0.00095	0.45838	0.0638	0.002	8.37	0.22	1189	11	1189	15	1249	39	1162	24	-153	nan	-13	nan	-17	nan	174	nan	65	nan	39	nan	3	nan	4.93097	0.0705119	-9	nan	817265036879118	nan
SampleB_126	22634_TRA_Data	320	19/09/2015 (7)	21:25:09.830000	23.854	22634_TRA_Data, 9:25:10 PM (23.8 sec)	2.05	0.033	0.1905	0.0029	0.47983			0.07772	0.00099	0.43795	0.0623	0.002	6.69	0.18	1126	11	1123	16	1219	37	1113	25	-157	nan	-13	nan	-23	nan	209	nan	93	nan	54	nan	2	nan	5.24934	0.0799113	-12	nan	919869933066650	nan
SampleB_127	22641_TRA_Data	327	19/09/2015 (7)	21:35:09.620000	22.522	22641_TRA_Data, 9:35:10 PM (25 sec)	2.72	0.04	0.2317	0.0032	0.47141			0.08437	0.00094	0.48715	0.068	0.0021	6.11	0.15	1329	11	1341	17	1329	39	1282	22	-187	nan	-16	nan	-30	nan	225	nan	119	nan	78	nan	2	nan	4.31593	0.0596071	-9	nan	1245023619358960	nan
SampleB_128	22642_TRA_Data	328	19/09/2015 (7)	21:36:32.580000	25.098	22642_TRA_Data, 9:36:33 PM (25 sec)	2.15	0.03	0.1975	0.0027	0.57847			0.07823	0.00076	0.48313	0.0569	0.0017	1.823	0.042	1163.5	9.5	1161	14	1118	32	1143	19	-303	nan	-25	nan	-155	nan	397	nan	733	nan	397	nan	1	nan	5.06329	0.0692197	-6	nan	2362287041167690	nan
SampleB_129	22643_TRA_Data	329	19/09/2015 (7)	21:38:00.610000	19.07	22643_TRA_Data, 9:37:54 PM (25.2 sec)	11.62	0.16	0.4527	0.0064	0.72096			0.1847	0.0016	0.51309	0.131	0.0039	3.79	0.1	2571	13	2404	29	2487	70	2688	15	-638	nan	-121	nan	-162	nan	297	nan	263	nan	326	nan	1	nan	2.20897	0.0312291	10	nan	4076445364805050	nan
SampleB_130	22644_TRA_Data	330	19/09/2015 (7)	21:39:16.780000	25.904	22644_TRA_Data, 9:39:17 PM (25.9 sec)	4.183	0.058	0.296	0.0039	0.58531			0.10124	0.00097	0.46064	0.0843	0.0025	5.71	0.14	1667	11	1670	20	1634	47	1638	18	-354	nan	-37	nan	-60	nan	223	nan	132	nan	106	nan	2	nan	3.37838	0.0445124	-4	nan	1594499638529160	nan
SampleB_131	22645_TRA_Data	331	19/09/2015 (7)	21:40:42.550000	21.131	22645_TRA_Data, 9:40:40 PM (23.9 sec)	3.828	0.053	0.2785	0.0037	0.50911			0.0989	0.001	0.4512	0.0812	0.0025	6	0.15	1597	11	1582	19	1577	46	1590	19	-264	nan	-27	nan	-43	nan	197	nan	112	nan	86	nan	2	nan	3.59066	0.0477036	-1	nan	1340107970163960	nan
SampleB_132	22646_TRA_Data	332	19/09/2015 (7)	21:42:01.460000	11.936	22646_TRA_Data, 9:42:01 PM (24.2 sec)	3.302	0.066	0.2396	0.0036	0.60517			0.0993	0.0012	0.4131	0.0867	0.0032	8.27	0.23	1477	14	1382	18	1680	58	1599	21	-137	nan	-15	nan	-16	nan	599	nan	191	nan	157	nan	3	nan	4.17362	0.0627089	12	nan	3302312119766640	nan
SampleB_133	22647_TRA_Data	333	19/09/2015 (7)	21:43:23.360000	24.325	22647_TRA_Data, 9:43:23 PM (24.3 sec)	1.802	0.025	0.1756	0.0024	0.48545			0.07391	0.00078	0.46768	0.0512	0.0015	2.786	0.065	1044.2	9.2	1042	13	1008	29	1023	22	-159	nan	-12	nan	-55	nan	325	nan	382	nan	187	nan	1	nan	5.69476	0.0778327	-11	nan	1529803462637430	nan
SampleB_134	22648_TRA_Data	334	19/09/2015 (7)	21:44:48.790000	22.89	22648_TRA_Data, 9:44:46 PM (25.9 sec)	19.48	0.25	0.6059	0.0078	0.63475			0.2309	0.0019	0.56882	0.1584	0.0047	5.64	0.13	3062	12	3048	32	2969	82	3051	14	-483	nan	-113	nan	-84	nan	177	nan	118	nan	177	nan	2	nan	1.65044	0.0212468	0	nan	2921630112252870	nan
SampleB_135	22649_TRA_Data	335	19/09/2015 (7)	21:46:08.560000	24.123	22649_TRA_Data, 9:46:09 PM (24.1 sec)	2.156	0.033	0.1983	0.0027	0.41319			0.07827	0.00097	0.43094	0.0604	0.002	8.78	0.24	1164	11	1165	15	1184	37	1132	25	-142	nan	-11	nan	-16	nan	156	nan	58	nan	33	nan	3	nan	5.04286	0.0686623	-15	nan	722955393268064	nan
SampleB_136	22650_TRA_Data	336	19/09/2015 (7)	21:47:30.020000	24.661	22650_TRA_Data, 9:47:30 PM (24.6 sec)	3.726	0.049	0.2712	0.0035	0.63436			0.09875	0.00086	0.46744	0.0808	0.0025	13.65	0.33	1575	11	1545	18	1568	46	1594	16	-569	nan	-58	nan	-42	nan	471	nan	113	nan	86	nan	4	nan	3.68732	0.047587	2	nan	2919996538468160	nan
SampleB_137	22651_TRA_Data	337	19/09/2015 (7)	21:48:53.020000	24.661	22651_TRA_Data, 9:48:53 PM (24.6 sec)	2.1	0.038	0.193	0.003	0.36545			0.0785	0.0013	0.43088	0.058	0.0019	5.63	0.16	1141	12	1136	16	1138	37	1117	33	-67	nan	-5	nan	-13	nan	78	nan	46	nan	25	nan	2	nan	5.18135	0.0805391	-13	nan	362702050784512	nan
SampleB_138	22652_TRA_Data	338	19/09/2015 (7)	21:50:17.350000	22.331	22652_TRA_Data, 9:50:15 PM (24.7 sec)	4.146	0.053	0.2941	0.0036	0.58824			0.10135	0.00083	0.51473	0.0824	0.0024	2.767	0.064	1662	10	1660	18	1600	45	1643	15	-539	nan	-56	nan	-190	nan	418	nan	527	nan	412	nan	1	nan	3.4002	0.041621	-2	nan	3395212767913010	nan
SampleB_139	22653_TRA_Data	339	19/09/2015 (7)	21:51:38.600000	23.083	22653_TRA_Data, 9:51:37 PM (24.5 sec)	1.518	0.029	0.1598	0.0024	0.24686			0.0685	0.0012	0.43407	0.0482	0.0017	6.84	0.2	931	12	955	13	950	33	824	38	-49	nan	-4	nan	-7	nan	82	nan	41	nan	19	nan	2	nan	6.25782	0.0939848	-8	nan	310567737916915	nan
SampleB_140	22654_TRA_Data	340	19/09/2015 (7)	21:53:01.940000	21.739	22654_TRA_Data, 9:52:59 PM (24.3 sec)	2.066	0.031	0.1964	0.0027	0.42378			0.07591	0.00092	0.50008	0.0569	0.0018	9.61	0.25	1134	10	1155	15	1118	35	1077	24	-190	nan	-15	nan	-20	nan	183	nan	65	nan	35	nan	3	nan	5.09165	0.0699972	-17	nan	832143015752661	nan
[truncated: 4 more columns]

## Sheet: 7220-8-1-1370m
	Source file	Analyse nr	Date	Time	Duration(s)	Comments	Final207_235	Final207_235_Prop2SE	Final206_238	Final206_238_Prop2SE	ErrorCorrelation_6_38vs7_35	Final238_206	Final238_206_Prop2SE	Final207_206	Final207_206_Prop2SE	ErrorCorrelation_38_6vs7_6	Final208_232	Final208_232_Prop2SE	Final206_208	Final206_208_Prop2SE	FinalAge207_235	FinalAge207_235_Prop2SE	FinalAge206_238	FinalAge206_238_Prop2SE	FinalAge208_232	FinalAge208_232_Prop2SE	FinalAge207_206	FinalAge207_206_Prop2SE	Final206_204	Final206_204_Prop2SE	Final207_204	Final207_204_Prop2SE	Final208_204	Final208_204_Prop2SE	Approx_U_PPM	Approx_U_PPM_Prop2SE	Approx_Th_PPM	Approx_Th_PPM_Prop2SE	Approx_Pb_PPM	Approx_Pb_PPM_Prop2SE	FInal_U_Th_Ratio	FInal_U_Th_Ratio_Prop2SE	Final238_206	Final238_206_Prop2SE	FinalDiscPercent	FinalDiscPercent_Prop2SE	Dose	Dose_Prop2SE	PDP/histogram:
Z_GJ1_1	19651_TRA_Data	3	17/08/2015 (2)	14:37:58.620000	24.056	19651_TRA_Data, 2:37:59 PM (24 sec)	0.83	0.018	0.1001	0.0026	0.52323			0.06004	0.00097	0.43508	0.028	0.0077	no value	NAN	612	10	615	15	560	150	589	36	-11	nan	-1	nan	0	nan	296	nan	9	nan	25	nan	33	nan	9.99001	0.259481	-18	nan	631559169490344	nan
Z_GJ1_2	19652_TRA_Data	4	17/08/2015 (2)	14:39:21.030000	23.653	19652_TRA_Data, 2:39:21 PM (23.6 sec)	0.82	0.018	0.0989	0.0026	0.51406			0.06007	0.00097	0.49409	0.0285	0.0078	no value	NAN	607.3	9.7	608	15	560	150	585	36	18	nan	1	nan	0	nan	303	nan	9	nan	25	nan	34	nan	10.1112	0.265816	-15	nan	639221987349252	nan
Z_GJ1_3	19671_TRA_Data	23	17/08/2015 (2)	15:05:44.560000	24.123	19671_TRA_Data, 3:05:45 PM (24.1 sec)	0.82	0.017	0.0987	0.0026	0.43433			0.06013	0.00099	0.54369	0.0308	0.0084	no value	NAN	606.6	9.7	606	15	610	170	584	36	8	nan	1	nan	0	nan	302	nan	9	nan	24	nan	33	nan	10.1317	0.266894	-23	nan	635708510411014	nan
Z_GJ1_4	19672_TRA_Data	24	17/08/2015 (2)	15:07:06.690000	23.989	19672_TRA_Data, 3:07:07 PM (23.9 sec)	0.814	0.018	0.098	0.0025	0.55973			0.06006	0.00097	0.50614	0.032	0.0087	no value	NAN	603.6	9.8	602	15	630	170	579	35	17	nan	1	nan	0	nan	300	nan	9	nan	25	nan	34	nan	10.2041	0.260308	-9	nan	626241953577620	nan
Z_GJ1_5	19691_TRA_Data	43	17/08/2015 (2)	15:33:33.100000	20.581	19691_TRA_Data, 3:33:28 PM (25.6 sec)	0.829	0.018	0.0998	0.0026	0.44581			0.05967	0.00096	0.45435	0.0303	0.0085	no value	NAN	611.2	9.8	613	15	600	170	565	35	-127	nan	-8	nan	0	nan	280	nan	9	nan	23	nan	32	nan	10.02	0.261043	-42	nan	596424773000720	nan
Z_GJ1_6	19692_TRA_Data	44	17/08/2015 (2)	15:34:50.890000	22.762	19692_TRA_Data, 3:34:51 PM (23.4 sec)	0.811	0.018	0.0975	0.0026	0.57604			0.06032	0.00098	0.49725	0.0301	0.0083	no value	NAN	600.5	9.9	599	15	600	160	584	35	-148	nan	-9	nan	-1	nan	306	nan	9	nan	25	nan	34	nan	10.2564	0.273504	-21	nan	635713205574911	nan
Z_GJ1_7	19711_TRA_Data	63	17/08/2015 (2)	16:01:14.660000	23.854	19711_TRA_Data, 4:01:16 PM (23.8 sec)	0.822	0.018	0.0991	0.0025	0.49171			0.0603	0.00097	0.50169	0.0308	0.0084	no value	NAN	607.8	9.8	608	15	610	170	597	35	-114	nan	-7	nan	-1	nan	305	nan	9	nan	25	nan	34	nan	10.0908	0.254561	-7	nan	644431761151606	nan
Z_GJ1_8	19712_TRA_Data	64	17/08/2015 (2)	16:02:37.650000	23.288	19712_TRA_Data, 4:02:38 PM (23.9 sec)	0.817	0.018	0.0974	0.0025	0.44944			0.0607	0.001	0.46612	0.0312	0.0086	no value	NAN	605	10	599	15	620	170	600	37	-148	nan	-9	nan	-1	nan	307	nan	9	nan	26	nan	34	nan	10.2669	0.263525	17	nan	639074405690596	nan
Z_GJ1_9	19731_TRA_Data	83	17/08/2015 (2)	16:29:09.600000	18.951	19731_TRA_Data, 4:29:05 PM (26 sec)	0.83	0.018	0.1005	0.0026	0.4318			0.05965	0.00096	0.49478	0.0296	0.0081	no value	NAN	612.9	9.8	617	15	590	160	567	35	-89	nan	-5	nan	0	nan	286	nan	9	nan	24	nan	33	nan	9.95025	0.257419	-42	nan	613141827019454	nan
Z_GJ1_10	19732_TRA_Data	84	17/08/2015 (2)	16:30:31.190000	21.49	19732_TRA_Data, 4:30:27 PM (25.6 sec)	0.829	0.018	0.1005	0.0026	0.44465			0.05959	0.00097	0.47458	0.0299	0.0083	no value	NAN	612	9.9	617	15	590	160	561	35	-88	nan	-5	nan	-1	nan	280	nan	9	nan	23	nan	32	nan	9.95025	0.257419	-14	nan	601890507871505	nan
Z_GJ1_11	19751_TRA_Data	103	17/08/2015 (2)	16:56:49.950000	24.728	19751_TRA_Data, 4:56:50 PM (24.7 sec)	0.821	0.018	0.0983	0.0025	0.46644			0.06043	0.00098	0.45577	0.0294	0.008	no value	NAN	606.6	9.9	604	15	580	160	593	36	-144	nan	-9	nan	-1	nan	304	nan	9	nan	24	nan	33	nan	10.1729	0.258722	-7	nan	641956115659836	nan
Z_GJ1_12	19752_TRA_Data	104	17/08/2015 (2)	16:58:12.220000	24.459	19752_TRA_Data, 4:58:12 PM (24.4 sec)	0.816	0.017	0.0988	0.0026	0.45761			0.06	0.00098	0.50811	0.0302	0.0083	no value	NAN	604	9.7	607	15	600	160	579	36	-190	nan	-12	nan	-1	nan	300	nan	9	nan	25	nan	34	nan	10.1215	0.266354	-8	nan	632489436847278	nan
Z_GJ1_13	19771_TRA_Data	123	17/08/2015 (2)	17:24:37.620000	25.064	19771_TRA_Data, 5:24:38 PM (25 sec)	0.819	0.018	0.0988	0.0025	0.26964			0.06022	0.00098	0.27737	0.0301	0.0082	no value	NAN	604.7	9.7	607	15	600	160	580	35	-133	nan	-8	nan	0	nan	308	nan	9	nan	26	nan	33	nan	10.1215	0.25611	-1	nan	650540292804486	nan
Z_GJ1_14	19772_TRA_Data	124	17/08/2015 (2)	17:25:58.240000	25.531	19772_TRA_Data, 5:26:00 PM (24.9 sec)	0.829	0.018	0.0993	0.0025	0.48165			0.0612	0.001	0.47773	0.0288	0.0079	no value	NAN	611	10	610	15	570	150	614	36	-152	nan	-9	nan	-1	nan	297	nan	9	nan	24	nan	34	nan	10.0705	0.253537	-3	nan	629549331981358	nan
Z_GJ1_15	19791_TRA_Data	143	17/08/2015 (2)	17:52:27.250000	21.431	19791_TRA_Data, 5:52:24 PM (24.4 sec)	0.814	0.018	0.0986	0.0026	0.48781			0.05945	0.00098	0.46387	0.0299	0.0082	no value	NAN	603	9.9	606	15	590	160	565	36	-211	nan	-13	nan	-1	nan	292	nan	9	nan	24	nan	33	nan	10.142	0.267436	-39	nan	616331355462701	nan
Z_GJ1_16	19792_TRA_Data	144	17/08/2015 (2)	17:53:46.990000	24.692	19792_TRA_Data, 5:53:47 PM (24.7 sec)	0.819	0.018	0.099	0.0025	0.51411			0.05993	0.00098	0.39424	0.0292	0.008	no value	NAN	606.5	9.9	608	15	580	160	581	35	-220	nan	-13	nan	-1	nan	298	nan	9	nan	24	nan	33	nan	10.101	0.255076	-26	nan	637741576315014	nan
Z_GJ1_17	19811_TRA_Data	163	17/08/2015 (2)	18:20:16.080000	19.595	19811_TRA_Data, 6:20:12 PM (23.5 sec)	0.826	0.018	0.0988	0.0026	0.13727			0.0602	0.001	0.14784	0.047	0.013	no value	NAN	609.1	9.9	607	15	920	250	579	36	-469	nan	-30	nan	-3	nan	288	nan	9	nan	37	nan	33	nan	10.1215	0.266354	-51	nan	604721463684704	nan
Z_GJ1_18	19812_TRA_Data	164	17/08/2015 (2)	18:21:35.780000	20.577	19812_TRA_Data, 6:21:34 PM (23.4 sec)	0.818	0.018	0.0983	0.0026	0.4512			0.0603	0.001	0.50279	0.03	0.0083	no value	NAN	606.5	9.9	605	15	590	160	588	37	-384	nan	-24	nan	-1	nan	297	nan	9	nan	25	nan	33	nan	10.1729	0.269071	-22	nan	625175746136017	nan
Z_GJ1_19	19831_TRA_Data	183	17/08/2015 (2)	18:48:01.460000	23.218	19831_TRA_Data, 6:48:00 PM (24.9 sec)	0.824	0.018	0.0999	0.0026	0.47307			0.0599	0.001	0.49068	0.0286	0.0079	no value	NAN	608	10	613	15	570	160	574	37	-275	nan	-17	nan	-1	nan	296	nan	9	nan	23	nan	33	nan	10.01	0.260521	-30	nan	630422984945407	nan
Z_GJ1_20	19832_TRA_Data	184	17/08/2015 (2)	18:49:23.520000	21.633	19832_TRA_Data, 6:49:23 PM (23.8 sec)	0.832	0.018	0.0979	0.0026	0.46138			0.0618	0.001	0.54032	0.046	0.013	no value	NAN	614	10	601	15	910	240	638	37	-314	nan	-20	nan	-2	nan	304	nan	9	nan	38	nan	33	nan	10.2145	0.271274	-43	nan	637458410326279	nan
Z_GJ1_21	19851_TRA_Data	203	17/08/2015 (2)	19:15:48.020000	25.868	19851_TRA_Data, 7:15:50 PM (24.1 sec)	0.811	0.018	0.0984	0.0026	0.4998			0.06	0.001	0.54443	0.0305	0.0083	no value	NAN	600.9	9.9	604	15	600	160	582	36	-430	nan	-26	nan	-2	nan	300	nan	9	nan	24	nan	34	nan	10.1626	0.268524	-16	nan	634951583527896	nan
Z_GJ1_22	19852_TRA_Data	204	17/08/2015 (2)	19:17:13.990000	22.247	19852_TRA_Data, 7:17:12 PM (25.6 sec)	0.837	0.018	0.1002	0.0026	0.50827			0.0608	0.001	0.46724	0.0301	0.0084	no value	NAN	616.7	9.9	615	15	600	170	601	35	-430	nan	-27	nan	-2	nan	294	nan	9	nan	24	nan	33	nan	9.98004	0.258963	-35	nan	631802761629515	nan
Z_GJ1_23	19871_TRA_Data	223	17/08/2015 (2)	19:43:42.160000	20.905	19871_TRA_Data, 7:43:40 PM (24.5 sec)	0.821	0.018	0.0995	0.0026	0.41472			0.0597	0.001	0.49358	0.0302	0.0083	no value	NAN	608	9.9	611	15	600	160	569	36	-578	nan	-35	nan	-2	nan	301	nan	9	nan	25	nan	33	nan	10.0503	0.26262	-10	nan	642372996823386	nan
Z_GJ1_24	19872_TRA_Data	224	17/08/2015 (2)	19:45:02.690000	23.129	19872_TRA_Data, 7:45:03 PM (23.9 sec)	0.812	0.018	0.0986	0.0026	0.51007			0.06	0.001	0.52399	0.0305	0.0084	no value	NAN	601.4	9.9	606	15	610	160	575	37	-564	nan	-34	nan	-2	nan	303	nan	9	nan	26	nan	33	nan	10.142	0.267436	39	nan	636671522962879	nan
Z_GJ1_25	19891_TRA_Data	243	17/08/2015 (2)	20:11:31.890000	24.501	19891_TRA_Data, 8:11:33 PM (23.9 sec)	0.809	0.018	0.0976	0.0025	0.47719			0.0602	0.001	0.51184	0.03	0.008	no value	NAN	600	10	599	15	590	160	579	37	-710	nan	-45	nan	-3	nan	305	nan	9	nan	24	nan	34	nan	10.2459	0.262446	-15	nan	637918648387468	nan
Z_GJ1_26	19892_TRA_Data	244	17/08/2015 (2)	20:12:58.610000	21.493	19892_TRA_Data, 8:12:56 PM (25.1 sec)	0.832	0.018	0.1002	0.0026	0.42039			0.05964	0.00098	0.50097	0.0297	0.0082	no value	NAN	612.8	9.9	615	15	590	160	574	36	-684	nan	-42	nan	-3	nan	287	nan	9	nan	23	nan	33	nan	9.98004	0.258963	-42	nan	615412632406574	nan
Z_GJ1_27	19911_TRA_Data	263	17/08/2015 (2)	20:39:28.090000	24.594	19911_TRA_Data, 8:39:28 PM (24.5 sec)	0.823	0.018	0.0988	0.0026	0.4823			0.0606	0.001	0.51906	0.0289	0.0079	no value	NAN	608.6	9.9	607	15	570	150	593	36	-329	nan	-20	nan	-1	nan	301	nan	9	nan	24	nan	33	nan	10.1215	0.266354	-13	nan	632381015571870	nan
Z_GJ1_28	19912_TRA_Data	264	17/08/2015 (2)	20:40:50.190000	24.493	19912_TRA_Data, 8:40:50 PM (24.4 sec)	0.828	0.018	0.0994	0.0026	0.49089			0.0604	0.001	0.46452	0.03	0.0082	no value	NAN	610	10	611	15	590	160	592	36	-374	nan	-23	nan	-2	nan	298	nan	9	nan	25	nan	33	nan	10.0604	0.263148	-306	nan	630826508664354	nan
Z_GJ1_29	19931_TRA_Data	283	17/08/2015 (2)	21:07:20.190000	25.59	19931_TRA_Data, 9:07:21 PM (24.1 sec)	0.809	0.018	0.0976	0.0025	0.50326			0.0604	0.001	0.40903	0.0308	0.0084	no value	NAN	600.2	9.9	601	15	610	160	584	37	-268	nan	-17	nan	-1	nan	305	nan	9	nan	25	nan	34	nan	10.2459	0.262446	-22	nan	635250737073914	nan
Z_GJ1_30	19932_TRA_Data	284	17/08/2015 (2)	21:08:43.050000	24.627	19932_TRA_Data, 9:08:43 PM (24.6 sec)	0.819	0.018	0.0994	0.0026	0.46145			0.0594	0.001	0.49948	0.0295	0.0081	no value	NAN	605	10	610	15	590	160	561	37	-295	nan	-17	nan	-1	nan	300	nan	9	nan	24	nan	33	nan	10.0604	0.263148	-38	nan	638850877275050	nan
Z_GJ1_31	19951_TRA_Data	303	17/08/2015 (2)	21:39:46.440000	22.684	19951_TRA_Data, 9:39:46 PM (24.7 sec)	0.833	0.018	0.0991	0.0026	0.53078			0.0611	0.001	0.44737	0.0297	0.0082	no value	NAN	613	10	609	15	590	160	616	36	-2540	nan	-162	nan	-9	nan	303	nan	9	nan	24	nan	34	nan	10.0908	0.264744	-5	nan	642519117626269	nan
Z_GJ1_32	19952_TRA_Data	304	17/08/2015 (2)	21:41:08.120000	23.002	19952_TRA_Data, 9:41:08 PM (24.5 sec)	0.819	0.018	0.0993	0.0026	0.48599			0.0601	0.001	0.48269	0.0311	0.0085	no value	NAN	605	10	609	15	610	170	579	36	-2799	nan	-166	nan	-14	nan	305	nan	9	nan	26	nan	33	nan	10.0705	0.263679	0	nan	648604010148838	nan
Z_GJ1_33	19971_TRA_Data	323	17/08/2015 (2)	22:07:40.320000	24.358	19971_TRA_Data, 10:07:40 PM (24.3 sec)	0.825	0.018	0.0992	0.0026	0.47628			0.0601	0.001	0.45078	0.0289	0.0079	no value	NAN	609	10	609	15	570	150	582	37	1162	nan	73	nan	4	nan	299	nan	9	nan	24	nan	33	nan	10.0807	0.264211	-52	nan	637662582636681	nan
Z_GJ1_34	19972_TRA_Data	324	17/08/2015 (2)	22:09:04.030000	23.653	19972_TRA_Data, 10:09:04 PM (23.6 sec)	0.815	0.018	0.0986	0.0026	0.47169			0.06	0.001	0.49434	0.0301	0.0082	no value	NAN	603	10	605	15	600	160	575	37	1218	nan	75	nan	4	nan	304	nan	9	nan	25	nan	34	nan	10.142	0.267436	10	nan	639490919676991	nan
Z_GJ1_35	19991_TRA_Data	343	17/08/2015 (2)	22:35:35.080000	25.054	19991_TRA_Data, 10:35:36 PM (25.9 sec)	0.837	0.018	0.1018	0.0026	0.50009			0.0601	0.001	0.48825	0.0308	0.0083	no value	NAN	617	10	625	15	610	160	576	37	782	nan	48	nan	3	nan	301	nan	9	nan	26	nan	33	nan	9.82318	0.250887	-6	nan	657154858353703	nan
Z_GJ1_36	19992_TRA_Data	344	17/08/2015 (2)	22:36:59.400000	23.283	19992_TRA_Data, 10:36:59 PM (23.2 sec)	0.816	0.018	0.0982	0.0026	0.49468			0.0598	0.001	0.55006	0.0296	0.0081	no value	NAN	604	10	604	15	580	160	569	38	744	nan	45	nan	3	nan	302	nan	9	nan	25	nan	34	nan	10.1833	0.269619	-29	nan	632529412617522	nan
Z_GJ1_37	20011_TRA_Data	363	17/08/2015 (2)	23:03:30.460000	24.224	20011_TRA_Data, 11:03:30 PM (24.2 sec)	0.818	0.018	0.0989	0.0026	0.49597			0.0598	0.001	0.40305	0.0299	0.0082	no value	NAN	604	10	607	15	590	160	561	36	252	nan	15	nan	1	nan	303	nan	9	nan	25	nan	34	nan	10.1112	0.265816	-13	nan	638369298348846	nan
Z_GJ1_38	20012_TRA_Data	364	17/08/2015 (2)	23:04:52.830000	22.539	20012_TRA_Data, 11:04:53 PM (23.8 sec)	0.815	0.018	0.098	0.0026	0.49436			0.06	0.001	0.52293	0.0319	0.0087	no value	NAN	603.6	9.9	602	15	630	170	580	37	229	nan	14	nan	1	nan	304	nan	9	nan	26	nan	33	nan	10.2041	0.27072	-11	nan	635708595970404	nan
		#VALUE!
Z_Plesovice_1	19653_TRA_Data	5	17/08/2015 (2)	14:41:04.070000	5.6096	19653_TRA_Data, 2:41:04 PM (5.6 sec)	0.3133	0.0084	0.0387	0.0011	0.052215			0.0579	0.0015	0.58704	0.0116	0.0032	no value	NAN	276.3	6.5	244.6	6.6	235	65	499	58	66	nan	3	nan	2	nan	418	nan	117	nan	134	nan	4	nan	25.8398	0.734464	55	nan	364368893948762	nan
Z_Plesovice_2	19654_TRA_Data	6	17/08/2015 (2)	14:42:24.340000	9.3392	19654_TRA_Data, 2:42:24 PM (9.33 sec)	0.407	0.014	0.0399	0.0011	0.38702			0.0727	0.0021	0.10255	0.0237	0.0066	no value	NAN	345	10	252.4	6.8	470	130	939	59	112	nan	9	nan	11	nan	450	nan	116	nan	267	nan	4	nan	25.0627	0.69095	67	nan	402550961513128	nan
Z_Plesovice_3	19673_TRA_Data	25	17/08/2015 (2)	15:08:48.300000	6.3824	19673_TRA_Data, 3:08:48 PM (6.38 sec)	0.3183	0.0084	0.0384	0.001	0.15606			0.0593	0.0015	0.4825	0.0116	0.0032	no value	NAN	280.1	6.4	243.1	6.5	234	63	547	54	40	nan	2	nan	3	nan	430	nan	127	nan	134	nan	3	nan	26.0417	0.678168	29	nan	372990214094331	nan
Z_Plesovice_4	19674_TRA_Data	26	17/08/2015 (2)	15:10:08.880000	8.8016	19674_TRA_Data, 3:10:09 PM (8.8 sec)	0.3189	0.008	0.0392	0.001	0.28266			0.0579	0.0012	0.39501	0.0134	0.0036	no value	NAN	281	6.3	247.9	6.5	268	72	498	47	51	nan	3	nan	2	nan	468	nan	125	nan	152	nan	4	nan	25.5102	0.650771	45	nan	410764266249832	nan
Z_Plesovice_5	19693_TRA_Data	45	17/08/2015 (2)	15:36:31.650000	8.0288	19693_TRA_Data, 3:36:32 PM (8.02 sec)	0.314	0.0079	0.0375	0.001	0.35605			0.0598	0.0013	0.48107	0.0125	0.0034	no value	NAN	276.8	6.1	237.4	6.4	251	68	568	49	6	nan	1	nan	1	nan	498	nan	134	nan	151	nan	4	nan	26.6667	0.711111	56	nan	420170758663194	nan
Z_Plesovice_6	19694_TRA_Data	46	17/08/2015 (2)	15:37:51.970000	9.7088	19694_TRA_Data, 3:37:52 PM (9.7 sec)	0.3332	0.0081	0.0404	0.0011	0.30727			0.0589	0.0012	0.44683	0.0147	0.004	no value	NAN	291.5	6.2	255.2	6.6	295	79	540	45	-104	nan	-6	nan	-6	nan	506	nan	120	nan	160	nan	4	nan	24.7525	0.673953	45	nan	455440089669887	nan
Z_Plesovice_7	19713_TRA_Data	65	17/08/2015 (2)	16:04:18.850000	7.8272	19713_TRA_Data, 4:04:19 PM (7.82 sec)	0.3106	0.008	0.0384	0.0011	0.44131			0.0578	0.0012	0.43818	0.0122	0.0033	no value	NAN	274.5	6.3	242.7	6.7	245	66	500	48	-11	nan	-1	nan	0	nan	482	nan	120	nan	134	nan	4	nan	26.0417	0.745985	41	nan	413633158948328	nan
Z_Plesovice_8	19714_TRA_Data	66	17/08/2015 (2)	16:05:39.890000	11.792	19714_TRA_Data, 4:05:40 PM (11.7 sec)	0.3257	0.0077	0.0413	0.0011	0.42804			0.056	0.0011	0.41132	0.013	0.0035	no value	NAN	285.7	5.9	261.1	6.8	261	70	429	41	-96	nan	-5	nan	-4	nan	502	nan	111	nan	132	nan	4	nan	24.2131	0.6449	33	nan	461577752936448	nan
Z_Plesovice_9	19733_TRA_Data	85	17/08/2015 (2)	16:32:10.130000	6.5504	19733_TRA_Data, 4:32:10 PM (6.55 sec)	0.3043	0.0082	0.0379	0.001	0.058542			0.0572	0.0014	0.49538	0.0111	0.003	no value	NAN	269.3	6.3	240	6.2	223	60	474	55	-75	nan	-4	nan	-3	nan	429	nan	112	nan	114	nan	4	nan	26.3852	0.69618	52	nan	364904908125903	nan
Z_Plesovice_10	19734_TRA_Data	86	17/08/2015 (2)	16:33:28.220000	11.456	19734_TRA_Data, 4:33:28 PM (11.4 sec)	0.3483	0.0086	0.0417	0.001	0.057553			0.0595	0.0013	0.44539	0.0155	0.0042	no value	NAN	302.7	6.5	263.4	6.5	310	83	553	46	-36	nan	-2	nan	-1	nan	479	nan	114	nan	162	nan	4	nan	23.9808	0.575079	30	nan	443294715439613	nan
Z_Plesovice_11	19753_TRA_Data	105	17/08/2015 (2)	16:59:57.880000	4.8032	19753_TRA_Data, 4:59:58 PM (4.8 sec)	0.3169	0.0094	0.0374	0.0011	0.12599			0.0605	0.0017	0.48217	0.0125	0.0034	no value	NAN	279	7.2	236.9	6.5	252	68	585	62	-17	nan	-1	nan	0	nan	427	nan	114	nan	134	nan	4	nan	26.738	0.786411	58	nan	358575323723747	nan
Z_Plesovice_12	19754_TRA_Data	106	17/08/2015 (2)	17:01:19.140000	5.5424	19754_TRA_Data, 5:01:19 PM (5.54 sec)	0.2971	0.0078	0.0375	0.001	0.08007			0.0568	0.0015	0.55981	0.0106	0.0029	no value	NAN	263.8	6.1	237.1	6.4	213	58	458	56	-70	nan	-4	nan	-3	nan	411	nan	114	nan	112	nan	4	nan	26.6667	0.711111	44	nan	347474243942462	nan
Z_Plesovice_13	19773_TRA_Data	125	17/08/2015 (2)	17:27:43.870000	5.8112	19773_TRA_Data, 5:27:44 PM (5.81 sec)	0.3135	0.0085	0.0377	0.001	0.10076			0.0595	0.0016	0.47592	0.0123	0.0033	no value	NAN	276.4	6.6	238.6	6.3	247	67	553	57	-70	nan	-5	nan	-3	nan	451	nan	114	nan	134	nan	4	nan	26.5252	0.703586	68	nan	381432432734610	nan
Z_Plesovice_14	19774_TRA_Data	126	17/08/2015 (2)	17:29:08.010000	4.6688	19774_TRA_Data, 5:29:08 PM (4.66 sec)	0.2972	0.0083	0.0381	0.0011	0.047374			0.0558	0.0015	0.53961	0.0102	0.0028	no value	NAN	263.8	6.5	241	6.6	204	56	424	62	-97	nan	-5	nan	-3	nan	422	nan	108	nan	104	nan	4	nan	26.2467	0.757779	57	nan	360146165572822	nan
Z_Plesovice_15	19793_TRA_Data	145	17/08/2015 (2)	17:55:25.030000	10.65	19793_TRA_Data, 5:55:25 PM (10.6 sec)	0.3359	0.0077	0.0412	0.0011	0.11003			0.0581	0.0012	0.55328	0.0134	0.0036	no value	NAN	293.9	5.9	260.2	6.5	269	72	512	44	-185	nan	-11	nan	-8	nan	448	nan	116	nan	144	nan	4	nan	24.2718	0.648035	53	nan	414631726061109	nan
Z_Plesovice_16	19794_TRA_Data	146	17/08/2015 (2)	17:56:48.200000	10.482	19794_TRA_Data, 5:56:48 PM (10.4 sec)	0.3322	0.0078	0.0418	0.0011	0.23463			0.0567	0.0011	0.43418	0.0134	0.0036	no value	NAN	290.7	6	263.7	6.6	269	72	454	42	-176	nan	-10	nan	-8	nan	459	nan	116	nan	145	nan	4	nan	23.9234	0.629564	72	nan	430279361831176	nan
Z_Plesovice_17	19813_TRA_Data	165	17/08/2015 (2)	18:23:13.140000	9.5408	19813_TRA_Data, 6:23:13 PM (9.54 sec)	0.3279	0.0078	0.0412	0.0011	0.28996			0.0567	0.0011	0.41925	0.013	0.0035	no value	NAN	287.5	6	260	6.6	261	70	458	43	-287	nan	-16	nan	-11	nan	477	nan	123	nan	147	nan	4	nan	24.2718	0.648035	63	nan	439548353497578	nan
Z_Plesovice_18	19814_TRA_Data	166	17/08/2015 (2)	18:24:36.530000	11.154	19814_TRA_Data, 6:24:37 PM (11.1 sec)	0.327	0.0075	0.0416	0.0011	0.34027			0.0562	0.0011	0.42432	0.013	0.0035	no value	NAN	286.8	5.8	262.7	6.6	261	70	436	41	-231	nan	-13	nan	-9	nan	456	nan	115	nan	137	nan	4	nan	24.0385	0.635632	30	nan	424749482620410	nan
Z_Plesovice_19	19833_TRA_Data	185	17/08/2015 (2)	18:51:00.870000	9.8096	19833_TRA_Data, 6:51:01 PM (9.8 sec)	0.3195	0.0075	0.0413	0.0011	0.23958			0.0553	0.0011	0.49879	0.0127	0.0034	no value	NAN	281.1	5.8	261.1	6.6	254	68	404	45	-179	nan	-10	nan	-7	nan	485	nan	127	nan	145	nan	4	nan	24.2131	0.6449	73	nan	450197624775164	nan
Z_Plesovice_20	19834_TRA_Data	186	17/08/2015 (2)	18:52:24.810000	8.8688	19834_TRA_Data, 6:52:25 PM (8.86 sec)	0.3215	0.0079	0.0407	0.001	0.17169			0.0565	0.0012	0.44338	0.0124	0.0034	no value	NAN	282.6	6	256.8	6.5	249	67	446	47	-233	nan	-13	nan	-9	nan	476	nan	126	nan	141	nan	4	nan	24.57	0.603686	74	nan	433860752171256	nan
Z_Plesovice_21	19853_TRA_Data	205	17/08/2015 (2)	19:18:51.310000	9.3728	19853_TRA_Data, 7:18:51 PM (9.37 sec)	0.3219	0.0075	0.0413	0.0011	0.2255			0.0555	0.0011	0.46805	0.012	0.0033	no value	NAN	283	5.7	261.1	6.6	241	65	410	44	-280	nan	-16	nan	-9	nan	492	nan	114	nan	126	nan	4	nan	24.2131	0.6449	29	nan	454114890592934	nan
Z_Plesovice_22	19854_TRA_Data	206	17/08/2015 (2)	19:20:12.590000	11.086	19854_TRA_Data, 7:20:13 PM (11 sec)	0.343	0.008	0.042	0.0011	0.14782			0.0582	0.0012	0.53681	0.014	0.0038	no value	NAN	298.9	6.1	265.1	6.7	282	76	515	45	-323	nan	-19	nan	-14	nan	484	nan	117	nan	149	nan	4	nan	23.8095	0.623583	36	nan	454278305278484	nan
Z_Plesovice_23	19873_TRA_Data	225	17/08/2015 (2)	19:46:42.930000	10.75	19873_TRA_Data, 7:46:43 PM (10.7 sec)	0.3282	0.0076	0.0415	0.001	0.10054			0.0565	0.0011	0.47412	0.0125	0.0034	no value	NAN	287.7	5.8	262	6.5	250	67	442	44	-358	nan	-20	nan	-12	nan	510	nan	118	nan	134	nan	4	nan	24.0964	0.580636	53	nan	470879785032090	nan
Z_Plesovice_24	19874_TRA_Data	226	17/08/2015 (2)	19:48:02.510000	13.17	19874_TRA_Data, 7:48:03 PM (13.1 sec)	0.3348	0.0075	0.0431	0.0011	0.10921			0.0554	0.001	0.50097	0.0136	0.0037	no value	NAN	292.8	5.7	272.2	6.7	274	73	399	41	-488	nan	-27	nan	-17	nan	520	nan	114	nan	141	nan	5	nan	23.2019	0.592159	17	nan	498395329186013	nan
Z_Plesovice_25	19893_TRA_Data	245	17/08/2015 (2)	20:14:34.760000	10.918	19893_TRA_Data, 8:14:35 PM (10.9 sec)	0.3372	0.0077	0.0416	0.0011	0.19189			0.058	0.0011	0.49709	0.0136	0.0037	no value	NAN	294.6	5.8	262.7	6.6	274	75	502	42	-525	nan	-31	nan	-21	nan	511	nan	128	nan	159	nan	4	nan	24.0385	0.635632	44	nan	474731515440913	nan
Z_Plesovice_26	19894_TRA_Data	246	17/08/2015 (2)	20:15:54.750000	11.926	19894_TRA_Data, 8:15:55 PM (11.9 sec)	0.3297	0.0077	0.0413	0.0011	0.44379			0.057	0.001	0.35866	0.0149	0.004	no value	NAN	288.8	5.9	260.7	6.7	298	80	466	40	-354	nan	-20	nan	-14	nan	542	nan	116	nan	156	nan	5	nan	24.2131	0.6449	46	nan	495000082654248	nan
Z_Plesovice_27	19913_TRA_Data	265	17/08/2015 (2)	20:42:34.440000	5.24	19913_TRA_Data, 8:42:34 PM (5.24 sec)	0.3029	0.009	0.0385	0.0011	0.15296			0.0564	0.0015	0.39621	0.01	0.0027	no value	NAN	268.1	7	243.4	6.5	201	55	450	60	-201	nan	-12	nan	-7	nan	389	nan	113	nan	105	nan	3	nan	25.974	0.742115	58	nan	337811119228980	nan
Z_Plesovice_28	19914_TRA_Data	266	17/08/2015 (2)	20:43:49.520000	12.162	19914_TRA_Data, 8:43:50 PM (12.1 sec)	0.43	0.015	0.0438	0.0012	0.57858			0.0695	0.0018	-0.053964	0.0171	0.0047	no value	NAN	362	10	276.3	7.3	341	92	858	54	-217	nan	-14	nan	-14	nan	359	nan	117	nan	169	nan	3	nan	22.8311	0.625508	52	nan	349914767569643	nan
Z_Plesovice_29	19933_TRA_Data	285	17/08/2015 (2)	21:10:21.160000	11.523	19933_TRA_Data, 9:10:21 PM (11.5 sec)	0.3489	0.0082	0.042	0.0011	0.036329			0.0592	0.0012	0.5743	0.0143	0.0039	no value	NAN	303.6	6.2	265.2	6.7	288	77	548	45	-188	nan	-12	nan	-9	nan	477	nan	124	nan	169	nan	4	nan	23.8095	0.623583	53	nan	449990103200167	nan
Z_Plesovice_30	19934_TRA_Data	286	17/08/2015 (2)	21:11:41.040000	13.64	19934_TRA_Data, 9:11:41 PM (13.6 sec)	0.3461	0.0075	0.0441	0.0011	0.21704			0.05608	0.00099	0.53145	0.0142	0.0038	no value	NAN	301.8	5.7	278.1	6.9	285	76	439	39	-166	nan	-10	nan	-7	nan	503	nan	121	nan	159	nan	4	nan	22.6757	0.565608	36	nan	495208223515192	nan
Z_Plesovice_31	19953_TRA_Data	305	17/08/2015 (2)	21:42:44.070000	13.606	19953_TRA_Data, 9:42:44 PM (13.6 sec)	0.3416	0.0078	0.0437	0.0011	0.17244			0.0559	0.0011	0.49648	0.0139	0.0037	no value	NAN	297.8	5.9	275.5	6.9	279	75	420	43	-2790	nan	-157	nan	-113	nan	479	nan	117	nan	150	nan	4	nan	22.8833	0.57601	39	nan	466563148766664	nan
Z_Plesovice_32	19954_TRA_Data	306	17/08/2015 (2)	21:44:06.570000	14.11	19954_TRA_Data, 9:44:07 PM (14.1 sec)	0.3452	0.0076	0.0443	0.0011	0.2829			0.0557	0.001	0.44513	0.0134	0.0036	no value	NAN	300.6	5.8	279.4	6.9	270	72	418	39	-4269	nan	-240	nan	-159	nan	513	nan	124	nan	156	nan	4	nan	22.5734	0.560512	108	nan	506521128061031	nan
Z_Plesovice_33	19973_TRA_Data	325	17/08/2015 (2)	22:10:39.320000	12.363	19973_TRA_Data, 10:10:39 PM (12.3 sec)	0.3402	0.0076	0.0436	0.0011	0.23976			0.0557	0.001	0.45067	0.0144	0.0039	no value	NAN	296.9	5.8	275.1	6.8	289	78	417	41	1040	nan	58	nan	41	nan	542	nan	120	nan	161	nan	4	nan	22.9358	0.578655	47	nan	525131102921351	nan
Z_Plesovice_34	19974_TRA_Data	326	17/08/2015 (2)	22:11:59.330000	15.354	19974_TRA_Data, 10:11:59 PM (15.3 sec)	0.3331	0.0075	0.0436	0.0011	0.40326			0.0546	0.00095	0.44009	0.0136	0.0037	no value	NAN	291.4	5.7	274.9	6.9	273	74	378	39	891	nan	48	nan	31	nan	565	nan	128	nan	162	nan	4	nan	22.9358	0.578655	29	nan	544677855248708	nan
Z_Plesovice_35	19993_TRA_Data	345	17/08/2015 (2)	22:38:34.420000	12.262	19993_TRA_Data, 10:38:34 PM (12.2 sec)	0.3236	0.0077	0.0412	0.0011	0.43984			0.0558	0.001	0.38499	0.0126	0.0034	no value	NAN	284	5.9	260	6.7	252	68	420	42	586	nan	33	nan	20	nan	579	nan	122	nan	144	nan	5	nan	24.2718	0.648035	21	nan	528825660739845	nan
Z_Plesovice_36	19994_TRA_Data	346	17/08/2015 (2)	22:39:54.880000	16.798	19994_TRA_Data, 10:39:55 PM (16.7 sec)	0.3517	0.0079	0.0451	0.0012	0.41824			0.05563	0.00097	0.38688	0.015	0.004	no value	NAN	305.3	5.9	284.4	7.2	301	80	414	39	638	nan	37	nan	25	nan	578	nan	116	nan	163	nan	5	nan	22.173	0.589968	36	nan	573605345503478	nan
Z_Plesovice_37	20013_TRA_Data	365	17/08/2015 (2)	23:06:27.940000	13.741	20013_TRA_Data, 11:06:28 PM (13.7 sec)	0.3295	0.0077	0.0423	0.0011	0.51115			0.05541	0.00097	0.33068	0.0135	0.0036	no value	NAN	288.5	5.9	267.3	6.9	270	72	411	39	255	nan	14	nan	9	nan	562	nan	123	nan	150	nan	5	nan	23.6407	0.614769	30	nan	525356640155653	nan
Z_Plesovice_38	20014_TRA_Data	366	17/08/2015 (2)	23:07:49.060000	15.622	20014_TRA_Data, 11:07:49 PM (15.6 sec)	0.3417	0.0078	0.0437	0.0011	0.4631			0.05549	0.00097	0.32867	0.0143	0.0039	no value	NAN	298	5.8	275.9	6.9	287	77	405	38	207	nan	11	nan	8	nan	582	nan	121	nan	157	nan	5	nan	22.8833	0.57601	-49	nan	561665708120720	nan
		#VALUE!
Z_91500_1	19649_TRA_Data	1	17/08/2015 (2)	14:35:15.570000	22.763	19649_TRA_Data, 2:35:13 PM (25.6 sec)	1.932	0.043	0.1861	0.0049	0.42052			0.0754	0.0013	0.43595	0.052	0.014	no value	NAN	1089	15	1098	27	1030	270	1050	36	8	nan	1	nan	0	nan	59	nan	37	nan	193	nan	2	nan	5.37345	0.141483	-27	nan	268317235397388	nan
Z_91500_2	19650_TRA_Data	2	17/08/2015 (2)	14:36:34.990000	22.737	19650_TRA_Data, 2:36:35 PM (23.6 sec)	1.864	0.043	0.1801	0.0047	0.39671			0.075	0.0013	0.4396	0.051	0.014	no value	NAN	1063	15	1066	26	1010	260	1041	37	21	nan	2	nan	2	nan	63	nan	39	nan	196	nan	2	nan	5.55247	0.144901	-17	nan	273916110782148	nan
Z_91500_3	19669_TRA_Data	21	17/08/2015 (2)	15:02:58.040000	25.635	19669_TRA_Data, 3:02:58 PM (25.6 sec)	1.905	0.043	0.1841	0.0048	0.39587			0.0755	0.0013	0.42456	0.058	0.016	no value	NAN	1078	15	1089	26	1140	300	1045	37	10	nan	1	nan	1	nan	61	nan	38	nan	200	nan	2	nan	5.43183	0.141623	-10	nan	275230704154967	nan
Z_91500_4	19670_TRA_Data	22	17/08/2015 (2)	15:04:20.280000	25.4	19670_TRA_Data, 3:04:20 PM (25.4 sec)	1.902	0.042	0.183	0.0047	0.013875			0.0758	0.0013	0.05496	0.055	0.015	no value	NAN	1076	15	1082	26	1070	280	1046	36	1	nan	0	nan	0	nan	61	nan	38	nan	190	nan	2	nan	5.46448	0.140345	-31	nan	272106377143090	nan
Z_91500_5	19689_TRA_Data	41	17/08/2015 (2)	15:30:42.560000	24.123	19689_TRA_Data, 3:30:43 PM (24.1 sec)	1.886	0.044	0.1807	0.0048	0.6412			0.0759	0.0014	0.35962	0.054	0.015	no value	NAN	1069	15	1068	26	1060	280	1057	38	-46	nan	-4	nan	-6	nan	61	nan	39	nan	188	nan	2	nan	5.53403	0.147003	-18	nan	267925760996847	nan
Z_91500_6	19690_TRA_Data	42	17/08/2015 (2)	15:32:05.020000	24.661	19690_TRA_Data, 3:32:05 PM (24.6 sec)	1.895	0.042	0.181	0.0047	0.40254			0.0761	0.0014	0.49454	0.055	0.015	no value	NAN	1075	15	1071	26	1090	290	1068	36	-53	nan	-4	nan	-6	nan	61	nan	39	nan	194	nan	2	nan	5.52486	0.143463	-19	nan	272927452875263	nan
Z_91500_7	19709_TRA_Data	61	17/08/2015 (2)	15:58:27.580000	24.185	19709_TRA_Data, 3:58:29 PM (23.9 sec)	1.885	0.05	0.1798	0.0047	0.022962			0.076	0.0016	0.035615	0.054	0.015	no value	NAN	1064	12	1066	26	1070	280	1040	34	-62	nan	-5	nan	-7	nan	64	nan	40	nan	195	nan	2	nan	5.56173	0.145385	-20	nan	282089018238506	nan
Z_91500_8	19710_TRA_Data	62	17/08/2015 (2)	15:59:53.500000	21.342	19710_TRA_Data, 3:59:51 PM (25.7 sec)	1.9	0.042	0.1823	0.0047	0.31694			0.0754	0.0013	0.45574	0.055	0.015	no value	NAN	1076	15	1078	26	1070	280	1048	36	-35	nan	-3	nan	-4	nan	62	nan	40	nan	196	nan	2	nan	5.48546	0.141425	-23	nan	279045769601722	nan
Z_91500_9	19729_TRA_Data	81	17/08/2015 (2)	16:26:19.940000	20.865	19729_TRA_Data, 4:26:18 PM (24.1 sec)	1.865	0.043	0.1812	0.0047	0.33816			0.0745	0.0014	0.44727	0.054	0.015	no value	NAN	1064	15	1072	26	1070	280	1028	37	-41	nan	-3	nan	-5	nan	62	nan	39	nan	192	nan	2	nan	5.51876	0.143147	-26	nan	271664748888915	nan
Z_91500_10	19730_TRA_Data	82	17/08/2015 (2)	16:27:42.430000	23.252	19730_TRA_Data, 4:27:41 PM (25.1 sec)	1.882	0.042	0.1813	0.0047	0.30785			0.0753	0.0014	0.46119	0.054	0.015	no value	NAN	1071	15	1074	26	1070	280	1048	36	-46	nan	-4	nan	-5	nan	61	nan	38	nan	187	nan	2	nan	5.51572	0.142989	-22	nan	268976520388097	nan
Z_91500_11	19749_TRA_Data	101	17/08/2015 (2)	16:54:04.150000	25.534	19749_TRA_Data, 4:54:04 PM (25.5 sec)	1.883	0.044	0.1818	0.0048	0.015377			0.0755	0.0014	0.073476	0.054	0.015	no value	NAN	1066	14	1076	26	1060	280	1030	38	-68	nan	-5	nan	-8	nan	62	nan	38	nan	190	nan	2	nan	5.50055	0.145229	-21	nan	276978905554662	nan
Z_91500_12	19750_TRA_Data	102	17/08/2015 (2)	16:55:24.820000	23.717	19750_TRA_Data, 4:55:26 PM (23.8 sec)	1.851	0.043	0.1787	0.0047	0.42022			0.0754	0.0014	0.45175	0.053	0.014	no value	NAN	1059	15	1059	26	1050	280	1039	39	-70	nan	-5	nan	-8	nan	65	nan	40	nan	196	nan	2	nan	5.59597	0.14718	29	nan	280978058158373	nan
Z_91500_13	19769_TRA_Data	121	17/08/2015 (2)	17:21:52.910000	21.143	19769_TRA_Data, 5:21:51 PM (23.9 sec)	1.869	0.043	0.1793	0.0046	0.39687			0.0751	0.0014	0.39673	0.053	0.014	no value	NAN	1064	15	1062	25	1050	270	1038	37	-53	nan	-4	nan	-5	nan	61	nan	38	nan	192	nan	2	nan	5.57724	0.143086	-20	nan	269424092760185	nan
Z_91500_14	19770_TRA_Data	122	17/08/2015 (2)	17:23:13.730000	23.118	19770_TRA_Data, 5:23:14 PM (24 sec)	1.837	0.041	0.1787	0.0047	0.32205			0.0751	0.0014	0.50184	0.053	0.014	no value	NAN	1055	15	1058	25	1050	280	1035	37	-46	nan	-4	nan	-5	nan	63	nan	39	nan	196	nan	2	nan	5.59597	0.14718	-23	nan	276864432315277	nan
Z_91500_15	19789_TRA_Data	141	17/08/2015 (2)	17:49:36.890000	22.362	19789_TRA_Data, 5:49:37 PM (23.7 sec)	1.858	0.042	0.1786	0.0047	0.45256			0.0756	0.0013	0.48883	0.055	0.015	no value	NAN	1061	15	1058	26	1070	280	1057	36	-59	nan	-4	nan	-7	nan	65	nan	40	nan	203	nan	2	nan	5.5991	0.147345	-14	nan	281886146324229	nan
Z_91500_16	19790_TRA_Data	142	17/08/2015 (2)	17:51:00.200000	22.928	19790_TRA_Data, 5:51:00 PM (23.5 sec)	1.847	0.042	0.1772	0.0046	0.30322			0.0757	0.0014	0.49603	0.054	0.015	no value	NAN	1057	15	1051	25	1060	280	1048	38	-72	nan	-5	nan	-8	nan	64	nan	40	nan	199	nan	2	nan	5.64334	0.146498	-22	nan	277919542187671	nan
Z_91500_17	19809_TRA_Data	161	17/08/2015 (2)	18:17:25.360000	24.325	19809_TRA_Data, 6:17:25 PM (24.3 sec)	1.864	0.044	0.1812	0.0048	0.29496			0.0752	0.0014	0.30904	0.055	0.015	no value	NAN	1062	15	1072	26	1080	280	1031	38	-157	nan	-11	nan	-16	nan	64	nan	39	nan	198	nan	2	nan	5.51876	0.146192	-28	nan	280294855590825	nan
Z_91500_18	19810_TRA_Data	162	17/08/2015 (2)	18:18:48.350000	25.333	19810_TRA_Data, 6:18:48 PM (25.3 sec)	1.87	0.042	0.1819	0.0047	0.30174			0.0753	0.0014	0.47493	0.054	0.015	no value	NAN	1064	15	1076	26	1070	280	1033	38	-142	nan	-11	nan	-15	nan	63	nan	39	nan	192	nan	2	nan	5.49753	0.142047	-25	nan	278324711393335	nan
Z_91500_19	19829_TRA_Data	181	17/08/2015 (2)	18:45:15.760000	18.874	19829_TRA_Data, 6:45:13 PM (24.5 sec)	1.869	0.043	0.1806	0.0048	0.49074			0.0752	0.0013	0.36729	0.053	0.014	no value	NAN	1066	15	1068	26	1040	270	1049	35	-156	nan	-12	nan	-17	nan	64	nan	40	nan	190	nan	2	nan	5.5371	0.147165	-18	nan	279258264356897	nan
Z_91500_20	19830_TRA_Data	182	17/08/2015 (2)	18:46:34.650000	24.599	19830_TRA_Data, 6:46:36 PM (24 sec)	1.832	0.042	0.1785	0.0046	0.37778			0.075	0.0013	0.43534	0.053	0.014	no value	NAN	1053	15	1057	25	1040	280	1040	37	-137	nan	-10	nan	-15	nan	65	nan	40	nan	194	nan	2	nan	5.60224	0.144372	-22	nan	283944427147011	nan
Z_91500_21	19849_TRA_Data	201	17/08/2015 (2)	19:13:01.460000	24.224	19849_TRA_Data, 7:13:01 PM (24.2 sec)	1.851	0.043	0.1781	0.0046	0.3575			0.0751	0.0014	0.4753	0.055	0.015	no value	NAN	1058	15	1056	25	1080	280	1042	38	-152	nan	-11	nan	-17	nan	65	nan	41	nan	201	nan	2	nan	5.61482	0.145021	-23	nan	283374111530251	nan
Z_91500_22	19850_TRA_Data	202	17/08/2015 (2)	19:14:23.200000	24.569	19850_TRA_Data, 7:14:25 PM (23.8 sec)	1.843	0.042	0.1779	0.0047	0.17106			0.076	0.0014	0.39466	0.055	0.015	no value	NAN	1052	15	1053	26	1080	280	1059	37	-156	nan	-12	nan	-18	nan	68	nan	42	nan	204	nan	2	nan	5.62113	0.148507	-22	nan	295056314738586	nan
Z_91500_23	19869_TRA_Data	221	17/08/2015 (2)	19:40:56.530000	21.046	19869_TRA_Data, 7:40:54 PM (25.8 sec)	1.881	0.043	0.1826	0.0048	0.32442			0.0748	0.0013	0.47275	0.054	0.015	no value	NAN	1069	15	1081	26	1060	280	1025	37	-183	nan	-14	nan	-19	nan	61	nan	38	nan	184	nan	2	nan	5.47645	0.143959	-14	nan	269952318866778	nan
Z_91500_24	19870_TRA_Data	222	17/08/2015 (2)	19:42:21.100000	19.477	19870_TRA_Data, 7:42:17 PM (25.9 sec)	1.889	0.044	0.1821	0.0048	0.13377			0.0752	0.0014	0.14318	0.055	0.015	no value	NAN	1070	15	1077	26	1080	280	1028	38	-204	nan	-16	nan	-23	nan	59	nan	37	nan	187	nan	2	nan	5.49149	0.144751	-25	nan	263652929483957	nan
Z_91500_25	19889_TRA_Data	241	17/08/2015 (2)	20:08:45.690000	23.989	19889_TRA_Data, 8:08:46 PM (23.9 sec)	1.846	0.042	0.1791	0.0047	0.14647			0.0751	0.0014	0.46894	0.054	0.015	no value	NAN	1058	15	1060	26	1060	280	1038	37	-251	nan	-19	nan	-26	nan	63	nan	39	nan	192	nan	2	nan	5.58347	0.146523	-29	nan	277003018316644	nan
Z_91500_26	19890_TRA_Data	242	17/08/2015 (2)	20:10:13.570000	21.115	19890_TRA_Data, 8:10:09 PM (25.8 sec)	1.865	0.042	0.1808	0.0047	0.34125			0.0745	0.0014	0.43684	0.055	0.015	no value	NAN	1065	15	1070	26	1080	280	1030	37	-298	nan	-23	nan	-32	nan	59	nan	37	nan	186	nan	2	nan	5.53097	0.143781	-22	nan	261509963201388	nan
Z_91500_27	19909_TRA_Data	261	17/08/2015 (2)	20:36:40.850000	24.829	19909_TRA_Data, 8:36:41 PM (24.8 sec)	1.866	0.043	0.1802	0.0047	0.35307			0.0757	0.0014	0.45069	0.055	0.015	no value	NAN	1064	15	1068	25	1080	280	1045	38	-129	nan	-10	nan	-14	nan	63	nan	39	nan	195	nan	2	nan	5.54939	0.14474	-31	nan	276638672136934	nan
Z_91500_28	19910_TRA_Data	262	17/08/2015 (2)	20:38:03.050000	24.627	19910_TRA_Data, 8:38:03 PM (24.6 sec)	1.868	0.042	0.1806	0.0047	0.33487			0.0757	0.0014	0.46311	0.055	0.015	no value	NAN	1066	15	1068	26	1090	290	1047	38	-123	nan	-9	nan	-14	nan	65	nan	40	nan	203	nan	2	nan	5.5371	0.144099	-31	nan	284899893505895	nan
Z_91500_29	19929_TRA_Data	281	17/08/2015 (2)	21:04:34.190000	24.493	19929_TRA_Data, 9:04:34 PM (24.4 sec)	1.849	0.042	0.1793	0.0047	0.36327			0.0753	0.0014	0.45363	0.054	0.015	no value	NAN	1057	15	1061	25	1070	280	1041	37	-75	nan	-5	nan	-8	nan	65	nan	40	nan	201	nan	2	nan	5.57724	0.146197	-30	nan	283792397197210	nan
Z_91500_30	19930_TRA_Data	282	17/08/2015 (2)	21:05:57.270000	22.32	19930_TRA_Data, 9:05:57 PM (23.9 sec)	1.847	0.043	0.1781	0.0046	0.39619			0.0753	0.0014	0.43347	0.055	0.015	no value	NAN	1057	15	1055	26	1070	280	1039	38	-80	nan	-6	nan	-9	nan	65	nan	40	nan	204	nan	2	nan	5.61482	0.145021	-15	nan	284940416728717	nan
Z_91500_31	19949_TRA_Data	301	17/08/2015 (2)	21:36:58.320000	24.358	19949_TRA_Data, 9:36:58 PM (24.3 sec)	1.876	0.043	0.1806	0.0047	0.44237			0.0756	0.0014	0.32535	0.055	0.015	no value	NAN	1066	15	1069	26	1090	290	1049	37	-555	nan	-42	nan	-58	nan	62	nan	38	nan	192	nan	2	nan	5.5371	0.144099	-23	nan	271551752656335	nan
Z_91500_32	19950_TRA_Data	302	17/08/2015 (2)	21:38:23.150000	20.593	19950_TRA_Data, 9:38:22 PM (23.8 sec)	1.85	0.042	0.1807	0.0047	0.34583			0.0746	0.0014	0.4945	0.055	0.015	no value	NAN	1059	15	1070	26	1080	290	1023	37	-581	nan	-44	nan	-58	nan	62	nan	38	nan	192	nan	2	nan	5.53403	0.14394	-24	nan	274661501122061	nan
Z_91500_33	19969_TRA_Data	321	17/08/2015 (2)	22:05:00.890000	16.795	19969_TRA_Data, 10:04:53 PM (24.2 sec)	1.862	0.042	0.1808	0.0047	0.30147			0.0742	0.0014	0.47784	0.055	0.015	no value	NAN	1062	15	1070	26	1080	280	1007	39	554	nan	40	nan	59	nan	55	nan	35	nan	178	nan	2	nan	5.53097	0.143781	-36	nan	242445237295658	nan
Z_91500_34	19970_TRA_Data	322	17/08/2015 (2)	22:06:16.790000	23.888	19970_TRA_Data, 10:06:17 PM (23.8 sec)	1.864	0.042	0.1803	0.0047	0.38316			0.0752	0.0014	0.50608	0.055	0.015	no value	NAN	1063	15	1068	26	1080	280	1040	38	471	nan	37	nan	52	nan	60	nan	36	nan	186	nan	2	nan	5.54631	0.144579	-25	nan	264085617131845	nan
Z_91500_35	19989_TRA_Data	341	17/08/2015 (2)	22:32:53.600000	18.558	19989_TRA_Data, 10:32:49 PM (25 sec)	1.885	0.043	0.1814	0.0048	0.39641			0.0746	0.0013	0.41862	0.054	0.015	no value	NAN	1070	15	1074	26	1060	280	1027	37	299	nan	23	nan	31	nan	56	nan	35	nan	178	nan	2	nan	5.51268	0.14587	-27	nan	250165732428290	nan
Z_91500_36	19990_TRA_Data	342	17/08/2015 (2)	22:34:16.340000	19.689	19990_TRA_Data, 10:34:12 PM (25 sec)	1.903	0.043	0.1842	0.0048	0.40256			0.0743	0.0013	0.43183	0.053	0.014	no value	NAN	1077	15	1088	26	1050	280	1015	36	213	nan	17	nan	22	nan	59	nan	38	nan	188	nan	2	nan	5.42888	0.141469	-33	nan	265479821512065	nan
Z_91500_37	20009_TRA_Data	361	17/08/2015 (2)	23:00:46.720000	18.51	20009_TRA_Data, 11:00:42 PM (24.5 sec)	1.845	0.043	0.1792	0.0047	0.32294			0.0739	0.0014	0.43627	0.054	0.015	no value	NAN	1056	15	1061	26	1070	280	999	39	100	nan	8	nan	12	nan	60	nan	39	nan	195	nan	2	nan	5.58036	0.14636	-32	nan	265782227851298	nan
Z_91500_38	20010_TRA_Data	362	17/08/2015 (2)	23:02:08.210000	19.019	20010_TRA_Data, 11:02:06 PM (23.9 sec)	1.873	0.043	0.1818	0.0048	0.3189			0.0742	0.0014	0.50047	0.054	0.014	no value	NAN	1066	15	1076	26	1060	280	1011	39	75	nan	6	nan	8	nan	59	nan	38	nan	191	nan	2	nan	5.50055	0.145229	-23	nan	265258412477045	nan
		#VALUE!
Z722081_1	19655_TRA_Data	7	17/08/2015 (2)	14:43:37.750000	21.821	19655_TRA_Data, 2:43:36 PM (25.2 sec)	4.269	0.096	0.3059	0.0083	0.57487			0.1016	0.0017	0.51038	0.083	0.023	no value	NAN	1679	18	1716	41	1620	420	1635	32	40	nan	4	nan	14	nan	59	nan	116	nan	941	nan	1	nan	3.26904	0.0886991	-11	nan	522792971123320	nan
Z722081_2	19656_TRA_Data	8	17/08/2015 (2)	14:44:58.110000	23.597	19656_TRA_Data, 2:44:59 PM (23.9 sec)	2.98	0.066	0.2411	0.0064	0.58833			0.0899	0.0014	0.48475	0.069	0.019	no value	NAN	1398	17	1390	33	1350	350	1406	31	68	nan	6	nan	7	nan	153	nan	82	nan	541	nan	2	nan	4.14766	0.1101	-7	nan	880544870536877	nan
Z722081_3	19657_TRA_Data	9	17/08/2015 (2)	14:46:21.220000	23.344	19657_TRA_Data, 2:46:21 PM (26.1 sec)	3.547	0.076	0.2813	0.0074	0.60099			0.0921	0.0015	0.51157	0.078	0.021	no value	NAN	1533	17	1594	37	1520	390	1454	30	62	nan	6	nan	8	nan	145	nan	125	nan	931	nan	1	nan	3.55492	0.0935174	-14	nan	1018693577737140	nan
Z722081_4	19658_TRA_Data	10	17/08/2015 (2)	14:47:43.840000	25.837	19658_TRA_Data, 2:47:44 PM (25.8 sec)	1.942	0.043	0.1866	0.005	0.59556			0.0757	0.0013	0.48243	0.053	0.014	no value	NAN	1092	15	1102	27	1030	270	1062	34	20	nan	2	nan	4	nan	117	nan	138	nan	687	nan	1	nan	5.35906	0.143597	-23	nan	591376625714610	nan
Z722081_5	19659_TRA_Data	11	17/08/2015 (2)	14:49:10.230000	20.837	19659_TRA_Data, 2:49:06 PM (25.7 sec)	4.35	0.11	0.3065	0.0086	0.37465			0.1025	0.0021	0.48998	0.083	0.023	no value	NAN	1689	20	1725	42	1620	420	1626	40	0	nan	0	nan	0	nan	19	nan	47	nan	372	nan	0	nan	3.26264	0.0915456	-20	nan	181912738631687	nan
Z722081_6	19660_TRA_Data	12	17/08/2015 (2)	14:50:29.150000	25.534	19660_TRA_Data, 2:50:29 PM (25.5 sec)	0.3436	0.0096	0.041	0.0011	0.26807			0.0618	0.0015	0.34643	0.0141	0.0038	no value	NAN	297.8	7.3	259.1	7.1	284	76	577	51	10	nan	1	nan	2	nan	207	nan	188	nan	241	nan	1	nan	24.3902	0.654372	75	nan	216321019984770	nan
Z722081_7	19661_TRA_Data	13	17/08/2015 (2)	14:51:52.890000	23.786	19661_TRA_Data, 2:51:52 PM (24.9 sec)	4.98	0.12	0.3294	0.0092	0.55402			0.1101	0.002	0.45186	0.092	0.025	no value	NAN	1806	20	1834	44	1770	460	1771	34	6	nan	0	nan	-2	nan	34	nan	48	nan	408	nan	1	nan	3.03582	0.0847892	-8	nan	288683971529942	nan
Z722081_8	19662_TRA_Data	14	17/08/2015 (2)	14:53:27.490000	11.19	19662_TRA_Data, 2:53:14 PM (25 sec)	5.58	0.17	0.2564	0.0068	0.51014			0.1531	0.0037	-0.0064316	0.242	0.045	no value	NAN	1874	31	1469	35	4310	760	2298	53	146	nan	20	nan	42	nan	78	nan	46	nan	1085	nan	2	nan	3.90016	0.103436	33	nan	495897774007980	nan
Z722081_9	19663_TRA_Data	15	17/08/2015 (2)	14:54:34.780000	26.167	19663_TRA_Data, 2:54:36 PM (25.4 sec)	2.066	0.051	0.1962	0.0054	0.46234			0.0769	0.0016	0.39891	0.059	0.016	no value	NAN	1128	17	1151	29	1160	300	1067	43	0	nan	0	nan	0	nan	31	nan	46	nan	257	nan	1	nan	5.09684	0.14028	-3	nan	174457514916905	nan
Z722081_10	19664_TRA_Data	16	17/08/2015 (2)	14:55:58.030000	23.722	19664_TRA_Data, 2:55:59 PM (23.6 sec)	1.342	0.029	0.1372	0.0037	0.54549			0.071	0.0012	0.53656	0.052	0.014	no value	NAN	862	13	828	21	1020	270	935	34	14	nan	1	nan	1	nan	245	nan	109	nan	521	nan	2	nan	7.28863	0.196559	-7	nan	780898896452930	nan
Z722081_11	19665_TRA_Data	17	17/08/2015 (2)	14:57:20.830000	13.764	19665_TRA_Data, 2:57:21 PM (23.8 sec)	11.88	0.25	0.52	0.014	0.6106			0.169	0.0026	0.59367	0.14	0.038	no value	NAN	2587	20	2692	59	2640	680	2533	26	-124	nan	-23	nan	-15	nan	114	nan	66	nan	856	nan	2	nan	1.92308	0.0517751	-8	nan	1365507137871460	nan
Z722081_12	19666_TRA_Data	18	17/08/2015 (2)	14:58:43.790000	17.779	19666_TRA_Data, 2:58:44 PM (23.8 sec)	3.151	0.072	0.2534	0.0071	0.50466			0.0914	0.0016	0.52134	0.077	0.021	no value	NAN	1440	17	1451	36	1510	400	1435	33	16	nan	1	nan	1	nan	62	nan	41	nan	290	nan	2	nan	3.94633	0.110572	-12	nan	375723387006261	nan
Z722081_13	19667_TRA_Data	19	17/08/2015 (2)	15:00:05.760000	23.922	19667_TRA_Data, 3:00:06 PM (23.9 sec)	4.232	0.093	0.2982	0.008	0.57763			0.1027	0.0016	0.55509	0.089	0.024	no value	NAN	1676	18	1679	40	1720	440	1663	29	13	nan	1	nan	4	nan	138	nan	136	nan	1115	nan	1	nan	3.35345	0.0899652	-5	nan	1035119859275300	nan
Z722081_14	19668_TRA_Data	20	17/08/2015 (2)	15:01:28.290000	24.392	19668_TRA_Data, 3:01:28 PM (24.3 sec)	3.363	0.075	0.2603	0.007	0.52674			0.0938	0.0016	0.50827	0.082	0.022	no value	NAN	1492	17	1490	35	1590	410	1484	34	5	nan	0	nan	0	nan	77	nan	67	nan	503	nan	1	nan	3.84172	0.103312	-10	nan	507716047234262	nan
Z722081_15	19675_TRA_Data	27	17/08/2015 (2)	15:11:26.640000	20.043	19675_TRA_Data, 3:11:22 PM (24.8 sec)	3.401	0.074	0.2639	0.0073	0.53111			0.0928	0.0015	0.57198	0.08	0.022	no value	NAN	1503	17	1506	37	1560	410	1469	31	0	nan	0	nan	0	nan	149	nan	108	nan	787	nan	1	nan	3.78931	0.10482	-6	nan	976973741079806	nan
Z722081_16	19676_TRA_Data	28	17/08/2015 (2)	15:12:49.130000	17.021	19676_TRA_Data, 3:12:44 PM (25.5 sec)	1.579	0.036	0.1604	0.0044	0.54598			0.0709	0.0012	0.55639	0.048	0.013	no value	NAN	960	14	957	25	940	250	936	35	34	nan	3	nan	1	nan	272	nan	53	nan	228	nan	5	nan	6.23441	0.171019	-21	nan	964422257425491	nan
Z722081_17	19677_TRA_Data	29	17/08/2015 (2)	15:14:06.310000	24.37	19677_TRA_Data, 3:14:07 PM (23.8 sec)	1.555	0.034	0.1578	0.0042	0.61037			0.0715	0.0012	0.4891	0.05	0.013	no value	NAN	949	14	944	23	980	260	959	33	9	nan	1	nan	1	nan	220	nan	61	nan	269	nan	4	nan	6.33714	0.168669	0	nan	779690498805794	nan
Z722081_18	19678_TRA_Data	30	17/08/2015 (2)	15:15:28.980000	24.138	19678_TRA_Data, 3:15:29 PM (25.7 sec)	5.63	0.13	0.3525	0.0099	0.59114			0.1167	0.0021	0.39352	0.107	0.029	no value	NAN	1908	21	1937	47	2040	500	1877	32	-7	nan	0	nan	-1	nan	64	nan	46	nan	450	nan	1	nan	2.83688	0.0796741	-7	nan	486423516302025	nan
Z722081_19	19679_TRA_Data	31	17/08/2015 (2)	15:16:51.790000	22.48	19679_TRA_Data, 3:16:52 PM (23.8 sec)	2.958	0.065	0.2404	0.0064	0.58977			0.0893	0.0014	0.47323	0.075	0.02	no value	NAN	1391	17	1386	33	1460	380	1394	32	-36	nan	-3	nan	-4	nan	127	nan	79	nan	529	nan	2	nan	4.15973	0.110742	-6	nan	741334194791429	nan
Z722081_20	19680_TRA_Data	32	17/08/2015 (2)	15:18:13.320000	24.358	19680_TRA_Data, 3:18:13 PM (24.3 sec)	2.659	0.064	0.2264	0.0063	0.16664			0.0856	0.0017	0.19398	0.069	0.019	no value	NAN	1306	18	1312	33	1350	350	1277	38	-29	nan	-2	nan	-6	nan	47	nan	52	nan	326	nan	1	nan	4.41696	0.12291	-19	nan	281217715854294	nan
Z722081_21	19681_TRA_Data	33	17/08/2015 (2)	15:19:35.350000	19.379	19681_TRA_Data, 3:19:35 PM (25.3 sec)	0.874	0.021	0.1043	0.0029	0.52901			0.0622	0.0011	0.47531	0.0326	0.0088	no value	NAN	635	11	639	17	650	170	640	39	-75	nan	-5	nan	-18	nan	218	nan	270	nan	788	nan	1	nan	9.58773	0.266581	6	nan	614171051314815	nan
Z722081_22	19682_TRA_Data	34	17/08/2015 (2)	15:20:57.920000	24.762	19682_TRA_Data, 3:20:58 PM (24.7 sec)	0.819	0.019	0.1	0.0028	0.50366			0.0594	0.0011	0.48486	0.0343	0.0092	no value	NAN	605	11	614	16	680	180	546	41	-36	nan	-2	nan	-8	nan	151	nan	129	nan	400	nan	1	nan	10	0.28	50	nan	382380339620191	nan
Z722081_23	19683_TRA_Data	35	17/08/2015 (2)	15:22:25.190000	14.385	19683_TRA_Data, 3:22:21 PM (24.3 sec)	1.537	0.037	0.1605	0.0047	0.1689			0.0697	0.0013	0.5305	0.045	0.013	no value	NAN	941	14	958	25	880	250	885	39	-86	nan	-6	nan	-13	nan	113	nan	124	nan	492	nan	1	nan	6.23053	0.182452	-32	nan	478776734394872	nan
Z722081_24	19684_TRA_Data	36	17/08/2015 (2)	15:23:43.190000	24.493	19684_TRA_Data, 3:23:43 PM (24.4 sec)	0.432	0.013	0.0571	0.0016	0.09353			0.0556	0.0015	0.16513	0.0178	0.0048	no value	NAN	360.3	8.9	357.6	9.9	356	95	338	54	-10	nan	-1	nan	-1	nan	74	nan	56	nan	89	nan	1	nan	17.5131	0.490736	105	nan	104444208282745	nan
Z722081_25	19685_TRA_Data	37	17/08/2015 (2)	15:25:05.360000	21.722	19685_TRA_Data, 3:25:05 PM (24.3 sec)	2.979	0.067	0.2447	0.0065	0.52815			0.0886	0.0015	0.4518	0.072	0.019	no value	NAN	1396	17	1408	33	1410	360	1376	33	-59	nan	-6	nan	-7	nan	70	nan	50	nan	327	nan	1	nan	4.08664	0.108554	-11	nan	423255917864331	nan
Z722081_26	19686_TRA_Data	38	17/08/2015 (2)	15:26:28.250000	19.833	19686_TRA_Data, 3:26:28 PM (24.4 sec)	2.227	0.055	0.2031	0.0055	0.40313			0.0802	0.0017	0.46694	0.06	0.016	no value	NAN	1180	18	1190	30	1180	310	1149	43	-18	nan	-1	nan	-4	nan	32	nan	42	nan	225	nan	1	nan	4.92368	0.133335	-27	nan	179122799101924	nan
Z722081_27	19687_TRA_Data	39	17/08/2015 (2)	15:27:51.850000	22.83	19687_TRA_Data, 3:27:50 PM (24.8 sec)	6.82	0.15	0.386	0.01	0.56078			0.1274	0.0021	0.4782	0.108	0.029	no value	NAN	2082	20	2098	47	2060	540	2044	29	-66	nan	-9	nan	-9	nan	42	nan	36	nan	352	nan	1	nan	2.59067	0.0671159	-4	nan	379902220926879	nan
Z722081_28	19688_TRA_Data	40	17/08/2015 (2)	15:29:12.680000	24.997	19688_TRA_Data, 3:29:13 PM (24.9 sec)	0.784	0.021	0.0701	0.002	0.25961			0.082	0.0019	0.45757	0.0262	0.0071	no value	NAN	583	12	437	12	520	140	1161	48	-20	nan	-2	nan	-4	nan	100	nan	102	nan	236	nan	1	nan	14.2653	0.407	75	nan	186838630169470	nan
Z722081_29	19695_TRA_Data	47	17/08/2015 (2)	15:39:06.620000	24.056	19695_TRA_Data, 3:39:07 PM (24 sec)	3.502	0.074	0.2676	0.0069	0.54701			0.0945	0.0015	0.53307	0.079	0.021	no value	NAN	1524	16	1526	35	1530	400	1507	30	-235	nan	-22	nan	-43	nan	210	nan	230	nan	1644	nan	1	nan	3.73692	0.0963556	-5	nan	1490543829335200	nan
Z722081_30	19696_TRA_Data	48	17/08/2015 (2)	15:40:28.660000	24.022	19696_TRA_Data, 3:40:29 PM (24 sec)	18.75	0.41	0.605	0.016	0.62087			0.2233	0.0036	0.54258	0.172	0.046	no value	NAN	3022	21	3043	66	3200	800	2999	25	-156	nan	-35	nan	-36	nan	69	nan	101	nan	1581	nan	1	nan	1.65289	0.0437129	-3	nan	1244103181108620	nan
Z722081_31	19697_TRA_Data	49	17/08/2015 (2)	15:41:56.820000	18.861	19697_TRA_Data, 3:41:52 PM (23.6 sec)	0.609	0.013	0.0438	0.0012	0.39107			0.1001	0.0019	0.40057	0.0208	0.0053	no value	NAN	481.8	8.5	276.5	7.6	420	110	1601	39	105	nan	11	nan	18	nan	846	nan	516	nan	950	nan	2	nan	22.8311	0.625508	82	nan	897351888021778	nan
Z722081_32	19698_TRA_Data	50	17/08/2015 (2)	15:43:16.890000	21.793	19698_TRA_Data, 3:43:14 PM (24.9 sec)	0.738	0.019	0.0905	0.0024	0.23554			0.0592	0.0013	0.41034	0.0267	0.0072	no value	NAN	558	11	558	14	530	140	513	46	-25	nan	-2	nan	-11	nan	68	nan	176	nan	428	nan	0	nan	11.0497	0.293031	6	nan	208053749750424	nan
Z722081_33	19699_TRA_Data	51	17/08/2015 (2)	15:44:38.910000	22.766	19699_TRA_Data, 3:44:37 PM (25 sec)	3.709	0.081	0.2647	0.0071	0.6276			0.1012	0.0017	0.53657	0.079	0.021	no value	NAN	1569	17	1510	36	1540	400	1632	31	-241	nan	-25	nan	-62	nan	176	nan	243	nan	1774	nan	1	nan	3.77786	0.101333	5	nan	1286947969084070	nan
Z722081_34	19700_TRA_Data	52	17/08/2015 (2)	15:46:03.880000	13.558	19700_TRA_Data, 3:45:59 PM (25.9 sec)	2.188	0.055	0.1949	0.0054	0.80067			0.0806	0.0013	0.12953	0.058	0.015	no value	NAN	1166	18	1146	29	1130	280	1201	32	-291	nan	-23	nan	-23	nan	221	nan	106	nan	608	nan	3	nan	5.13084	0.142158	-4	nan	1014318332878640	nan
Z722081_35	19701_TRA_Data	53	17/08/2015 (2)	15:47:23.780000	20.901	19701_TRA_Data, 3:47:21 PM (24 sec)	4.19	0.12	0.2792	0.0076	0.33937			0.1081	0.0025	0.30828	0.092	0.027	no value	NAN	1663	19	1585	38	1770	480	1746	34	-140	nan	-16	nan	-22	nan	155	nan	154	nan	1299	nan	1	nan	3.58166	0.0974951	6	nan	1117942780912190	nan
Z722081_36	19702_TRA_Data	54	17/08/2015 (2)	15:48:48.360000	18.321	19702_TRA_Data, 3:48:43 PM (23.7 sec)	0.757	0.018	0.0917	0.0025	0.43677			0.0596	0.0011	0.42768	0.0291	0.0079	no value	NAN	570	10	565	15	580	160	550	42	-74	nan	-4	nan	-4	nan	155	nan	41	nan	109	nan	4	nan	10.9051	0.297304	-8	nan	317760934066444	nan
Z722081_37	19703_TRA_Data	55	17/08/2015 (2)	15:50:10.500000	19.181	19703_TRA_Data, 3:50:06 PM (23.8 sec)	3.123	0.076	0.2294	0.0064	0.42111			0.0986	0.002	0.55772	0.075	0.021	no value	NAN	1430	18	1331	34	1470	390	1553	38	-35	nan	-4	nan	-6	nan	57	nan	47	nan	318	nan	1	nan	4.3592	0.121617	8	nan	328672872605880	nan
Z722081_38	19704_TRA_Data	56	17/08/2015 (2)	15:51:32.040000	20.642	19704_TRA_Data, 3:51:29 PM (24.1 sec)	3.928	0.092	0.2823	0.0078	0.54425			0.1007	0.0018	0.49106	0.087	0.024	no value	NAN	1611	19	1599	40	1680	440	1615	34	-59	nan	-6	nan	-12	nan	43	nan	52	nan	412	nan	1	nan	3.54233	0.0978752	-4	nan	320822605812545	nan
Z722081_39	19705_TRA_Data	57	17/08/2015 (2)	15:52:50.690000	20.914	19705_TRA_Data, 3:52:51 PM (23.9 sec)	1.693	0.038	0.167	0.0046	0.60863			0.0741	0.0013	0.53498	0.053	0.014	no value	NAN	1002	14	993	25	1050	280	1015	35	-162	nan	-12	nan	-14	nan	252	nan	133	nan	643	nan	2	nan	5.98802	0.16494	-15	nan	1007640843825210	nan
Z722081_40	19706_TRA_Data	58	17/08/2015 (2)	15:54:16.020000	21.665	19706_TRA_Data, 3:54:13 PM (24.5 sec)	0.663	0.017	0.0834	0.0023	0.37208			0.0576	0.0012	0.44557	0.0272	0.0074	no value	NAN	514	10	516	14	540	140	470	46	-26	nan	-1	nan	-1	nan	104	nan	37	nan	91	nan	3	nan	11.9904	0.330671	80	nan	197030989752909	nan
Z722081_41	19707_TRA_Data	59	17/08/2015 (2)	15:55:37.820000	21.863	19707_TRA_Data, 3:55:35 PM (24.3 sec)	4.46	0.1	0.2976	0.0083	0.39268			0.1084	0.0019	0.33023	0.083	0.023	no value	NAN	1716	18	1678	41	1610	420	1749	30	-154	nan	-19	nan	-40	nan	118	nan	176	nan	1306	nan	1	nan	3.36022	0.0937157	2	nan	954084470361741	nan
Z722081_42	19708_TRA_Data	60	17/08/2015 (2)	15:56:56.670000	26.009	19708_TRA_Data, 3:56:58 PM (24.8 sec)	2.033	0.045	0.1955	0.0053	0.64778			0.0752	0.0012	0.40776	0.062	0.017	no value	NAN	1122	16	1149	28	1210	320	1060	34	-139	nan	-10	nan	-68	nan	195	nan	550	nan	3055	nan	0	nan	5.11509	0.13867	-28	nan	1315042399774440	nan
Z722081_43	19715_TRA_Data	67	17/08/2015 (2)	16:06:55.550000	25.133	19715_TRA_Data, 4:06:55 PM (25.9 sec)	4.68	0.1	0.3154	0.0084	0.61706			0.1076	0.0017	0.51199	0.09	0.024	no value	NAN	1759	18	1762	41	1740	450	1747	30	-286	nan	-31	nan	-64	nan	220	nan	275	nan	2229	nan	1	nan	3.17058	0.0844415	-3	nan	1774205173195050	nan
Z722081_44	19716_TRA_Data	68	17/08/2015 (2)	16:08:17.130000	14.503	19716_TRA_Data, 4:08:17 PM (23.5 sec)	4.71	0.13	0.268	0.0074	0.62071			0.1279	0.003	0.096348	0.111	0.03	no value	NAN	1747	23	1524	38	2120	540	2037	38	28	nan	4	nan	8	nan	31	nan	25	nan	256	nan	1	nan	3.73134	0.10303	22	nan	213018142433547	nan
Z722081_45	19717_TRA_Data	69	17/08/2015 (2)	16:09:40.040000	25.635	19717_TRA_Data, 4:09:40 PM (25.6 sec)	0.2794	0.007	0.0393	0.0011	0.38834			0.0528	0.0011	0.4527	0.0126	0.0034	no value	NAN	249.3	5.6	248.3	6.8	252	67	276	45	-32	nan	-2	nan	-6	nan	389	nan	343	nan	372	nan	1	nan	25.4453	0.712209	75	nan	371648830711724	nan
Z722081_46	19718_TRA_Data	70	17/08/2015 (2)	16:11:02.680000	24.997	19718_TRA_Data, 4:11:03 PM (24.9 sec)	10.69	0.23	0.476	0.012	0.65161			0.1631	0.0024	0.46446	0.125	0.034	no value	NAN	2491	20	2506	54	2370	600	2478	25	-183	nan	-30	nan	-26	nan	81	nan	77	nan	871	nan	1	nan	2.10084	0.0529624	-2	nan	1020034700396550	nan
Z722081_47	19719_TRA_Data	71	17/08/2015 (2)	16:12:29.750000	19.933	19719_TRA_Data, 4:12:25 PM (24.9 sec)	2.046	0.043	0.1844	0.0047	0.51998			0.0798	0.0012	0.53494	0.052	0.014	no value	NAN	1129	14	1090	26	1030	280	1178	29	-53	nan	-5	nan	-6	nan	256	nan	157	nan	747	nan	2	nan	5.42299	0.138222	3	nan	1150358491043010	nan
Z722081_48	19720_TRA_Data	72	17/08/2015 (2)	16:13:47.620000	25.064	19720_TRA_Data, 4:13:48 PM (25 sec)	3.252	0.069	0.2515	0.0067	0.59574			0.094	0.0015	0.60143	0.075	0.02	no value	NAN	1465	16	1444	34	1460	380	1497	30	-54	nan	-7	nan	-15	nan	482	nan	577	nan	3922	nan	1	nan	3.97614	0.105925	0	nan	3262484744462530	nan
Z722081_49	19721_TRA_Data	73	17/08/2015 (2)	16:15:14.450000	21.234	19721_TRA_Data, 4:15:10 PM (25.7 sec)	2.39	0.055	0.2158	0.0059	0.48986			0.0799	0.0014	0.49782	0.064	0.017	no value	NAN	1235	16	1258	31	1260	330	1174	35	-78	nan	-6	nan	-12	nan	98	nan	93	nan	546	nan	1	nan	4.63392	0.126692	-22	nan	550230052910670	nan
Z722081_50	19722_TRA_Data	74	17/08/2015 (2)	16:16:32.510000	21.221	19722_TRA_Data, 4:16:33 PM (26.1 sec)	0.502	0.023	0.0504	0.0015	0.2067			0.0745	0.0029	0.41915	0.0176	0.0051	no value	NAN	407	14	316.3	9.2	350	100	903	68	2	nan	0	nan	1	nan	68	nan	111	nan	177	nan	1	nan	19.8413	0.590514	83	nan	98417059574915	nan
Z722081_51	19723_TRA_Data	75	17/08/2015 (2)	16:17:59.430000	21.252	19723_TRA_Data, 4:17:55 PM (25.9 sec)	0.434	0.011	0.0579	0.0017	0.39508			0.0543	0.0011	0.42437	0.0183	0.005	no value	NAN	364.3	7.8	362	10	370	100	342	45	-34	nan	-2	nan	-9	nan	181	nan	241	nan	404	nan	1	nan	17.2712	0.507098	69	nan	287052089154534	nan
Z722081_52	19724_TRA_Data	76	17/08/2015 (2)	16:19:19.880000	21.804	19724_TRA_Data, 4:19:18 PM (23.8 sec)	6.44	0.15	0.355	0.01	0.5784			0.1315	0.0024	0.48794	0.107	0.029	no value	NAN	2033	21	1950	47	2040	520	2095	33	-40	nan	-5	nan	-3	nan	98	nan	51	nan	496	nan	2	nan	2.8169	0.0793493	5	nan	775781549238025	nan
Z722081_53	19725_TRA_Data	77	17/08/2015 (2)	16:20:43.110000	22.571	19725_TRA_Data, 4:20:40 PM (25.9 sec)	4.052	0.086	0.2931	0.0077	0.58057			0.1001	0.0016	0.5453	0.085	0.023	no value	NAN	1639	18	1655	39	1640	420	1613	29	-143	nan	-14	nan	-12	nan	159	nan	74	nan	567	nan	2	nan	3.41181	0.0896312	-6	nan	1089758228161020	nan
Z722081_54	19726_TRA_Data	78	17/08/2015 (2)	16:22:04.520000	12.413	19726_TRA_Data, 4:22:02 PM (25.4 sec)	1.627	0.04	0.1465	0.0044	0.59577			0.0817	0.0013	0.56377	0.061	0.016	no value	NAN	977	15	880	25	1190	310	1219	31	7	nan	0	nan	0	nan	535	nan	152	nan	831	nan	3	nan	6.82594	0.205011	21	nan	1758695644002010	nan
Z722081_55	19727_TRA_Data	79	17/08/2015 (2)	16:23:24.420000	17.828	19727_TRA_Data, 4:23:25 PM (24.8 sec)	3.42	0.22	0.2546	0.0071	0.5582			0.0997	0.0053	0.50657	0.081	0.031	no value	NAN	1504	32	1459	36	1580	540	1584	58	-12	nan	1	nan	2	nan	334	nan	262	nan	1909	nan	1	nan	3.92773	0.109532	-8	nan	2040088355341650	nan
Z722081_56	19728_TRA_Data	80	17/08/2015 (2)	16:24:48.250000	24.426	19728_TRA_Data, 4:24:48 PM (24.4 sec)	0.2749	0.0067	0.0387	0.0011	0.37297			0.0518	0.0011	0.4257	0.0123	0.0033	no value	NAN	246.1	5.4	244.9	6.5	247	66	242	44	-34	nan	-2	nan	-7	nan	266	nan	282	nan	318	nan	1	nan	25.8398	0.734464	29	nan	270344021527866	nan
Z722081_57	19735_TRA_Data	87	17/08/2015 (2)	16:34:42.520000	18.662	19735_TRA_Data, 4:34:43 PM (24.1 sec)	0.865	0.021	0.0983	0.0027	0.51924			0.0645	0.0012	0.55926	0.0319	0.0092	no value	NAN	632	11	604	15	630	180	732	35	-188	nan	-12	nan	-16	nan	616	nan	281	nan	824	nan	2	nan	10.1729	0.279419	-12	nan	1418623825057440	nan
Z722081_58	19736_TRA_Data	88	17/08/2015 (2)	16:36:06.110000	16.619	19736_TRA_Data, 4:36:06 PM (25.5 sec)	1.2	1.1	0.127	0.01	0.47777			0.071	0.017	0.39631	0.036	0.041	no value	NAN	802	90	767	53	710	660	920	120	-14	nan	-1	nan	-6	nan	74	nan	158	nan	517	nan	0	nan	7.87402	0.620001	-3	nan	296482335443677	nan
Z722081_59	19737_TRA_Data	89	17/08/2015 (2)	16:37:34.370000	19.31	19737_TRA_Data, 4:37:28 PM (25.4 sec)	3.571	0.08	0.254	0.007	0.6175			0.1009	0.0017	0.46574	0.073	0.02	no value	NAN	1536	18	1456	36	1420	370	1629	32	-86	nan	-9	nan	-13	nan	104	nan	89	nan	585	nan	1	nan	3.93701	0.1085	8	nan	661245431764728	nan
Z722081_60	19738_TRA_Data	90	17/08/2015 (2)	16:38:50.910000	25.77	19738_TRA_Data, 4:38:51 PM (25.7 sec)	1.704	0.042	0.171	0.005	0.53791			0.0733	0.0014	0.47469	0.052	0.014	no value	NAN	1003	16	1016	28	1020	270	976	40	-33	nan	-3	nan	-7	nan	116	nan	90	nan	428	nan	1	nan	5.84795	0.170993	-24	nan	505103095691943	nan
Z722081_61	19739_TRA_Data	91	17/08/2015 (2)	16:40:17.540000	20.144	19739_TRA_Data, 4:40:12 PM (25.2 sec)	3.631	0.088	0.2659	0.0073	0.71699			0.098	0.0016	0.25137	0.078	0.02	no value	NAN	1550	21	1517	37	1520	380	1566	34	-122	nan	-12	nan	-30	nan	121	nan	160	nan	1149	nan	1	nan	3.76081	0.103249	0	nan	872921207023458	nan
Z722081_62	19740_TRA_Data	92	17/08/2015 (2)	16:41:40.410000	20.266	19740_TRA_Data, 4:41:35 PM (25.2 sec)	0.577	0.013	0.0708	0.0019	0.52759			0.0586	0.0011	0.43774	0.0226	0.0062	no value	NAN	461.2	8.5	441	12	450	120	526	39	-82	nan	-5	nan	-11	nan	304	nan	211	nan	444	nan	1	nan	14.1243	0.379042	17	nan	524140834821498	nan
Z722081_63	19741_TRA_Data	93	17/08/2015 (2)	16:42:56.940000	25.736	19741_TRA_Data, 4:42:57 PM (25.7 sec)	15.05	0.33	0.542	0.015	0.62476			0.2023	0.0033	0.55036	0.142	0.038	no value	NAN	2815	21	2781	60	2680	680	2833	26	-157	nan	-33	nan	-40	nan	66	nan	98	nan	1276	nan	1	nan	1.84502	0.0510614	1	nan	1074226343881150	nan
Z722081_64	19742_TRA_Data	94	17/08/2015 (2)	16:44:19.730000	25.947	19742_TRA_Data, 4:44:20 PM (25.8 sec)	4.066	0.091	0.2748	0.0074	0.59886			0.1078	0.0018	0.42626	0.079	0.021	no value	NAN	1641	18	1562	37	1540	390	1744	31	-74	nan	-8	nan	-13	nan	96	nan	110	nan	808	nan	1	nan	3.63901	0.0979937	8	nan	694909972339145	nan
Z722081_65	19743_TRA_Data	95	17/08/2015 (2)	16:45:42.550000	25.131	19743_TRA_Data, 4:45:43 PM (25.1 sec)	0.595	0.015	0.076	0.0021	0.39932			0.0572	0.0012	0.39474	0.0239	0.0064	no value	NAN	471.4	9.4	472	13	480	130	447	44	-25	nan	-1	nan	-4	nan	134	nan	161	nan	347	nan	1	nan	13.1579	0.363573	137	nan	273201525744604	nan
Z722081_66	19744_TRA_Data	96	17/08/2015 (2)	16:47:04.580000	25.098	19744_TRA_Data, 4:47:05 PM (25 sec)	2.357	0.053	0.2102	0.0057	0.59693			0.0817	0.0014	0.39114	0.06	0.016	no value	NAN	1224	16	1227	30	1180	310	1218	33	-131	nan	-11	nan	-27	nan	179	nan	206	nan	1136	nan	1	nan	4.75737	0.129006	-17	nan	996335020837539	nan
Z722081_67	19745_TRA_Data	97	17/08/2015 (2)	16:48:26.710000	25.971	19745_TRA_Data, 4:48:27 PM (25.9 sec)	5.83	0.13	0.3511	0.0095	0.60992			0.1209	0.002	0.50275	0.102	0.027	no value	NAN	1946	19	1935	45	1960	500	1955	29	-137	nan	-17	nan	-37	nan	105	nan	154	nan	1455	nan	1	nan	2.84819	0.0770659	-2	nan	952217566057295	nan
Z722081_68	19746_TRA_Data	98	17/08/2015 (2)	16:49:53.160000	20.518	19746_TRA_Data, 4:49:50 PM (23.7 sec)	4.129	0.092	0.2844	0.0077	0.60265			0.1045	0.0018	0.47348	0.082	0.022	no value	NAN	1656	19	1611	39	1590	410	1692	32	-158	nan	-17	nan	-37	nan	117	nan	152	nan	1157	nan	1	nan	3.51617	0.0951988	2	nan	903143695829531	nan
Z722081_69	19747_TRA_Data	99	17/08/2015 (2)	16:51:14.320000	21.357	19747_TRA_Data, 4:51:12 PM (23.9 sec)	2.632	0.06	0.224	0.0062	0.53014			0.0846	0.0014	0.49244	0.065	0.018	no value	NAN	1306	17	1300	32	1280	340	1291	34	-165	nan	-14	nan	-22	nan	118	nan	96	nan	576	nan	1	nan	4.46429	0.123565	-8	nan	666603726198170	nan
Z722081_70	19748_TRA_Data	100	17/08/2015 (2)	16:52:33.720000	23.955	19748_TRA_Data, 4:52:34 PM (23.9 sec)	0.545	0.013	0.0707	0.0019	0.42454			0.0559	0.0011	0.43333	0.0219	0.0059	no value	NAN	440.6	8.7	440	12	440	120	413	44	-60	nan	-4	nan	-3	nan	175	nan	55	nan	112	nan	3	nan	14.1443	0.380115	48	nan	279549803424875	nan
Z722081_71	19755_TRA_Data	107	17/08/2015 (2)	17:02:28.570000	26.106	19755_TRA_Data, 5:02:29 PM (26.1 sec)	2.702	0.059	0.2283	0.0061	0.62404			0.0868	0.0014	0.49258	0.069	0.018	no value	NAN	1324	16	1324	32	1340	350	1338	30	-421	nan	-36	nan	-35	nan	309	nan	141	nan	907	nan	2	nan	4.3802	0.117036	-6	nan	1659985949392080	nan
Z722081_72	19756_TRA_Data	108	17/08/2015 (2)	17:03:50.760000	19.103	19756_TRA_Data, 5:03:51 PM (23.9 sec)	4.039	0.089	0.2885	0.0077	0.5201			0.1019	0.0017	0.46112	0.091	0.024	no value	NAN	1636	19	1629	38	1760	450	1643	31	-384	nan	-42	nan	-27	nan	224	nan	86	nan	729	nan	3	nan	3.4662	0.0925122	-7	nan	1441566101479430	nan
Z722081_73	19757_TRA_Data	109	17/08/2015 (2)	17:05:17.860000	19.82	19757_TRA_Data, 5:05:14 PM (24.1 sec)	2.055	0.044	0.1869	0.0051	0.58321			0.079	0.0013	0.62636	0.056	0.015	no value	NAN	1133	15	1104	27	1110	290	1156	32	-451	nan	-37	nan	-48	nan	311	nan	196	nan	1037	nan	2	nan	5.35046	0.146	-2	nan	1416346609977750	nan
Z722081_74	19758_TRA_Data	110	17/08/2015 (2)	17:06:40.160000	19.525	19758_TRA_Data, 5:06:35 PM (24.2 sec)	1.504	0.033	0.1508	0.0041	0.49066			0.0719	0.0012	0.47566	0.044	0.012	no value	NAN	929	13	904	23	870	240	962	35	-184	nan	-13	nan	-9	nan	158	nan	44	nan	184	nan	3	nan	6.6313	0.180294	-9	nan	539239517012511	nan
Z722081_75	19759_TRA_Data	111	17/08/2015 (2)	17:07:57.960000	23.72	19759_TRA_Data, 5:07:58 PM (23.7 sec)	2.068	0.052	0.1896	0.0054	0.51892			0.0797	0.0016	0.40769	0.062	0.017	no value	NAN	1129	17	1116	29	1220	320	1142	42	-49	nan	-4	nan	-8	nan	43	nan	39	nan	228	nan	1	nan	5.27426	0.150216	-17	nan	208356336514405	nan
Z722081_76	19760_TRA_Data	112	17/08/2015 (2)	17:09:23.890000	14.337	19760_TRA_Data, 5:09:21 PM (24 sec)	4.328	0.097	0.2969	0.0082	0.52789			0.1062	0.0018	0.48983	0.091	0.024	no value	NAN	1694	19	1672	41	1760	440	1710	33	-190	nan	-20	nan	-57	nan	96	nan	161	nan	1352	nan	1	nan	3.36814	0.0930237	-4	nan	800007324370132	nan
Z722081_77	19761_TRA_Data	113	17/08/2015 (2)	17:10:46.340000	22.34	19761_TRA_Data, 5:10:43 PM (25.9 sec)	2.4	0.056	0.2141	0.006	0.48516			0.0812	0.0015	0.48429	0.067	0.018	no value	NAN	1238	17	1248	32	1320	340	1199	36	-94	nan	-7	nan	-25	nan	80	nan	111	nan	697	nan	1	nan	4.67072	0.130893	-16	nan	474945949405470	nan
Z722081_78	19762_TRA_Data	114	17/08/2015 (2)	17:12:05.390000	16.196	19762_TRA_Data, 5:12:05 PM (24.2 sec)	6.06	0.15	0.3611	0.0097	0.58755			0.1231	0.0024	0.55325	0.101	0.03	no value	NAN	1979	21	1978	45	1950	530	1990	32	-163	nan	-19	nan	-31	nan	85	nan	96	nan	913	nan	1	nan	2.76932	0.0743904	-4	nan	736119657731985	nan
Z722081_79	19763_TRA_Data	115	17/08/2015 (2)	17:13:27.860000	23.821	19763_TRA_Data, 5:13:28 PM (23.8 sec)	0.595	0.016	0.0758	0.0022	0.39114			0.057	0.0013	0.49402	0.0251	0.0068	no value	NAN	469.5	9.9	470	13	500	130	436	47	-54	nan	-3	nan	-7	nan	122	nan	89	nan	209	nan	1	nan	13.1926	0.382899	98	nan	226997419623761	nan
Z722081_80	19764_TRA_Data	116	17/08/2015 (2)	17:14:52.970000	22.714	19764_TRA_Data, 5:14:51 PM (24.9 sec)	4.47	0.12	0.3005	0.0088	0.44676			0.1066	0.0017	0.090272	0.081	0.022	no value	NAN	1712	19	1690	42	1560	410	1729	26	-53	nan	-6	nan	-6	nan	81	nan	92	nan	673	nan	1	nan	3.32779	0.0974527	1	nan	620852892466907	nan
Z722081_81	19765_TRA_Data	117	17/08/2015 (2)	17:16:19.120000	18.562	19765_TRA_Data, 5:16:14 PM (23.8 sec)	1.655	0.04	0.147	0.0041	0.75042			0.081	0.0014	0.30335	0.06	0.016	no value	NAN	985	16	882	23	1180	300	1201	33	-165	nan	-14	nan	-11	nan	260	nan	71	nan	399	nan	4	nan	6.80272	0.189736	23	nan	842816730696487	nan
Z722081_82	19766_TRA_Data	118	17/08/2015 (2)	17:17:44.670000	15.008	19766_TRA_Data, 5:17:35 PM (24.2 sec)	1.007	0.024	0.0901	0.0026	0.29705			0.0813	0.0016	0.17055	0.0285	0.0077	no value	NAN	701	12	555	15	570	150	1182	37	-84	nan	-7	nan	-23	nan	142	nan	199	nan	531	nan	1	nan	11.0988	0.320275	47	nan	348880186705492	nan
Z722081_83	19767_TRA_Data	119	17/08/2015 (2)	17:19:03.440000	19.235	19767_TRA_Data, 5:18:59 PM (23.8 sec)	3.044	0.083	0.2172	0.0061	0.36744			0.1005	0.0023	0.22555	0.119	0.031	no value	NAN	1398	22	1265	32	2260	560	1564	46	-40	nan	-4	nan	-4	nan	44	nan	20	nan	238	nan	2	nan	4.60405	0.129303	4	nan	226254499810440	nan
Z722081_84	19768_TRA_Data	120	17/08/2015 (2)	17:20:24.020000	15.491	19768_TRA_Data, 5:20:21 PM (24.3 sec)	0.426	0.072	0.0504	0.0017	0.41629			0.0617	0.0064	0.38215	0.0175	0.008	no value	NAN	358	29	316	11	350	150	609	91	-69	nan	-4	nan	-13	nan	298	nan	303	nan	486	nan	1	nan	19.8413	0.669249	72	nan	386029169349818	nan
Z722081_85	19775_TRA_Data	127	17/08/2015 (2)	17:30:15.780000	19.778	19775_TRA_Data, 5:30:15 PM (24.4 sec)	1.544	0.034	0.1558	0.0042	0.62249			0.0723	0.0012	0.45535	0.047	0.013	no value	NAN	944	14	932	23	920	250	979	34	-128	nan	-10	nan	-64	nan	210	nan	540	nan	2356	nan	0	nan	6.41849	0.173027	-13	nan	1085700754758060	nan
Z722081_86	19776_TRA_Data	128	17/08/2015 (2)	17:31:37.950000	18.834	19776_TRA_Data, 5:31:38 PM (24.7 sec)	4.04	0.089	0.2841	0.0077	0.59031			0.1039	0.0017	0.57143	0.083	0.024	no value	NAN	1637	18	1609	39	1610	440	1678	30	-247	nan	-28	nan	-79	nan	225	nan	366	nan	2854	nan	1	nan	3.51989	0.0954	0	nan	1786389734069590	nan
Z722081_87	19777_TRA_Data	129	17/08/2015 (2)	17:32:58.820000	25.864	19777_TRA_Data, 5:33:00 PM (24.8 sec)	0.3751	0.0098	0.0411	0.0012	0.4241			0.0675	0.0015	0.45874	0.0151	0.004	no value	NAN	321	7.2	259.8	7.4	302	80	789	47	-17	nan	-1	nan	-6	nan	336	nan	559	nan	751	nan	1	nan	24.3309	0.710391	53	nan	401949219081591	nan
Z722081_88	19778_TRA_Data	130	17/08/2015 (2)	17:34:21.940000	23.46	19778_TRA_Data, 5:34:23 PM (24.7 sec)	1.985	0.052	0.1589	0.0045	0.11612			0.0927	0.0023	0.33117	0.046	0.013	no value	NAN	1098	18	948	25	910	240	1414	46	-3	nan	0	nan	-1	nan	30	nan	25	nan	105	nan	1	nan	6.29327	0.178223	20	nan	124666574383189	nan
Z722081_89	19779_TRA_Data	131	17/08/2015 (2)	17:35:47.100000	20.306	19779_TRA_Data, 5:35:45 PM (24.8 sec)	5.05	0.11	0.3301	0.009	0.54716			0.1106	0.0018	0.56775	0.094	0.026	no value	NAN	1822	18	1836	43	1820	470	1801	30	-186	nan	-21	nan	-24	nan	103	nan	78	nan	690	nan	1	nan	3.02938	0.0825946	-4	nan	789479352379293	nan
Z722081_90	19780_TRA_Data	132	17/08/2015 (2)	17:37:07.950000	24.728	19780_TRA_Data, 5:37:08 PM (24.7 sec)	1.856	0.053	0.1776	0.0062	0.50075			0.0781	0.0019	0.42391	0.056	0.015	no value	NAN	1053	19	1047	33	1100	290	1069	51	-82	nan	-7	nan	-12	nan	88	nan	66	nan	343	nan	1	nan	5.63063	0.196565	21	nan	355526941871295	nan
Z722081_91	19781_TRA_Data	133	17/08/2015 (2)	17:38:30.020000	24.661	19781_TRA_Data, 5:38:30 PM (24.6 sec)	3.299	0.075	0.2567	0.0071	0.54763			0.0936	0.0017	0.54256	0.078	0.021	no value	NAN	1476	18	1469	36	1520	390	1474	34	-127	nan	-12	nan	-16	nan	76	nan	51	nan	369	nan	1	nan	3.8956	0.107747	-16	nan	466331019529925	nan
Z722081_92	19782_TRA_Data	134	17/08/2015 (2)	17:39:52.460000	24.224	19782_TRA_Data, 5:39:52 PM (24.2 sec)	1.595	0.039	0.1608	0.0047	0.51619			0.0722	0.0014	0.53535	0.054	0.015	no value	NAN	962	15	958	26	1070	280	957	40	-111	nan	-8	nan	-3	nan	216	nan	43	nan	216	nan	6	nan	6.21891	0.181772	-11	nan	767702956957905	nan
Z722081_93	19783_TRA_Data	135	17/08/2015 (2)	17:41:15.590000	24.09	19783_TRA_Data, 5:41:16 PM (24 sec)	2.681	0.063	0.2269	0.0065	0.44432			0.0871	0.0017	0.5326	0.069	0.019	no value	NAN	1318	18	1313	34	1350	350	1326	40	-120	nan	-11	nan	-8	nan	74	nan	28	nan	181	nan	2	nan	4.40723	0.126254	-19	nan	375927291039072	nan
Z722081_94	19784_TRA_Data	136	17/08/2015 (2)	17:42:40.070000	21.608	19784_TRA_Data, 5:42:37 PM (24.6 sec)	3.717	0.083	0.2676	0.0074	0.59584			0.1001	0.0017	0.55417	0.082	0.022	no value	NAN	1569	17	1525	37	1580	410	1610	32	-136	nan	-14	nan	-34	nan	126	nan	186	nan	1404	nan	1	nan	3.73692	0.103338	2	nan	939268519283917	nan
Z722081_95	19785_TRA_Data	137	17/08/2015 (2)	17:44:05.810000	18.874	19785_TRA_Data, 5:44:00 PM (25 sec)	0.595	0.015	0.0658	0.0018	0.36514			0.0652	0.0013	0.49202	0.0198	0.0055	no value	NAN	472.6	9.2	411	11	400	110	746	40	-60	nan	-4	nan	-11	nan	215	nan	247	nan	458	nan	1	nan	15.1976	0.415739	71	nan	377480060298994	nan
Z722081_96	19786_TRA_Data	138	17/08/2015 (2)	17:45:26.110000	20.569	19786_TRA_Data, 5:45:22 PM (25 sec)	0.3277	0.0088	0.0452	0.0013	0.32089			0.0526	0.0012	0.36214	0.0141	0.0039	no value	NAN	286.2	6.7	284.6	8	282	78	264	47	-54	nan	-3	nan	-9	nan	179	nan	158	nan	207	nan	1	nan	22.1239	0.636307	85	nan	205881751131261	nan
Z722081_97	19787_TRA_Data	139	17/08/2015 (2)	17:47:01.340000	8.3407	19787_TRA_Data, 5:46:51 PM (18.4 sec)	1.37	0.12	0.0497	0.002	0.15231			0.1969	0.0087	0.26456	0.027	0.014	no value	NAN	867	33	313	12	540	260	2747	51	12	nan	3	nan	9	nan	94	nan	152	nan	398	nan	1	nan	20.1207	0.809687	88	nan	136937111729581	nan
Z722081_98	19788_TRA_Data	140	17/08/2015 (2)	17:48:10.560000	10	19788_TRA_Data, 5:48:08 PM (15.7 sec)	0.92	0.046	0.0834	0.003	0.44227			0.0827	0.0034	0.21582	0.094	0.025	no value	NAN	652	22	515	18	1790	460	1145	76	-7	nan	-1	nan	0	nan	28	nan	3	nan	28	nan	9	nan	11.9904	0.43131	60	nan	49213714855345	nan
Z722081_99	19795_TRA_Data	147	17/08/2015 (2)	17:58:08.440000	18.24	19795_TRA_Data, 5:58:03 PM (23.9 sec)	1.457	0.031	0.1405	0.0037	0.59778			0.0748	0.0013	0.49777	0.049	0.013	no value	NAN	910	13	848	21	970	240	1036	34	-179	nan	-14	nan	-65	nan	399	nan	745	nan	3281	nan	1	nan	7.11744	0.187434	12	nan	1681131539181650	nan
Z722081_100	19796_TRA_Data	148	17/08/2015 (2)	17:59:25.840000	25.837	19796_TRA_Data, 5:59:26 PM (25.8 sec)	0.534	0.016	0.0699	0.002	0.27589			0.0566	0.0015	0.38721	0.0225	0.0061	no value	NAN	430	10	435	12	450	120	387	57	-25	nan	-1	nan	-3	nan	49	nan	36	nan	75	nan	1	nan	14.3062	0.409332	124	nan	83929110135343	nan
Z722081_101	19797_TRA_Data	149	17/08/2015 (2)	18:00:52.020000	19.661	19797_TRA_Data, 6:00:48 PM (23.9 sec)	4.293	0.094	0.2914	0.0081	0.66559			0.1064	0.0017	0.55041	0.085	0.023	no value	NAN	1689	18	1646	40	1650	430	1726	30	-534	nan	-60	nan	-102	nan	267	nan	288	nan	2276	nan	1	nan	3.43171	0.0953907	3	nan	2022339609816570	nan
Z722081_102	19798_TRA_Data	150	17/08/2015 (2)	18:02:23.870000	10.807	19798_TRA_Data, 6:02:11 PM (23.9 sec)	3.845	0.089	0.2659	0.0072	0.62603			0.1038	0.0019	0.42574	0.082	0.021	no value	NAN	1597	20	1518	37	1600	390	1676	34	-191	nan	-20	nan	-25	nan	81	nan	66	nan	504	nan	1	nan	3.76081	0.101835	7	nan	538476304700448	nan
Z722081_103	19799_TRA_Data	151	17/08/2015 (2)	18:03:32.020000	24.661	19799_TRA_Data, 6:03:32 PM (24.6 sec)	2.094	0.047	0.1936	0.0054	0.53214			0.0789	0.0014	0.52021	0.06	0.016	no value	NAN	1144	16	1137	29	1170	310	1147	36	-274	nan	-22	nan	-30	nan	159	nan	97	nan	535	nan	2	nan	5.16529	0.144073	-13	nan	748002063607470	nan
Z722081_104	19800_TRA_Data	152	17/08/2015 (2)	18:04:59.200000	20.481	19800_TRA_Data, 6:04:55 PM (24.4 sec)	5.63	0.13	0.354	0.01	0.58721			0.1147	0.0021	0.4638	0.103	0.028	no value	NAN	1912	20	1946	48	1980	510	1852	33	-166	nan	-19	nan	-18	nan	57	nan	39	nan	365	nan	1	nan	2.82486	0.0797983	-8	nan	446127309686791	nan
Z722081_105	19801_TRA_Data	153	17/08/2015 (2)	18:06:22.220000	19.461	19801_TRA_Data, 6:06:17 PM (24.2 sec)	0.541	0.013	0.0704	0.002	0.42269			0.0557	0.0011	0.40544	0.0215	0.0059	no value	NAN	437.4	8.7	438	12	430	120	402	43	-166	nan	-9	nan	-36	nan	235	nan	291	nan	577	nan	1	nan	14.2045	0.403538	8	nan	447145910754831	nan
Z722081_106	19802_TRA_Data	154	17/08/2015 (2)	18:07:42.830000	20.846	19802_TRA_Data, 6:07:39 PM (24.4 sec)	1.672	0.038	0.1618	0.0043	0.43612			0.0749	0.0013	0.33239	0.052	0.013	no value	NAN	994	14	966	24	1010	250	1040	34	-316	nan	-24	nan	-16	nan	182	nan	56	nan	245	nan	3	nan	6.18047	0.164252	-4	nan	660975659771239	nan
Z722081_107	19803_TRA_Data	155	17/08/2015 (2)	18:09:02.190000	24.493	19803_TRA_Data, 6:09:02 PM (24.4 sec)	5.38	0.12	0.3372	0.0092	0.63652			0.1157	0.0019	0.49151	0.096	0.026	no value	NAN	1875	19	1868	44	1850	470	1876	30	-447	nan	-52	nan	-69	nan	123	nan	116	nan	1034	nan	1	nan	2.9656	0.080912	-3	nan	990163674781179	nan
Z722081_108	19804_TRA_Data	156	17/08/2015 (2)	18:10:24.540000	26.139	19804_TRA_Data, 6:10:25 PM (26.1 sec)	0.543	0.013	0.0672	0.0018	0.51966			0.0594	0.0011	0.37163	0.0213	0.0057	no value	NAN	438.2	8.5	419	11	420	110	536	41	-146	nan	-9	nan	-13	nan	230	nan	113	nan	222	nan	2	nan	14.881	0.398597	19	nan	363265090534824	nan
Z722081_109	19805_TRA_Data	157	17/08/2015 (2)	18:11:54.220000	18.46	19805_TRA_Data, 6:11:47 PM (25.2 sec)	4.168	0.093	0.292	0.0081	0.30338			0.1026	0.0017	0.34221	0.085	0.023	no value	NAN	1663	17	1649	39	1650	430	1657	30	-611	nan	-63	nan	-137	nan	168	nan	224	nan	1753	nan	1	nan	3.42466	0.0949991	-2	nan	1331768975203790	nan
Z722081_110	19806_TRA_Data	158	17/08/2015 (2)	18:13:15.740000	18.945	19806_TRA_Data, 6:13:10 PM (24.9 sec)	0.449	0.013	0.0486	0.0014	0.27014			0.0666	0.0017	0.31894	0.0173	0.0047	no value	NAN	372.4	9.3	305.9	8.7	346	94	727	57	-53	nan	-3	nan	-9	nan	120	nan	120	nan	188	nan	1	nan	20.5761	0.592728	74	nan	150818176842730	nan
Z722081_111	19807_TRA_Data	159	17/08/2015 (2)	18:14:38.010000	18.665	19807_TRA_Data, 6:14:31 PM (25.4 sec)	3.058	0.067	0.2349	0.0064	0.52093			0.0933	0.0015	0.54106	0.069	0.019	no value	NAN	1419	17	1360	33	1340	350	1482	31	-531	nan	-49	nan	-68	nan	207	nan	165	nan	1044	nan	1	nan	4.25713	0.115988	6	nan	1234998272910850	nan
Z722081_112	19808_TRA_Data	160	17/08/2015 (2)	18:15:54.310000	25.366	19808_TRA_Data, 6:15:54 PM (25.3 sec)	0.617	0.015	0.0784	0.0021	0.54996			0.0572	0.001	0.39508	0.025	0.0067	no value	NAN	485.5	9.1	486	13	500	130	468	40	-257	nan	-15	nan	-37	nan	261	nan	248	nan	566	nan	1	nan	12.7551	0.341655	28	nan	521840617327322	nan
Z722081_113	19815_TRA_Data	167	17/08/2015 (2)	18:25:51.170000	22.734	19815_TRA_Data, 6:25:51 PM (23.8 sec)	0.529	0.016	0.0647	0.0018	0.061555			0.06	0.0016	0.038813	0.0181	0.0049	no value	NAN	425.1	9.5	404	11	361	97	494	52	-78	nan	-4	nan	-12	nan	78	nan	91	nan	150	nan	1	nan	15.4559	0.429995	67	nan	134284000193975	nan
Z722081_114	19816_TRA_Data	168	17/08/2015 (2)	18:27:13.760000	23.922	19816_TRA_Data, 6:27:14 PM (23.9 sec)	0.504	0.012	0.0664	0.0019	0.63512			0.0554	0.001	0.45555	0.02	0.0054	no value	NAN	412.4	8.1	414	11	400	110	397	40	-403	nan	-23	nan	-56	nan	394	nan	303	nan	552	nan	1	nan	15.0602	0.430941	347	nan	645224600787994	nan
Z722081_115	19817_TRA_Data	169	17/08/2015 (2)	18:28:35.930000	15.088	19817_TRA_Data, 6:28:36 PM (20.8 sec)	1	0.062	0.0692	0.0028	0.12851			0.1158	0.0084	0.49762	0.032	0.011	no value	NAN	676	29	430	17	630	190	1510	110	-4	nan	0	nan	-1	nan	10	nan	10	nan	27	nan	1	nan	14.4509	0.584717	86	nan	17961628597977	nan
Z722081_116	19818_TRA_Data	170	17/08/2015 (2)	18:29:57.720000	24.963	19818_TRA_Data, 6:29:58 PM (24.9 sec)	1.732	0.04	0.168	0.0047	0.43225			0.0757	0.0014	0.35912	0.05	0.013	no value	NAN	1013	15	998	26	980	260	1048	36	-553	nan	-44	nan	-223	nan	247	nan	558	nan	2523	nan	0	nan	5.95238	0.166525	-16	nan	1339932368194280	nan
Z722081_117	19819_TRA_Data	171	17/08/2015 (2)	18:31:25.030000	19.653	19819_TRA_Data, 6:31:20 PM (24.4 sec)	0.709	0.018	0.0831	0.0024	0.26308			0.0616	0.0013	0.27435	0.0245	0.0067	no value	NAN	541	11	514	14	490	130	602	44	-187	nan	-12	nan	-91	nan	136	nan	381	nan	853	nan	0	nan	12.0337	0.347544	55	nan	391822582834359	nan
Z722081_118	19820_TRA_Data	172	17/08/2015 (2)	18:32:42.310000	26.374	19820_TRA_Data, 6:32:42 PM (26.3 sec)	2.501	0.054	0.2028	0.0054	0.49852			0.0906	0.0014	0.55516	0.058	0.016	no value	NAN	1268	16	1188	29	1150	300	1420	31	-1014	nan	-99	nan	-192	nan	489	nan	511	nan	2716	nan	1	nan	4.93097	0.131298	10	nan	2602321802839190	nan
Z722081_119	19821_TRA_Data	173	17/08/2015 (2)	18:34:10.430000	19.247	19821_TRA_Data, 6:34:06 PM (23.6 sec)	0.459	0.013	0.058	0.0017	0.040498			0.0574	0.0013	0.012998	0.0176	0.0048	no value	NAN	380.7	8.5	363	10	352	96	442	47	-134	nan	-8	nan	-36	nan	147	nan	236	nan	376	nan	1	nan	17.2414	0.505351	45	nan	245556760716764	nan
Z722081_120	19822_TRA_Data	174	17/08/2015 (2)	18:35:37.010000	16.674	19822_TRA_Data, 6:35:28 PM (25.4 sec)	1.078	0.028	0.0986	0.0026	0.18271			0.0788	0.0017	0.12226	0.084	0.023	no value	NAN	731	14	605	15	1600	410	1080	43	-49	nan	-4	nan	-3	nan	52	nan	8	nan	54	nan	7	nan	10.142	0.267436	37	nan	108208543743471	nan
Z722081_121	19823_TRA_Data	175	17/08/2015 (2)	18:36:51.010000	25.669	19823_TRA_Data, 6:36:51 PM (25.6 sec)	6.38	0.14	0.3577	0.0096	0.57733			0.1308	0.0021	0.50993	0.092	0.025	no value	NAN	2023	19	1966	45	1790	460	2090	29	-414	nan	-54	nan	-73	nan	79	nan	90	nan	753	nan	1	nan	2.79564	0.0750297	4	nan	716630938389145	nan
Z722081_122	19824_TRA_Data	176	17/08/2015 (2)	18:38:18.140000	20.541	19824_TRA_Data, 6:38:13 PM (25.7 sec)	0.929	0.021	0.073	0.0019	0.43266			0.0921	0.0016	0.26886	0.0251	0.0072	no value	NAN	665	11	454	11	500	140	1444	33	-136	nan	-12	nan	-27	nan	253	nan	284	nan	646	nan	1	nan	13.6986	0.35654	68	nan	490866304234034	nan
Z722081_123	19825_TRA_Data	177	17/08/2015 (2)	18:39:39.620000	22.06	19825_TRA_Data, 6:39:36 PM (25.5 sec)	1.071	0.025	0.1224	0.0034	0.47147			0.0634	0.0012	0.45027	0.043	0.011	no value	NAN	737	12	743	19	850	220	689	40	-270	nan	-17	nan	-30	nan	200	nan	124	nan	467	nan	2	nan	8.16994	0.226943	-18	nan	592620384791244	nan
Z722081_124	19826_TRA_Data	178	17/08/2015 (2)	18:40:59.160000	24.518	19826_TRA_Data, 6:40:58 PM (25.7 sec)	1.649	0.038	0.1273	0.0035	0.53026			0.0938	0.0015	0.4115	0.063	0.017	no value	NAN	985	15	771	20	1220	320	1490	33	-522	nan	-51	nan	-46	nan	407	nan	131	nan	750	nan	3	nan	7.85546	0.215979	44	nan	1182996896541600	nan
Z722081_125	19827_TRA_Data	179	17/08/2015 (2)	18:42:20.520000	25.156	19827_TRA_Data, 6:42:20 PM (25.9 sec)	3.629	0.093	0.2537	0.0072	0.49282			0.105	0.0022	0.39311	0.097	0.026	no value	NAN	1539	20	1457	37	1860	480	1669	39	-248	nan	-28	nan	-55	nan	91	nan	92	nan	754	nan	1	nan	3.94166	0.111864	5	nan	592792679029093	nan
Z722081_126	19828_TRA_Data	180	17/08/2015 (2)	18:43:48.070000	20.607	19828_TRA_Data, 6:43:43 PM (25.2 sec)	3.147	0.069	0.2505	0.0068	0.55875			0.091	0.0015	0.51724	0.075	0.02	no value	NAN	1441	17	1439	35	1460	380	1428	32	-377	nan	-35	nan	-62	nan	120	nan	115	nan	784	nan	1	nan	3.99202	0.108366	-5	nan	780615266410186	nan
Z722081_127	19835_TRA_Data	187	17/08/2015 (2)	18:53:45.400000	16.636	19835_TRA_Data, 6:53:40 PM (25.1 sec)	5.15	0.14	0.2876	0.0083	0.11633			0.1272	0.0033	0.10698	0.084	0.022	no value	NAN	1811	22	1624	42	1610	390	2007	41	-33	nan	-4	nan	-7	nan	23	nan	33	nan	228	nan	1	nan	3.47705	0.100346	16	nan	184045222514862	nan
Z722081_128	19836_TRA_Data	188	17/08/2015 (2)	18:55:05.720000	21.963	19836_TRA_Data, 6:55:02 PM (25.1 sec)	1.74	0.04	0.1701	0.0048	0.4329			0.0747	0.0014	0.5019	0.054	0.015	no value	NAN	1019	15	1011	26	1070	280	1024	38	-146	nan	-11	nan	-19	nan	93	nan	67	nan	329	nan	1	nan	5.87889	0.165895	-23	nan	390960497548242	nan
Z722081_129	19837_TRA_Data	189	17/08/2015 (2)	18:56:25.190000	24.493	19837_TRA_Data, 6:56:25 PM (24.4 sec)	2.521	0.058	0.2189	0.0059	0.53639			0.084	0.0015	0.39381	0.068	0.018	no value	NAN	1272	17	1275	31	1320	340	1260	36	-143	nan	-12	nan	-22	nan	67	nan	57	nan	343	nan	1	nan	4.5683	0.123129	-13	nan	373152369456859	nan
Z722081_130	19838_TRA_Data	190	17/08/2015 (2)	18:57:52.600000	21.08	19838_TRA_Data, 6:57:48 PM (26 sec)	1.967	0.044	0.1707	0.0048	0.46923			0.0832	0.0015	0.50275	0.053	0.015	no value	NAN	1100	15	1015	26	1050	280	1258	34	-263	nan	-22	nan	-79	nan	209	nan	344	nan	1658	nan	1	nan	5.85823	0.164731	12	nan	1039964778627380	nan
Z722081_131	19839_TRA_Data	191	17/08/2015 (2)	18:59:16.410000	17.266	19839_TRA_Data, 6:59:09 PM (24.2 sec)	3.666	0.083	0.2644	0.0073	0.46773			0.0998	0.0017	0.36626	0.075	0.02	no value	NAN	1559	18	1509	37	1450	380	1604	31	-606	nan	-62	nan	-194	nan	190	nan	377	nan	2549	nan	0	nan	3.78215	0.104424	4	nan	1540688448301990	nan
Z722081_132	19840_TRA_Data	192	17/08/2015 (2)	19:00:37.500000	19.182	19840_TRA_Data, 7:00:33 PM (24 sec)	0.581	0.015	0.0722	0.002	0.46314			0.0583	0.0012	0.4638	0.0237	0.0064	no value	NAN	464.1	9.5	449	12	470	130	505	44	-179	nan	-11	nan	-29	nan	205	nan	179	nan	380	nan	1	nan	13.8504	0.383668	37	nan	374343310463955	nan
Z722081_133	19841_TRA_Data	193	17/08/2015 (2)	19:02:02.050000	16.631	19841_TRA_Data, 7:01:57 PM (21.7 sec)	1.971	0.048	0.1772	0.0048	0.28089			0.0803	0.0016	0.46474	0.058	0.018	no value	NAN	1100	16	1050	26	1130	320	1166	40	-66	nan	-5	nan	-1	nan	41	nan	5	nan	28	nan	9	nan	5.64334	0.152867	-6	nan	162741038427655	nan
Z722081_134	19842_TRA_Data	194	17/08/2015 (2)	19:03:17.660000	16.196	19842_TRA_Data, 7:03:18 PM (24 sec)	1.918	0.052	0.1755	0.0046	0.26584			0.08	0.0017	0.47929	0.072	0.025	no value	NAN	1084	16	1041	25	1390	460	1175	38	-140	nan	-12	nan	-3	nan	106	nan	11	nan	69	nan	10	nan	5.69801	0.149349	-1	nan	405633754724197	nan
Z722081_135	19843_TRA_Data	195	17/08/2015 (2)	19:04:48.060000	15.616	19843_TRA_Data, 7:04:40 PM (24 sec)	3.76	0.079	0.2556	0.0067	0.59802			0.1055	0.0019	0.55015	0.077	0.022	no value	NAN	1580	18	1465	35	1500	410	1712	30	-585	nan	-63	nan	-91	nan	262	nan	245	nan	1703	nan	1	nan	3.91236	0.102554	13	nan	1747951117490430	nan
Z722081_136	19844_TRA_Data	196	17/08/2015 (2)	19:06:12.290000	13.388	19844_TRA_Data, 7:06:02 PM (23.7 sec)	2.386	0.056	0.194	0.0053	0.53136			0.0885	0.0017	0.56299	0.066	0.019	no value	NAN	1236	19	1141	29	1300	360	1374	37	-996	nan	-88	nan	-91	nan	424	nan	209	nan	1255	nan	2	nan	5.15464	0.140823	9	nan	1948739680978710	nan
Z722081_137	19845_TRA_Data	197	17/08/2015 (2)	19:07:28.670000	20.011	19845_TRA_Data, 7:07:25 PM (24 sec)	0.3077	0.0078	0.0415	0.0012	0.41419			0.0532	0.0011	0.39875	0.0134	0.0037	no value	NAN	271.5	6	262.2	7.3	269	73	308	44	-146	nan	-8	nan	-48	nan	323	nan	601	nan	725	nan	1	nan	24.0964	0.696763	113	nan	404633347022598	nan
Z722081_138	19846_TRA_Data	198	17/08/2015 (2)	19:08:49.530000	19.221	19846_TRA_Data, 7:08:47 PM (24.1 sec)	2.146	0.089	0.1259	0.0066	0.96843			0.1359	0.0044	0.91536	0.057	0.015	no value	NAN	1117	30	752	38	1110	280	2127	45	-295	nan	-33	nan	-76	nan	537	nan	523	nan	2235	nan	1	nan	7.94281	0.416382	61	nan	1252191319356730	nan
Z722081_139	19847_TRA_Data	199	17/08/2015 (2)	19:10:09.250000	25.434	19847_TRA_Data, 7:10:09 PM (25.4 sec)	0.373	0.012	0.0506	0.0016	0.38116			0.0548	0.0016	0.41492	0.0175	0.0047	no value	NAN	319.4	8.7	318.2	9.7	350	94	317	58	-47	nan	-2	nan	-7	nan	94	nan	82	nan	128	nan	1	nan	19.7629	0.624912	95	nan	118860160634597	nan
Z722081_140	19848_TRA_Data	200	17/08/2015 (2)	19:11:34.820000	20.865	19848_TRA_Data, 7:11:32 PM (23.5 sec)	0.3352	0.0088	0.0475	0.0013	0.32845			0.0516	0.0012	0.43199	0.0145	0.0039	no value	NAN	292.4	6.7	298.8	8.1	290	77	226	48	-82	nan	-3	nan	-17	nan	157	nan	231	nan	289	nan	1	nan	21.0526	0.576177	94	nan	206375188507749	nan
[truncated: 22 more columns]

## Sheet: 7230-5-U-3-40m
	Source file	DatAnalyse nr eTime	Date	Time	Duration(s)	Comments	Final207_235	Final207_235_Prop2SE	Final206_238	Final206_238_Prop2SE	ErrorCorrelation_6_38vs7_35	Final238_206	Final238_206_Prop2SE	Final207_206	Final207_206_Prop2SE	ErrorCorrelation_38_6vs7_6	Final208_232	Final208_232_Prop2SE	Final206_208	Final206_208_Prop2SE	FinalAge207_235	FinalAge207_235_Prop2SE	FinalAge206_238	FinalAge206_238_Prop2SE	FinalAge208_232	FinalAge208_232_Prop2SE	FinalAge207_206	FinalAge207_206_Prop2SE	Final206_204	Final206_204_Prop2SE	Final207_204	Final207_204_Prop2SE	Final208_204	Final208_204_Prop2SE	Approx_U_PPM	Approx_U_PPM_Prop2SE	Approx_Th_PPM	Approx_Th_PPM_Prop2SE	Approx_Pb_PPM	Approx_Pb_PPM_Prop2SE	FInal_U_Th_Ratio	FInal_U_Th_Ratio_Prop2SE	Final238_206	Final238_206_Prop2SE	FinalDiscPercent	FinalDiscPercent_Prop2SE	Dose	Dose_Prop2SE	PDP/histogram:
Z_GJ1_1	19515_TRA_Data	3	15/08/2015 (7)	11:57:04.940000	25.736	19515_TRA_Data, 11:57:05 AM (25.7 sec)	0.834	0.021	0.0992	0.0024	0.44114			0.06056	0.00096	0.46385	0	15	no value	NAN	614	11	610	14	0	290000	598	35	88	nan	5	nan	0	nan	305	nan	9	nan	27	nan	33	nan	10.0807	0.243887	4	nan	647301896137280	nan
Z_GJ1_2	19516_TRA_Data	4	15/08/2015 (7)	11:58:26.880000	25.803	19516_TRA_Data, 11:58:27 AM (25.8 sec)	0.826	0.02	0.0996	0.0024	0.35964			0.05975	0.00095	0.51322	0	14	no value	NAN	611	11	611	14	0	280000	565	35	52	nan	3	nan	0	nan	300	nan	9	nan	25	nan	33	nan	10.0402	0.241932	-14	nan	640888623321740	nan
Z_GJ1_3	19535_TRA_Data	23	15/08/2015 (7)	12:24:54.180000	20.502	19535_TRA_Data, 12:24:50 PM (24.5 sec)	0.815	0.02	0.0981	0.0024	0.36432			0.0603	0.00097	0.45294	0	15	no value	NAN	603	11	603	14	0	290000	585	35	-109	nan	-7	nan	-1	nan	284	nan	9	nan	25	nan	32	nan	10.1937	0.249387	-19	nan	595619227728195	nan
Z_GJ1_4	19536_TRA_Data	24	15/08/2015 (7)	12:26:12.620000	25.064	19536_TRA_Data, 12:26:13 PM (25 sec)	0.823	0.02	0.0994	0.0024	0.38883			0.06051	0.00099	0.49448	0	15	no value	NAN	608	11	610	14	0	280000	590	36	-73	nan	-5	nan	0	nan	298	nan	9	nan	24	nan	34	nan	10.0604	0.242906	-2	nan	628456667929251	nan
Z_GJ1_5	19555_TRA_Data	43	15/08/2015 (7)	12:52:35.750000	24.93	19555_TRA_Data, 12:52:36 PM (24.9 sec)	0.815	0.02	0.0987	0.0024	0.41937			0.06036	0.00097	0.50456	0	14	no value	NAN	603	11	607	14	0	280000	584	35	-137	nan	-9	nan	-1	nan	300	nan	9	nan	25	nan	34	nan	10.1317	0.246364	-11	nan	633443470231122	nan
Z_GJ1_6	19556_TRA_Data	44	15/08/2015 (7)	12:53:58.720000	24.963	19556_TRA_Data, 12:53:59 PM (24.9 sec)	0.818	0.02	0.0996	0.0024	0.42779			0.05999	0.00096	0.45215	0	15	no value	NAN	605	11	612	14	0	290000	571	35	-163	nan	-10	nan	-1	nan	300	nan	9	nan	25	nan	34	nan	10.0402	0.241932	-22	nan	637904449960567	nan
Z_GJ1_7	19575_TRA_Data	63	15/08/2015 (7)	13:20:22.320000	24.358	19575_TRA_Data, 1:20:22 PM (24.3 sec)	0.822	0.021	0.0994	0.0025	0.44939			0.06009	0.00098	0.44586	0	15	no value	NAN	608	12	611	14	0	290000	573	35	-191	nan	-12	nan	-1	nan	301	nan	9	nan	25	nan	33	nan	10.0604	0.253027	-12	nan	640306584072493	nan
Z_GJ1_8	19576_TRA_Data	64	15/08/2015 (7)	13:21:49.030000	19.237	19576_TRA_Data, 1:21:44 PM (24.3 sec)	0.81	0.02	0.0981	0.0024	0.30544			0.05979	0.00099	0.47361	0	14	no value	NAN	600	11	603	14	0	280000	560	36	-247	nan	-15	nan	-1	nan	284	nan	9	nan	24	nan	32	nan	10.1937	0.249387	-3	nan	593522638403094	nan
Z_GJ1_9	19595_TRA_Data	83	15/08/2015 (7)	13:48:08.730000	25.398	19595_TRA_Data, 1:48:09 PM (25.6 sec)	0.838	0.021	0.0998	0.0025	0.45101			0.06054	0.00099	0.45292	0	15	no value	NAN	616	12	613	14	0	290000	587	35	-271	nan	-17	nan	-1	nan	301	nan	9	nan	25	nan	34	nan	10.02	0.251003	-3	nan	641733668242278	nan
Z_GJ1_10	19596_TRA_Data	84	15/08/2015 (7)	13:49:31.210000	25.467	19596_TRA_Data, 1:49:31 PM (25.4 sec)	0.816	0.02	0.0995	0.0024	0.43828			0.05931	0.00097	0.51095	0	15	no value	NAN	605	11	611	14	0	280000	544	35	-293	nan	-18	nan	-1	nan	296	nan	9	nan	25	nan	33	nan	10.0503	0.242418	-9	nan	633192369423376	nan
Z_GJ1_11	19615_TRA_Data	103	15/08/2015 (7)	14:15:57.310000	25.366	19615_TRA_Data, 2:15:57 PM (25.3 sec)	0.822	0.021	0.0987	0.0024	0.44121			0.05993	0.00098	0.396	0	14	no value	NAN	607	12	606	14	0	280000	565	35	-299	nan	-18	nan	-1	nan	300	nan	9	nan	24	nan	33	nan	10.1317	0.246364	3	nan	632127970077238	nan
Z_GJ1_12	19616_TRA_Data	104	15/08/2015 (7)	14:17:19.150000	25.534	19616_TRA_Data, 2:17:19 PM (25.5 sec)	0.832	0.021	0.0994	0.0024	0.46344			0.06024	0.00096	0.44311	0	15	no value	NAN	612	11	611	14	0	290000	578	35	-307	nan	-19	nan	-1	nan	296	nan	9	nan	25	nan	32	nan	10.0604	0.242906	-19	nan	627601226416626	nan
Z_GJ1_13	19635_TRA_Data	123	15/08/2015 (7)	14:43:46.840000	25.837	19635_TRA_Data, 2:43:47 PM (25.8 sec)	0.826	0.021	0.0999	0.0024	0.41983			0.06001	0.00098	0.45075	0	15	no value	NAN	609	12	613	14	0	280000	572	36	-400	nan	-24	nan	-2	nan	296	nan	9	nan	25	nan	33	nan	10.01	0.240481	-21	nan	632125150179933	nan
Z_GJ1_14	19636_TRA_Data	124	15/08/2015 (7)	14:45:09.130000	24.546	19636_TRA_Data, 2:45:10 PM (23.9 sec)	0.81	0.02	0.098	0.0024	0.48767			0.05986	0.00097	0.38552	0	15	no value	NAN	601	12	602	14	0	290000	561	36	-366	nan	-22	nan	-2	nan	306	nan	9	nan	26	nan	34	nan	10.2041	0.249896	-8	nan	637310052133967	nan
Z_GJ1_15	19645_TRA_Data	133	15/08/2015 (7)	14:57:51.750000	24.93	19645_TRA_Data, 2:57:52 PM (24.9 sec)	0.829	0.021	0.099	0.0024	0.41509			0.06097	0.00098	0.49018	0	15	no value	NAN	611	12	608	14	0	290000	609	36	-421	nan	-26	nan	-2	nan	302	nan	9	nan	25	nan	34	nan	10.101	0.244873	-2	nan	638392540722942	nan
Z_GJ1_16	19646_TRA_Data	134	15/08/2015 (7)	14:59:14.380000	25.299	19646_TRA_Data, 2:59:14 PM (25.2 sec)	0.819	0.021	0.0992	0.0024	0.37649			0.0602	0.001	0.46975	0	15	no value	NAN	605	11	609	14	0	280000	577	35	-477	nan	-29	nan	-2	nan	301	nan	9	nan	25	nan	34	nan	10.0807	0.243887	-12	nan	636238079933082	nan
		#VALUE!
Z_Plesovice_1	19517_TRA_Data	5	15/08/2015 (7)	11:59:55.100000	17.422	19517_TRA_Data, 11:59:52 AM (25.6 sec)	0.3874	0.0097	0.0518	0.0012	0.5685			0.05352	0.00081	0.23686	0	7.7	no value	NAN	331.4	7.1	325.9	7.6	0	150000	330	34	82	nan	5	nan	2	nan	581	nan	98	nan	147	nan	6	nan	19.305	0.447221	36	nan	659774948357851	nan
Z_Plesovice_2	19518_TRA_Data	6	15/08/2015 (7)	12:01:13.840000	25.837	19518_TRA_Data, 12:01:14 PM (25.8 sec)	0.3838	0.0096	0.0517	0.0013	0.48227			0.05336	0.00082	0.34939	0	7.8	no value	NAN	329.2	7	324.5	7.7	0	150000	322	34	87	nan	5	nan	3	nan	601	nan	103	nan	154	nan	6	nan	19.3424	0.486365	59	nan	677787928144555	nan
Z_Plesovice_3	19537_TRA_Data	25	15/08/2015 (7)	12:27:40.650000	22.033	19537_TRA_Data, 12:27:38 PM (24.1 sec)	0.3749	0.0096	0.0512	0.0013	0.5094			0.05337	0.00086	0.32097	0	7.7	no value	NAN	323	7.2	321.7	7.7	0	150000	320	35	-92	nan	-5	nan	-3	nan	558	nan	92	nan	135	nan	6	nan	19.5312	0.495911	58	nan	623880304156073	nan
Z_Plesovice_4	19538_TRA_Data	26	15/08/2015 (7)	12:28:59.620000	24.056	19538_TRA_Data, 12:29:00 PM (24 sec)	0.3758	0.0094	0.0517	0.0013	0.41731			0.05301	0.00085	0.38453	0	7.5	no value	NAN	323.3	7	324.9	7.7	0	150000	306	36	-78	nan	-4	nan	-2	nan	575	nan	99	nan	141	nan	6	nan	19.3424	0.486365	54	nan	646718743481301	nan
Z_Plesovice_5	19557_TRA_Data	45	15/08/2015 (7)	12:55:24.360000	24.325	19557_TRA_Data, 12:55:24 PM (24.3 sec)	0.3795	0.0096	0.052	0.0013	0.48761			0.05309	0.00084	0.36215	0	7.6	no value	NAN	325.6	7	326.6	7.7	0	150000	308	35	-138	nan	-7	nan	-4	nan	555	nan	93	nan	139	nan	6	nan	19.2308	0.480769	23	nan	627443590049922	nan
Z_Plesovice_6	19558_TRA_Data	46	15/08/2015 (7)	12:56:49.240000	21.445	19558_TRA_Data, 12:56:46 PM (24.5 sec)	0.3965	0.0098	0.0545	0.0013	0.29195			0.05286	0.00084	0.41504	0	7.6	no value	NAN	338.4	7	341.9	7.9	0	150000	299	35	-164	nan	-9	nan	-5	nan	494	nan	88	nan	132	nan	6	nan	18.3486	0.437674	82	nan	592493648749832	nan
Z_Plesovice_7	19577_TRA_Data	65	15/08/2015 (7)	13:23:08.910000	16.203	19577_TRA_Data, 1:23:09 PM (25.7 sec)	0.402	0.011	0.0546	0.0013	0.31921			0.05327	0.00096	0.37072	0	7.3	no value	NAN	342	7.6	342.6	8.1	0	150000	316	40	-250	nan	-13	nan	-7	nan	599	nan	105	nan	145	nan	5	nan	18.315	0.436072	92	nan	716879701281046	nan
Z_Plesovice_8	19578_TRA_Data	66	15/08/2015 (7)	13:24:31.910000	13.658	19578_TRA_Data, 1:24:32 PM (25.7 sec)	0.397	0.01	0.0543	0.0014	0.27837			0.0533	0.001	0.4836	0	7.5	no value	NAN	338.8	7.6	340.8	8.3	0	150000	312	42	-250	nan	-14	nan	-8	nan	633	nan	111	nan	157	nan	6	nan	18.4162	0.474819	54	nan	755008759597447	nan
Z_Plesovice_9	19597_TRA_Data	85	15/08/2015 (7)	13:50:57.090000	15.656	19597_TRA_Data, 1:50:57 PM (24.5 sec)	0.3913	0.0098	0.0534	0.0013	0.341			0.05269	0.00083	0.37747	0	7.8	no value	NAN	334.4	7.1	335.4	7.9	0	150000	291	35	-311	nan	-17	nan	-9	nan	604	nan	104	nan	149	nan	6	nan	18.7266	0.455891	61	nan	708654527963312	nan
Z_Plesovice_10	19598_TRA_Data	86	15/08/2015 (7)	13:52:20.090000	24.594	19598_TRA_Data, 1:52:20 PM (24.5 sec)	0.3961	0.0098	0.0533	0.0013	0.25434			0.05324	0.00087	0.44287	0	7.8	no value	NAN	338	7.2	335	7.8	0	150000	314	36	-307	nan	-16	nan	-9	nan	521	nan	90	nan	133	nan	6	nan	18.7617	0.457603	-55	nan	607509464607478	nan
Z_Plesovice_11	19617_TRA_Data	105	15/08/2015 (7)	14:18:44.650000	25.03	19617_TRA_Data, 2:18:45 PM (25 sec)	0.3969	0.0098	0.0539	0.0013	0.33319			0.053	0.00084	0.39748	0	8.2	no value	NAN	339.2	7.2	338.3	7.8	0	160000	306	35	-292	nan	-16	nan	-9	nan	521	nan	90	nan	133	nan	6	nan	18.5529	0.447472	73	nan	614741030875532	nan
Z_Plesovice_12	19618_TRA_Data	106	15/08/2015 (7)	14:20:07.460000	24.224	19618_TRA_Data, 2:20:07 PM (24.2 sec)	0.3944	0.0098	0.0533	0.0013	0.29818			0.05331	0.00087	0.42618	0	8.1	no value	NAN	336.6	7.1	334.9	7.8	0	160000	314	36	-307	nan	-16	nan	-9	nan	529	nan	91	nan	137	nan	6	nan	18.7617	0.457603	28	nan	616331685235412	nan
Z_Plesovice_13	19637_TRA_Data	125	15/08/2015 (7)	14:46:34.880000	19.177	19637_TRA_Data, 2:46:35 PM (25.8 sec)	0.398	0.01	0.0549	0.0013	0.33377			0.05281	0.00085	0.38926	0	7.5	no value	NAN	339.5	7.2	344.2	8	0	150000	294	35	-378	nan	-20	nan	-11	nan	563	nan	96	nan	138	nan	6	nan	18.2149	0.431319	69	nan	676075238123810	nan
Z_Plesovice_14	19638_TRA_Data	126	15/08/2015 (7)	14:47:57.250000	25.434	19638_TRA_Data, 2:47:57 PM (25.4 sec)	0.4007	0.0098	0.0547	0.0013	0.29			0.05328	0.00084	0.44562	0	7.5	no value	NAN	341.5	7.2	343.1	7.9	0	150000	315	35	-420	nan	-23	nan	-12	nan	530	nan	93	nan	136	nan	6	nan	18.2815	0.434479	44	nan	634385382797382	nan
Z_Plesovice_15	19647_TRA_Data	135	15/08/2015 (7)	15:00:39.190000	18.175	19647_TRA_Data, 3:00:39 PM (24.4 sec)	0.393	0.0097	0.0536	0.0013	0.34852			0.05351	0.00085	0.40418	0	7.5	no value	NAN	335.6	7.1	336.5	7.8	0	150000	324	35	-503	nan	-27	nan	-15	nan	584	nan	100	nan	144	nan	6	nan	18.6567	0.452495	46	nan	686165596571542	nan
Z_Plesovice_16	19648_TRA_Data	136	15/08/2015 (7)	15:02:01.490000	19.722	19648_TRA_Data, 3:02:01 PM (24.1 sec)	0.3891	0.0097	0.0533	0.0013	0.30545			0.05307	0.00085	0.41689	0	7.9	no value	NAN	332.8	7.1	334.4	7.8	0	160000	308	35	-509	nan	-27	nan	-16	nan	584	nan	102	nan	153	nan	6	nan	18.7617	0.457603	57	nan	684949469513104	nan
		#VALUE!
Z_91500_1	19513_TRA_Data	1	15/08/2015 (7)	11:54:17.710000	22.581	19513_TRA_Data, 11:54:18 AM (25.9 sec)	1.969	0.053	0.1853	0.0047	0.062496			0.0768	0.0016	0.14747	0	25	no value	NAN	1094	18	1094	25	1000	480000	1048	39	35	nan	3	nan	4	nan	62	nan	39	nan	195	nan	2	nan	5.39665	0.136882	-32	nan	282820660365728	nan
Z_91500_2	19514_TRA_Data	2	15/08/2015 (7)	11:55:40.210000	23.31	19514_TRA_Data, 11:55:40 AM (25.4 sec)	1.904	0.05	0.1817	0.0045	0.34263			0.0755	0.0014	0.39972	0	25	no value	NAN	1075	18	1074	24	1000	470000	1034	38	32	nan	2	nan	4	nan	62	nan	40	nan	194	nan	2	nan	5.50358	0.136302	-33	nan	277377863281220	nan
Z_91500_3	19533_TRA_Data	21	15/08/2015 (7)	12:22:04.550000	25.131	19533_TRA_Data, 12:22:05 PM (25.1 sec)	1.875	0.05	0.183	0.0045	0.34623			0.0748	0.0014	0.5091	0	26	no value	NAN	1066	18	1082	25	1000	500000	1008	39	-27	nan	-2	nan	-3	nan	60	nan	38	nan	187	nan	2	nan	5.46448	0.134373	-24	nan	268233485013473	nan
Z_91500_4	19534_TRA_Data	22	15/08/2015 (7)	12:23:27.180000	25.501	19534_TRA_Data, 12:23:27 PM (25.5 sec)	1.896	0.05	0.1835	0.0046	0.29186			0.0757	0.0014	0.4684	0	27	no value	NAN	1072	17	1084	25	1000	510000	1030	39	-13	nan	-1	nan	-2	nan	59	nan	37	nan	189	nan	2	nan	5.44959	0.136611	-23	nan	265449441889598	nan
Z_91500_5	19553_TRA_Data	41	15/08/2015 (7)	12:49:49.230000	24.056	19553_TRA_Data, 12:49:50 PM (24 sec)	1.834	0.049	0.178	0.0045	0.28797			0.0755	0.0015	0.41426	0	26	no value	NAN	1051	18	1054	24	1000	510000	1029	41	-55	nan	-4	nan	-6	nan	61	nan	38	nan	195	nan	2	nan	5.61798	0.142028	-31	nan	265411146293167	nan
Z_91500_6	19554_TRA_Data	42	15/08/2015 (7)	12:51:11.720000	23.955	19554_TRA_Data, 12:51:12 PM (23.9 sec)	1.861	0.05	0.1805	0.0045	0.27641			0.0757	0.0015	0.45277	0	26	no value	NAN	1062	18	1068	25	1000	490000	1032	41	-76	nan	-6	nan	-9	nan	60	nan	38	nan	189	nan	2	nan	5.54017	0.138121	3	nan	265306105533286	nan
Z_91500_7	19573_TRA_Data	61	15/08/2015 (7)	13:17:37.020000	24.661	19573_TRA_Data, 1:17:37 PM (24.6 sec)	1.875	0.049	0.1808	0.0045	0.27693			0.0757	0.0014	0.46846	0	27	no value	NAN	1066	18	1070	25	1000	510000	1038	40	-69	nan	-5	nan	-7	nan	60	nan	38	nan	195	nan	2	nan	5.53097	0.137662	-25	nan	264478453830681	nan
Z_91500_8	19574_TRA_Data	62	15/08/2015 (7)	13:19:02.350000	22.329	19574_TRA_Data, 1:18:59 PM (26.1 sec)	1.918	0.052	0.184	0.0046	0.21271			0.0763	0.0016	0.47739	0	26	no value	NAN	1079	18	1087	25	1000	500000	1042	42	-79	nan	-6	nan	-8	nan	56	nan	37	nan	180	nan	1	nan	5.43478	0.13587	-30	nan	250552022453096	nan
Z_91500_9	19593_TRA_Data	81	15/08/2015 (7)	13:45:24.030000	23.653	19593_TRA_Data, 1:45:24 PM (23.6 sec)	1.85	0.05	0.1789	0.0045	0.24535			0.0755	0.0015	0.46548	0	27	no value	NAN	1057	18	1059	25	1000	510000	1019	42	-93	nan	-7	nan	-10	nan	61	nan	38	nan	197	nan	2	nan	5.58971	0.140602	-29	nan	263737681756815	nan
Z_91500_10	19594_TRA_Data	82	15/08/2015 (7)	13:46:45.250000	24.426	19594_TRA_Data, 1:46:45 PM (24.4 sec)	1.878	0.05	0.1812	0.0045	0.28318			0.075	0.0015	0.44366	0	26	no value	NAN	1066	18	1072	24	1000	500000	1019	40	-101	nan	-8	nan	-11	nan	60	nan	37	nan	189	nan	2	nan	5.51876	0.137055	-34	nan	262708463762458	nan
Z_91500_11	19613_TRA_Data	101	15/08/2015 (7)	14:13:11.860000	23.821	19613_TRA_Data, 2:13:12 PM (23.8 sec)	1.861	0.051	0.1781	0.0045	0.25256			0.0756	0.0015	0.43419	0	28	no value	NAN	1059	18	1055	24	1000	530000	1027	43	-102	nan	-8	nan	-11	nan	61	nan	38	nan	193	nan	2	nan	5.61482	0.141868	17	nan	262409652363009	nan
Z_91500_12	19614_TRA_Data	102	15/08/2015 (7)	14:14:34.460000	25.22	19614_TRA_Data, 2:14:34 PM (25.8 sec)	1.907	0.05	0.1849	0.0047	0.25846			0.075	0.0015	0.51656	0	28	no value	NAN	1076	18	1092	25	1000	530000	1009	41	-118	nan	-9	nan	-13	nan	59	nan	37	nan	190	nan	2	nan	5.40833	0.137475	-7	nan	264418406729958	nan
Z_91500_13	19633_TRA_Data	121	15/08/2015 (7)	14:41:00.950000	18.762	19633_TRA_Data, 2:41:01 PM (24.7 sec)	1.867	0.05	0.1804	0.0046	0.26279			0.0753	0.0015	0.50697	0	26	no value	NAN	1063	18	1068	25	1000	490000	1026	41	-140	nan	-11	nan	-15	nan	64	nan	41	nan	201	nan	2	nan	5.54324	0.141346	-12	nan	286099290989326	nan
Z_91500_14	19634_TRA_Data	122	15/08/2015 (7)	14:42:23.050000	23.651	19634_TRA_Data, 2:42:23 PM (24.7 sec)	1.885	0.051	0.1829	0.0046	0.33207			0.0751	0.0015	0.42839	0	26	no value	NAN	1067	18	1081	25	1000	490000	1018	41	-142	nan	-11	nan	-15	nan	59	nan	38	nan	191	nan	2	nan	5.46747	0.137509	-17	nan	265266676838318	nan
Z_91500_15	19643_TRA_Data	131	15/08/2015 (7)	14:55:05.410000	22.03	19643_TRA_Data, 2:55:05 PM (25.2 sec)	1.868	0.051	0.1822	0.0046	0.29161			0.0748	0.0015	0.4518	0	26	no value	NAN	1061	18	1077	25	1000	500000	1020	41	-173	nan	-13	nan	-20	nan	63	nan	40	nan	204	nan	2	nan	5.48847	0.138567	5	nan	280814944922984	nan
Z_91500_16	19644_TRA_Data	132	15/08/2015 (7)	14:56:27.690000	16.284	19644_TRA_Data, 2:56:28 PM (23.9 sec)	1.883	0.051	0.1797	0.0045	0.30704			0.0766	0.0015	0.44578	0	26	no value	NAN	1070	18	1065	25	1000	500000	1068	41	-183	nan	-14	nan	-20	nan	68	nan	42	nan	214	nan	2	nan	5.56483	0.139353	-14	nan	296430977954039	nan
		#VALUE!
Z72305U1_1	19519_TRA_Data	7	15/08/2015 (7)	12:02:43.380000	25.299	19519_TRA_Data, 12:02:43 PM (25.2 sec)	0.315	0.0084	0.0432	0.0011	0.248			0.0526	0.001	0.40225	0	7	no value	NAN	277	6.4	272.3	6.5	0	140000	272	41	32	nan	2	nan	5	nan	305	nan	224	nan	302	nan	1	nan	23.1482	0.58942	116	nan	324468272989211	nan
Z72305U1_2	19521_TRA_Data	9	15/08/2015 (7)	12:05:29.020000	24.661	19521_TRA_Data, 12:05:29 PM (24.6 sec)	0.332	0.011	0.0458	0.0012	0.13525			0.0531	0.0015	0.46796	0	7.5	no value	NAN	288.4	8.3	288.3	7.4	0	150000	244	56	4	nan	0	nan	2	nan	100	nan	195	nan	281	nan	0	nan	21.8341	0.572071	92	nan	139120977826262	nan
Z72305U1_3	19522_TRA_Data	10	15/08/2015 (7)	12:06:51.720000	19.878	19522_TRA_Data, 12:06:52 PM (24.9 sec)	0.512	0.015	0.0653	0.0017	0.27844			0.0569	0.0013	0.38812	0	11	no value	NAN	417	10	408	10	0	220000	423	49	13	nan	1	nan	2	nan	151	nan	94	nan	200	nan	2	nan	15.3139	0.398678	75	nan	239433553051144	nan
Z72305U1_4	19523_TRA_Data	11	15/08/2015 (7)	12:08:13.110000	20.175	19523_TRA_Data, 12:08:13 PM (25.5 sec)	0.3294	0.0092	0.0453	0.0011	0.26539			0.0526	0.0011	0.40797	0	7.1	no value	NAN	287.8	7	285.7	7.1	0	140000	272	44	7	nan	0	nan	4	nan	267	nan	1007	nan	1384	nan	0	nan	22.0751	0.536039	59	nan	478480491123778	nan
Z72305U1_5	19524_TRA_Data	12	15/08/2015 (7)	12:09:36.110000	25.568	19524_TRA_Data, 12:09:36 PM (25.5 sec)	5.38	0.12	0.3405	0.0081	0.57499			0.1141	0.0015	0.58923	0	50	no value	NAN	1878	20	1886	39	2000	910000	1855	23	70	nan	6	nan	7	nan	212	nan	126	nan	1214	nan	2	nan	2.93686	0.0698636	-3	nan	1666778396009450	nan
Z72305U1_6	19526_TRA_Data	14	15/08/2015 (7)	12:12:28.990000	16.682	19526_TRA_Data, 12:12:21 PM (24.6 sec)	0.539	0.013	0.0633	0.0015	0.5226			0.06135	0.00094	0.35777	0	13	no value	NAN	437.4	9	395.4	9.4	0	260000	633	34	189	nan	12	nan	15	nan	987	nan	281	nan	729	nan	3	nan	15.7978	0.374355	23	nan	1405948455077850	nan
Z72305U1_7	19527_TRA_Data	15	15/08/2015 (7)	12:13:42.850000	13.888	19527_TRA_Data, 12:13:43 PM (24.8 sec)	5.01	0.14	0.3198	0.0091	0.47013			0.1147	0.0024	0.50866	0	53	no value	NAN	1813	24	1786	45	2000	960000	1844	37	12	nan	2	nan	2	nan	62	nan	49	nan	493	nan	1	nan	3.12695	0.0889784	0	nan	468048364047813	nan
Z72305U1_8	19528_TRA_Data	16	15/08/2015 (7)	12:15:04.070000	9.9782	19528_TRA_Data, 12:15:05 PM (25.3 sec)	0.421	0.011	0.0435	0.0012	0.29047			0.0711	0.0015	0.57327	-40000	1900000	no value	NAN	356.6	8.2	274.2	7.3	no value	NAN	933	44	200	nan	14	nan	129	nan	1346	nan	0	nan	5178	nan	-91391	nan	22.9885	0.634166	65	nan	1238613294639730	nan
Z72305U1_9	19530_TRA_Data	18	15/08/2015 (7)	12:17:56.480000	19.197	19530_TRA_Data, 12:17:50 PM (25.6 sec)	0.2283	0.0059	0.03162	0.00078	0.32453			0.05265	0.00096	0.43334	0	5.4	no value	NAN	208.6	5	200.6	4.9	0	110000	284	40	-23	nan	-1	nan	-2	nan	710	nan	359	nan	372	nan	2	nan	31.6256	0.780137	90	nan	524413266069579	nan
Z72305U1_10	19531_TRA_Data	19	15/08/2015 (7)	12:19:15.500000	22.183	19531_TRA_Data, 12:19:13 PM (24.9 sec)	5.8	0.14	0.3509	0.0083	0.51894			0.1199	0.0016	0.51667	0	53	no value	NAN	1944	20	1937	40	2000	960000	1944	24	-132	nan	-16	nan	-22	nan	196	nan	187	nan	1877	nan	1	nan	2.84981	0.067408	-1	nan	1718433126764250	nan
Z72305U1_11	19532_TRA_Data	20	15/08/2015 (7)	12:20:35.180000	25.501	19532_TRA_Data, 12:20:35 PM (25.5 sec)	0.469	0.014	0.0621	0.0016	0.14692			0.0554	0.0014	0.42398	0	9.5	no value	NAN	387.5	9.9	387.9	9.5	0	190000	349	52	-13	nan	-1	nan	-2	nan	91	nan	93	nan	170	nan	1	nan	16.1031	0.414894	91	nan	147262736212217	nan
Z72305U1_12	19539_TRA_Data	27	15/08/2015 (7)	12:30:29.190000	24.493	19539_TRA_Data, 12:30:29 PM (24.4 sec)	0.2598	0.007	0.0369	0.0009	0.03037			0.0514	0.001	0.085943	0	6	no value	NAN	233.5	5.6	233.5	5.6	0	120000	218	40	-34	nan	-2	nan	-5	nan	344	nan	255	nan	291	nan	1	nan	27.1003	0.660982	78	nan	311507663471540	nan
Z72305U1_13	19540_TRA_Data	28	15/08/2015 (7)	12:31:57.490000	19.189	19540_TRA_Data, 12:31:51 PM (25.1 sec)	0.2394	0.0071	0.03427	0.00091	0.40109			0.051	0.0011	0.31316	0	5.7	no value	NAN	217.4	5.8	217.1	5.6	0	110000	205	46	-19	nan	-1	nan	-2	nan	372	nan	211	nan	238	nan	2	nan	29.18	0.774842	86	nan	304910835232528	nan
Z72305U1_14	19542_TRA_Data	30	15/08/2015 (7)	12:34:36.250000	25.434	19542_TRA_Data, 12:34:36 PM (25.4 sec)	0.2669	0.0085	0.03823	0.00097	0.16426			0.0515	0.0014	0.37607	0	6.2	no value	NAN	238.2	6.8	241.7	6	0	120000	194	54	-16	nan	-1	nan	-3	nan	146	nan	130	nan	153	nan	1	nan	26.1575	0.663687	103	nan	141188584799819	nan
Z72305U1_15	19543_TRA_Data	31	15/08/2015 (7)	12:35:58.810000	25.87	19543_TRA_Data, 12:35:59 PM (25.8 sec)	0.2839	0.0074	0.04021	0.00098	0.21416			0.0517	0.00098	0.47636	0	6.5	no value	NAN	252.8	5.8	254.1	6.1	0	130000	241	40	-56	nan	-3	nan	-7	nan	370	nan	214	nan	263	nan	2	nan	24.8694	0.606119	98	nan	354192501790152	nan
Z72305U1_16	19544_TRA_Data	32	15/08/2015 (7)	12:37:20.680000	26.005	19544_TRA_Data, 12:37:21 PM (26 sec)	3.173	0.077	0.2559	0.0062	0.42819			0.0908	0.0014	0.49743	0	39	no value	NAN	1446	19	1467	32	2000	720000	1419	29	-117	nan	-11	nan	-24	nan	107	nan	118	nan	864	nan	1	nan	3.90778	0.0946784	-8	nan	732737294437551	nan
Z72305U1_17	19545_TRA_Data	33	15/08/2015 (7)	12:38:43.840000	25.837	19545_TRA_Data, 12:38:44 PM (25.8 sec)	0.314	0.01	0.045	0.0012	0.12755			0.0522	0.0015	0.47062	0	7.2	no value	NAN	274.7	7.9	283.2	7.3	0	140000	205	58	-19	nan	-1	nan	-4	nan	100	nan	115	nan	157	nan	1	nan	22.2222	0.592593	98	nan	119328385753270	nan
Z72305U1_18	19546_TRA_Data	34	15/08/2015 (7)	12:40:05.290000	24.392	19546_TRA_Data, 12:40:05 PM (24.3 sec)	0.2721	0.0079	0.03864	0.00098	0.20499			0.0518	0.0012	0.39689	0	6.1	no value	NAN	243.1	6.3	244.3	6.1	0	120000	225	47	-49	nan	-3	nan	-8	nan	267	nan	239	nan	280	nan	1	nan	25.8799	0.656375	85	nan	268677384672983	nan
Z72305U1_19	19548_TRA_Data	36	15/08/2015 (7)	12:42:50.190000	24.493	19548_TRA_Data, 12:42:50 PM (24.4 sec)	0.2346	0.0066	0.0334	0.00083	0.27474			0.0515	0.0011	0.35634	0	5.3	no value	NAN	213.1	5.4	211.7	5.1	0	110000	219	44	-36	nan	-2	nan	-5	nan	297	nan	216	nan	220	nan	1	nan	29.9401	0.744021	105	nan	244396253584397	nan
Z72305U1_20	19549_TRA_Data	37	15/08/2015 (7)	12:44:12.460000	24.224	19549_TRA_Data, 12:44:12 PM (24.2 sec)	0.493	0.013	0.0651	0.0016	0.30827			0.05532	0.00097	0.44316	0	11	no value	NAN	405.5	8.6	407.1	9.7	0	220000	389	39	-89	nan	-5	nan	-8	nan	283	nan	117	nan	250	nan	2	nan	15.361	0.377536	56	nan	423192107515721	nan
Z72305U1_21	19550_TRA_Data	38	15/08/2015 (7)	12:45:34.850000	17.587	19550_TRA_Data, 12:45:35 PM (24.8 sec)	4.51	0.11	0.2468	0.0061	0.69904			0.1334	0.0018	0.53321	0	34	no value	NAN	1729	20	1420	32	1000	640000	2133	24	167	nan	24	nan	44	nan	918	nan	1512	nan	9968	nan	1	nan	4.05186	0.100147	33	nan	6696724442757400	nan
Z72305U1_22	19551_TRA_Data	39	15/08/2015 (7)	12:46:56.820000	24.862	19551_TRA_Data, 12:46:57 PM (24.8 sec)	0.364	0.01	0.0505	0.0012	0.15319			0.0531	0.0011	0.41391	0	8	no value	NAN	314.1	7.5	317.6	7.7	0	160000	289	45	-41	nan	-2	nan	-11	nan	201	nan	284	nan	441	nan	1	nan	19.802	0.470542	98	nan	284635515983427	nan
Z72305U1_23	19552_TRA_Data	40	15/08/2015 (7)	12:48:19.360000	24.325	19552_TRA_Data, 12:48:19 PM (24.3 sec)	0.3086	0.0091	0.0442	0.0011	0.26993			0.0514	0.0012	0.40081	0	7.1	no value	NAN	272.2	7.2	278.7	6.9	0	140000	214	48	-42	nan	-2	nan	-9	nan	185	nan	212	nan	295	nan	1	nan	22.6244	0.563052	93	nan	217816217473962	nan
Z72305U1_24	19559_TRA_Data	47	15/08/2015 (7)	12:58:14.580000	25.098	19559_TRA_Data, 12:58:15 PM (25 sec)	0.2801	0.0077	0.03977	0.00098	0.20446			0.0517	0.0011	0.42921	0	6.3	no value	NAN	249.5	6.1	251.3	6.1	0	130000	228	44	-54	nan	-3	nan	-16	nan	275	nan	405	nan	511	nan	1	nan	25.1446	0.619605	106	nan	310181224306137	nan
Z72305U1_25	19560_TRA_Data	48	15/08/2015 (7)	12:59:37.620000	17.976	19560_TRA_Data, 12:59:38 PM (25 sec)	13.65	0.33	0.536	0.013	0.6464			0.1861	0.0026	0.55526	0	74	no value	NAN	2722	23	2763	55	30000	1300000	2700	23	-373	nan	-69	nan	-64	nan	162	nan	158	nan	2289	nan	1	nan	1.86567	0.0452495	-3	nan	2336746553737710	nan
Z72305U1_26	19561_TRA_Data	49	15/08/2015 (7)	13:00:59.850000	24.829	19561_TRA_Data, 1:01:00 PM (24.8 sec)	0.938	0.024	0.111	0.0027	0.38877			0.0617	0.0011	0.37743	0	17	no value	NAN	669	13	678	16	0	340000	624	37	-109	nan	-7	nan	-46	nan	178	nan	399	nan	1346	nan	0	nan	9.00901	0.219138	-14	nan	633001827233430	nan
Z72305U1_27	19562_TRA_Data	50	15/08/2015 (7)	13:02:21.680000	24.997	19562_TRA_Data, 1:02:22 PM (24.9 sec)	0.284	0.013	0.0401	0.0012	0.064694			0.0539	0.0024	0.46095	0	6.3	no value	NAN	249	10	253.1	7.5	0	130000	189	86	-6	nan	0	nan	-1	nan	43	nan	44	nan	55	nan	1	nan	24.9377	0.746264	102	nan	45126364535829	nan
Z72305U1_28	19565_TRA_Data	53	15/08/2015 (7)	13:06:30.320000	24.358	19565_TRA_Data, 1:06:30 PM (24.3 sec)	0.531	0.015	0.0692	0.0017	0.28285			0.0561	0.0011	0.33443	0	11	no value	NAN	429.5	9.7	431	10	0	210000	399	43	-57	nan	-3	nan	-22	nan	163	nan	318	nan	669	nan	0	nan	14.4509	0.355007	-18	nan	347264482970268	nan
Z72305U1_29	19566_TRA_Data	54	15/08/2015 (7)	13:07:52.440000	26.24	19566_TRA_Data, 1:07:52 PM (26.2 sec)	0.2779	0.0079	0.03873	0.00098	0.21535			0.0526	0.0011	0.43752	0	6	no value	NAN	247.8	6.2	244.8	6.1	0	120000	264	46	-52	nan	-3	nan	-12	nan	266	nan	310	nan	348	nan	1	nan	25.8198	0.653328	113	nan	270406375794414	nan
Z72305U1_30	19567_TRA_Data	55	15/08/2015 (7)	13:09:15.220000	24.459	19567_TRA_Data, 1:09:15 PM (24.4 sec)	0.414	0.016	0.0559	0.0015	0.10268			0.0554	0.0019	0.4054	0	8.9	no value	NAN	347	11	350.1	9.2	0	180000	287	69	-14	nan	-1	nan	-2	nan	57	nan	49	nan	83	nan	1	nan	17.8891	0.480029	103	nan	80237386239023	nan
Z72305U1_31	19568_TRA_Data	56	15/08/2015 (7)	13:10:37.560000	24.123	19568_TRA_Data, 1:10:38 PM (24.1 sec)	0.2702	0.0072	0.03865	0.00095	0.22409			0.0512	0.001	0.44344	0	6.3	no value	NAN	242.1	5.8	244.4	5.9	0	130000	214	42	-69	nan	-4	nan	-7	nan	368	nan	190	nan	230	nan	2	nan	25.8732	0.635952	60	nan	332866023362308	nan
Z72305U1_32	19569_TRA_Data	57	15/08/2015 (7)	13:12:02.540000	21.137	19569_TRA_Data, 1:12:00 PM (24.1 sec)	0.548	0.015	0.0709	0.0018	0.21929			0.0566	0.0012	0.42951	0	11	no value	NAN	441	10	441	11	0	220000	418	48	-66	nan	-4	nan	-11	nan	149	nan	135	nan	293	nan	1	nan	14.1044	0.35808	38	nan	269426595348900	nan
Z72305U1_33	19570_TRA_Data	58	15/08/2015 (7)	13:13:21.790000	23.888	19570_TRA_Data, 1:13:22 PM (23.8 sec)	0.2776	0.0073	0.03448	0.00084	0.25456			0.0587	0.0011	0.40383	0	6.1	no value	NAN	248.3	5.8	218.6	5.2	0	120000	506	40	-150	nan	-9	nan	-84	nan	925	nan	2424	nan	2823	nan	0	nan	29.0023	0.706553	58	nan	1077900728970910	nan
Z72305U1_34	19571_TRA_Data	59	15/08/2015 (7)	13:14:44.590000	23.781	19571_TRA_Data, 1:14:45 PM (24 sec)	0.2788	0.0074	0.03946	0.00098	0.15082			0.05157	0.00099	0.44309	0	6.5	no value	NAN	248.9	5.9	249.4	6	0	130000	236	41	-69	nan	-3	nan	-13	nan	383	nan	394	nan	493	nan	1	nan	25.3421	0.629378	91	nan	397398387345754	nan
Z72305U1_35	19572_TRA_Data	60	15/08/2015 (7)	13:16:06.840000	11.969	19572_TRA_Data, 1:16:07 PM (25.8 sec)	0.3156	0.0086	0.0394	0.0011	0.33701			0.0588	0.0012	0.54016	0	6.6	no value	NAN	277.8	6.7	248.7	6.5	0	130000	526	47	-137	nan	-8	nan	-81	nan	776	nan	2184	nan	2703	nan	0	nan	25.3807	0.708599	66	nan	1059029007262270	nan
Z72305U1_36	19579_TRA_Data	67	15/08/2015 (7)	13:26:00.780000	25.904	19579_TRA_Data, 1:26:01 PM (25.9 sec)	1.838	0.047	0.1795	0.0044	0.3583			0.0743	0.0013	0.37217	0	29	no value	NAN	1055	17	1064	24	1000	550000	1019	35	-126	nan	-9	nan	-13	nan	96	nan	51	nan	283	nan	2	nan	5.57103	0.13656	-28	nan	414148806792533	nan
Z72305U1_37	19580_TRA_Data	68	15/08/2015 (7)	13:27:23.830000	23.854	19580_TRA_Data, 1:27:24 PM (23.8 sec)	0.328	0.011	0.0448	0.0012	0.10502			0.0541	0.0017	0.42741	0	7.6	no value	NAN	284.8	8.6	282.3	7.4	0	150000	269	62	-36	nan	-2	nan	-5	nan	88	nan	66	nan	95	nan	1	nan	22.3214	0.597895	115	nan	98143909213806	nan
Z72305U1_38	19581_TRA_Data	69	15/08/2015 (7)	13:28:46.250000	19.032	19581_TRA_Data, 1:28:46 PM (24.4 sec)	0.596	0.021	0.0721	0.002	0.14895			0.0602	0.0019	0.49287	0	12	no value	NAN	470	13	449	12	0	240000	512	66	-37	nan	-2	nan	-5	nan	70	nan	54	nan	121	nan	1	nan	13.8696	0.384733	65	nan	126232115105450	nan
Z72305U1_39	19582_TRA_Data	70	15/08/2015 (7)	13:30:08.540000	26.139	19582_TRA_Data, 1:30:09 PM (26.1 sec)	4.93	0.12	0.3263	0.0077	0.52761			0.1092	0.0015	0.47703	0	48	no value	NAN	1805	20	1819	38	2000	880000	1772	25	-370	nan	-41	nan	-65	nan	135	nan	135	nan	1219	nan	1	nan	3.06466	0.0723197	-5	nan	1126003125954560	nan
Z72305U1_40	19584_TRA_Data	72	15/08/2015 (7)	13:32:53.120000	24.56	19584_TRA_Data, 1:32:53 PM (24.5 sec)	0.835	0.02	0.0952	0.0023	0.63986			0.06331	0.00088	0.46611	0	16	no value	NAN	615	11	587	14	0	310000	699	29	-478	nan	-31	nan	-71	nan	740	nan	553	nan	1682	nan	1	nan	10.5042	0.253778	-1	nan	1720778741002880	nan
Z72305U1_41	19585_TRA_Data	73	15/08/2015 (7)	13:34:27.900000	11.776	19585_TRA_Data, 1:34:15 PM (24.4 sec)	0.672	0.019	0.0688	0.0019	0.58309			0.0707	0.0014	0.47217	0	18	no value	NAN	520	11	429	12	0	340000	920	39	-295	nan	-20	nan	-20	nan	526	nan	123	nan	420	nan	4	nan	14.5349	0.401399	48	nan	808299308809586	nan
Z72305U1_42	19586_TRA_Data	74	15/08/2015 (7)	13:35:37.290000	20.546	19586_TRA_Data, 1:35:37 PM (24.3 sec)	0.2723	0.009	0.03749	0.00099	0.20846			0.0532	0.0015	0.38548	0	6.2	no value	NAN	242.8	7.2	237.1	6.2	0	120000	259	58	-55	nan	-3	nan	-13	nan	175	nan	216	nan	258	nan	1	nan	26.6738	0.704376	93	nan	176538268654631	nan
Z72305U1_43	19587_TRA_Data	75	15/08/2015 (7)	13:36:59.950000	17.64	19587_TRA_Data, 1:37:00 PM (24.7 sec)	6.75	0.17	0.3898	0.0099	0.48339			0.1257	0.0021	0.46789	0	60	no value	NAN	2074	23	2117	46	20000	1100000	2017	30	-194	nan	-25	nan	-47	nan	56	nan	71	nan	802	nan	1	nan	2.56542	0.0651556	-7	nan	545380667121899	nan
Z72305U1_44	19588_TRA_Data	76	15/08/2015 (7)	13:38:22.080000	25.602	19588_TRA_Data, 1:38:22 PM (25.6 sec)	0.92	0.022	0.1075	0.0026	0.57525			0.06174	0.00086	0.45071	0	18	no value	NAN	662	12	658	15	0	350000	648	29	-488	nan	-30	nan	-26	nan	612	nan	170	nan	586	nan	3	nan	9.30233	0.224987	-22	nan	1470788037046710	nan
Z72305U1_45	19589_TRA_Data	77	15/08/2015 (7)	13:39:45.280000	21.394	19589_TRA_Data, 1:39:45 PM (25.4 sec)	0.2834	0.007	0.03532	0.00087	0.43667			0.05786	0.00091	0.52648	0	6.8	no value	NAN	252.9	5.5	223.7	5.4	0	140000	499	35	-331	nan	-19	nan	-25	nan	1167	nan	377	nan	494	nan	3	nan	28.3126	0.697393	31	nan	941312913095929	nan
Z72305U1_46	19590_TRA_Data	78	15/08/2015 (7)	13:41:07.880000	24.795	19590_TRA_Data, 1:41:08 PM (24.7 sec)	5.9	0.14	0.3489	0.0083	0.54864			0.1219	0.0017	0.49443	0	51	no value	NAN	1957	21	1926	40	2000	930000	1972	24	-478	nan	-60	nan	-61	nan	158	nan	114	nan	1107	nan	1	nan	2.86615	0.068183	1	nan	1322351508180130	nan
Z72305U1_47	19591_TRA_Data	79	15/08/2015 (7)	13:42:30.550000	25.131	19591_TRA_Data, 1:42:31 PM (25.1 sec)	4.85	0.14	0.321	0.0088	0.38254			0.1103	0.0024	0.51777	0	48	no value	NAN	1778	25	1786	43	2000	870000	1756	41	-52	nan	-6	nan	-14	nan	20	nan	32	nan	290	nan	1	nan	3.11526	0.0854029	-14	nan	165163274701191	nan
Z72305U1_48	19592_TRA_Data	80	15/08/2015 (7)	13:43:53.050000	22.021	19592_TRA_Data, 1:43:53 PM (24.6 sec)	0.559	0.014	0.0721	0.0018	0.2916			0.05593	0.00098	0.43974	0	12	no value	NAN	449.3	9.2	449	11	0	230000	420	38	-250	nan	-14	nan	-59	nan	359	nan	442	nan	973	nan	1	nan	13.8696	0.34626	82	nan	696397489019028	nan
Z72305U1_49	19600_TRA_Data	88	15/08/2015 (7)	13:55:11.320000	24.358	19600_TRA_Data, 1:55:11 PM (24.3 sec)	1.72	0.044	0.1712	0.0042	0.38811			0.0721	0.0012	0.43783	0	29	no value	NAN	1011	17	1019	23	1000	540000	951	36	-200	nan	-15	nan	-6	nan	119	nan	18	nan	98	nan	7	nan	5.84112	0.143298	-32	nan	451090554876102	nan
Z72305U1_50	19601_TRA_Data	89	15/08/2015 (7)	13:56:34.050000	24.627	19601_TRA_Data, 1:56:34 PM (24.6 sec)	0.2876	0.0082	0.04	0.001	0.22041			0.052	0.0011	0.41686	0	6.7	no value	NAN	255.4	6.4	252.8	6.2	0	130000	240	47	-112	nan	-6	nan	-41	nan	277	nan	505	nan	648	nan	1	nan	25	0.625	78	nan	333101217842232	nan
Z72305U1_51	19602_TRA_Data	90	15/08/2015 (7)	13:57:56.490000	18.951	19602_TRA_Data, 1:57:56 PM (24.1 sec)	1.685	0.046	0.1679	0.0042	0.34215			0.0721	0.0014	0.37176	0	26	no value	NAN	997	18	999	23	1000	500000	943	41	-156	nan	-11	nan	-50	nan	97	nan	163	nan	800	nan	1	nan	5.95593	0.148987	-13	nan	478871613038753	nan
Z72305U1_52	19605_TRA_Data	93	15/08/2015 (7)	14:02:03.780000	24.896	19605_TRA_Data, 2:02:04 PM (24.8 sec)	0.516	0.018	0.0679	0.0018	0.14378			0.0561	0.0018	0.45055	0	11	no value	NAN	417	12	423	11	0	220000	336	64	-31	nan	-2	nan	-8	nan	58	nan	74	nan	154	nan	1	nan	14.7275	0.390421	102	nan	106291064652267	nan
Z72305U1_53	19606_TRA_Data	94	15/08/2015 (7)	14:03:26.050000	16.649	19606_TRA_Data, 2:03:26 PM (24.6 sec)	0.2438	0.0066	0.03356	0.00086	0.39848			0.0523	0.001	0.45295	0	5.7	no value	NAN	220.9	5.4	212.7	5.3	0	110000	269	42	-243	nan	-13	nan	-68	nan	792	nan	1069	nan	1143	nan	1	nan	29.7974	0.76358	73	nan	734589231701283	nan
Z72305U1_54	19607_TRA_Data	95	15/08/2015 (7)	14:04:49.150000	24.526	19607_TRA_Data, 2:04:49 PM (24.5 sec)	0.433	0.011	0.0576	0.0014	0.10948			0.0542	0.001	0.14559	0	9.8	no value	NAN	363.6	8.1	361.7	8.7	0	200000	331	41	-186	nan	-10	nan	-16	nan	276	nan	121	nan	221	nan	2	nan	17.3611	0.421971	82	nan	370251695942640	nan
Z72305U1_55	19608_TRA_Data	96	15/08/2015 (7)	14:06:19.060000	16.615	19608_TRA_Data, 2:06:11 PM (24.3 sec)	5.55	0.13	0.3459	0.0084	0.53672			0.115	0.0016	0.58806	0	54	no value	NAN	1906	21	1913	40	2000	980000	1871	25	-897	nan	-104	nan	-63	nan	260	nan	106	nan	1071	nan	2	nan	2.89101	0.0702066	-3	nan	2024378732403600	nan
Z72305U1_56	19609_TRA_Data	97	15/08/2015 (7)	14:07:33.660000	24.022	19609_TRA_Data, 2:07:34 PM (24 sec)	4.92	0.13	0.3193	0.0083	0.40172			0.1113	0.0022	0.42213	0	50	no value	NAN	1790	23	1780	40	2000	920000	1774	37	-77	nan	-9	nan	-13	nan	26	nan	25	nan	235	nan	1	nan	3.13185	0.0814105	-6	nan	197718320939100	nan
Z72305U1_57	19610_TRA_Data	98	15/08/2015 (7)	14:08:56.220000	24.459	19610_TRA_Data, 2:08:56 PM (24.4 sec)	3.299	0.078	0.2572	0.0062	0.48616			0.0922	0.0013	0.56085	0	41	no value	NAN	1478	18	1473	32	2000	760000	1459	27	-664	nan	-61	nan	-203	nan	251	nan	414	nan	3130	nan	1	nan	3.88802	0.0937238	-4	nan	1871233144299870	nan
Z72305U1_58	19611_TRA_Data	99	15/08/2015 (7)	14:10:31.790000	11.888	19611_TRA_Data, 2:10:19 PM (24.7 sec)	3.644	0.097	0.2705	0.007	0.44295			0.0963	0.0018	0.43398	0	46	no value	NAN	1555	22	1542	36	2000	850000	1533	35	-228	nan	-22	nan	-26	nan	88	nan	59	nan	516	nan	1	nan	3.69686	0.0956673	-3	nan	590879080698228	nan
Z72305U1_59	19619_TRA_Data	107	15/08/2015 (7)	14:21:37.050000	24.627	19619_TRA_Data, 2:21:37 PM (24.6 sec)	5.47	0.14	0.3436	0.0086	0.052474			0.116	0.0019	0.56814	0	53	no value	NAN	1892	21	1899	41	2000	970000	1870	30	-187	nan	-21	nan	-47	nan	53	nan	73	nan	728	nan	1	nan	2.91036	0.0728437	-5	nan	463234114256178	nan
Z72305U1_60	19620_TRA_Data	108	15/08/2015 (7)	14:22:59.290000	24.392	19620_TRA_Data, 2:22:59 PM (24.3 sec)	0.2323	0.0062	0.0334	0.00082	0.19438			0.0505	0.001	0.45865	0	5.6	no value	NAN	211.7	5.2	211.7	5.1	0	110000	191	42	-152	nan	-8	nan	-16	nan	437	nan	241	nan	254	nan	2	nan	29.9401	0.735057	90	nan	346874984362177	nan
Z72305U1_61	19621_TRA_Data	109	15/08/2015 (7)	14:24:22.220000	24.459	19621_TRA_Data, 2:24:22 PM (24.4 sec)	4.12	0.1	0.2942	0.0072	0.41663			0.1015	0.0016	0.52563	0	45	no value	NAN	1652	20	1660	36	2000	830000	1628	30	-255	nan	-27	nan	-67	nan	84	nan	125	nan	1066	nan	1	nan	3.39905	0.0831854	-6	nan	685040612457729	nan
Z72305U1_62	19622_TRA_Data	110	15/08/2015 (7)	14:25:44.590000	24.09	19622_TRA_Data, 2:25:45 PM (24 sec)	0.3517	0.0094	0.0482	0.0012	0.29416			0.0526	0.001	0.42022	0	8.2	no value	NAN	305.2	7.1	303.3	7.3	0	160000	274	42	-163	nan	-9	nan	-20	nan	325	nan	210	nan	326	nan	1	nan	20.7469	0.51652	67	nan	379779716133462	nan
Z72305U1_63	19625_TRA_Data	113	15/08/2015 (7)	14:29:58.530000	17.893	19625_TRA_Data, 2:29:52 PM (26.2 sec)	0.483	0.015	0.0616	0.0018	0.56548			0.0568	0.0013	0.36448	0	10	no value	NAN	396	10	385	11	0	200000	433	48	-144	nan	-9	nan	-23	nan	261	nan	229	nan	414	nan	1	nan	16.2338	0.474363	47	nan	392792232327679	nan
Z72305U1_64	19627_TRA_Data	115	15/08/2015 (7)	14:32:37.350000	25.333	19627_TRA_Data, 2:32:37 PM (25.3 sec)	0.521	0.013	0.0686	0.0017	0.33795			0.05485	0.00095	0.40539	0	11	no value	NAN	424.2	8.9	428	10	0	220000	373	38	-273	nan	-15	nan	-28	nan	319	nan	170	nan	359	nan	2	nan	14.5773	0.361244	39	nan	516605844454373	nan
Z72305U1_65	19629_TRA_Data	117	15/08/2015 (7)	14:35:37.790000	9.8853	19629_TRA_Data, 2:35:23 PM (24.2 sec)	5.3	0.16	0.338	0.01	0.88362			0.1125	0.0017	0.31389	0	59	no value	NAN	1863	26	1873	50	20000	1100000	1830	27	-918	nan	-104	nan	-5	nan	234	nan	8	nan	87	nan	31	nan	2.95858	0.0875319	-4	nan	1606438977812410	nan
Z72305U1_66	19630_TRA_Data	118	15/08/2015 (7)	14:36:46.360000	24.325	19630_TRA_Data, 2:36:46 PM (24.3 sec)	2.754	0.071	0.2343	0.0059	0.3651			0.0856	0.0015	0.49907	0	36	no value	NAN	1336	19	1356	31	1000	670000	1291	36	-129	nan	-11	nan	-18	nan	52	nan	40	nan	277	nan	1	nan	4.26803	0.107475	-20	nan	304713626082861	nan
Z72305U1_67	19631_TRA_Data	119	15/08/2015 (7)	14:38:16.560000	16.115	19631_TRA_Data, 2:38:08 PM (25 sec)	2.484	0.071	0.2152	0.0056	0.27828			0.0838	0.0019	0.4375	0	32	no value	NAN	1262	21	1254	30	1000	620000	1250	45	-102	nan	-9	nan	-10	nan	46	nan	28	nan	182	nan	2	nan	4.64684	0.120922	-17	nan	238554066220983	nan
Z72305U1_68	19639_TRA_Data	127	15/08/2015 (7)	14:49:28.950000	12.253	19639_TRA_Data, 2:49:27 PM (25.6 sec)	4.65	0.12	0.3085	0.008	0.57306			0.1092	0.0018	0.41301	0	49	no value	NAN	1753	21	1731	39	2000	890000	1773	30	-944	nan	-105	nan	-245	nan	268	nan	353	nan	3233	nan	1	nan	3.24149	0.0840581	1	nan	2213164222893400	nan
Z72305U1_69	19641_TRA_Data	129	15/08/2015 (7)	14:52:12.410000	25.266	19641_TRA_Data, 2:52:12 PM (25.2 sec)	5.3	0.13	0.354	0.0085	0.56762			0.1086	0.0015	0.48519	0	51	no value	NAN	1866	20	1950	40	2000	930000	1761	25	-702	nan	-78	nan	-48	nan	159	nan	60	nan	596	nan	3	nan	2.82486	0.0678285	-12	nan	1185639936596250	nan
[truncated: 22 more columns]

## Sheet: 7321-8-1-1473m
	Source file	DateTime	Date	Time	Duration(s)	Comments	Final207_235	Final207_235_Prop2SE	Final206_238	Final206_238_Prop2SE	ErrorCorrelation_6_38vs7_35	Final238_206	Final238_206_Prop2SE	Final207_206	Final207_206_Prop2SE	ErrorCorrelation_38_6vs7_6	Final208_232	Final208_232_Prop2SE	Final206_208	Final206_208_Prop2SE	FinalAge207_235	FinalAge207_235_Prop2SE	FinalAge206_238	FinalAge206_238_Prop2SE	FinalAge208_232	FinalAge208_232_Prop2SE	FinalAge207_206	FinalAge207_206_Prop2SE	Final206_204	Final206_204_Prop2SE	Final207_204	Final207_204_Prop2SE	Final208_204	Final208_204_Prop2SE	Approx_U_PPM	Approx_U_PPM_Prop2SE	Approx_Th_PPM	Approx_Th_PPM_Prop2SE	Approx_Pb_PPM	Approx_Pb_PPM_Prop2SE	FInal_U_Th_Ratio	FInal_U_Th_Ratio_Prop2SE	Final238_206	Final238_206_Prop2SE	FinalDiscPercent	FinalDiscPercent_Prop2SE	Dose	Dose_Prop2SE	PDP/histogram:
Z_GJ1_1	21183_TRA_Data	3	17/09/2015 (5)	11:28:05.920000	24.762	21183_TRA_Data, 11:28:06 AM (24.7 sec)	0.827	0.024	0.0991	0.0023	0.58686			0.06069	0.0009	0.35038	0.0303	0.0022	310	230	609	13	608	13	597	42	585	32	-55	nan	-4	nan	-1	nan	468	nan	9	nan	3	nan	53	nan	10.0908	0.234197	97	nan	978490357153341	nan
Z_GJ1_2	21184_TRA_Data	4	17/09/2015 (5)	11:29:31.100000	19.58	21184_TRA_Data, 11:29:27 AM (23.6 sec)	0.824	0.024	0.0995	0.0022	0.48205			0.05978	0.00094	0.40436	0.0295	0.0022	300	220	608	13	611	13	586	44	565	34	-100	nan	-6	nan	-1	nan	457	nan	9	nan	3	nan	52	nan	10.0503	0.222217	3	nan	966664588105934	nan
Z_GJ1_3	21203_TRA_Data	23	17/09/2015 (5)	11:55:45.480000	20.879	21203_TRA_Data, 11:55:44 AM (24.8 sec)	0.836	0.024	0.1007	0.0023	0.58412			0.06013	0.00084	0.45877	0.0302	0.0022	380	280	615	13	618	13	597	43	579	31	-149	nan	-9	nan	-1	nan	460	nan	9	nan	3	nan	51	nan	9.93049	0.226814	-7	nan	977048095143124	nan
Z_GJ1_4	21204_TRA_Data	24	17/09/2015 (5)	11:57:13.020000	18.665	21204_TRA_Data, 11:57:06 AM (25.6 sec)	0.825	0.024	0.1006	0.0023	0.39802			0.05927	0.00088	0.42869	0.0295	0.0022	420	300	608	13	618	13	581	44	546	32	-106	nan	-6	nan	-1	nan	427	nan	9	nan	2	nan	50	nan	9.94036	0.227265	5	nan	915251937722695	nan
Z_GJ1_5	21223_TRA_Data	43	17/09/2015 (5)	12:23:28.500000	20.182	21223_TRA_Data, 12:23:24 PM (24.8 sec)	0.842	0.024	0.1009	0.0022	0.44251			0.0606	0.00088	0.46962	0.0295	0.0023	360	250	618	13	619	13	581	44	597	31	-160	nan	-9	nan	-1	nan	462	nan	10	nan	3	nan	48	nan	9.9108	0.216093	-48	nan	987198565827550	nan
Z_GJ1_6	21224_TRA_Data	44	17/09/2015 (5)	12:24:45.890000	25.33	21224_TRA_Data, 12:24:47 PM (25 sec)	0.831	0.024	0.1008	0.0023	0.43029			0.06022	0.00087	0.45503	0.03	0.0022	380	280	612	13	618	13	591	44	575	32	-208	nan	-13	nan	-1	nan	489	nan	10	nan	3	nan	50	nan	9.92064	0.226364	26	nan	1037913313617520	nan
Z_GJ1_7	21243_TRA_Data	63	17/09/2015 (5)	12:51:03.890000	23.787	21243_TRA_Data, 12:51:04 PM (23.7 sec)	0.827	0.023	0.1	0.0022	0.46334			0.05992	0.00089	0.47725	0.029	0.0025	131	99	611	13	616	13	569	49	566	33	-191	nan	-11	nan	-1	nan	463	nan	9	nan	2	nan	52	nan	10	0.22	-25	nan	985384750536660	nan
Z_GJ1_8	21244_TRA_Data	64	17/09/2015 (5)	12:52:26.120000	22.463	21244_TRA_Data, 12:52:26 PM (24.5 sec)	0.82	0.023	0.1004	0.0023	0.51823			0.05946	0.00088	0.49077	0.0323	0.0024	150	110	605	13	616	13	638	47	549	32	-208	nan	-12	nan	-1	nan	483	nan	9	nan	3	nan	53	nan	9.96016	0.228171	2	nan	1020244309476420	nan
Z_GJ1_9	21263_TRA_Data	83	17/09/2015 (5)	13:18:42.340000	23.594	21263_TRA_Data, 1:18:42 PM (24.6 sec)	0.815	0.023	0.1002	0.0022	0.37104			0.05934	0.00089	0.37424	0.0319	0.0026	-140	130	601	13	615	13	632	50	539	32	-218	nan	-13	nan	-1	nan	459	nan	9	nan	3	nan	54	nan	9.98004	0.219123	-25	nan	967777819623708	nan
Z_GJ1_10	21264_TRA_Data	84	17/09/2015 (5)	13:20:08.520000	21.163	21264_TRA_Data, 1:20:05 PM (24.8 sec)	0.826	0.024	0.1004	0.0022	0.38469			0.05987	0.0009	0.38487	0.028	0.0025	-170	120	609	13	616	13	552	48	561	32	-213	nan	-13	nan	-1	nan	447	nan	9	nan	2	nan	52	nan	9.96016	0.21825	-54	nan	949671356412450	nan
Z_GJ1_11	21283_TRA_Data	103	17/09/2015 (5)	13:46:26.340000	20.538	21283_TRA_Data, 1:46:24 PM (24.1 sec)	0.823	0.024	0.099	0.0022	0.017427			0.06043	0.00091	0.084846	0.0299	0.0025	230	170	607	13	608	13	587	49	578	32	-207	nan	-13	nan	-1	nan	435	nan	9	nan	2	nan	52	nan	10.101	0.224467	-22	nan	908485168997692	nan
Z_GJ1_12	21284_TRA_Data	104	17/09/2015 (5)	13:47:47.240000	22.006	21284_TRA_Data, 1:47:45 PM (25.2 sec)	0.848	0.024	0.1017	0.0022	0.42185			0.06056	0.00091	0.47618	0.0312	0.0026	160	130	621	13	624	13	612	51	585	33	-221	nan	-14	nan	-1	nan	418	nan	8	nan	2	nan	52	nan	9.83284	0.212706	6	nan	903272358980300	nan
Z_GJ1_13	21303_TRA_Data	123	17/09/2015 (5)	14:14:05.420000	23.946	21303_TRA_Data, 2:14:05 PM (25 sec)	0.838	0.024	0.101	0.0022	0.051535			0.05997	0.0009	0.10358	0.0305	0.0025	-12	43	615	13	620	13	599	48	558	32	-240	nan	-14	nan	-1	nan	446	nan	9	nan	2	nan	53	nan	9.90099	0.215665	-13	nan	951127303022145	nan
Z_GJ1_14	21304_TRA_Data	124	17/09/2015 (5)	14:15:26.750000	24.93	21304_TRA_Data, 2:15:27 PM (24.9 sec)	0.827	0.024	0.1005	0.0023	0.30633			0.05998	0.00091	0.46334	0.0302	0.0024	-114	99	611	13	616	13	594	47	562	33	-283	nan	-17	nan	-1	nan	459	nan	9	nan	2	nan	54	nan	9.95025	0.227717	51	nan	971230847899040	nan
Z_GJ1_15	21323_TRA_Data	143	17/09/2015 (5)	14:41:44.020000	24.661	21323_TRA_Data, 2:41:44 PM (24.6 sec)	0.827	0.024	0.1003	0.0023	0.53339			0.05989	0.00089	0.47132	0.0302	0.0026	380	280	610	13	616	13	595	51	563	33	-313	nan	-19	nan	-1	nan	509	nan	11	nan	3	nan	49	nan	9.97009	0.228626	-2	nan	1074655250173500	nan
Z_GJ1_16	21324_TRA_Data	144	17/09/2015 (5)	14:43:06.650000	25.03	21324_TRA_Data, 2:43:07 PM (25 sec)	0.832	0.023	0.1008	0.0023	0.54878			0.05991	0.00086	0.4887	0.0324	0.0026	250	180	613	13	619	13	638	51	566	31	-293	nan	-18	nan	-1	nan	499	nan	11	nan	3	nan	49	nan	9.92064	0.226364	-50	nan	1062642082260390	nan
Z_GJ1_17	21343_TRA_Data	163	17/09/2015 (5)	15:09:28.870000	18.113	21343_TRA_Data, 3:09:24 PM (23.9 sec)	0.815	0.023	0.0995	0.0022	0.4466			0.05927	0.00091	0.48122	0.03	0.0025	62	63	603	13	611	13	590	48	543	33	-308	nan	-19	nan	-1	nan	442	nan	8	nan	2	nan	53	nan	10.0503	0.222217	-17	nan	937546462853182	nan
Z_GJ1_18	21344_TRA_Data	164	17/09/2015 (5)	15:10:46.320000	24.364	21344_TRA_Data, 3:10:46 PM (24.8 sec)	0.831	0.024	0.1024	0.0024	0.15061			0.05937	0.0009	0.36913	0.0282	0.0023	68	60	611	13	627	14	556	45	542	32	-380	nan	-22	nan	-2	nan	463	nan	8	nan	2	nan	54	nan	9.76562	0.228882	-16	nan	1003875101259930	nan
Z_GJ1_19	21363_TRA_Data	183	17/09/2015 (5)	15:37:05.210000	22.382	21363_TRA_Data, 3:37:04 PM (25.6 sec)	0.841	0.024	0.1005	0.0022	0.20534			0.06078	0.00092	0.17717	0.0313	0.0026	-31	49	616	13	617	13	617	50	588	31	-365	nan	-23	nan	-2	nan	431	nan	8	nan	2	nan	54	nan	9.95025	0.217816	1	nan	919934795342134	nan
Z_GJ1_20	21364_TRA_Data	184	17/09/2015 (5)	15:38:25.850000	23.432	21364_TRA_Data, 3:38:26 PM (24.5 sec)	0.825	0.024	0.1017	0.0023	0.48838			0.05881	0.00089	0.49054	0.0312	0.0026	48	48	607	13	623	13	613	50	525	33	-310	nan	-19	nan	-2	nan	427	nan	8	nan	2	nan	56	nan	9.83284	0.222375	-21	nan	919980806267342	nan
Z_GJ1_21	21383_TRA_Data	203	17/09/2015 (5)	16:04:47.180000	25.501	21383_TRA_Data, 4:04:47 PM (25.5 sec)	0.829	0.024	0.1002	0.0022	0.32567			0.05991	0.00089	0.26603	0.0292	0.0023	-1190	890	610	13	615	13	576	46	554	32	-434	nan	-26	nan	-2	nan	421	nan	8	nan	2	nan	55	nan	9.98004	0.219123	-14	nan	892496476325456	nan
Z_GJ1_22	21384_TRA_Data	204	17/09/2015 (5)	16:06:08.880000	23.015	21384_TRA_Data, 4:06:09 PM (25.8 sec)	0.824	0.024	0.1003	0.0022	0.60413			0.05924	0.00084	0.37845	0.0288	0.0024	-970	720	607	13	617	13	570	46	539	31	-384	nan	-23	nan	-2	nan	433	nan	8	nan	2	nan	54	nan	9.97009	0.218686	-31	nan	920352275328356	nan
		#VALUE!
Z_Plesovice_1	21185_TRA_Data	5	17/09/2015 (5)	11:30:54.680000	21.549	21185_TRA_Data, 11:30:52 AM (25.7 sec)	0.385	0.01	0.0524	0.001	0.52174			0.05295	0.00062	0.32833	0.01522	0.00068	30	21	330.1	7.7	329.1	6.4	305	14	310	26	-141	nan	-8	nan	-5	nan	932	nan	103	nan	15	nan	9	nan	19.084	0.364198	70	nan	1050358262473720	nan
Z_Plesovice_2	21186_TRA_Data	6	17/09/2015 (5)	11:32:14.440000	26.24	21186_TRA_Data, 11:32:14 AM (26.2 sec)	0.386	0.01	0.0529	0.0011	0.49508			0.05245	0.00062	0.32623	0.0153	0.00069	28	20	330.8	7.7	332.2	6.5	307	14	288	26	-69	nan	-4	nan	-2	nan	943	nan	114	nan	17	nan	9	nan	18.9036	0.39308	147	nan	1078087512605590	nan
Z_Plesovice_3	21205_TRA_Data	25	17/09/2015 (5)	11:58:33.900000	20.375	21205_TRA_Data, 11:58:34 AM (22.7 sec)	0.388	0.011	0.0532	0.0011	0.49982			0.05259	0.00065	0.39073	0.0159	0.00075	37	27	331.9	7.8	333.9	6.7	319	15	295	28	-146	nan	-8	nan	-4	nan	849	nan	91	nan	14	nan	9	nan	18.797	0.38866	46	nan	974627430556413	nan
Z_Plesovice_4	21206_TRA_Data	26	17/09/2015 (5)	11:59:53.430000	22.846	21206_TRA_Data, 11:59:54 AM (24.7 sec)	0.389	0.011	0.0533	0.0011	0.42391			0.05265	0.00068	0.23449	0.01568	0.00072	35	25	332.7	7.9	334.4	6.6	314	14	289	28	-153	nan	-8	nan	-4	nan	938	nan	110	nan	16	nan	9	nan	18.7617	0.387203	39	nan	1077636366640220	nan
Z_Plesovice_5	21225_TRA_Data	45	17/09/2015 (5)	12:26:14.230000	18.792	21225_TRA_Data, 12:26:13 PM (22.3 sec)	0.388	0.011	0.0535	0.0011	0.53178			0.05242	0.00067	0.32719	0.01598	0.00075	31	22	332	7.8	336	6.7	320	15	280	28	-168	nan	-9	nan	-5	nan	905	nan	99	nan	15	nan	9	nan	18.6916	0.384313	39	nan	1045279671154910	nan
Z_Plesovice_6	21226_TRA_Data	46	17/09/2015 (5)	12:27:32.980000	22.733	21226_TRA_Data, 12:27:33 PM (25.7 sec)	0.386	0.011	0.0532	0.0011	0.47169			0.05224	0.00064	0.34693	0.01591	0.00074	29	20	330.7	7.8	334.3	6.6	319	15	276	27	-223	nan	-12	nan	-7	nan	993	nan	115	nan	17	nan	9	nan	18.797	0.38866	13	nan	1137527916461690	nan
Z_Plesovice_7	21245_TRA_Data	65	17/09/2015 (5)	12:53:50.240000	21.387	21245_TRA_Data, 12:53:51 PM (24.2 sec)	0.392	0.011	0.0525	0.0011	0.53158			0.05368	0.00071	0.39708	0.016	0.00078	31	22	334.9	8.1	330	7	321	15	332	29	-166	nan	-9	nan	-5	nan	855	nan	89	nan	14	nan	10	nan	19.0476	0.399093	54	nan	963031548476403	nan
Z_Plesovice_8	21246_TRA_Data	66	17/09/2015 (5)	12:55:13.150000	22.094	21246_TRA_Data, 12:55:13 PM (24.5 sec)	0.39	0.011	0.0528	0.0011	0.46703			0.05316	0.0007	0.33902	0.01588	0.00075	30	21	333.2	8	332.2	6.6	318	15	309	29	-200	nan	-11	nan	-6	nan	898	nan	98	nan	15	nan	9	nan	18.9394	0.394571	60	nan	1018546199213370	nan
Z_Plesovice_9	21265_TRA_Data	85	17/09/2015 (5)	13:21:29.450000	21.605	21265_TRA_Data, 1:21:30 PM (24.6 sec)	0.395	0.011	0.0535	0.0011	0.37997			0.05337	0.00069	0.37232	0.01566	0.00076	41	29	337.5	7.9	335.9	6.6	314	15	320	29	-184	nan	-10	nan	-5	nan	829	nan	83	nan	12	nan	10	nan	18.6916	0.384313	47	nan	958026914465789	nan
Z_Plesovice_10	21266_TRA_Data	86	17/09/2015 (5)	13:22:51.150000	25.534	21266_TRA_Data, 1:22:51 PM (25.5 sec)	0.389	0.011	0.0533	0.0011	0.51586			0.05278	0.00066	0.3375	0.01552	0.00073	42	30	333	7.8	334.6	6.7	311	14	296	28	-210	nan	-11	nan	-6	nan	866	nan	88	nan	13	nan	10	nan	18.7617	0.387203	66	nan	988855432144625	nan
Z_Plesovice_11	21285_TRA_Data	105	17/09/2015 (5)	13:49:10.210000	22.392	21285_TRA_Data, 1:49:10 PM (25.4 sec)	0.394	0.011	0.0537	0.0011	0.58035			0.05276	0.00064	0.2871	0.01563	0.00074	35	25	336.6	7.9	337.3	6.8	313	15	299	27	-266	nan	-14	nan	-7	nan	776	nan	81	nan	12	nan	10	nan	18.622	0.381456	31	nan	895973372404206	nan
Z_Plesovice_12	21286_TRA_Data	106	17/09/2015 (5)	13:50:33.950000	20.254	21286_TRA_Data, 1:50:33 PM (24.1 sec)	0.393	0.011	0.053	0.0011	0.49438			0.05372	0.00069	0.32712	0.01551	0.00075	34	24	335.6	8	332.6	6.7	311	15	333	28	-283	nan	-16	nan	-8	nan	804	nan	87	nan	13	nan	10	nan	18.8679	0.391598	174	nan	915041694689963	nan
Z_Plesovice_13	21305_TRA_Data	125	17/09/2015 (5)	14:16:51.240000	19.233	21305_TRA_Data, 2:16:51 PM (24.6 sec)	0.393	0.011	0.0534	0.0011	0.41963			0.05317	0.00068	0.37905	0.01563	0.00074	35	24	335.5	7.9	335.7	6.6	313	15	309	29	-280	nan	-15	nan	-8	nan	858	nan	87	nan	13	nan	10	nan	18.7266	0.385754	60	nan	988843814266873	nan
Z_Plesovice_14	21306_TRA_Data	126	17/09/2015 (5)	14:18:13.150000	21.086	21306_TRA_Data, 2:18:13 PM (25.5 sec)	0.392	0.011	0.0536	0.0011	0.49158			0.05272	0.00066	0.39493	0.01586	0.00075	33	23	334.8	7.9	336.6	6.8	318	15	293	28	-321	nan	-17	nan	-9	nan	896	nan	91	nan	13	nan	9	nan	18.6567	0.38288	22	nan	1031834337524520	nan
Z_Plesovice_15	21325_TRA_Data	145	17/09/2015 (5)	14:44:30.990000	19.177	21325_TRA_Data, 2:44:31 PM (24.6 sec)	0.393	0.011	0.0537	0.0011	0.34137			0.05281	0.0007	0.43592	0.01614	0.00077	29	20	336	7.8	337.2	6.6	323	15	296	29	-311	nan	-17	nan	-9	nan	922	nan	108	nan	17	nan	9	nan	18.622	0.381456	-3	nan	1072781101537130	nan
Z_Plesovice_16	21326_TRA_Data	146	17/09/2015 (5)	14:45:57.850000	17.477	21326_TRA_Data, 2:45:58 PM (20.8 sec)	0.396	0.011	0.0539	0.0011	0.47681			0.05289	0.0007	0.31501	0.01675	0.0008	26	18	337.5	8.1	338.3	6.9	335	16	302	30	-306	nan	-16	nan	-10	nan	900	nan	110	nan	18	nan	8	nan	18.5529	0.37863	54	nan	1050545033693400	nan
Z_Plesovice_17	21345_TRA_Data	165	17/09/2015 (5)	15:12:11.390000	24.291	21345_TRA_Data, 3:12:11 PM (24.2 sec)	0.386	0.011	0.0526	0.0011	0.055599			0.05291	0.00068	0.016222	0.01582	0.00073	33	24	330.4	7.7	330.5	6.6	317	15	299	28	-346	nan	-19	nan	-11	nan	949	nan	99	nan	15	nan	9	nan	19.0114	0.397577	42	nan	1075507438785590	nan
Z_Plesovice_18	21346_TRA_Data	166	17/09/2015 (5)	15:13:33.250000	24.426	21346_TRA_Data, 3:13:33 PM (24.4 sec)	0.388	0.011	0.0531	0.0011	0.22886			0.05281	0.00067	0.12288	0.01586	0.00072	33	24	332.2	7.8	333.2	6.6	318	14	295	28	-300	nan	-16	nan	-9	nan	957	nan	99	nan	15	nan	9	nan	18.8324	0.390125	97	nan	1089868174644050	nan
Z_Plesovice_19	21365_TRA_Data	185	17/09/2015 (5)	15:39:51.360000	24.325	21365_TRA_Data, 3:39:51 PM (24.3 sec)	0.383	0.011	0.0525	0.0011	0.49127			0.05274	0.00066	0.46456	0.01532	0.00071	30	22	328.7	7.8	329.9	6.6	307	14	292	27	-416	nan	-23	nan	-14	nan	924	nan	109	nan	16	nan	9	nan	19.0476	0.399093	6	nan	1044176814030500	nan
Z_Plesovice_20	21366_TRA_Data	186	17/09/2015 (5)	15:41:13.280000	25.4	21366_TRA_Data, 3:41:13 PM (25.4 sec)	0.386	0.011	0.0529	0.0011	0.27905			0.05246	0.00064	0.20544	0.01564	0.00072	29	21	330.4	7.7	332.2	6.6	313	14	281	27	-431	nan	-23	nan	-14	nan	885	nan	104	nan	15	nan	9	nan	18.9036	0.39308	32	nan	1010294556855690	nan
Z_Plesovice_21	21385_TRA_Data	205	17/09/2015 (5)	16:07:34.280000	25.4	21385_TRA_Data, 4:07:34 PM (25.4 sec)	0.385	0.011	0.0531	0.0011	0.46798			0.05251	0.00068	0.37994	0.01535	0.00071	31	23	329.9	7.7	333.1	6.7	308	14	283	28	-469	nan	-25	nan	-15	nan	887	nan	102	nan	15	nan	9	nan	18.8324	0.390125	41	nan	1008331773097120	nan
Z_Plesovice_22	21386_TRA_Data	206	17/09/2015 (5)	16:08:57.110000	25.568	21386_TRA_Data, 4:08:57 PM (25.5 sec)	0.385	0.011	0.053	0.0011	0.52281			0.05244	0.00067	0.34046	0.01534	0.0007	32	23	330.3	7.8	332.7	6.6	308	14	281	28	-440	nan	-24	nan	-15	nan	872	nan	100	nan	14	nan	9	nan	18.8679	0.391598	77	nan	993007033436558	nan
		#VALUE!
Z_91500_1	21181_TRA_Data	1	17/09/2015 (5)	11:25:19.070000	26.61	21181_TRA_Data, 11:25:19 AM (26.6 sec)	1.852	0.053	0.1789	0.0037	0.25818			0.075	0.0013	0.43642	0.0525	0.0024	9.4	6.7	1057	19	1060	21	1034	46	1011	35	-40	nan	-3	nan	-4	nan	80	nan	30	nan	15	nan	3	nan	5.58971	0.115606	-21	nan	330456314377128	nan
Z_91500_2	21182_TRA_Data	2	17/09/2015 (5)	11:26:43.300000	20.518	21182_TRA_Data, 11:26:41 AM (24.5 sec)	1.834	0.053	0.178	0.0038	0.13299			0.0751	0.0013	0.1781	0.0515	0.0024	9.3	6.7	1051	19	1055	20	1013	45	1016	35	-26	nan	-2	nan	-3	nan	81	nan	31	nan	15	nan	3	nan	5.61798	0.119934	10	nan	335094937867497	nan
Z_91500_3	21201_TRA_Data	21	17/09/2015 (5)	11:52:57.550000	16.999	21201_TRA_Data, 11:52:58 AM (25.1 sec)	1.87	0.056	0.1805	0.0039	0.41014			0.0751	0.0012	0.4098	0.0538	0.0026	9.3	6.8	1066	18	1068	21	1056	49	1031	34	-46	nan	-3	nan	-5	nan	85	nan	31	nan	15	nan	3	nan	5.54017	0.119704	-18	nan	355872106177942	nan
Z_91500_4	21202_TRA_Data	22	17/09/2015 (5)	11:54:22.370000	20.912	21202_TRA_Data, 11:54:20 AM (24.8 sec)	1.831	0.053	0.1785	0.0038	0.24312			0.0742	0.0013	0.47338	0.0536	0.0025	9.3	6.7	1052	19	1058	21	1052	47	1012	36	-42	nan	-3	nan	-5	nan	82	nan	31	nan	15	nan	3	nan	5.60224	0.119263	-19	nan	340610659318855	nan
Z_91500_5	21221_TRA_Data	41	17/09/2015 (5)	12:20:41.280000	19.888	21221_TRA_Data, 12:20:38 PM (23.8 sec)	1.833	0.055	0.1774	0.0039	0.33523			0.0752	0.0013	0.44238	0.0531	0.0025	9.3	6.6	1050	20	1051	21	1043	48	1027	38	-39	nan	-3	nan	-4	nan	81	nan	31	nan	15	nan	3	nan	5.63698	0.123925	-40	nan	331678020661995	nan
Z_91500_6	21222_TRA_Data	42	17/09/2015 (5)	12:21:59.210000	24.344	21222_TRA_Data, 12:22:00 PM (25.1 sec)	1.834	0.054	0.1791	0.0038	0.29278			0.0742	0.0013	0.41222	0.0535	0.0025	9.4	6.8	1048	19	1061	21	1049	48	995	37	-55	nan	-4	nan	-6	nan	81	nan	30	nan	15	nan	3	nan	5.58347	0.118466	55	nan	333862784410588	nan
Z_91500_7	21241_TRA_Data	61	17/09/2015 (5)	12:48:17.810000	22.462	21241_TRA_Data, 12:48:18 PM (25.8 sec)	1.878	0.056	0.1809	0.0039	0.2858			0.0753	0.0014	0.43616	0.0566	0.0026	9.4	6.7	1066	20	1071	21	1109	50	1021	37	-62	nan	-5	nan	-7	nan	82	nan	30	nan	15	nan	3	nan	5.52792	0.119176	-16	nan	345129511341890	nan
Z_91500_8	21242_TRA_Data	62	17/09/2015 (5)	12:49:42.990000	19.805	21242_TRA_Data, 12:49:40 PM (24 sec)	1.863	0.055	0.1795	0.0038	0.19783			0.0754	0.0014	0.43548	0.0536	0.0025	9.4	6.9	1061	19	1063	21	1053	48	1022	37	-60	nan	-5	nan	-6	nan	80	nan	31	nan	15	nan	3	nan	5.57103	0.117938	-20	nan	336384845760662	nan
Z_91500_9	21261_TRA_Data	81	17/09/2015 (5)	13:15:56.410000	23.337	21261_TRA_Data, 1:15:56 PM (24.9 sec)	1.835	0.054	0.1799	0.0039	0.28722			0.0741	0.0013	0.42403	0.0533	0.0025	9.4	6.8	1050	20	1065	21	1046	47	984	37	-70	nan	-5	nan	-7	nan	81	nan	30	nan	15	nan	3	nan	5.55864	0.120504	-33	nan	337509815367360	nan
Z_91500_10	21262_TRA_Data	82	17/09/2015 (5)	13:17:16.580000	25.723	21262_TRA_Data, 1:17:18 PM (24.8 sec)	1.837	0.053	0.1768	0.0037	0.21468			0.0754	0.0013	0.47233	0.054	0.0025	9.3	6.7	1052	19	1048	20	1061	47	1027	36	-64	nan	-5	nan	-7	nan	80	nan	30	nan	15	nan	3	nan	5.65611	0.118369	-48	nan	325071839860922	nan
Z_91500_11	21281_TRA_Data	101	17/09/2015 (5)	13:43:38.610000	21.853	21281_TRA_Data, 1:43:37 PM (24 sec)	1.848	0.055	0.1805	0.0039	0.26623			0.0749	0.0013	0.43322	0.055	0.0026	9.4	6.7	1057	20	1068	21	1080	50	1009	37	-66	nan	-5	nan	-7	nan	80	nan	30	nan	15	nan	3	nan	5.54017	0.119704	-30	nan	334700720024842	nan
Z_91500_12	21282_TRA_Data	102	17/09/2015 (5)	13:45:01.620000	21.057	21282_TRA_Data, 1:44:59 PM (23.9 sec)	1.848	0.054	0.1785	0.0038	0.34244			0.0751	0.0013	0.36809	0.0533	0.0025	9.4	6.8	1055	20	1057	21	1047	48	1021	36	-81	nan	-6	nan	-9	nan	80	nan	31	nan	15	nan	3	nan	5.60224	0.119263	-35	nan	332605375992195	nan
Z_91500_13	21301_TRA_Data	121	17/09/2015 (5)	14:11:17.020000	24.661	21301_TRA_Data, 2:11:17 PM (24.6 sec)	1.818	0.053	0.1772	0.0037	0.31883			0.0743	0.0012	0.42145	0.0547	0.0025	9.3	6.7	1045	19	1050	20	1073	48	998	35	-91	nan	-7	nan	-10	nan	80	nan	30	nan	15	nan	3	nan	5.64334	0.117835	-38	nan	329243711547358	nan
Z_91500_14	21302_TRA_Data	122	17/09/2015 (5)	14:12:38.880000	24.795	21302_TRA_Data, 2:12:39 PM (24.7 sec)	1.846	0.054	0.1802	0.0038	0.21723			0.0742	0.0013	0.46986	0.0533	0.0024	9.4	6.7	1056	19	1067	21	1046	46	992	37	-97	nan	-7	nan	-10	nan	80	nan	30	nan	15	nan	3	nan	5.54939	0.117024	-51	nan	334787130505374	nan
Z_91500_15	21321_TRA_Data	141	17/09/2015 (5)	14:38:59.060000	19.875	21321_TRA_Data, 2:38:57 PM (25.7 sec)	1.861	0.057	0.1805	0.0039	0.024781			0.0753	0.0015	0.075565	0.055	0.0027	8.7	6.8	1056	20	1068	21	1078	51	994	40	-84	nan	-6	nan	-8	nan	84	nan	31	nan	16	nan	3	nan	5.54017	0.119704	-20	nan	349266670234728	nan
Z_91500_16	21322_TRA_Data	142	17/09/2015 (5)	14:40:19.220000	24.459	21322_TRA_Data, 2:40:19 PM (24.4 sec)	1.841	0.056	0.1787	0.0038	0.28864			0.0748	0.0014	0.41741	0.0526	0.0026	9.3	6.7	1051	20	1059	21	1032	49	994	39	-91	nan	-7	nan	-9	nan	80	nan	30	nan	15	nan	3	nan	5.59597	0.118997	-43	nan	332626243011820	nan
Z_91500_17	21341_TRA_Data	161	17/09/2015 (5)	15:06:40.490000	20.149	21341_TRA_Data, 3:06:38 PM (24.7 sec)	1.852	0.055	0.1791	0.0039	0.21488			0.0754	0.0014	0.25518	0.0535	0.0025	9.4	6.7	1055	20	1062	21	1051	48	1016	36	-125	nan	-9	nan	-13	nan	83	nan	32	nan	16	nan	3	nan	5.58347	0.121583	-57	nan	343691877477455	nan
Z_91500_18	21342_TRA_Data	162	17/09/2015 (5)	15:08:02.190000	22.491	21342_TRA_Data, 3:07:59 PM (25.6 sec)	1.869	0.055	0.1799	0.0038	0.27156			0.0753	0.0013	0.42883	0.0526	0.0025	9.4	6.7	1063	20	1065	21	1034	47	1022	37	-102	nan	-8	nan	-10	nan	79	nan	30	nan	15	nan	3	nan	5.55864	0.117414	-39	nan	329642099197986	nan
Z_91500_19	21361_TRA_Data	181	17/09/2015 (5)	15:34:17.040000	25.635	21361_TRA_Data, 3:34:17 PM (25.6 sec)	1.872	0.053	0.18	0.0038	0.32417			0.0752	0.0012	0.44711	0.0544	0.0025	9.3	6.7	1065	19	1065	21	1070	49	1038	33	-109	nan	-8	nan	-12	nan	80	nan	30	nan	15	nan	3	nan	5.55556	0.117284	-29	nan	333975334138357	nan
Z_91500_20	21362_TRA_Data	182	17/09/2015 (5)	15:35:42.430000	23.251	21362_TRA_Data, 3:35:40 PM (26.1 sec)	1.877	0.054	0.1808	0.0038	0.021921			0.0755	0.0013	0.22079	0.0527	0.0024	9.4	6.8	1065	19	1070	21	1036	47	1027	35	-132	nan	-10	nan	-14	nan	79	nan	30	nan	15	nan	3	nan	5.53097	0.116248	-20	nan	333474906807952	nan
[truncated: 142 more rows]
[truncated: 22 more columns]

## Sheet: 7324-7-2-735m
	Source file	Analyse nr	Date	Time	Duration(s)	Comments	Final207_235	Final207_235_Prop2SE	Final206_238	Final206_238_Prop2SE	ErrorCorrelation_6_38vs7_35	Final238_206	Final238_206_Prop2SE	Final207_206	Final207_206_Prop2SE	ErrorCorrelation_38_6vs7_6	Final208_232	Final208_232_Prop2SE	Final206_208	Final206_208_Prop2SE	FinalAge207_235	FinalAge207_235_Prop2SE	FinalAge206_238	FinalAge206_238_Prop2SE	FinalAge208_232	FinalAge208_232_Prop2SE	FinalAge207_206	FinalAge207_206_Prop2SE	Final206_204	Final206_204_Prop2SE	Final207_204	Final207_204_Prop2SE	Final208_204	Final208_204_Prop2SE	Approx_U_PPM	Approx_U_PPM_Prop2SE	Approx_Th_PPM	Approx_Th_PPM_Prop2SE	Approx_Pb_PPM	Approx_Pb_PPM_Prop2SE	FInal_U_Th_Ratio	FInal_U_Th_Ratio_Prop2SE	Final238_206	Final238_206_Prop2SE	FinalDiscPercent	FinalDiscPercent_Prop2SE	Dose	Dose_Prop2SE	PDP/histogram:
[truncated: 239 more rows]
[truncated: 22 more columns]

[truncated: 2 more sheets: 7324-8-1-677m, 7324-8-1-685m]
